# Supplementary material for: Identification of genes and gene expression associated with dispersal capacity in the mountain pine beetle, Dendroctonus ponderosae Hopkins (Coleoptera: Curculionidae)
Source: PeerJ. 2021 Oct 26;9:e12382. doi: 10.7717/peerj.12382 (PMC8555496; doi:10.7717/peerj.12382)
Supplement: Supplemental Information 1 [file peerj-09-12382-s001.xlsx]

## Sheet: Strong VS Weak Flier
Accession	Scaffold	baseMean	log2Fold Change	B-H adjusted p-value	Gene Annotation
XM_019901106.1	NW_017851824.1	9930.07	3.78559	2.6142e-22	phosphoglycolate phosphatase 2-like
XM_019903775.1	NW_017852032.1	677.117	2.92826	1.96892e-18	protein giant-lens
XM_019912174.1	NW_017852302.1	2032.22	2.90422	1.72529e-16	kynurenine formamidase-like
XM_019906987.1	NW_017852094.1	7748.55	2.66938	2.44178e-11	lysosome membrane protein 2-like%2C transcript variant X1
XM_019915994.1	NW_017852380.1	19080.5	2.54068	5.82349e-17	probable low-specificity L-threonine aldolase 2%2C transcript variant X1
XM_019901359.1	NW_017851866.1	4524.79	2.53555	1.06263e-12	tryptophan 2%2C3-dioxygenase-like
XM_019899878.1	NW_017851723.1	4292.82	2.53221	1.29567e-12	tryptophan 2%2C3-dioxygenase-like
XM_019901548.1	NW_017851923.1	5255.03	2.51739	1.29567e-12	tryptophan 2%2C3-dioxygenase-like
XM_019901549.1	NW_017851923.1	287.714	2.40643	3.3653e-11	tryptophan 2%2C3-dioxygenase-like
XM_019917936.1	NW_017851181.1	9395.65	2.39475	1.04621e-10	inositol oxygenase
XM_019906322.1	NW_017852082.1	3172.52	2.3298	2.44178e-11	uncharacterized LOC109538892%2C transcript variant X1
XM_019910396.1	NW_017852201.1	1141.67	2.29922	7.74853e-08	argininosuccinate synthase
XM_019915053.1	NW_017852368.1	11271.8	2.28444	3.88067e-11	group XV phospholipase A2-like
XM_019900102.1	NW_017851731.1	220.788	2.08822	4.66592e-06	protein cycle
XM_019917028.1	NW_017851084.1	13110.2	2.08032	6.65165e-13	branched-chain-amino-acid aminotransferase%2C cytosolic
XM_019913763.1	NW_017852342.1	243.787	2.07245	8.58792e-07	proton-coupled folate transporter-like
XM_019907129.1	NW_017852098.1	6176.2	2.03614	4.93483e-07	serine hydrolase-like protein
XM_019905252.1	NW_017852059.1	337.993	2.03494	1.09659e-05	rhamnogalacturonate lyase-like
XM_019917057.1	NW_017851084.1	873.51	2.00756	1.04181e-06	cytochrome P450 4c3-like%2C transcript variant X1
XM_019903737.1	NW_017852030.1	8746.32	2.00523	3.48405e-08	neural/ectodermal development factor IMP-L2%2C transcript variant X1
XM_019905415.1	NW_017852064.1	502.148	2.00354	7.76847e-07	uncharacterized LOC109538260
XM_019911839.1	NW_017852296.1	90.1891	1.99412	1.00206e-05	circadian clock-controlled protein-like
XM_019918004.1	NW_017851181.1	187.722	1.99342	1.77997e-05	putative fatty acyl-CoA reductase CG5065%2C transcript variant X1
XR_002172018.1	NW_017852064.1	831.316	1.98907	5.32689e-08	protein KIAA0556-like%2C transcript variant X1
XM_019905419.1	NW_017852064.1	22013.6	1.95439	1.64009e-06	serine hydroxymethyltransferase%2C cytosolic%2C transcript variant X1
XM_019897788.1	NW_017851239.1	3800.49	1.91243	8.18893e-06	senecionine N-oxygenase-like%2C transcript variant X1
XM_019898558.1	NW_017851465.1	38081.7	1.89406	4.06305e-12	cytochrome P450 6A1-like
XM_019902102.1	NW_017851993.1	18447.5	1.88516	3.7162e-06	D-3-phosphoglycerate dehydrogenase
XM_019917224.1	NW_017851114.1	721.703	1.88417	2.72522e-05	uncharacterized LOC109546305
XM_019903350.1	NW_017852028.1	353.206	1.88078	1.23423e-06	putative inorganic phosphate cotransporter
XM_019903414.1	NW_017852028.1	6913.09	1.87765	2.02998e-05	cytoglobin-1-like
XM_019905803.1	NW_017852073.1	1392.45	1.85647	7.59579e-05	cytochrome b5-like
XM_019915286.1	NW_017852369.1	3182.3	1.8509	2.5304e-14	sphingomyelin phosphodiesterase-like%2C transcript variant X1
NW_017847245.1_c782-7	NW_017847245.1	61.6209	1.82653	3.96682e-08	#N/A
XM_019899299.1	NW_017851651.1	6426.46	1.82421	2.8336e-05	pancreatic triacylglycerol lipase-like
NW_017850402.1_948-1527	NW_017850402.1	120.414	1.80202	1.99647e-06	#N/A
XM_019915004.1	NW_017852366.1	337.791	1.79893	4.86628e-06	sulfotransferase 1C4%2C transcript variant X1
XM_019906467.1	NW_017852083.1	17582.2	1.79808	6.49197e-09	bifunctional methylenetetrahydrofolate dehydrogenase/cyclohydrolase%2C mitochondrial%2C transcript variant X1
XM_019912147.1	NW_017852302.1	558.686	1.78371	4.06553e-08	nuclear receptor subfamily 2 group E member 1
XM_019899575.1	NW_017851683.1	397.684	1.75824	8.54055e-07	farnesol dehydrogenase-like
XM_019903002.1	NW_017852017.1	239.308	1.75368	8.07022e-05	glucose dehydrogenase [FAD%2C quinone]-like
XM_019900378.1	NW_017847130.1	72.3763	1.74086	3.96479e-08	farnesol dehydrogenase-like
XM_019917584.1	NW_017851165.1	1398.19	1.73553	0.000104062	regucalcin-like%2C transcript variant X1
XM_019906385.1	NW_017852083.1	104.759	1.72464	0.000233881	SUN domain-containing protein 3-like
XM_019906856.1	NW_017852091.1	1085.57	1.71231	2.6655e-07	beta-galactosidase-1-like protein 3
XM_019898560.1	NW_017851465.1	7664.49	1.71201	3.56971e-07	cytochrome P450 6a2-like
XM_019907834.1	NW_017852107.1	133.545	1.70343	0.000239753	cuticle protein 7-like
XM_019916990.1	NW_017851084.1	41896.3	1.69294	4.09165e-06	amidophosphoribosyltransferase-like
XM_019903768.1	NW_017852032.1	17328.6	1.68606	3.17127e-10	calcium/calmodulin-dependent protein kinase type 1-like
XM_019902882.1	NW_017852017.1	54.8751	1.68176	0.000318609	choline dehydrogenase%2C mitochondrial-like
XR_002171650.1	NW_017851753.1	352.832	1.66987	0.00034865	uncharacterized LOC109534601
XM_019916067.1	NW_017852381.1	15.0692	1.66807	4.24481e-05	probable E3 ubiquitin-protein ligase makorin-1
XM_019914118.1	NW_017852350.1	768.123	1.6651	1.53949e-08	rutC family protein UK114
XM_019910316.1	NW_017852192.1	1161.42	1.66458	8.43367e-05	putative protein TPRXL%2C transcript variant X1
XM_019916533.1	NW_017852382.1	167.638	1.66326	3.33368e-07	dynein regulatory complex subunit 7
XR_002172582.1	NW_017852366.1	13.0817	1.65336	6.10381e-05	uncharacterized LOC109544438
XM_019903326.1	NW_017852026.1	10.3452	1.65161	0.000236346	uncharacterized LOC109536879
XR_002171904.1	NW_017852033.1	54.1803	1.62547	0.000202599	uncharacterized LOC109537196
XM_019901830.1	NW_017851943.1	7.73256	1.60967	0.000683095	uncharacterized LOC109535823
XM_019906859.1	NW_017852091.1	3045.99	1.60751	4.15893e-07	probable U2 small nuclear ribonucleoprotein A'%2C transcript variant X1
XM_019902883.1	NW_017852017.1	83.0579	1.59674	7.58001e-05	uncharacterized LOC109536598
XM_019915946.1	NW_017852380.1	11975.1	1.57823	2.16258e-08	adenylosuccinate lyase
XM_019915944.1	NW_017852380.1	2099.54	1.56774	4.6964e-05	uncharacterized LOC109545322%2C transcript variant X1
NW_017849041.1_6-3419	NW_017849041.1	430.903	1.56744	1.23018e-08	#N/A
XM_019917820.1	NW_017851174.1	477.859	1.56394	7.88483e-05	pseudouridine-5'-phosphatase-like%2C transcript variant X1
XM_019902313.1	NW_017852003.1	5513.36	1.56055	0.000182298	uncharacterized LOC109536201
XM_019907835.1	NW_017852107.1	786.421	1.55173	0.00106524	multidrug resistance-associated protein 4-like%2C transcript variant X1
XM_019897898.1	NW_017851276.1	320.327	1.54193	5.69858e-06	probable beta-hexosaminidase fdl
XM_019913946.1	NW_017852349.1	8408.06	1.52906	1.02033e-07	probable methylmalonate-semialdehyde dehydrogenase [acylating]%2C mitochondrial%2C transcript variant X1
XM_019900941.1	NW_017847288.1	838.797	1.52861	0.000217227	acyl-CoA synthetase family member 2%2C mitochondrial-like%2C transcript variant X1
XM_019910044.1	NW_017852171.1	271.872	1.52767	0.000210387	cytochrome P450 6k1-like
XM_019905845.1	NW_017852073.1	1136.56	1.51901	0.000224453	acyl-CoA synthetase family member 2%2C mitochondrial-like%2C transcript variant X1
XM_019908357.1	NW_017849040.1	808.731	1.51726	3.61647e-08	aldose reductase-like
XM_019912771.1	NW_017852312.1	3563.03	1.51471	3.03639e-07	putative serine protease F56F10.1
XM_019917134.1	NW_017851087.1	51024	1.49938	0.000429599	probable phosphoserine aminotransferase
XM_019911852.1	NW_017852297.1	4703.37	1.49371	2.12036e-06	beta-hexosaminidase subunit alpha-like
XM_019900136.1	NW_017851737.1	3981.19	1.49083	0.00111005	lysozyme C-1-like
XM_019917332.1	NW_017851136.1	120.13	1.4856	0.00107898	pancreatic lipase-related protein 3-like
XM_019912511.1	NW_017852305.1	1562.77	1.46867	1.96546e-08	scavenger receptor class B member 1-like%2C transcript variant X1
XR_002171627.1	NW_017846997.1	5.16135	1.46274	0.000682432	uncharacterized LOC109534375
XM_019912509.1	NW_017852305.1	11078.1	1.46247	0.000828335	scavenger receptor class B member 1-like%2C transcript variant X1
XM_019915939.1	NW_017852380.1	1430.32	1.44285	0.000236094	uncharacterized LOC109545321%2C transcript variant X1
XM_019912433.1	NW_017852305.1	311.409	1.43804	0.000363612	glucose dehydrogenase [FAD%2C quinone]-like
XM_019903413.1	NW_017852028.1	347.394	1.43625	0.000442396	uncharacterized LOC109536931
XM_019897792.1	NW_017851239.1	193.834	1.42782	4.78535e-08	uracil-DNA glycosylase-like
XR_002171826.1	NW_017852012.1	282.611	1.42238	0.00082793	histidine decarboxylase%2C transcript variant X1
XR_002171801.1	NW_017847728.1	2910.6	1.42204	0.000570045	uncharacterized LOC109536127
XM_019908831.1	NW_017852126.1	377.426	1.41628	0.00120254	venom serine protease-like
XM_019913888.1	NW_017852348.1	77.1199	1.41624	5.87012e-12	probable histone-lysine N-methyltransferase set-23
XM_019905303.1	NW_017852061.1	1356.7	1.41091	1.07566e-05	protein bfr2-like%2C transcript variant X1
NW_017851442.1_c3724-1145	NW_017851442.1	6172.25	1.40281	0.000518535	#N/A
XM_019905567.1	NW_017852064.1	9.43056	1.39875	0.00348787	uncharacterized LOC109538355%2C transcript variant X1
XM_019898706.1	NW_017851523.1	24765.2	1.39807	0.00104175	uncharacterized LOC109533401
XM_019908637.1	NW_017852117.1	5.15202	1.39307	0.00251468	leucine-rich repeat-containing protein 51-like%2C transcript variant X1
XM_019906197.1	NW_017852080.1	34.1978	1.39088	0.000462356	homeobox protein OTX2-like
XR_002171995.1	NW_017852056.1	31.2247	1.38211	0.000196106	uncharacterized LOC109538034
XM_019898842.1	NW_017851565.1	166.091	1.38144	0.00136973	uncharacterized LOC109533505%2C transcript variant X1
XR_002171531.1	NW_017851565.1	34.4846	1.38041	0.00403282	uncharacterized LOC109533508
XM_019898113.1	NW_017851283.1	3602.2	1.37965	0.000245452	alanine--glyoxylate aminotransferase 2-like
XM_019904236.1	NW_017852037.1	36.6819	1.37805	5.85848e-05	uncharacterized LOC109537474%2C transcript variant X1
XM_019902191.1	NW_017847728.1	3574.4	1.37574	0.000545942	lysosomal aspartic protease-like
XM_019917237.1	NW_017851121.1	190.342	1.37335	0.0034275	uncharacterized LOC109546318
XM_019913608.1	NW_017852340.1	7944.24	1.37255	0.00183177	D-arabinitol dehydrogenase 1-like
XM_019898213.1	NW_017851326.1	6.37461	1.37211	0.000426769	keratin%2C type II cytoskeletal 1-like
XM_019901196.1	NW_017851837.1	27.8551	1.3712	3.57708e-05	lipase 3-like
XM_019905761.1	NW_017852072.1	4767.38	1.36615	0.000289886	alanine--glyoxylate aminotransferase 2-like
XM_019914207.1	NW_017852355.1	19610	1.35664	0.00013642	probable cytochrome P450 6a13
XM_019908774.1	NW_017852122.1	16.0034	1.35406	0.000729966	alpha-soluble NSF attachment protein-like
XM_019898565.1	NW_017851470.1	1152.68	1.35144	2.09314e-10	mitochondrial ornithine transporter 1%2C transcript variant X1
XM_019914701.1	NW_017852366.1	39.2118	1.34969	0.00107867	titin-like
XM_019904703.1	NW_017845370.1	1440.66	1.34858	0.00116488	prostaglandin reductase 1-like
XM_019917426.1	NW_017851153.1	11126	1.33588	1.99647e-06	uncharacterized LOC109546460
XR_002172831.1	NW_017851201.1	7.29782	1.33064	0.00517816	uncharacterized LOC109546961
XM_019914500.1	NW_017852363.1	9305.57	1.32636	0.000627018	glucose 1%2C6-bisphosphate synthase%2C transcript variant X1
XM_019908046.1	NW_017852109.1	1972.13	1.32271	2.14347e-06	multidrug resistance-associated protein 4-like
XM_019914230.1	NW_017852355.1	299.102	1.32213	9.17307e-05	uncharacterized LOC109544171%2C transcript variant X1
XM_019901126.1	NW_017851824.1	716.261	1.31805	0.000133043	cytochrome P450 4g1-like
XM_019907649.1	NW_017852104.1	32.4408	1.31384	0.00555971	aminopeptidase N-like%2C transcript variant X1
XM_019915536.1	NW_017852373.1	230.067	1.31361	0.00197769	cytochrome P450 6k1-like%2C transcript variant X1
XM_019900513.1	NW_017847169.1	245.971	1.31351	0.000386073	regucalcin-like
XM_019909009.1	NW_017852127.1	245.971	1.31351	0.000386073	regucalcin-like
XM_019902076.1	NW_017851984.1	1227.04	1.31315	4.14847e-07	membrane metallo-endopeptidase-like 1
XM_019901144.1	NW_017851824.1	3.55189	1.30711	0.00553753	uncharacterized LOC109535259
XM_019917150.1	NW_017851087.1	14880.2	1.29858	1.60488e-08	putative inorganic phosphate cotransporter
XM_019918059.1	NW_017851187.1	123.418	1.29678	1.20281e-06	tetratricopeptide repeat protein 30A
XM_019908912.1	NW_017852126.1	296.785	1.29675	0.0015449	uncharacterized LOC109540501
XM_019911214.1	NW_017852263.1	1821.98	1.29646	0.00167437	uncharacterized LOC109542137
XM_019899787.1	NW_017851704.1	3092.4	1.29479	6.23028e-05	acyl-CoA Delta(11) desaturase
XM_019901766.1	NW_017851937.1	190.478	1.29393	0.000525889	toll-like receptor 3
XM_019910545.1	NW_017852238.1	713.447	1.2931	0.00145998	phosphoglycolate phosphatase 1B%2C chloroplastic-like
XM_019911646.1	NW_017852279.1	3554.14	1.28356	6.26957e-06	protein bicaudal C homolog 1-B
XM_019898846.1	NW_017851569.1	40305.1	1.28123	0.000904833	pectinesterase B-like
XM_019916973.1	NW_017851084.1	24.0686	1.27868	0.00649854	uncharacterized LOC109546141
XM_019901356.1	NW_017851863.1	266.27	1.276	3.12969e-06	transmembrane and TPR repeat-containing protein CG4341-like
XM_019900305.1	NW_017851751.1	27654.9	1.26261	0.00668222	sorbitol dehydrogenase-like
XM_019899906.1	NW_017851724.1	3497.63	1.258	3.40725e-05	4-coumarate--CoA ligase 1-like
XM_019917284.1	NW_017851136.1	1.80782	1.25297	0.00965645	proton-coupled amino acid transporter 1-like
XM_019903429.1	NW_017852028.1	913.887	1.25148	8.0737e-14	polypeptide N-acetylgalactosaminyltransferase 3-like%2C transcript variant X1
XM_019906720.1	NW_017852086.1	196.639	1.25144	4.40549e-05	argininosuccinate lyase
XM_019908715.1	NW_017852117.1	2276.94	1.24611	4.65769e-05	uncharacterized LOC109540361%2C transcript variant X1
XM_019906769.1	NW_017852088.1	5510.72	1.24504	2.61968e-07	zinc finger protein 385B-like
XM_019905321.1	NW_017852061.1	4177.13	1.24249	0.00204059	sodium-independent sulfate anion transporter-like%2C transcript variant X1
XM_019904272.1	NW_017852037.1	153.349	1.24084	0.000564129	uncharacterized LOC109537499
XM_019908711.1	NW_017852117.1	4226.26	1.23942	4.47041e-05	uncharacterized LOC109540358
XM_019905381.1	NW_017852064.1	24.8786	1.23599	0.00243421	uncharacterized LOC109538238
XM_019907119.1	NW_017852097.1	545.524	1.23451	3.27257e-05	coiled-coil domain-containing protein 8 homolog
XM_019916284.1	NW_017852381.1	12301.4	1.2339	0.00414414	glycine dehydrogenase (decarboxylating)%2C mitochondrial
XM_019912796.1	NW_017852312.1	3876.44	1.23352	9.1822e-05	uncharacterized LOC109543212
XM_019902087.1	NW_017851990.1	65308.7	1.23299	0.00157674	pectinesterase B-like
XM_019912785.1	NW_017852312.1	2577.93	1.22855	0.000115265	uncharacterized LOC109543199
XM_019918001.1	NW_017851181.1	252.102	1.22604	0.0018667	cytochrome P450 4C1-like%2C transcript variant X1
XR_002172552.1	NW_017852358.1	38.5963	1.22599	0.000702544	uncharacterized LOC109544233%2C transcript variant X1
XM_019901062.1	NW_017851824.1	12137.6	1.22261	0.00328588	alcohol dehydrogenase [acceptor]-like%2C transcript variant X1
XM_019916923.1	NW_017850979.1	56094.1	1.2186	0.00188591	pectinesterase B-like
XM_019912713.1	NW_017852312.1	5388.33	1.21333	3.56283e-05	uncharacterized LOC109543152
XM_019906503.1	NW_017852083.1	2156.53	1.211	0.00174021	uncharacterized LOC109539000
XM_019905119.1	NW_017852058.1	12.9737	1.20819	0.000524085	zinc finger protein 660-like
XM_019913020.1	NW_017852324.1	10365.2	1.20473	9.25218e-10	uncharacterized LOC109543346
XM_019917544.1	NW_017851160.1	20.1927	1.20344	0.00857838	uncharacterized LOC109546552
XM_019899913.1	NW_017851724.1	2990.34	1.18857	7.78535e-06	4-coumarate--CoA ligase 1-like
XR_002172717.1	NW_017850753.1	661.25	1.18326	6.4454e-05	uncharacterized LOC109545966
XR_002172714.1	NW_017850709.1	661.326	1.18265	6.48758e-05	uncharacterized LOC109545936
XM_019908722.1	NW_017852117.1	3803.82	1.18069	0.000110845	ankyrin-2-like
XR_002172707.1	NW_017850625.1	89.2507	1.17935	0.00861313	uncharacterized LOC109545894
XM_019899377.1	NW_017851651.1	1357.98	1.17789	0.00201614	lipoprotein lipase-like
XM_019911869.1	NW_017852297.1	88903.5	1.17689	0.00105456	C-1-tetrahydrofolate synthase%2C cytoplasmic
XM_019914375.1	NW_017852358.1	555.264	1.17345	0.00649866	glucose dehydrogenase [FAD%2C quinone]-like
XM_019917336.1	NW_017851136.1	958.667	1.17316	0.000367417	sialin%2C transcript variant X1
XM_019909980.1	NW_017852166.1	1851.84	1.17062	0.000277885	uncharacterized LOC109541194
XM_019906136.1	NW_017852075.1	435.671	1.16971	2.20028e-07	growth/differentiation factor 11
XM_019903766.1	NW_017852032.1	14956	1.16781	2.01044e-07	myotubularin-related protein 14%2C transcript variant X1
XM_019914816.1	NW_017852366.1	78.1992	1.16615	0.000442971	golgin subfamily A member 6-like protein 22
XM_019899567.1	NW_017851683.1	68.0254	1.16357	0.00214377	farnesol dehydrogenase-like
XM_019900053.1	NW_017851724.1	211.727	1.15796	2.85113e-05	angiopoietin-2
XM_019911849.1	NW_017852297.1	1062.73	1.15753	0.00031109	beta-hexosaminidase subunit alpha-like
XM_019908718.1	NW_017852117.1	4019.67	1.15635	9.14363e-06	uncharacterized LOC109540362
XM_019913776.1	NW_017852342.1	158.608	1.15473	3.00204e-07	Werner Syndrome-like exonuclease
XR_002171690.1	NW_017851824.1	27.404	1.15398	0.00254951	uncharacterized LOC109535258%2C transcript variant X1
XM_019914486.1	NW_017852363.1	655.761	1.15349	1.38374e-06	protein abnormal spindle-like%2C transcript variant X1
XM_019914314.1	NW_017852358.1	304.054	1.15089	6.62878e-05	NAD-dependent protein deacylase Sirt4
XM_019902050.1	NW_017851980.1	1663.14	1.14587	2.20279e-05	uncharacterized LOC109535989%2C transcript variant X1
XR_002171764.1	NW_017851940.1	395.155	1.1435	0.000185141	uncharacterized LOC109535821
XM_019910019.1	NW_017852168.1	3081.19	1.1405	7.28006e-12	angiotensin-converting enzyme-like
XM_019901991.1	NW_017851963.1	15208.4	1.1393	2.59226e-12	cytosolic purine 5'-nucleotidase
XM_019901444.1	NW_017851893.1	920.775	1.13501	0.00067898	retinol dehydrogenase 14-like
XM_019899742.1	NW_017851697.1	139.781	1.13172	2.10123e-05	UDP-glucuronosyltransferase 2B15-like
XM_019917697.1	NW_017851171.1	120.26	1.12943	1.92853e-05	protein spaetzle-like
XM_019909401.1	NW_017852166.1	213.763	1.12935	0.000951847	cathepsin L1%2C transcript variant X1
XM_019912795.1	NW_017852312.1	1251.78	1.12517	0.000666072	uncharacterized LOC109543211
XM_019905461.1	NW_017852064.1	19096.8	1.12502	0.00206958	trifunctional purine biosynthetic protein adenosine-3
XM_019902073.1	NW_017851984.1	3963.7	1.12459	4.2121e-05	uncharacterized LOC109536009%2C transcript variant X1
XM_019904305.1	NW_017852037.1	680.683	1.1224	8.59284e-05	probable multidrug resistance-associated protein lethal(2)03659%2C transcript variant X1
XM_019908546.1	NW_017849094.1	3311.21	1.12185	3.20569e-11	cytosolic purine 5'-nucleotidase-like
XM_019898437.1	NW_017851434.1	1369.05	1.12026	6.13509e-05	endothelin-converting enzyme 1-like
XM_019917256.1	NW_017851125.1	3711.55	1.12014	7.71958e-05	uncharacterized LOC109546340
XM_019899033.1	NW_017851618.1	45.4466	1.11474	0.00217576	venom carboxylesterase-6-like
XM_019910664.1	NW_017852245.1	489.209	1.11444	0.000832504	zinc finger and SCAN domain-containing protein 10-like
XM_019902696.1	NW_017852012.1	10676.2	1.11435	3.59435e-06	putative vitellogenin receptor%2C transcript variant X1
XM_019915359.1	NW_017852370.1	1299.29	1.11255	6.19267e-08	serine/threonine-protein kinase SIK2-like%2C transcript variant X1
XR_002172266.1	NW_017852166.1	1171.07	1.10863	5.26842e-05	uncharacterized LOC109540917
XM_019907481.1	NW_017852103.1	10963.2	1.10833	0.000424327	alpha-aminoadipic semialdehyde synthase%2C mitochondrial
XM_019912793.1	NW_017852312.1	2174.42	1.10829	0.000140577	uncharacterized LOC109543208
XM_019916053.1	NW_017852380.1	641.71	1.10792	2.00495e-05	zinc finger and BTB domain-containing protein 8A-like%2C transcript variant X1
XM_019898202.1	NW_017851323.1	1890.61	1.1073	8.03928e-11	45 kDa calcium-binding protein%2C transcript variant X1
XM_019916896.1	NW_017850933.1	518.342	1.10729	0.000132827	uncharacterized LOC109546061
XM_019906507.1	NW_017852083.1	733.662	1.10688	1.62434e-05	uncharacterized LOC109539002
XM_019916931.1	NW_017851001.1	64.7102	1.10679	0.00680132	serine protease snake-like
XM_019903357.1	NW_017852028.1	7298.41	1.10217	3.53181e-13	transducin beta-like protein 2%2C transcript variant X1
XM_019899743.1	NW_017851699.1	1089.74	1.1019	5.90003e-12	angiotensin-converting enzyme-like
NW_017852067.1_75595-89820	NW_017852067.1	31.9484	1.09904	0.00463991	#N/A
XM_019905707.1	NW_017852070.1	874.894	1.09698	0.00350843	prostaglandin reductase 1-like
XM_019913249.1	NW_017852336.1	257.752	1.09482	0.0025582	O-acyltransferase like protein-like
XR_002171902.1	NW_017848143.1	41.7877	1.09278	0.00598508	uncharacterized LOC109537179
XM_019909454.1	NW_017852166.1	3054.93	1.09274	9.8657e-06	uncharacterized LOC109540914%2C transcript variant X1
XM_019905459.1	NW_017852064.1	13883.3	1.09153	0.000328657	galactokinase-like
XM_019898098.1	NW_017851282.1	7496.77	1.09108	6.27452e-05	prion-like-(Q/N-rich) domain-bearing protein 25%2C transcript variant X1
XM_019902903.1	NW_017852017.1	1027.92	1.0905	0.00543155	uncharacterized LOC109536617
XM_019912792.1	NW_017852312.1	6256.8	1.08963	0.000533334	uncharacterized LOC109543207
XM_019899385.1	NW_017851651.1	9580.29	1.08928	0.00344134	transmembrane protein 205
XM_019909956.1	NW_017852166.1	1319.73	1.08548	6.36479e-06	protein cortex-like
XM_019914180.1	NW_017850005.1	156.825	1.08352	0.00484592	uncharacterized LOC109544136
XM_019899744.1	NW_017851699.1	763.16	1.08235	6.00088e-10	angiotensin-converting enzyme-like
XM_019905720.1	NW_017852070.1	510.546	1.08044	0.00262955	UDP-glucuronosyltransferase 2B17-like
XM_019902075.1	NW_017851984.1	3551.21	1.07857	0.000194496	neprilysin-2-like
XM_019899788.1	NW_017851704.1	328.132	1.07782	0.00324531	UDP-glucuronosyltransferase 2B10-like
XM_019908331.1	NW_017852111.1	1370.29	1.07647	0.00143041	fatty acyl-CoA reductase wat-like
XM_019912676.1	NW_017852312.1	1319.12	1.07471	0.000820112	uncharacterized LOC109543129
XM_019912327.1	NW_017852302.1	2138.93	1.07385	0.00694673	synaptic vesicle glycoprotein 2B-like
XM_019900395.1	NW_017851760.1	28370.9	1.07307	0.000844146	venom acid phosphatase Acph-1-like
XM_019902438.1	NW_017852012.1	6608.83	1.07238	1.35048e-07	deoxyuridine 5'-triphosphate nucleotidohydrolase
XR_002171629.1	NW_017851724.1	70.4572	1.07104	1.00144e-05	uncharacterized LOC109534406
XM_019917742.1	NW_017851174.1	29021.2	1.06626	9.84021e-05	fumarate hydratase%2C mitochondrial-like
XM_019912784.1	NW_017852312.1	2024.23	1.06598	7.79949e-05	uncharacterized LOC109543198
XM_019904176.1	NW_017852037.1	610.705	1.06596	0.00560788	clavesin-2-like
XM_019905236.1	NW_017852059.1	10378.3	1.06587	3.27643e-06	alcohol dehydrogenase [NADP(+)]-like
XM_019908034.1	NW_017852109.1	1968.45	1.06583	0.00029001	L-galactose dehydrogenase-like%2C transcript variant X1
XM_019916831.1	NW_017850811.1	35.264	1.06512	0.000757269	uncharacterized LOC109545992
XM_019901400.1	NW_017851876.1	206.937	1.06502	6.00673e-07	separin
XM_019902060.1	NW_017851984.1	2770.33	1.06386	0.000167535	uncharacterized LOC109535998
XM_019904980.1	NW_017852056.1	646.711	1.06262	4.82884e-06	actin-like protein 6B%2C transcript variant X1
XM_019916798.1	NW_017850731.1	646.657	1.06236	0.00471853	sideroflexin-1-like
XM_019902097.1	NW_017851993.1	2155.74	1.06141	1.03847e-07	serine/threonine-protein kinase polo%2C transcript variant X1
XM_019913228.1	NW_017852332.1	94.9116	1.05824	0.00152055	glucose dehydrogenase [FAD%2C quinone]-like
XM_019904215.1	NW_017852037.1	160.402	1.05795	0.00277624	calcitonin receptor-like%2C transcript variant X1
XM_019917254.1	NW_017851125.1	3932.76	1.0579	0.00034865	uncharacterized LOC109546339
XM_019900427.1	NW_017851769.1	1040.21	1.05566	1.62434e-05	monocarboxylate transporter 3-like
XM_019899763.1	NW_017851702.1	12058.3	1.05457	2.15462e-07	uncharacterized LOC109534191
XM_019916886.1	NW_017850913.1	12058.2	1.05455	2.15462e-07	uncharacterized LOC109546052
XM_019898811.1	NW_017851554.1	2665.34	1.05306	1.39079e-06	chorion peroxidase
XR_002171630.1	NW_017851724.1	67.1863	1.05271	1.53442e-05	uncharacterized LOC109534407
XM_019908702.1	NW_017852117.1	1177.66	1.05162	8.22309e-05	transcription factor Sox-14
XM_019900311.1	NW_017851751.1	191.757	1.04857	0.00137003	uncharacterized LOC109534591
XM_019906531.1	NW_017852083.1	2571.11	1.04574	4.52451e-05	cyclin-A2-like
XM_019916364.1	NW_017852381.1	3724.5	1.04347	0.00125242	elongation of very long chain fatty acids protein 7-like
XM_019906885.1	NW_017852091.1	39.073	1.04288	0.005348	tryptase beta-2-like
XM_019918243.1	NW_017851217.1	1094.57	1.04271	2.50982e-05	uncharacterized LOC109547027
XM_019912799.1	NW_017852312.1	2054.67	1.04174	0.000240329	uncharacterized LOC109543214
XM_019900280.1	NW_017851743.1	1131.5	1.04028	3.1897e-06	putative molluscan insulin-related peptide(s) receptor
XM_019900426.1	NW_017851769.1	698.227	1.03977	4.81104e-05	uncharacterized LOC109534680
XM_019911045.1	NW_017849453.1	1299.26	1.0394	3.17343e-05	uncharacterized LOC109542017
XM_019916090.1	NW_017852381.1	5900.84	1.0391	1.21376e-05	solute carrier family 25 member 35-like%2C transcript variant X1
XM_019899438.1	NW_017846838.1	308.886	1.03873	1.25346e-05	uncharacterized LOC109533922
XM_019904979.1	NW_017852056.1	935.329	1.03865	0.000182298	uncharacterized LOC109537971
XM_019900254.1	NW_017851737.1	279.827	1.03686	3.66557e-08	tRNA-specific adenosine deaminase 1%2C transcript variant X1
XM_019906085.1	NW_017852073.1	1102.08	1.03649	4.33918e-05	E3 ubiquitin-protein ligase SINAT2-like%2C transcript variant X1
XM_019910423.1	NW_017852214.1	27.4572	1.03636	0.00107568	uncharacterized LOC109541546
XM_019912400.1	NW_017852305.1	1364.22	1.0351	1.19638e-05	high mobility group protein HMGI-C
XM_019911828.1	NW_017852296.1	571.415	1.03504	6.5943e-07	protein phosphatase 1 regulatory subunit 12A%2C transcript variant X1
XR_002172113.1	NW_017852097.1	164.11	1.03485	0.000401063	uncharacterized LOC109539402
XM_019906151.1	NW_017852076.1	1282.67	1.03403	0.000221641	lipase 3-like
XM_019909968.1	NW_017852166.1	2078.6	1.03258	0.0022492	uncharacterized LOC109541182%2C transcript variant X1
XM_019899282.1	NW_017851651.1	35813.6	1.03137	0.000237226	SEC23-interacting protein%2C transcript variant X1
XM_019905804.1	NW_017852073.1	432.091	1.03037	0.00725049	acyl-CoA synthetase family member 2%2C mitochondrial-like
XM_019912773.1	NW_017852312.1	5027.3	1.03001	0.000427179	mucin-2-like
XM_019905052.1	NW_017852056.1	1242.42	1.02931	0.000529425	protein eiger
XM_019899789.1	NW_017851704.1	62.3553	1.02885	8.04367e-05	UDP-glucuronosyltransferase 2B10-like
XR_002171740.1	NW_017851926.1	10986.6	1.02879	1.62434e-05	uncharacterized LOC109535649
XM_019917333.1	NW_017851136.1	1295.06	1.02862	0.00587661	laminin subunit gamma-1
XM_019907492.1	NW_017852103.1	1386.54	1.02807	1.06978e-08	phosphoglucomutase-2-like%2C transcript variant X1
XM_019906883.1	NW_017852091.1	15441.2	1.02783	0.00131468	protein henna%2C transcript variant X1
XM_019916736.1	NW_017850625.1	77.8513	1.02762	0.00946307	proline-rich nuclear receptor coactivator 2-like
XM_019915451.1	NW_017852371.1	3229.9	1.02762	6.40257e-05	G2/mitotic-specific cyclin-B
XM_019904417.1	NW_017852038.1	716.656	1.02547	0.00490837	follicle cell protein 3C-1
XM_019911108.1	NW_017852258.1	9938.77	1.02304	0.000836722	zinc transporter ZIP13-like
XM_019907058.1	NW_017852096.1	8157.19	1.02235	0.00949389	uncharacterized LOC109539363%2C transcript variant X1
XM_019903443.1	NW_017852028.1	1191.33	1.02203	0.000124466	bone morphogenetic protein receptor type-1B-like
XR_002171748.1	NW_017851937.1	430.241	1.0219	8.18893e-06	uncharacterized LOC109535711%2C transcript variant X1
XM_019915962.1	NW_017852380.1	2648.25	1.02165	6.01228e-07	inositol-3-phosphate synthase%2C transcript variant X1
XM_019915278.1	NW_017850235.1	587.279	1.01999	2.51417e-05	uncharacterized LOC109544872
XM_019900281.1	NW_017851743.1	2999.24	1.01923	4.3199e-06	insulin receptor-like
XM_019915947.1	NW_017852380.1	15.5423	1.01885	0.00690709	uncharacterized LOC109545324%2C transcript variant X1
XM_019905006.1	NW_017852056.1	28073.7	1.01767	0.00120016	uncharacterized LOC109537989
XM_019898996.1	NW_017851612.1	582.815	1.01652	8.22309e-05	putative ankyrin repeat protein RF_0381
XM_019916882.1	NW_017845920.1	49.8008	1.01517	0.00272368	carbohydrate sulfotransferase 1-like
XM_019917696.1	NW_017851171.1	119.539	1.013	0.00570597	facilitated trehalose transporter Tret1-like
XR_002172389.1	NW_017852254.1	1051.46	1.0128	0.000353551	uncharacterized LOC109541959
XM_019915339.1	NW_017852369.1	558.232	1.01202	3.30146e-05	maternal embryonic leucine zipper kinase-like
XM_019901101.1	NW_017851824.1	227.195	1.0119	0.000687329	uncharacterized LOC109535222
XM_019917344.1	NW_017851138.1	5365.41	1.01126	5.73576e-05	uncharacterized LOC109546393
XM_019905081.1	NW_017852057.1	1368.13	1.01088	2.31725e-06	uncharacterized LOC109538042%2C transcript variant X1
XM_019910589.1	NW_017852242.1	513.991	1.01081	0.00338986	synaptotagmin-11-like
XM_019915367.1	NW_017852371.1	1716.3	1.01037	3.56341e-08	nucleoprotein TPR-like
XM_019914242.1	NW_017852355.1	13535	1.0098	0.00087261	esterase B1-like
XM_019905774.1	NW_017852073.1	136.199	1.00831	0.00152281	uncharacterized LOC109538522
XM_019905080.1	NW_017852057.1	580.935	1.00611	7.5087e-06	uncharacterized LOC109538041
XM_019901742.1	NW_017851937.1	5344.63	1.00545	0.000288168	kidney mitochondrial carrier protein 1%2C transcript variant X1
XM_019905351.1	NW_017852062.1	4511.26	1.00492	3.44438e-05	homeobox protein Hox-B3a-like%2C transcript variant X1
XM_019900077.1	NW_017851724.1	927.386	1.00392	2.12435e-05	histone-lysine N-methyltransferase SMYD3-like
XM_019913238.1	NW_017852336.1	676.522	1.00362	0.00121698	uncharacterized LOC109543501
XM_019898885.1	NW_017851587.1	1065.11	1.00329	3.56267e-05	E3 ubiquitin-protein ligase SINAT2-like%2C transcript variant X1
XM_019917728.1	NW_017851174.1	13.8606	1.00307	0.00163434	cuticle protein 7-like
XM_019905512.1	NW_017852064.1	1866.25	1.00292	0.000167749	tolloid-like protein 1%2C transcript variant X1
XM_019912789.1	NW_017852312.1	1959.47	1.00247	0.000156862	uncharacterized LOC109543204
XM_019905062.1	NW_017852056.1	444.732	1.00097	6.4454e-05	protein rolling stone-like%2C transcript variant X1
XM_019904698.1	NW_017852055.1	711.461	1.00009	1.67438e-05	uncharacterized LOC109537806
XM_019897977.1	NW_017851282.1	11920.7	0.998837	6.08604e-05	uncharacterized LOC109532875%2C transcript variant X1
XM_019916148.1	NW_017852381.1	589.401	0.997868	5.7599e-06	myosin-10-like
XM_019899182.1	NW_017851649.1	796.209	0.997532	2.80337e-05	uncharacterized LOC109533777
XM_019917499.1	NW_017851160.1	186.502	0.995645	6.01354e-06	kinesin-like protein KLP2
XM_019900078.1	NW_017851724.1	394.342	0.995256	6.74835e-05	uncharacterized LOC109534405
XM_019917971.1	NW_017851181.1	184.839	0.994807	0.00900556	uncharacterized LOC109546834
XM_019916604.1	NW_017852582.1	2658.68	0.993096	0.000330182	uncharacterized LOC109545762
XM_019906207.1	NW_017852080.1	919.533	0.992677	5.75483e-05	juvenile hormone epoxide hydrolase 1-like
XM_019899020.1	NW_017851618.1	4541.27	0.99009	0.00322925	glutathione S-transferase-like%2C transcript variant X1
XM_019898016.1	NW_017846438.1	239.931	0.989931	4.71113e-05	insulin receptor-like
XM_019909347.1	NW_017852166.1	1719.38	0.989067	7.59579e-05	uncharacterized LOC109540857
XM_019913853.1	NW_017852348.1	2619.91	0.988248	3.5054e-05	polyadenylate-binding protein 4-like%2C transcript variant X1
XM_019913271.1	NW_017849791.1	1517.9	0.986359	4.15893e-07	mitochondrial amidoxime reducing component 2-like%2C transcript variant X1
XM_019913255.1	NW_017849790.1	1518.28	0.986134	4.14394e-07	mitochondrial amidoxime reducing component 2-like%2C transcript variant X1
XM_019901462.1	NW_017851898.1	121.204	0.985293	2.47193e-06	CUE domain-containing protein 2
XM_019904632.1	NW_017852049.1	13392.5	0.983341	1.10514e-06	ornithine aminotransferase%2C mitochondrial%2C transcript variant X1
XM_019915578.1	NW_017852375.1	2076.42	0.981964	3.60516e-07	mitochondrial amidoxime reducing component 2-like%2C transcript variant X1
XM_019910868.1	NW_017852247.1	1025.69	0.98122	1.14559e-05	uncharacterized LOC109541875%2C transcript variant X1
XM_019908689.1	NW_017852117.1	50465.2	0.980874	3.48015e-05	uncharacterized LOC109540340%2C transcript variant X1
XM_019898808.1	NW_017851552.1	196.51	0.980692	0.00818548	soluble guanylate cyclase 89Db-like
XR_002171981.1	NW_017852056.1	1677	0.980276	0.000198155	uncharacterized LOC109537880
XM_019902070.1	NW_017851984.1	2632.49	0.979094	0.00116488	endothelin-converting enzyme 1-like
XM_019912359.1	NW_017852302.1	94.0639	0.978298	0.006721	protein artichoke-like
XM_019901802.1	NW_017851937.1	16.9859	0.978094	0.00444953	cuticle protein CP14.6-like
XM_019916950.1	NW_017851049.1	1345.67	0.973973	5.78433e-06	anaphase-promoting complex subunit 4-like
XM_019914495.1	NW_017850060.1	1345.52	0.973824	5.78433e-06	anaphase-promoting complex subunit 4-like
XM_019903834.1	NW_017848150.1	1600.2	0.972762	1.22003e-05	anaphase-promoting complex subunit 4-like
XM_019905553.1	NW_017852064.1	664.932	0.971572	1.78358e-05	ovarian-specific serine/threonine-protein kinase Lok-like
NW_017850235.1_1947-2566	NW_017850235.1	299.492	0.969496	4.58404e-05	#N/A
XM_019910042.1	NW_017852170.1	174.937	0.96943	0.00034865	neurotrimin-like%2C transcript variant X1
XM_019910793.1	NW_017852245.1	844.719	0.968594	2.17841e-05	COP9 signalosome complex subunit 1-like%2C transcript variant X1
XM_019900421.1	NW_017847141.1	2137.63	0.968123	3.40558e-06	anaphase-promoting complex subunit 4-like
NW_017846633.1_2849-3465	NW_017846633.1	299.12	0.967805	4.71113e-05	#N/A
NW_017851743.1_c628-13	NW_017851743.1	299.12	0.967805	4.71113e-05	#N/A
XM_019912155.1	NW_017852302.1	565.123	0.964624	7.44848e-05	serine/threonine-protein kinase mos
XM_019902481.1	NW_017852012.1	250.328	0.963459	0.000124048	paired box protein Pax-5
XM_019900648.1	NW_017851783.1	800.384	0.963042	6.99029e-05	bone morphogenetic protein 7-like
XM_019910397.1	NW_017852201.1	347.06	0.962164	6.02837e-09	ribonuclease H2 subunit A
XM_019898735.1	NW_017851531.1	11779.9	0.961944	0.00139962	protein I'm not dead yet%2C transcript variant X1
XM_019901512.1	NW_017851914.1	1357.65	0.960768	1.39008e-05	anaphase-promoting complex subunit 4-like
XM_019898321.1	NW_017851382.1	498.371	0.960082	3.05153e-06	uncharacterized LOC109533091%2C transcript variant X1
XM_019899073.1	NW_017851633.1	35936.2	0.959267	0.00179486	bifunctional purine biosynthesis protein PURH%2C transcript variant X1
XM_019912320.1	NW_017849639.1	289.054	0.958514	1.36361e-05	insulin-like growth factor 1 receptor
XM_019909868.1	NW_017852166.1	5001.3	0.95731	0.000192582	protein-serine O-palmitoleoyltransferase porcupine%2C transcript variant X1
XM_019900345.1	NW_017851758.1	23848.5	0.956167	0.00825874	myrosinase 1-like
XM_019908288.1	NW_017852110.1	160.399	0.955097	5.0182e-05	phospholipase B1%2C membrane-associated-like
XM_019915735.1	NW_017852377.1	5514.06	0.950883	0.000164354	serine/threonine-protein kinase Nek8-like
XM_019898436.1	NW_017851434.1	310.599	0.949019	0.000178544	bombesin receptor subtype-3-like
XM_019901048.1	NW_017851824.1	1198.96	0.94873	8.02219e-07	protein aurora borealis
XM_019907820.1	NW_017852106.1	17140.9	0.948215	5.74224e-07	synaptic vesicle glycoprotein 2B-like%2C transcript variant X1
XM_019914997.1	NW_017852366.1	381.212	0.946958	0.00463534	amyloid protein-binding protein 2
XM_019905740.1	NW_017852071.1	2215.62	0.946525	2.8276e-07	kinesin-like protein subito%2C transcript variant X1
XM_019911143.1	NW_017852258.1	7452.97	0.944542	0.000116807	equilibrative nucleoside transporter 1%2C transcript variant X1
XM_019910947.1	NW_017852254.1	11730.2	0.944165	0.00493271	ATP-binding cassette sub-family A member 3-like
XM_019917542.1	NW_017851160.1	1488.88	0.942453	8.2596e-05	uncharacterized LOC109546550
XM_019916368.1	NW_017852381.1	79.4633	0.941288	0.00244051	glutamate receptor ionotropic%2C kainate 2-like
XM_019909346.1	NW_017849221.1	7925.3	0.939886	0.000152799	uncharacterized LOC109540853
XM_019910894.1	NW_017849431.1	7924.31	0.939876	0.000152799	uncharacterized LOC109541897
XM_019910175.1	NW_017852178.1	10539.4	0.937804	0.00219332	spermatogenesis-associated protein 20%2C transcript variant X1
XM_019915687.1	NW_017852377.1	1806.49	0.936568	0.000307341	probable phospholipid hydroperoxide glutathione peroxidase%2C transcript variant X1
XM_019906204.1	NW_017848797.1	1806.52	0.936559	0.000307388	probable phospholipid hydroperoxide glutathione peroxidase%2C transcript variant X1
XM_019902086.1	NW_017851990.1	153048	0.935795	0.00970788	pectinesterase B-like
XM_019903419.1	NW_017852028.1	321.4	0.935246	4.18952e-05	G1/S-specific cyclin-E
XM_019900228.1	NW_017851737.1	914.411	0.934261	5.24273e-09	small ubiquitin-related modifier 3-like
XM_019912349.1	NW_017852302.1	2217.04	0.932576	3.36936e-05	GPI mannosyltransferase 3
XR_002171435.1	NW_017851236.1	152.954	0.931991	0.00577754	uncharacterized LOC109532713
XM_019900571.1	NW_017851775.1	338.488	0.931894	0.00537212	endocuticle structural glycoprotein SgAbd-4-like
XM_019913377.1	NW_017852336.1	1155.13	0.931296	0.000510314	uncharacterized LOC109543585
XM_019914057.1	NW_017852350.1	1226.62	0.930477	1.41232e-06	cyclin-dependent kinase 1
XM_019905728.1	NW_017852070.1	1233.38	0.92706	1.83433e-06	lysoplasmalogenase-like protein TMEM86A
XM_019904174.1	NW_017852037.1	313.879	0.926574	0.000798424	mitotic spindle assembly checkpoint protein MAD2A
XM_019916394.1	NW_017852381.1	1683.91	0.926517	0.000112687	anillin-like
XM_019917232.1	NW_017851115.1	1384.48	0.923985	6.12444e-05	GATA-binding factor A-like%2C transcript variant X1
XM_019901074.1	NW_017851824.1	6137.56	0.923662	7.58001e-05	uncharacterized LOC109535199
XM_019914181.1	NW_017852355.1	2108.25	0.922831	0.00279141	5-oxoprolinase
XM_019917484.1	NW_017851159.1	67.8605	0.919797	0.00334847	zinc finger and BTB domain-containing protein 8A.2
XM_019917608.1	NW_017851169.1	191.456	0.919648	0.000475384	probable multidrug resistance-associated protein lethal(2)03659
XM_019898408.1	NW_017851407.1	141.85	0.918621	0.000408443	carboxy-terminal kinesin 2-like
XM_019917355.1	NW_017851142.1	1861.32	0.91829	0.000135049	poly(A) RNA polymerase gld-2 homolog A
XM_019916905.1	NW_017850947.1	1861.38	0.918184	0.000135275	poly(A) RNA polymerase gld-2 homolog A-like
XM_019905814.1	NW_017852073.1	474.319	0.917122	5.1347e-05	kinesin-like protein KIF14
XM_019900000.1	NW_017851724.1	1253.43	0.912217	0.000216648	targeting protein for Xklp2%2C transcript variant X1
XM_019912791.1	NW_017852312.1	1718.63	0.911887	0.00502468	uncharacterized LOC109543206
XM_019914667.1	NW_017852366.1	303.992	0.909407	0.00148897	uncharacterized LOC109544472
XM_019898995.1	NW_017851612.1	709.131	0.908986	0.00201447	ankyrin-3-like
XM_019914620.1	NW_017852366.1	2373.02	0.908674	3.22986e-05	cytochrome b5-related protein
XM_019905113.1	NW_017852058.1	34703.9	0.908328	0.000151009	actin%2C muscle-like
XM_019905183.1	NW_017852058.1	331.257	0.907366	2.75922e-07	haloacid dehalogenase-like hydrolase domain-containing protein 2
XM_019918244.1	NW_017851217.1	1011.61	0.906827	0.000492978	protein ovarian tumor locus-like
XM_019899559.1	NW_017851680.1	1042.15	0.905916	0.000469704	zinc finger protein 43-like%2C transcript variant X1
XM_019913366.1	NW_017852336.1	685.093	0.904259	1.05984e-05	protein nessun dorma-like
XM_019914280.1	NW_017852358.1	348.619	0.904053	0.00926377	uncharacterized LOC109544211
XM_019900404.1	NW_017851760.1	2289.91	0.902812	0.00475241	venom carboxylesterase-6-like
XM_019898897.1	NW_017851590.1	1945.25	0.902677	0.00120062	mitochondrial amidoxime reducing component 2-like%2C transcript variant X1
XM_019914249.1	NW_017852355.1	819.517	0.900414	0.000751325	m-AAA protease-interacting protein 1%2C mitochondrial
XM_019914383.1	NW_017852358.1	165.775	0.893896	0.000532196	mannose-binding protein C
XM_019903805.1	NW_017852034.1	422.619	0.892937	0.0031999	uncharacterized LOC109537199
XM_019909039.1	NW_017852128.1	678.415	0.89277	4.74669e-07	peroxiredoxin-6
XM_019898650.1	NW_017851509.1	7236.01	0.892708	0.00143041	uncharacterized LOC109533356
XM_019912366.1	NW_017852302.1	3573.46	0.892417	0.00167437	uncharacterized LOC109542908
XM_019899407.1	NW_017851651.1	362.636	0.892062	0.00040041	M-phase inducer phosphatase-like%2C transcript variant X1
XM_019908658.1	NW_017852117.1	1070.25	0.890791	5.52162e-05	G2/mitotic-specific cyclin-B3%2C transcript variant X1
XM_019905168.1	NW_017852058.1	2649.31	0.890532	3.60262e-05	glutathione S-transferase-like
XR_002172066.1	NW_017852077.1	179.854	0.890302	0.000183706	uncharacterized LOC109538798
XM_019909493.1	NW_017852166.1	485.666	0.889843	0.00558189	uncharacterized LOC109540938
XM_019901716.1	NW_017851937.1	6624.16	0.886866	0.000180803	ankyrin-3%2C transcript variant X1
XM_019909970.1	NW_017852166.1	1776.33	0.88643	0.00202084	trichohyalin-like
XM_019899042.1	NW_017851628.1	30059.8	0.882112	0.00507009	phosphoenolpyruvate carboxykinase [GTP]-like
XM_019912568.1	NW_017852305.1	2696.6	0.880048	0.000347612	APOBEC1 complementation factor-like%2C transcript variant X1
XM_019911132.1	NW_017852258.1	39363.9	0.879592	0.0011278	sterol O-acyltransferase 1
XR_002171851.1	NW_017852014.1	99.4632	0.878611	0.00674851	uncharacterized LOC109536532
XM_019906541.1	NW_017852085.1	851.935	0.875976	2.2133e-06	anoctamin-5
XM_019899880.1	NW_017851724.1	343.952	0.875244	0.000420233	uncharacterized LOC109534281
XM_019913385.1	NW_017852336.1	16032.2	0.875028	6.42726e-06	farnesyl pyrophosphate synthase%2C transcript variant X1
XM_019901157.1	NW_017851827.1	1254.35	0.874243	0.00175952	uncharacterized LOC109535268
XM_019908494.1	NW_017852115.1	52167.2	0.873617	5.14143e-05	short/branched chain specific acyl-CoA dehydrogenase%2C mitochondrial
XM_019916335.1	NW_017852381.1	168.939	0.873029	0.000133043	DNA repair protein RAD51 homolog 4-like
XM_019901159.1	NW_017851827.1	178.666	0.870993	3.7198e-05	probable cytochrome P450 4aa1
XM_019913196.1	NW_017852329.1	1896.95	0.869278	0.00308707	endothelin-converting enzyme 1-like
XM_019910738.1	NW_017852245.1	633.705	0.867699	1.53486e-05	mini-chromosome maintenance complex-binding protein
XM_019914949.1	NW_017852366.1	325.369	0.866717	0.000400491	voltage-dependent T-type calcium channel subunit alpha-1G-like
XM_019913216.1	NW_017852329.1	9519.95	0.86544	8.70287e-05	fatty acid-binding protein%2C liver
XM_019911832.1	NW_017852296.1	7357.99	0.864379	0.000318839	pantothenate kinase 4
XM_019897720.1	NW_017851231.1	449.562	0.861659	3.09524e-07	DNA mismatch repair protein Msh2-like
XM_019914026.1	NW_017852350.1	10743.3	0.859899	4.11537e-06	uncharacterized LOC109544033%2C transcript variant X1
XM_019908670.1	NW_017852117.1	17.4641	0.859299	0.00610199	nose resistant to fluoxetine protein 6-like%2C transcript variant X1
XM_019910236.1	NW_017852181.1	2257.76	0.858932	0.000469704	geranylgeranyl pyrophosphate synthase%2C transcript variant X1
XM_019907949.1	NW_017852107.1	1376.44	0.858018	0.000772571	T-related protein
XM_019908829.1	NW_017852126.1	73.7469	0.857776	0.00231543	venom serine protease-like
XR_002172584.1	NW_017852366.1	1742.81	0.857291	0.00177869	uncharacterized LOC109544447
XM_019912354.1	NW_017852302.1	2551.28	0.855992	9.54179e-05	uncharacterized LOC109542898%2C transcript variant X1
XM_019915491.1	NW_017852371.1	611.56	0.853731	1.08554e-05	NADPH oxidase 5%2C transcript variant X1
XM_019898438.1	NW_017851435.1	61.8108	0.853625	0.00435171	helix-loop-helix protein delilah-like
XM_019903093.1	NW_017852017.1	297.367	0.8529	0.00650179	uncharacterized LOC109536742
XM_019916002.1	NW_017852380.1	927.901	0.852864	0.000453245	uncharacterized LOC109545349%2C transcript variant X1
XR_002172757.1	NW_017851105.1	8406.74	0.851524	0.00331786	aldose reductase-like
XR_002171509.1	NW_017851481.1	8404.86	0.851469	0.00331786	aldose reductase-like
XM_019910884.1	NW_017849431.1	277.025	0.851429	6.82802e-05	sodium channel protein 60E-like
XM_019916746.1	NW_017850652.1	7526.01	0.850971	0.00335993	aldose reductase-like
XM_019899101.1	NW_017851633.1	16931.3	0.850826	0.00182792	uncharacterized LOC109533709%2C transcript variant X1
XM_019907029.1	NW_017852096.1	2828.52	0.84869	0.0064047	diphosphomevalonate decarboxylase%2C transcript variant X1
XM_019917604.1	NW_017851169.1	811.517	0.847368	8.61223e-06	multidrug resistance-associated protein 4-like
XM_019915776.1	NW_017850281.1	6559.12	0.84565	1.19202e-05	ATP-dependent RNA helicase p62-like
XM_019911438.1	NW_017852269.1	4319.33	0.845237	0.00165523	juvenile hormone epoxide hydrolase 1-like
XM_019906568.1	NW_017852085.1	313.253	0.844416	3.2267e-05	xyloside xylosyltransferase 1-like
XM_019912358.1	NW_017852302.1	409.139	0.844319	1.60342e-05	U7 snRNA-associated Sm-like protein LSm11
XM_019905050.1	NW_017852056.1	928.344	0.842564	0.0025087	very-long-chain 3-oxoacyl-CoA reductase
XM_019911219.1	NW_017852263.1	1236.05	0.838025	0.000472026	voltage-dependent calcium channel subunit alpha-2/delta-3%2C transcript variant X1
XM_019915891.1	NW_017852380.1	5314.66	0.837849	3.38539e-05	androgen-induced gene 1 protein-like
XM_019899086.1	NW_017851633.1	1789.77	0.836849	0.000122819	uncharacterized LOC109533701%2C transcript variant X1
XM_019905709.1	NW_017852070.1	2519.74	0.835739	5.04549e-05	protein Smaug homolog 1
XM_019907520.1	NW_017852103.1	685.566	0.83461	0.000489008	paramyosin-like
XM_019905599.1	NW_017848681.1	463.461	0.834146	0.00124445	retinol dehydrogenase 13-like
XM_019906512.1	NW_017852083.1	3495.62	0.833458	0.0020811	alkaline phosphatase%2C tissue-nonspecific isozyme-like%2C transcript variant X1
XM_019917745.1	NW_017851174.1	8483.91	0.830593	0.00312157	arginase-1
XM_019916049.1	NW_017852380.1	511.607	0.829927	0.0071563	enhancer of split mbeta protein-like
XM_019916633.1	NW_017852745.1	78.3738	0.827793	0.00171396	collagen alpha-2(XI) chain-like
XM_019912431.1	NW_017852305.1	422.901	0.826708	0.000506259	rac GTPase-activating protein 1%2C transcript variant X1
XM_019913783.1	NW_017852342.1	515.367	0.826662	0.00109124	POC1 centriolar protein homolog A-like
XM_019914948.1	NW_017852366.1	37.3428	0.826499	0.00575024	uncharacterized LOC109544638
XM_019909337.1	NW_017849221.1	292.189	0.825125	0.000136681	sodium channel protein 60E-like
XM_019908686.1	NW_017852117.1	385.281	0.822113	0.00397011	transcription factor sox-2
XM_019915381.1	NW_017852371.1	4185.89	0.821333	0.000260967	protein regulator of cytokinesis 1-like%2C transcript variant X1
XM_019903777.1	NW_017852032.1	1260.8	0.821073	8.9972e-11	ATP-dependent Clp protease proteolytic subunit
XM_019908963.1	NW_017852126.1	5179.77	0.820555	0.0058279	uncharacterized LOC109540536
XM_019910984.1	NW_017849449.1	114.408	0.818438	4.32253e-05	RNA-binding protein Musashi homolog Rbp6-like
XM_019912718.1	NW_017852312.1	797.206	0.818159	0.000126093	RE1-silencing transcription factor B-like
XM_019917500.1	NW_017851160.1	96.3277	0.818091	0.000573468	uncharacterized LOC109546521
XM_019902078.1	NW_017851987.1	53.1207	0.81788	4.77692e-05	protein timeless homolog
XM_019915446.1	NW_017845826.1	654.73	0.816882	0.000101673	uncharacterized LOC109544968
XM_019916375.1	NW_017852381.1	126.009	0.816464	1.4823e-06	DNA helicase MCM9-like%2C transcript variant X1
XM_019915736.1	NW_017850281.1	1906.15	0.81623	6.41055e-05	ATP-dependent RNA helicase DBP2-like
XR_002172528.1	NW_017852342.1	384.051	0.816143	5.0182e-05	uncharacterized LOC109543804
XM_019908977.1	NW_017849169.1	9061.07	0.815782	2.21037e-05	ATP-dependent RNA helicase p62-like
XM_019912726.1	NW_017852312.1	710.778	0.815278	1.10567e-05	Y+L amino acid transporter 2%2C transcript variant X1
XM_019898920.1	NW_017851599.1	1163.32	0.813769	0.000239753	39S ribosomal protein L20%2C mitochondrial
XM_019916601.1	NW_017852555.1	59.6606	0.812971	0.00169572	tubulin epsilon chain-like
XM_019917517.1	NW_017851160.1	756.838	0.812867	0.000208272	zinc finger and BTB domain-containing protein 24-like%2C transcript variant X1
XM_019915211.1	NW_017852369.1	214.782	0.811892	0.000366409	zinc transporter ZIP3-like%2C transcript variant X1
XM_019898568.1	NW_017851470.1	374.379	0.81107	4.40916e-06	THAP domain-containing protein 2-like%2C transcript variant X1
XM_019904829.1	NW_017852056.1	2276.77	0.810955	0.00939157	lipoamide acyltransferase component of branched-chain alpha-keto acid dehydrogenase complex%2C mitochondrial%2C transcript variant X1
XM_019908289.1	NW_017852110.1	383.119	0.810867	0.000819084	purine nucleoside phosphorylase-like
XM_019911320.1	NW_017852265.1	401.6	0.810705	2.59248e-05	deoxynucleoside kinase-like
XR_002171663.1	NW_017851775.1	6012.72	0.810427	0.000237226	uncharacterized LOC109534782
XM_019916658.1	NW_017852893.1	192.221	0.80991	0.00113045	protein SDE2 homolog
XM_019900512.1	NW_017851775.1	701.914	0.807804	0.000138324	hydroxysteroid dehydrogenase-like protein 1
XM_019903274.1	NW_017852026.1	26.7698	0.807142	0.00647387	NEDD8-like
XM_019902072.1	NW_017851984.1	792.592	0.807004	0.00559379	neprilysin-1-like
XM_019908219.1	NW_017852110.1	2132.81	0.805785	0.000228852	citron Rho-interacting kinase-like%2C transcript variant X1
XM_019913381.1	NW_017852336.1	2396.23	0.804686	0.00495862	uncharacterized LOC109543588
XM_019916092.1	NW_017852381.1	710.506	0.804557	1.00392e-06	tRNA methyltransferase 10 homolog A%2C transcript variant X1
XM_019903168.1	NW_017847924.1	235.43	0.804228	0.00782644	proclotting enzyme-like
XM_019899225.1	NW_017851651.1	702.191	0.804176	0.000111421	heat shock 70 kDa protein-like%2C transcript variant X1
NW_017852166.1_1751943-1753407	NW_017852166.1	271.623	0.803564	0.00362395	#N/A
XM_019916799.1	NW_017850733.1	33.6644	0.802776	0.000182542	dnaJ homolog subfamily C member 24-like
XM_019917991.1	NW_017846261.1	33.6644	0.802776	0.000182542	dnaJ homolog subfamily C member 24-like
XM_019911663.1	NW_017852286.1	1173.55	0.802628	2.84298e-06	translation factor GUF1 homolog%2C mitochondrial
XM_019913430.1	NW_017852337.1	1160.51	0.802569	0.00396309	uncharacterized LOC109543619
XM_019908687.1	NW_017852117.1	14484.9	0.802531	2.53134e-05	uncharacterized LOC109540339%2C transcript variant X1
XM_019902287.1	NW_017847751.1	235.582	0.802526	0.00798677	proclotting enzyme-like
XM_019910737.1	NW_017852245.1	465.512	0.802283	0.000756892	serine/threonine-protein kinase greatwall
XM_019910821.1	NW_017852245.1	3750.73	0.802234	0.000126039	glycine cleavage system H protein%2C mitochondrial
XM_019902392.1	NW_017852012.1	902.24	0.801425	0.000289886	suppressor protein of bem1/bed5 double mutants-like
XM_019907701.1	NW_017852104.1	840.471	0.801361	1.67438e-05	centrobin%2C transcript variant X1
XM_019915663.1	NW_017852377.1	994.036	0.800018	5.57277e-06	uncharacterized LOC109545149%2C transcript variant X1
XM_019899427.1	NW_017851655.1	549.547	0.799413	0.00268805	gamma-interferon-inducible-lysosomal thiol reductase-like
XM_019902403.1	NW_017852012.1	232.472	0.797855	1.55486e-05	uncharacterized LOC109536268%2C transcript variant X1
XM_019905736.1	NW_017852071.1	384.73	0.797696	0.000318834	carboxy-terminal kinesin 2-like
XM_019917154.1	NW_017851087.1	137.738	0.797603	0.00143323	hexosaminidase D-like
XM_019905926.1	NW_017852073.1	11973.5	0.796001	0.00130214	collagen alpha-5(IV) chain
XM_019912609.1	NW_017852309.1	692.111	0.795107	0.000372164	rho GTPase-activating protein 19
XM_019911482.1	NW_017852269.1	405.041	0.794522	1.64557e-07	mitochondrial inner membrane protease ATP23 homolog
XM_019899316.1	NW_017851651.1	18069.9	0.79306	9.15617e-11	cytokine receptor%2C transcript variant X1
XM_019902991.1	NW_017852017.1	1632.53	0.792958	0.000912918	uncharacterized LOC109536676
XM_019914296.1	NW_017852358.1	2588.05	0.791614	1.18366e-05	flotillin-2%2C transcript variant X1
XM_019910887.1	NW_017852248.1	2365.24	0.791306	0.00682793	putative sodium-dependent multivitamin transporter%2C transcript variant X1
XR_002171855.1	NW_017852017.1	439.587	0.790708	0.00661827	uncharacterized LOC109536604
XM_019905734.1	NW_017852071.1	53.5447	0.787841	0.00375724	uncharacterized LOC109538489
XM_019906739.1	NW_017852087.1	678.363	0.78699	3.81854e-05	protein gone early
XM_019915275.1	NW_017852369.1	312.781	0.786221	0.00720807	paired box protein Pax-8%2C transcript variant X1
XM_019898875.1	NW_017851578.1	105.266	0.786215	0.00872456	uncharacterized LOC109533536%2C transcript variant X1
XM_019917240.1	NW_017851122.1	808.459	0.785724	5.08818e-07	WD repeat-containing protein 46
XM_019898552.1	NW_017851453.1	157.277	0.785665	0.00405273	cytochrome P450 4g15-like
XM_019900466.1	NW_017851775.1	1968.87	0.785146	9.81592e-09	uncharacterized LOC109534711%2C transcript variant X1
XM_019899035.1	NW_017851619.1	1042.19	0.7794	4.78021e-05	uncharacterized LOC109533654
XM_019918068.1	NW_017851187.1	1532.86	0.779363	0.000712778	cyclin-dependent kinases regulatory subunit-like
XM_019917956.1	NW_017851181.1	394.662	0.777121	0.000420233	low-density lipoprotein receptor-related protein 1-like
XM_019902079.1	NW_017851987.1	138.673	0.774102	3.86498e-05	protein timeless homolog
XM_019918261.1	NW_017851223.1	733.611	0.772338	0.00292611	toll-like receptor Tollo
XM_019912353.1	NW_017852302.1	504.347	0.771822	4.00739e-05	ADP-ribosylation factor-like protein 6-interacting protein 4
XM_019903551.1	NW_017852030.1	2348.32	0.771673	0.000158579	macrophage migration inhibitory factor homolog
XM_019898879.1	NW_017851583.1	544.033	0.770409	0.00359544	uncharacterized LOC109533542
XM_019913469.1	NW_017852337.1	431.639	0.768887	0.00099969	decaprenyl-diphosphate synthase subunit 2-like%2C transcript variant X1
XM_019911627.1	NW_017849532.1	201.661	0.768632	0.00281232	kinesin-like protein 2
XM_019904682.1	NW_017852052.1	189.069	0.768443	0.000990377	flocculation protein FLO11-like
NW_017851876.1_c115857-112911	NW_017851876.1	141.435	0.767597	0.0014437	#N/A
XM_019908090.1	NW_017852110.1	970.551	0.766611	1.76419e-05	chymotrypsin-C-like%2C transcript variant X1
XM_019909936.1	NW_017852166.1	474.296	0.766205	0.00112875	F-box/LRR-repeat protein 7-like
XM_019902244.1	NW_017852003.1	497.703	0.765448	0.000163396	spindle pole body component 110-like
XM_019917752.1	NW_017851174.1	141.814	0.765245	0.005171	protein CROWDED NUCLEI 1-like
XM_019907504.1	NW_017852103.1	23344.3	0.763858	0.000847829	mitochondrial enolase superfamily member 1-like
XM_019915795.1	NW_017852380.1	6955.18	0.763573	0.00587813	L-xylulose reductase-like
XM_019916331.1	NW_017852381.1	1601.01	0.761817	0.000519128	uncharacterized LOC109545562%2C transcript variant X1
XM_019915183.1	NW_017852369.1	1223.05	0.761715	0.00183571	uncharacterized LOC109544827%2C transcript variant X1
XM_019907754.1	NW_017852104.1	679.452	0.761374	0.00344506	T-box-containing protein TBX6L-like%2C transcript variant X1
XM_019911758.1	NW_017852296.1	380.577	0.761022	4.59314e-06	GDP-fucose protein O-fucosyltransferase 1%2C transcript variant X1
XM_019910119.1	NW_017852173.1	654.047	0.757951	0.000182298	spindle assembly abnormal protein 6 homolog
XM_019902692.1	NW_017852012.1	534.718	0.757289	8.76631e-08	serine/threonine-protein kinase VRK1-like
XM_019899551.1	NW_017851680.1	214.551	0.756363	0.00490379	uncharacterized LOC109534009
XM_019914757.1	NW_017852366.1	3403.04	0.754874	0.000556844	atypical protein kinase C-like
XM_019916578.1	NW_017852408.1	559.49	0.751838	0.000520489	plexin domain-containing protein 2-like
XM_019915178.1	NW_017852369.1	1296.16	0.750983	1.78632e-07	nardilysin-like%2C transcript variant X1
XM_019898727.1	NW_017851531.1	572.327	0.750464	0.00344334	anillin%2C transcript variant X1
XM_019911498.1	NW_017852270.1	1496.83	0.748513	0.000217646	uncharacterized LOC109542314
XM_019903625.1	NW_017852030.1	6840.91	0.7481	0.00397008	acetyl-CoA carboxylase%2C transcript variant X1
XM_019913317.1	NW_017852336.1	1346.2	0.746821	0.00956495	calcium and integrin-binding protein 1-like
XM_019905402.1	NW_017852064.1	208.851	0.746631	9.69437e-06	PI-PLC X domain-containing protein 3-like%2C transcript variant X1
XM_019910936.1	NW_017852254.1	9649.78	0.746472	0.00146844	glycerol kinase-like%2C transcript variant X1
XM_019916532.1	NW_017852382.1	5132.67	0.745981	0.00284071	aldose reductase-like
XM_019904674.1	NW_017852052.1	414.323	0.744762	0.000118159	zinc finger protein rotund-like%2C transcript variant X1
XM_019917607.1	NW_017851169.1	150.729	0.744755	0.00650179	multidrug resistance-associated protein 4-like
XM_019909700.1	NW_017849275.1	325.416	0.744172	0.00690709	retinol dehydrogenase 13-like
XM_019897797.1	NW_017851239.1	1705.81	0.743051	0.00189275	uncharacterized LOC109532756
XM_019899130.1	NW_017851640.1	1001.7	0.742786	0.00034865	kinesin-like protein KIF11-B
XM_019910922.1	NW_017852254.1	837.714	0.74277	0.000128751	protein MMS22-like
XM_019916173.1	NW_017852381.1	6252.43	0.742686	6.68933e-07	upstream activation factor subunit spp27
XM_019910213.1	NW_017852179.1	599.717	0.741926	3.7342e-06	disheveled-associated activator of morphogenesis 1
XM_019908456.1	NW_017852115.1	1592.72	0.741906	2.41178e-05	serine/threonine-protein kinase haspin-like
XM_019915555.1	NW_017852374.1	1715.19	0.741499	3.22234e-06	exodeoxyribonuclease-like
XM_019907157.1	NW_017852099.1	612.422	0.740808	0.000670118	pro-interleukin-16-like%2C transcript variant X1
XM_019903342.1	NW_017852028.1	759.617	0.739243	0.00373194	2-hydroxyacyl-CoA lyase 1
XM_019916116.1	NW_017852381.1	278.994	0.738769	0.00462389	aminopeptidase M1-A-like%2C transcript variant X1
XM_019903029.1	NW_017852017.1	827.356	0.736048	0.00172703	uncharacterized LOC109536707%2C transcript variant X1
XM_019905117.1	NW_017852058.1	45.4945	0.734574	0.000663894	zinc finger protein 525-like
XM_019909114.1	NW_017852128.1	637.837	0.73434	0.000317349	kinetochore protein NDC80 homolog
XM_019902741.1	NW_017852013.1	702.033	0.733686	2.34965e-06	protein SMG9%2C transcript variant X1
XM_019910723.1	NW_017852245.1	29.6889	0.733148	0.00293934	uncharacterized LOC109541766
XM_019910917.1	NW_017852254.1	5109.53	0.733023	0.00687236	ATP-binding cassette sub-family A member 3-like
XM_019900527.1	NW_017851775.1	1845.75	0.73292	0.000385052	uncharacterized LOC109534753%2C transcript variant X1
XM_019913092.1	NW_017849749.1	131.842	0.73261	0.00299833	uncharacterized protein C19orf52-like
XM_019916233.1	NW_017852381.1	1205.56	0.732606	0.00021627	uncharacterized LOC109545494
XM_019911904.1	NW_017852299.1	775.196	0.732535	0.00295693	retinol dehydrogenase 13-like
XM_019912059.1	NW_017852300.1	1380.79	0.732461	1.69693e-05	flap endonuclease 1
XM_019901577.1	NW_017851926.1	2196.2	0.731788	9.41896e-05	sphingomyelin phosphodiesterase-like
XM_019904144.1	NW_017852037.1	1542.35	0.731188	0.000160013	plexin domain-containing protein 2-like
XM_019914524.1	NW_017852363.1	476.603	0.730567	2.67579e-06	peptidyl-prolyl cis-trans isomerase H
XM_019915010.1	NW_017852366.1	206.972	0.728333	0.000660586	DNA polymerase delta small subunit
XM_019917605.1	NW_017851169.1	529.253	0.727895	0.000129713	multidrug resistance-associated protein 4-like
XM_019914159.1	NW_017852352.1	2180.89	0.727357	0.00563257	uncharacterized LOC109544118
XM_019908542.1	NW_017852116.1	609.843	0.72485	0.00505412	calpain-9-like%2C transcript variant X1
XM_019899433.1	NW_017851656.1	95.4649	0.724532	0.000644069	uncharacterized LOC109533920
XM_019911463.1	NW_017852269.1	1842.84	0.724185	5.48274e-07	protein FAM60A%2C transcript variant X1
XM_019905954.1	NW_017852073.1	1725.89	0.724066	0.000544411	uncharacterized LOC109538632
XM_019903654.1	NW_017852030.1	1699.2	0.722878	4.67526e-07	uncharacterized aarF domain-containing protein kinase 5%2C transcript variant X1
XM_019916197.1	NW_017852381.1	530.928	0.721503	0.000475678	protocadherin-like wing polarity protein stan
XM_019916328.1	NW_017852381.1	2180.68	0.718067	0.000702544	patched domain-containing protein 3%2C transcript variant X1
XM_019905112.1	NW_017852058.1	116.601	0.71755	0.00172432	zinc finger protein 525-like
XM_019904616.1	NW_017852049.1	173.161	0.716166	0.000984081	uncharacterized LOC109537746%2C transcript variant X1
XM_019912643.1	NW_017852311.1	491.187	0.713453	0.00136306	collagen alpha-1(XI) chain-like
XM_019908662.1	NW_017852117.1	741.463	0.712037	0.000616768	uncharacterized LOC109540323
XM_019908475.1	NW_017852115.1	2261.47	0.711507	0.00852986	innexin inx3
XM_019907545.1	NW_017852103.1	558.21	0.710792	1.00392e-06	uncharacterized LOC109539658
XM_019914080.1	NW_017852350.1	514.645	0.710688	0.00803499	DNA replication factor Cdt1-like
XM_019906948.1	NW_017852091.1	797.075	0.710413	0.00520945	single-minded homolog 1
XM_019914468.1	NW_017852363.1	614.228	0.71009	0.00287311	myelin transcription factor 1
XM_019909498.1	NW_017852166.1	276.285	0.709378	0.00129556	uncharacterized LOC109540942%2C transcript variant X1
XM_019897963.1	NW_017851282.1	9892.18	0.708888	0.00041042	epidermal growth factor receptor kinase substrate 8-like protein 2%2C transcript variant X1
XM_019915047.1	NW_017852368.1	460.695	0.708455	2.07589e-06	origin recognition complex subunit 3
XM_019912442.1	NW_017852305.1	375.287	0.707268	0.000124796	sex-lethal homolog%2C transcript variant X1
XM_019905090.1	NW_017852058.1	205.422	0.70669	4.22536e-08	zinc finger protein 37-like
XM_019905084.1	NW_017852058.1	72.2925	0.704795	0.000893693	zinc finger protein OZF-like
XM_019899773.1	NW_017851704.1	2192.93	0.701065	0.00261105	major facilitator superfamily domain-containing protein 9-like%2C transcript variant X1
XM_019913039.1	NW_017852326.1	749.981	0.700235	0.000288168	serine/threonine-protein kinase Aurora-2-like
XM_019910962.1	NW_017852254.1	455.751	0.699857	3.71089e-07	V-type proton ATPase 21 kDa proteolipid subunit%2C transcript variant X1
XM_019911792.1	NW_017849548.1	71.7889	0.697596	0.00244012	protein lethal(2)denticleless-like%2C transcript variant X1
XM_019904956.1	NW_017852056.1	6662.19	0.697168	0.00388083	5-aminolevulinate synthase%2C erythroid-specific%2C mitochondrial
XM_019917912.1	NW_017851181.1	16254.4	0.695433	0.000347135	malate dehydrogenase%2C mitochondrial
XM_019907335.1	NW_017852103.1	321.943	0.695241	0.00147379	UPF0545 protein C22orf39 homolog
XM_019903935.1	NW_017852037.1	429.32	0.694031	3.50178e-07	GPI transamidase component PIG-S
XM_019913911.1	NW_017852348.1	6010.81	0.693629	3.44807e-05	phosphoserine phosphatase
XM_019914168.1	NW_017852353.1	572.151	0.69336	0.000124376	ubiquinone biosynthesis O-methyltransferase%2C mitochondrial%2C transcript variant X1
XM_019914389.1	NW_017852359.1	463.543	0.6933	3.94047e-05	uncharacterized protein C19orf52-like
XM_019899064.1	NW_017851632.1	182.731	0.692229	3.54514e-05	uncharacterized LOC109533687
XM_019913097.1	NW_017852328.1	4195.35	0.691436	2.22766e-05	double-stranded RNA-specific editase Adar%2C transcript variant X1
XM_019906315.1	NW_017852082.1	3294.24	0.691287	0.00019195	uncharacterized LOC109538888
XM_019917449.1	NW_017851153.1	800.775	0.690061	0.000163466	uncharacterized LOC109546472%2C transcript variant X1
XM_019918085.1	NW_017851187.1	732.683	0.689945	0.00505412	uncharacterized LOC109546913%2C transcript variant X1
XM_019910292.1	NW_017852191.1	411.958	0.689557	0.000733423	glutaredoxin domain-containing cysteine-rich protein CG31559-like
XM_019910150.1	NW_017852176.1	260.381	0.688372	0.000824165	uncharacterized LOC109541323%2C transcript variant X1
XM_019917996.1	NW_017851181.1	1148.19	0.688357	3.84783e-06	tubulin gamma-1 chain-like
XM_019899564.1	NW_017851680.1	221.034	0.685636	0.00761564	uncharacterized LOC109534019
XM_019902972.1	NW_017852017.1	4105.53	0.685511	5.33626e-05	superoxide dismutase [Mn] 1%2C mitochondrial
XM_019916050.1	NW_017852380.1	854.537	0.685136	0.00404851	uncharacterized LOC109545386%2C transcript variant X1
XM_019911800.1	NW_017852296.1	1218.41	0.682798	0.000106138	mannose-P-dolichol utilization defect 1 protein homolog%2C transcript variant X1
XM_019912772.1	NW_017852312.1	2275.77	0.68252	7.34947e-05	thioredoxin domain-containing protein 5 homolog
XM_019898066.1	NW_017851282.1	320.453	0.679584	0.00187131	exonuclease 1
XM_019915523.1	NW_017852372.1	408.419	0.679195	0.000111083	mitochondrial import inner membrane translocase subunit Tim9-like
XM_019915591.1	NW_017852375.1	1073.59	0.678558	0.00120956	glycerate kinase
XM_019910220.1	NW_017852180.1	5920.77	0.676668	0.000546776	2-oxoisovalerate dehydrogenase subunit alpha%2C mitochondrial
XM_019905089.1	NW_017852058.1	44.01	0.676401	0.001233	zinc finger protein 883-like
XM_019914814.1	NW_017852366.1	1015.16	0.675332	1.12498e-06	protein wntless
XM_019904300.1	NW_017852037.1	2065.4	0.675294	0.000617962	kinesin-like protein KIF18A%2C transcript variant X1
XM_019913589.1	NW_017852340.1	4193.7	0.67527	0.00351678	phosphoglycerate kinase
XM_019899885.1	NW_017846956.1	473.693	0.673858	0.00506212	neutral and basic amino acid transport protein rBAT-like
XM_019901134.1	NW_017851824.1	473.693	0.673858	0.00506212	neutral and basic amino acid transport protein rBAT-like
XM_019908517.1	NW_017852115.1	1441.78	0.673308	0.000237226	polynucleotide 5'-hydroxyl-kinase NOL9%2C transcript variant X1
XM_019904671.1	NW_017852052.1	1279.97	0.671946	2.64988e-09	116 kDa U5 small nuclear ribonucleoprotein component
XM_019911389.1	NW_017852267.1	1053.37	0.671671	0.00101249	zinc finger homeobox protein 3
XM_019910818.1	NW_017852245.1	311.329	0.671499	0.000178903	uncharacterized LOC109541831
XM_019898741.1	NW_017851531.1	1479.32	0.669012	0.00110604	disks large-associated protein 5%2C transcript variant X1
XM_019911517.1	NW_017852270.1	1496.97	0.667325	0.00281232	lipase member H-A-like
XM_019917146.1	NW_017851087.1	8782.72	0.665326	0.00804891	succinyl-CoA:3-ketoacid coenzyme A transferase 1%2C mitochondrial
XM_019908725.1	NW_017852118.1	342.005	0.664008	0.00057405	RNA-binding protein Musashi homolog 2-like
XM_019916253.1	NW_017852381.1	170.165	0.663755	0.00265754	pancreatic triacylglycerol lipase-like%2C transcript variant X1
XM_019915502.1	NW_017852371.1	1716.24	0.663439	1.81316e-05	UPF0160 protein
XM_019914046.1	NW_017852350.1	621.518	0.663354	0.000234097	nitrogen permease regulator 3-like protein
XM_019903151.1	NW_017852021.1	383.295	0.66114	3.51877e-06	enoyl-CoA hydratase domain-containing protein 3%2C mitochondrial%2C transcript variant X1
XM_019915737.1	NW_017852377.1	250.614	0.659402	0.00795243	protein dead ringer%2C transcript variant X1
XM_019909244.1	NW_017852156.1	11096.9	0.658983	1.21333e-05	6-phosphogluconate dehydrogenase%2C decarboxylating
XM_019903221.1	NW_017852021.1	1103.06	0.658871	0.000326209	NFU1 iron-sulfur cluster scaffold homolog%2C mitochondrial-like
XM_019903632.1	NW_017852030.1	1294.01	0.6583	0.0007783	uncharacterized LOC109537078%2C transcript variant X1
XR_002172168.1	NW_017852115.1	106.526	0.655316	2.02764e-05	uncharacterized LOC109540178
XM_019910770.1	NW_017852245.1	902.407	0.65412	4.78757e-07	uncharacterized LOC109541803%2C transcript variant X1
XM_019907538.1	NW_017852103.1	1879.71	0.654028	0.0001749	cytochrome c-type heme lyase
XM_019915072.1	NW_017852369.1	6711.46	0.653927	0.00031482	ATP-dependent RNA helicase DHX36-like%2C transcript variant X1
XM_019916026.1	NW_017852380.1	419.711	0.653178	0.000274239	M-phase phosphoprotein 6
XM_019915582.1	NW_017852375.1	917.525	0.653083	3.13726e-06	protein-L-isoaspartate(D-aspartate) O-methyltransferase%2C transcript variant X1
XM_019911906.1	NW_017852299.1	1099.37	0.652926	0.00743617	serine/threonine/tyrosine-interacting protein-like%2C transcript variant X1
XM_019902809.1	NW_017852014.1	572.332	0.652634	2.50982e-05	prolyl 4-hydroxylase subunit alpha-1-like
XM_019916231.1	NW_017852381.1	1306.92	0.651962	0.000227422	uncharacterized LOC109545491
XM_019916962.1	NW_017851077.1	1040.92	0.651825	2.41198e-06	protein farnesyltransferase subunit beta%2C transcript variant X1
XM_019900205.1	NW_017851737.1	5547.51	0.650885	0.000309871	ras-specific guanine nucleotide-releasing factor RalGPS1-like%2C transcript variant X1
XR_002172784.1	NW_017851157.1	622.381	0.650884	0.00192126	uncharacterized LOC109546498%2C transcript variant X1
XM_019909709.1	NW_017852166.1	1284.88	0.650448	0.000247228	uncharacterized LOC109541038
XM_019918019.1	NW_017851185.1	738.708	0.649023	0.00766108	aurora kinase B
XM_019899066.1	NW_017851632.1	1117.62	0.647976	6.80594e-07	histone-lysine N-methyltransferase NSD2
XR_002172015.1	NW_017848626.1	86.663	0.647095	0.000798037	uncharacterized LOC109538248
XM_019916272.1	NW_017852381.1	2643.37	0.646899	4.71083e-05	peroxiredoxin-2-like
XM_019913368.1	NW_017852336.1	319.882	0.646788	0.00250285	protein nessun dorma-like
XM_019916435.1	NW_017852382.1	580.747	0.646605	4.94196e-05	glycosaminoglycan xylosylkinase homolog%2C transcript variant X1
XM_019912911.1	NW_017852320.1	1613.08	0.646602	8.10386e-06	uncharacterized LOC109543289%2C transcript variant X1
XM_019908457.1	NW_017852115.1	1229.8	0.646246	0.00160936	UPF0562 protein C7orf55
XM_019904715.1	NW_017852055.1	1213.05	0.646098	0.000238685	uncharacterized LOC109537816%2C transcript variant X1
XM_019912672.1	NW_017852312.1	292.587	0.645107	3.5407e-05	ankyrin repeat%2C SAM and basic leucine zipper domain-containing protein 1
XM_019916696.1	NW_017850552.1	72.4429	0.644874	0.00139165	disheveled-associated activator of morphogenesis 2-like
XM_019914923.1	NW_017852366.1	439.065	0.64474	1.00715e-08	cytosolic endo-beta-N-acetylglucosaminidase
XM_019915763.1	NW_017852380.1	294.24	0.643985	0.000383728	dimethyladenosine transferase 2%2C mitochondrial
XM_019901540.1	NW_017851923.1	24431.3	0.643959	1.04992e-06	putative ATP-dependent RNA helicase me31b%2C transcript variant X1
XM_019905147.1	NW_017848551.1	438.576	0.64345	0.00118336	uncharacterized LOC109538087
XM_019914262.1	NW_017852355.1	667.749	0.643154	6.5943e-07	DNA replication licensing factor Mcm5
XM_019913433.1	NW_017852337.1	317.194	0.642746	1.00206e-05	uncharacterized LOC109543622
XM_019912733.1	NW_017852312.1	445.013	0.641883	0.00068896	poly [ADP-ribose] polymerase 14-like
XM_019902177.1	NW_017852003.1	3947.9	0.641048	0.006748	kinesin-like protein KIN-7L
XM_019917555.1	NW_017851162.1	1346.46	0.63999	1.52178e-06	U3 small nucleolar RNA-associated protein 4 homolog%2C transcript variant X1
XM_019906786.1	NW_017852091.1	710.84	0.637396	0.00185416	uncharacterized LOC109539177%2C transcript variant X1
XM_019907805.1	NW_017852106.1	1048.33	0.637336	1.5352e-05	prolyl 4-hydroxylase subunit alpha-1-like%2C transcript variant X1
XM_019908696.1	NW_017852117.1	1402.48	0.635436	7.9886e-05	elongation factor Ts%2C mitochondrial
XM_019900285.1	NW_017851743.1	800.425	0.634608	0.00291189	gephyrin%2C transcript variant X1
XM_019910569.1	NW_017852239.1	151.047	0.632687	0.00911689	uncharacterized LOC109541671%2C transcript variant X1
XM_019898630.1	NW_017851504.1	951.547	0.631861	0.00249671	RNA-binding protein MEX3B-like
XM_019901345.1	NW_017851860.1	951.147	0.631397	0.00249022	RNA-binding protein MEX3B-like
XM_019905782.1	NW_017848744.1	951.147	0.631397	0.00249022	RNA-binding protein MEX3B-like
XM_019905837.1	NW_017848746.1	951.147	0.631397	0.00249022	RNA-binding protein MEX3B-like
XM_019913680.1	NW_017852342.1	643.24	0.631069	9.2469e-07	exosome complex component RRP46
XM_019914915.1	NW_017852366.1	3648	0.630783	0.00377301	nuclear autoantigenic sperm protein%2C transcript variant X1
XM_019913215.1	NW_017852329.1	784.197	0.630171	0.00642189	peptidoglycan-recognition protein 2-like
XM_019918053.1	NW_017851187.1	840.115	0.629954	1.71871e-05	probable 28S ribosomal protein S16%2C mitochondrial
XM_019908540.1	NW_017852116.1	3729.94	0.629076	0.000966367	H/ACA ribonucleoprotein complex non-core subunit NAF1%2C transcript variant X1
XM_019903501.1	NW_017852030.1	9088.9	0.62801	0.000763463	phosphoglucomutase
XM_019906814.1	NW_017852091.1	1575.45	0.627624	0.000125889	PHD finger protein 19%2C transcript variant X1
XM_019903772.1	NW_017852032.1	972.002	0.627623	2.2749e-05	elongation factor-like GTPase 1%2C transcript variant X1
XM_019903104.1	NW_017852017.1	1106.68	0.627139	0.00166226	innexin inx2-like
XM_019912109.1	NW_017852301.1	1161.25	0.627069	0.000324708	pre-rRNA-processing protein ESF2-like
XM_019908037.1	NW_017852109.1	4100.54	0.626762	0.00164926	stress response protein NST1%2C transcript variant X1
XM_019899668.1	NW_017851694.1	2823.44	0.625898	0.00690709	isopentenyl-diphosphate Delta-isomerase 1
XM_019915318.1	NW_017852369.1	586.054	0.625845	0.00360458	otoferlin-like
XM_019918018.1	NW_017851185.1	343.625	0.62564	5.97234e-05	uncharacterized LOC109546865
XM_019914088.1	NW_017852350.1	363.154	0.625276	8.2596e-05	tRNA (adenine(58)-N(1))-methyltransferase non-catalytic subunit TRM6
XM_019906347.1	NW_017852082.1	1166.99	0.624665	9.60399e-05	28S ribosomal protein S31%2C mitochondrial
XM_019901676.1	NW_017851937.1	755.282	0.622582	1.53152e-05	NADH dehydrogenase [ubiquinone] 1 alpha subcomplex assembly factor 3%2C transcript variant X1
XM_019915242.1	NW_017852369.1	486.381	0.621653	0.00094187	uncharacterized LOC109544861%2C transcript variant X1
XM_019917890.1	NW_017851181.1	315.468	0.621608	0.000156862	zinc finger CCHC-type and RNA-binding motif-containing protein 1-like
XM_019901208.1	NW_017851842.1	473.353	0.621295	0.000330182	tetraspanin-7-like
XM_019908862.1	NW_017852126.1	372.129	0.621202	0.00181815	dystrophin-like
XM_019901974.1	NW_017851955.1	1053.26	0.620648	7.64979e-07	TELO2-interacting protein 1 homolog
XM_019913492.1	NW_017852338.1	316.594	0.620325	0.00241236	LYR motif-containing protein 2
XR_002172637.1	NW_017850264.1	71.7618	0.619443	0.0044361	uncharacterized LOC109545080
XM_019901475.1	NW_017851907.1	2647.98	0.619225	1.99063e-06	replication protein A 70 kDa DNA-binding subunit-like
XM_019906965.1	NW_017852093.1	991.016	0.618349	0.00025199	collagen alpha chain CG42342-like%2C transcript variant X1
XM_019901504.1	NW_017851913.1	504.09	0.618334	9.01586e-06	tRNA (adenine(58)-N(1))-methyltransferase catalytic subunit TRMT61A-like
XM_019912325.1	NW_017852302.1	1834.68	0.61617	0.00119628	protein prenyltransferase alpha subunit repeat-containing protein 1
XM_019917381.1	NW_017851142.1	761.516	0.614559	9.59296e-10	uncharacterized LOC109546422
XM_019913429.1	NW_017849817.1	329.254	0.613845	4.71113e-05	tRNA (adenine(58)-N(1))-methyltransferase catalytic subunit TRMT61A-like
XM_019917297.1	NW_017851136.1	1065.24	0.613408	3.86498e-05	cleavage and polyadenylation specificity factor subunit 1%2C transcript variant X1
XM_019905407.1	NW_017852064.1	8648.13	0.612751	1.00206e-05	GMP synthase [glutamine-hydrolyzing]%2C transcript variant X1
XM_019901944.1	NW_017851949.1	291.705	0.612693	0.000416224	probable RNA helicase armi
XM_019909252.1	NW_017852156.1	2360.8	0.612258	1.87984e-05	serine/threonine-protein kinase OSR1%2C transcript variant X1
XM_019907065.1	NW_017852096.1	1552.4	0.612094	1.12418e-07	uncharacterized LOC109539367
XM_019916221.1	NW_017852381.1	1684.85	0.611009	1.29558e-07	histone RNA hairpin-binding protein
XM_019902436.1	NW_017852012.1	3940.73	0.608603	0.00310301	nucleolin 1-like
XM_019902259.1	NW_017852003.1	490.768	0.608568	0.000366409	condensin complex subunit 3-like
XM_019900064.1	NW_017851724.1	1285.05	0.608238	0.00788924	protein abnormal spindle-like
XM_019897778.1	NW_017851239.1	869.962	0.607154	3.74964e-06	poly(A) RNA polymerase%2C mitochondrial
XM_019905086.1	NW_017852058.1	120.067	0.607015	0.000155569	zinc finger protein 184-like
XM_019901598.1	NW_017851928.1	887.606	0.606668	0.00376495	sodium/hydrogen exchanger 9B1-like%2C transcript variant X1
XM_019907053.1	NW_017852096.1	528.105	0.605456	0.000484254	RNA-binding protein 40
XM_019900097.1	NW_017851729.1	898.561	0.604039	3.7162e-06	TELO2-interacting protein 1 homolog%2C transcript variant X1
XM_019915353.1	NW_017852370.1	1519.1	0.60157	0.00346808	uncharacterized LOC109544931%2C transcript variant X1
XM_019909092.1	NW_017852128.1	963.929	0.601532	4.30226e-05	mitochondrial tRNA-specific 2-thiouridylase 1%2C transcript variant X1
XM_019907015.1	NW_017852096.1	678.624	0.601515	0.00748134	dnaJ homolog subfamily C member 22
XM_019897904.1	NW_017845006.1	1677.89	0.600962	8.348e-07	acylglycerol kinase%2C mitochondrial
XM_019918045.1	NW_017851187.1	4595.27	0.600432	7.59579e-05	chromosome-associated kinesin KIF4%2C transcript variant X1
XM_019912842.1	NW_017852313.1	4355.15	0.600357	0.0003382	putative tricarboxylate transport protein%2C mitochondrial%2C transcript variant X1
XM_019899568.1	NW_017845104.1	373.781	0.60025	0.000165516	deoxycytidylate deaminase
XM_019905260.1	NW_017852060.1	11601.3	0.599927	0.00427049	prostaglandin reductase 1-like
XM_019914093.1	NW_017852350.1	751.04	0.599464	2.37806e-06	WW domain-containing oxidoreductase
XM_019898375.1	NW_017851403.1	1003.73	0.598819	0.000311931	condensin complex subunit 1
XM_019914360.1	NW_017852358.1	389.604	0.598582	8.66111e-05	ankyrin repeat domain-containing protein 49-like%2C transcript variant X1
XM_019899663.1	NW_017851694.1	1326.36	0.598116	1.08007e-06	39S ribosomal protein L37%2C mitochondrial
XM_019913634.1	NW_017852340.1	1859.76	0.597128	1.35183e-05	histone-lysine N-methyltransferase pr-set7
XM_019902286.1	NW_017852003.1	924.061	0.596399	7.16842e-05	threonylcarbamoyladenosine tRNA methylthiotransferase%2C transcript variant X1
XM_019907734.1	NW_017852104.1	1671.2	0.59621	0.00255228	aminopeptidase N-like
XM_019902768.1	NW_017847848.1	873.312	0.595806	3.86498e-05	DNA replication licensing factor Mcm7-like
XM_019905679.1	NW_017852068.1	873.312	0.595806	3.86498e-05	DNA replication licensing factor Mcm7-like
XM_019910361.1	NW_017852201.1	1652.34	0.594963	0.000972468	cell division cycle protein 20 homolog
XM_019903366.1	NW_017852028.1	8732.75	0.594753	0.000358362	protein gustavus%2C transcript variant X1
XM_019901306.1	NW_017851859.1	6575.79	0.594369	2.87194e-05	pyruvate dehydrogenase E1 component subunit alpha%2C mitochondrial-like%2C transcript variant X1
XM_019903917.1	NW_017852037.1	1642.73	0.593641	0.000926908	uncharacterized LOC109537282%2C transcript variant X1
XM_019915250.1	NW_017852369.1	3717.41	0.59334	0.000217227	monoacylglycerol lipase ABHD12-like%2C transcript variant X1
XM_019900363.1	NW_017851758.1	2212.68	0.592803	2.34468e-14	cystathionine beta-synthase%2C transcript variant X1
XM_019906683.1	NW_017852086.1	678.582	0.592573	0.00989195	lymphokine-activated killer T-cell-originated protein kinase
XR_002172561.1	NW_017852359.1	1920.63	0.588154	8.28267e-06	uncharacterized LOC109544319
XM_019908212.1	NW_017852110.1	332.976	0.588085	0.0048487	uncharacterized LOC109540053%2C transcript variant X1
XM_019908751.1	NW_017852121.1	324.723	0.587138	0.00788131	DNA replication ATP-dependent helicase/nuclease DNA2
XM_019905109.1	NW_017852058.1	57.8133	0.58611	0.00081265	zinc finger protein 62-like
XM_019906686.1	NW_017852086.1	7506.53	0.584243	9.04385e-07	proteasome activator complex subunit 3%2C transcript variant X1
XM_019908376.1	NW_017852115.1	3014.67	0.583275	0.000184004	uncharacterized LOC109540156
XM_019912407.1	NW_017852305.1	1860.99	0.58121	0.00157811	UBA-like domain-containing protein 2
XM_019901552.1	NW_017851924.1	689.437	0.581164	1.94865e-06	uncharacterized LOC109535627
XM_019908294.1	NW_017849039.1	627.454	0.580147	0.00110371	tetraspanin-7-like%2C transcript variant X1
XM_019910206.1	NW_017852178.1	534.41	0.579439	0.000386137	uncharacterized LOC109541353
XM_019915159.1	NW_017852369.1	515.554	0.578038	0.00791765	uncharacterized LOC109544807
XM_019907610.1	NW_017852104.1	928.939	0.577367	0.000334709	coiled-coil domain-containing protein 58
XM_019918174.1	NW_017851204.1	761.816	0.576407	9.4343e-06	cytochrome c oxidase assembly factor 5
XM_019914763.1	NW_017852366.1	2485.22	0.575708	2.70225e-05	ribosomal L1 domain-containing protein 1-like
XM_019916313.1	NW_017850408.1	288.026	0.57507	6.96095e-05	mitochondrial inner membrane protease subunit 1-like
XM_019915396.1	NW_017852371.1	3186.95	0.573669	0.000124424	serine-arginine protein 55-like
XM_019898632.1	NW_017851505.1	2559.27	0.572229	6.51967e-05	ecdysone 20-monooxygenase%2C transcript variant X1
XM_019911244.1	NW_017852263.1	11715	0.571873	0.00124445	eukaryotic translation initiation factor 4E transporter-like%2C transcript variant X1
XM_019908632.1	NW_017852117.1	1893.25	0.571775	0.000665851	E3 ubiquitin-protein ligase complex SLX5-SLX8 subunit SLX8-like%2C transcript variant X1
XM_019907093.1	NW_017852096.1	733.125	0.571208	0.000118159	ankyrin repeat domain-containing protein SOWAHC%2C transcript variant X1
XM_019898245.1	NW_017851375.1	742.028	0.570971	0.00162624	uncharacterized protein C7orf50 homolog
XM_019901207.1	NW_017851841.1	257.302	0.570324	0.00861874	uncharacterized LOC109535320
XM_019912397.1	NW_017849649.1	257.662	0.56961	0.00885599	uncharacterized LOC109542933
XM_019900232.1	NW_017851737.1	1505.82	0.568948	0.00446087	inactive peptidyl-prolyl cis-trans isomerase shutdown
XM_019902296.1	NW_017852003.1	914.975	0.568549	0.00462175	borealin%2C transcript variant X1
XM_019902677.1	NW_017852012.1	2244.83	0.568172	0.000191505	protein NEDD1%2C transcript variant X1
XM_019916790.1	NW_017850717.1	263.26	0.567453	0.00799745	uncharacterized LOC109545945
XM_019905375.1	NW_017852064.1	407.374	0.566681	0.000820517	diphthine methyltransferase
XM_019915181.1	NW_017852369.1	543.482	0.565365	3.19586e-06	CWF19-like protein 2 homolog
XM_019907330.1	NW_017852103.1	1282.43	0.564714	0.00187679	uncharacterized LOC109539537%2C transcript variant X1
XR_002172388.1	NW_017849443.1	125.895	0.564698	0.00179099	uncharacterized LOC109541938
XM_019898395.1	NW_017851403.1	1059.26	0.564447	0.00116834	uncharacterized LOC109533145%2C transcript variant X1
XM_019899117.1	NW_017851637.1	916.283	0.564065	0.00152463	apoptosis-stimulating of p53 protein 2-like
XM_019902667.1	NW_017852012.1	1903.56	0.563191	0.000536169	DNA repair protein RAD51 homolog 1
XM_019911910.1	NW_017852300.1	305.65	0.561542	0.00102504	iron-sulfur cluster assembly 2 homolog%2C mitochondrial
XM_019905706.1	NW_017852070.1	980.766	0.56151	0.00910422	polyamine-modulated factor 1-binding protein 1-like
XM_019910795.1	NW_017852245.1	1556.72	0.560207	9.26283e-05	retinol dehydrogenase 11-like
XM_019914913.1	NW_017852366.1	6525.04	0.560066	1.52311e-06	eukaryotic translation initiation factor 3 subunit D%2C transcript variant X1
XM_019915630.1	NW_017852377.1	774.886	0.55966	5.54405e-05	WD repeat-containing protein 89%2C transcript variant X1
XR_002172607.1	NW_017852369.1	348.806	0.559641	0.00460851	uncharacterized LOC109544769%2C transcript variant X1
XM_019910525.1	NW_017852235.1	1050.5	0.559443	5.45775e-08	protein maelstrom 1
XM_019902876.1	NW_017852016.1	695.515	0.558902	0.000851832	centromere/kinetochore protein zw10-like
XM_019917858.1	NW_017851174.1	1783.35	0.558483	0.000120074	FACT complex subunit Ssrp1
XM_019899455.1	NW_017851662.1	1183.73	0.55815	6.18775e-07	single-stranded DNA-binding protein%2C mitochondrial-like
XM_019910777.1	NW_017852245.1	565.81	0.556696	6.50178e-05	uncharacterized LOC109541809%2C transcript variant X1
XM_019915411.1	NW_017852371.1	773.443	0.556652	0.000829814	zinc finger protein 16-like
XM_019916821.1	NW_017850781.1	877.504	0.555943	0.00466625	apoptosis-stimulating of p53 protein 2-like
XM_019905833.1	NW_017852073.1	952.519	0.55484	0.000533242	H/ACA ribonucleoprotein complex subunit 2-like protein
XM_019916470.1	NW_017852382.1	1886.57	0.554668	0.00158309	probable ubiquitin-conjugating enzyme E2 C
XM_019917010.1	NW_017851084.1	397.025	0.554645	0.00674034	protein ARV1
XM_019904734.1	NW_017852055.1	780.539	0.554006	9.52206e-06	erlin-1-like
XM_019898747.1	NW_017851531.1	842.366	0.553443	1.00206e-05	mitochondrial import inner membrane translocase subunit Tim22
XM_019916280.1	NW_017852381.1	518.47	0.553333	0.000396804	copper homeostasis protein cutC homolog
XM_019899775.1	NW_017851704.1	457.846	0.552905	0.00218678	protein PET100 homolog%2C mitochondrial
XM_019916820.1	NW_017850780.1	1049.37	0.552049	0.00391641	apoptosis-stimulating of p53 protein 2-like
XM_019905691.1	NW_017852068.1	597.264	0.55116	4.71113e-05	uncharacterized LOC109538449%2C transcript variant X1
XM_019900082.1	NW_017851724.1	1286.89	0.550563	0.000300928	surfeit locus protein 1
XM_019916995.1	NW_017851084.1	651.857	0.549992	0.000285624	exosome complex component RRP4
XM_019899247.1	NW_017851651.1	5500.81	0.549509	0.00804992	glucose-6-phosphate 1-dehydrogenase%2C transcript variant X1
XM_019917202.1	NW_017851087.1	1375.73	0.548985	0.0027541	U3 small nucleolar RNA-interacting protein 2
XM_019900299.1	NW_017851748.1	625.502	0.548801	0.00178838	PCI domain-containing protein 2 homolog
XM_019910877.1	NW_017852247.1	2358.67	0.547326	0.005171	glucose 1-dehydrogenase-like
XM_019908554.1	NW_017852117.1	287.322	0.546751	0.00864202	maf-like protein Amet_2288
XR_002172772.1	NW_017851137.1	92.5211	0.546464	0.00509232	uncharacterized LOC109546390
XM_019912744.1	NW_017852312.1	1489.75	0.546314	0.00307367	2-acylglycerol O-acyltransferase 1-like%2C transcript variant X1
XM_019908982.1	NW_017852126.1	269.023	0.545146	0.00114334	growth arrest-specific protein 1-like%2C transcript variant X1
XM_019902900.1	NW_017852017.1	395.827	0.544602	5.98795e-05	nucleoside diphosphate-linked moiety X motif 8
XM_019900862.1	NW_017851820.1	1121.26	0.543263	0.00282288	OTU domain-containing protein 6B
XM_019913526.1	NW_017852339.1	374.126	0.543204	0.00010294	mitochondrial inner membrane protease subunit 1-like
XM_019899794.1	NW_017851704.1	2209.1	0.542727	5.1987e-09	J domain-containing protein CG6693
XM_019914353.1	NW_017852358.1	445.548	0.540593	0.000124376	diphthamide biosynthesis protein 1%2C transcript variant X1
XM_019907858.1	NW_017852107.1	3293.47	0.538508	0.000548839	neuroguidin
XM_019904987.1	NW_017852056.1	764.533	0.538064	0.000773453	protein patched
XM_019917524.1	NW_017851160.1	3953.84	0.537353	0.000326209	importin subunit alpha-1-like
XM_019908374.1	NW_017852115.1	2368.77	0.537244	0.0011278	uncharacterized LOC109540154
XM_019914731.1	NW_017852366.1	783.5	0.537134	0.00076569	gastrula zinc finger protein XlCGF49.1-like
XM_019914955.1	NW_017852366.1	1960.87	0.536686	0.000112564	transcription factor A%2C mitochondrial-like
XM_019901108.1	NW_017851824.1	376.492	0.536556	1.00206e-05	methionine--tRNA ligase%2C mitochondrial
XM_019898017.1	NW_017851282.1	3592.82	0.53649	0.00234204	5'-nucleotidase domain-containing protein 3%2C transcript variant X1
XM_019905992.1	NW_017852073.1	489.345	0.536418	0.000617674	phosphatidylinositol N-acetylglucosaminyltransferase subunit C
XM_019916189.1	NW_017852381.1	1296.13	0.53636	4.59314e-06	G protein-coupled receptor kinase 2%2C transcript variant X1
XM_019905116.1	NW_017852058.1	93.563	0.535684	0.000228896	oocyte zinc finger protein XlCOF19-like
XM_019911274.1	NW_017852264.1	1101.99	0.535455	4.107e-05	YEATS domain-containing protein 4%2C transcript variant X1
XM_019902624.1	NW_017852012.1	416.684	0.535297	4.13017e-05	dnaJ homolog subfamily C member 17
XM_019908728.1	NW_017852118.1	289.763	0.534958	0.000881839	5-demethoxyubiquinone hydroxylase%2C mitochondrial%2C transcript variant X1
XM_019911107.1	NW_017852258.1	1236.89	0.534363	9.4086e-07	probable small nuclear ribonucleoprotein G
XM_019904342.1	NW_017852038.1	2607.74	0.533946	0.00764048	uncharacterized LOC109537562
XM_019897741.1	NW_017851239.1	1052.09	0.533742	0.00864434	metaxin-2-like
XM_019901386.1	NW_017851876.1	446.202	0.533507	0.000196015	centrosomal protein of 135 kDa-like
XM_019914857.1	NW_017852366.1	1135.02	0.533115	0.00107152	1-acyl-sn-glycerol-3-phosphate acyltransferase alpha
XM_019911424.1	NW_017852269.1	363.976	0.533073	0.000124424	mismatch repair endonuclease PMS2
XM_019909217.1	NW_017852154.1	4683.79	0.532987	0.00602448	galectin-8-like%2C transcript variant X1
XM_019914808.1	NW_017852366.1	2171.45	0.531918	0.00300436	rho GTPase-activating protein 20-like%2C transcript variant X1
XM_019898423.1	NW_017851422.1	980.993	0.53145	0.00165982	protein lethal(2)denticleless-like
XM_019917741.1	NW_017851174.1	1894.4	0.529999	6.41414e-05	cytochrome P450 302a1%2C mitochondrial-like
XM_019908312.1	NW_017852111.1	2486.67	0.529916	0.000756381	fork-head transcriptional regulator FHL1-like
XM_019915117.1	NW_017852369.1	2648.75	0.529625	0.00427797	NHP2-like protein 1 homolog
XM_019907695.1	NW_017852104.1	1009.59	0.529383	2.27225e-06	ATP-dependent RNA helicase SUV3 homolog%2C mitochondrial%2C transcript variant X1
XM_019911690.1	NW_017852287.1	385.009	0.528851	0.00941049	origin recognition complex subunit 4%2C transcript variant X1
XM_019911056.1	NW_017849455.1	1800.43	0.528764	0.00401401	probable nucleoporin Nup58
XM_019914201.1	NW_017852355.1	337.464	0.528267	0.00116488	DNA polymerase epsilon subunit 2
XM_019899571.1	NW_017851683.1	3564.25	0.528035	0.000378737	glutathione S-transferase 1-like%2C transcript variant X1
XM_019904612.1	NW_017852049.1	3129.56	0.527164	0.00921706	dnaJ homolog subfamily C member 8
XM_019916315.1	NW_017852381.1	428.23	0.526995	0.000307494	cell cycle checkpoint control protein RAD9A-like
XM_019908406.1	NW_017852115.1	1854.76	0.526445	0.000464642	uncharacterized LOC109540174%2C transcript variant X1
XM_019911640.1	NW_017852279.1	675.197	0.526184	2.96587e-05	uncharacterized LOC109542416%2C transcript variant X1
XM_019905107.1	NW_017852058.1	90.934	0.526125	0.00893729	zinc finger protein OZF-like
XM_019917173.1	NW_017851087.1	563.101	0.526105	0.00846181	methionine synthase reductase-like
XM_019913676.1	NW_017852342.1	796.52	0.525658	1.08435e-06	BRCA1-associated RING domain protein 1-like
XM_019899393.1	NW_017851651.1	4000.81	0.52415	0.000541752	cytochrome c oxidase subunit 5A%2C mitochondrial-like
XM_019898320.1	NW_017851382.1	662.743	0.523609	0.00495862	uncharacterized LOC109533090
XM_019899479.1	NW_017851666.1	852.452	0.523204	0.00892247	condensin complex subunit 2%2C transcript variant X1
XM_019911980.1	NW_017852300.1	448.989	0.522484	1.57321e-05	cyclin-H
XM_019913419.1	NW_017852337.1	485.896	0.521114	5.44151e-08	pre-mRNA-splicing factor SPF27
XM_019900746.1	NW_017851813.1	1810.35	0.520702	0.00455913	probable nucleoporin Nup58%2C transcript variant X1
XM_019915661.1	NW_017852377.1	1709.84	0.52023	0.000415855	probable ATP-dependent RNA helicase Dbp73D
XM_019906460.1	NW_017852083.1	560.517	0.520171	0.00463991	tRNA (cytosine-5-)-methyltransferase%2C transcript variant X1
XM_019901433.1	NW_017851888.1	632.322	0.519697	0.00657767	CD151 antigen-like
NW_017847275.1_1312-2163	NW_017847275.1	100.11	0.519631	0.00112039	#N/A
XM_019901398.1	NW_017851876.1	2327.87	0.51888	0.00121379	zinc finger CCCH domain-containing protein 11A-like
XM_019897755.1	NW_017851239.1	1452.09	0.51882	0.000772571	protein prune homolog 2
XM_019907889.1	NW_017852107.1	2429.96	0.518609	5.14521e-06	SUN domain-containing ossification factor
XM_019914340.1	NW_017852358.1	2827.12	0.51772	0.0071563	ecto-NOX disulfide-thiol exchanger 2
XM_019912044.1	NW_017852300.1	1278.19	0.517667	3.94047e-05	protein will die slowly
XM_019900797.1	NW_017851815.1	226.718	0.517655	0.00228084	apoptosis-stimulating of p53 protein 2-like
XM_019900795.1	NW_017851815.1	231.584	0.517408	0.00259933	apoptosis-stimulating of p53 protein 2-like
XM_019905096.1	NW_017852058.1	1105.6	0.517089	0.000406583	protein arginine N-methyltransferase 7%2C transcript variant X1
XM_019911089.1	NW_017852258.1	1964.73	0.516392	2.66704e-05	sorting nexin-7-like
XM_019900516.1	NW_017851775.1	966.923	0.516347	0.00117586	rRNA methyltransferase 3%2C mitochondrial
XM_019915197.1	NW_017852369.1	1474.6	0.515537	0.0048487	serine/threonine-protein kinase VRK1-like
XM_019916860.1	NW_017850846.1	532.087	0.5152	0.000117855	uncharacterized LOC109546024
XM_019906710.1	NW_017852086.1	7080.81	0.515137	0.000127233	cyclic AMP-dependent transcription factor ATF-1
XM_019908755.1	NW_017852121.1	1368.01	0.51456	1.29617e-05	39S ribosomal protein L19%2C mitochondrial
XM_019912227.1	NW_017852302.1	674.393	0.514118	0.00350949	cytochrome c oxidase assembly protein COX15 homolog%2C transcript variant X1
XM_019912593.1	NW_017852308.1	664.113	0.513833	0.000708001	uncharacterized LOC109543071
XM_019916751.1	NW_017850658.1	405.223	0.512356	0.000318609	DNA polymerase delta catalytic subunit-like
XM_019902304.1	NW_017852003.1	712.861	0.512151	0.00245695	DNA-directed RNA polymerase III subunit RPC8
XM_019905694.1	NW_017852068.1	1305.26	0.512108	0.000966216	nucleoporin NDC1
XM_019902437.1	NW_017852012.1	3178.58	0.511711	0.00235222	transcription initiation factor TFIID subunit 11-like
XM_019912872.1	NW_017852315.1	2896.96	0.511031	0.00106141	calcium-transporting ATPase type 2C member 1
XM_019902867.1	NW_017852016.1	1320.34	0.510866	1.63988e-07	39S ribosomal protein L51%2C mitochondrial
XM_019903581.1	NW_017852030.1	2018.6	0.510817	0.00142057	39S ribosomal protein L12%2C mitochondrial
XM_019899382.1	NW_017851651.1	1071.19	0.510344	0.00243646	putative GTP-binding protein 6%2C transcript variant X1
XM_019909164.1	NW_017852139.1	1596.97	0.510224	3.56283e-05	protein mago nashi
XM_019904982.1	NW_017852056.1	1431.27	0.505557	0.00514447	battenin%2C transcript variant X1
XM_019912995.1	NW_017852320.1	5608.4	0.505224	6.42726e-06	mitochondrial import receptor subunit TOM20 homolog B-like
XM_019914221.1	NW_017852355.1	6992.61	0.5048	1.06903e-10	microtubule-associated protein RP/EB family member 1%2C transcript variant X1
XM_019916228.1	NW_017852381.1	839.62	0.504213	7.44848e-05	tRNA-splicing ligase RtcB homolog
XM_019900063.1	NW_017851724.1	1381.87	0.503894	0.00019323	transmembrane protein 70 homolog%2C mitochondrial
XM_019912158.1	NW_017852302.1	1241.65	0.503687	0.00116044	modifier of mdg4-like%2C transcript variant X1
XM_019899143.1	NW_017851644.1	829.138	0.503096	0.0066174	putative glutathione-specific gamma-glutamylcyclotransferase 2
XM_019898011.1	NW_017851282.1	1708.65	0.500735	5.3289e-06	putative tyrosine-protein kinase Wsck%2C transcript variant X1
XM_019908477.1	NW_017852115.1	2668.84	0.500541	0.00144242	SUMO-conjugating enzyme UBC9-B
XM_019905088.1	NW_017852058.1	100.415	0.499198	0.00571323	zinc finger protein 678-like
XM_019905945.1	NW_017852073.1	106424	0.499091	0.000237226	Y-box factor homolog%2C transcript variant X1
XM_019900021.1	NW_017851724.1	963.293	0.498995	8.32361e-05	WASH complex subunit strumpellin%2C transcript variant X1
XM_019917579.1	NW_017851165.1	5455.58	0.498562	0.000151009	ubiquitin-conjugating enzyme E2-24 kDa%2C transcript variant X1
XM_019915710.1	NW_017852377.1	587.061	0.498486	0.000445259	leucine-rich repeat protein 1
XM_019913269.1	NW_017852336.1	502.545	0.497792	6.90262e-06	cysteine-rich protein 2-binding protein%2C transcript variant X1
XM_019911631.1	NW_017852279.1	1363.09	0.497498	0.00157155	nuclear pore complex protein Nup93-like
XM_019901566.1	NW_017851926.1	1491.02	0.49691	0.00940945	SH3 and multiple ankyrin repeat domains protein 3-like
XM_019907793.1	NW_017852106.1	832.708	0.49686	0.000114017	uncharacterized LOC109539802
XM_019902961.1	NW_017852017.1	689.957	0.496225	0.00100037	caseinolytic peptidase B protein homolog%2C transcript variant X1
XM_019902203.1	NW_017852003.1	554.857	0.496211	0.00274298	ribonuclease H2 subunit C
XM_019913050.1	NW_017852326.1	2435.18	0.495133	2.50982e-05	mitochondrial inner membrane protein OXA1L%2C transcript variant X1
XM_019916810.1	NW_017850761.1	2369.65	0.493808	0.000317401	eukaryotic translation initiation factor 3 subunit K-like
XM_019907028.1	NW_017852096.1	841.036	0.493632	0.0021286	28S ribosomal protein S9%2C mitochondrial
XM_019907422.1	NW_017852103.1	900.568	0.493166	1.26536e-08	pre-mRNA-splicing factor ISY1 homolog
XM_019907321.1	NW_017848930.1	272.983	0.492374	0.00224743	DNA polymerase delta catalytic subunit-like
XM_019913745.1	NW_017852342.1	3008.23	0.490618	8.32361e-05	polycomb group protein FERTILIZATION-INDEPENDENT SEED 2-like%2C transcript variant X1
XM_019916454.1	NW_017852382.1	691.161	0.49029	0.00202637	probable cardiolipin synthase (CMP-forming)
XM_019902261.1	NW_017852003.1	1375.73	0.490167	0.000290445	proteasome assembly chaperone 2
XM_019898506.1	NW_017851452.1	917.635	0.490079	0.000364372	mediator of RNA polymerase II transcription subunit 22
XM_019902339.1	NW_017852009.1	887.887	0.489139	0.000286263	uncharacterized LOC109536224
XM_019905083.1	NW_017852058.1	114.799	0.489013	0.00178149	zinc finger protein 878-like
XM_019915008.1	NW_017852366.1	966.558	0.488631	1.70317e-05	U6 snRNA-associated Sm-like protein LSm3
XM_019905672.1	NW_017852068.1	701.542	0.488441	0.000335354	peptidyl-prolyl cis-trans isomerase-like 3%2C transcript variant X1
XM_019899118.1	NW_017851637.1	2078.03	0.488035	6.90262e-06	vacuolar ATPase assembly integral membrane protein VMA21 homolog
XM_019907496.1	NW_017848934.1	790.894	0.487448	0.00778652	39S ribosomal protein L14%2C mitochondrial
XM_019915758.1	NW_017852380.1	600.807	0.487063	0.00809419	unconventional myosin-VIIa-like
XM_019906546.1	NW_017852085.1	2069.33	0.485524	0.0002743	NFX1-type zinc finger-containing protein 1-like
XM_019918262.1	NW_017851223.1	600.689	0.485304	0.000490376	lysine-specific histone demethylase 1A%2C transcript variant X1
XM_019899473.1	NW_017846850.1	156.591	0.485241	0.00359905	zinc finger protein OZF-like
XM_019915825.1	NW_017852380.1	1626.53	0.48517	0.00620918	protein BUD31 homolog
XM_019909046.1	NW_017852128.1	845.186	0.484549	0.00624459	mitochondrial GTPase 1
XM_019900626.1	NW_017851783.1	2273.16	0.484502	0.000210842	cyclin-related protein FAM58A
XM_019907741.1	NW_017852104.1	1836.07	0.483397	0.00399921	NADH dehydrogenase [ubiquinone] 1 beta subcomplex subunit 7
XM_019917227.1	NW_017851115.1	5910.94	0.483342	7.5087e-06	transcription factor Dp-1%2C transcript variant X1
XM_019899395.1	NW_017851651.1	585.347	0.483069	0.00736523	mono [ADP-ribose] polymerase PARP16-like%2C transcript variant X1
XM_019915116.1	NW_017852369.1	1043.28	0.482987	0.00147101	uncharacterized protein C16orf52 homolog A
XM_019898733.1	NW_017851531.1	1800.4	0.482454	0.00135061	uncharacterized LOC109533418
XM_019900474.1	NW_017851775.1	2590.06	0.481644	1.04173e-05	probable RNA polymerase II nuclear localization protein SLC7A6OS
XM_019905923.1	NW_017852073.1	1264.7	0.480121	0.000402331	probable 28S ribosomal protein S25%2C mitochondrial%2C transcript variant X1
XM_019902653.1	NW_017852012.1	115.387	0.480079	0.000269575	uncharacterized LOC109536437
XM_019914138.1	NW_017852350.1	846.776	0.480076	4.18519e-06	nuclear pore complex protein Nup88
XM_019917248.1	NW_017851125.1	651.879	0.479736	0.000171105	SET and MYND domain-containing protein 5
XM_019900816.1	NW_017851816.1	1715.89	0.479637	0.00206422	surfeit locus protein 6 homolog
XM_019902555.1	NW_017852012.1	671.846	0.479471	0.000259172	nucleoporin seh1
XR_002172288.1	NW_017852168.1	5621.18	0.478967	0.00293289	alpha-aminoadipic semialdehyde dehydrogenase%2C transcript variant X1
XM_019907107.1	NW_017852096.1	1375.25	0.47889	0.00629238	enoyl-CoA delta isomerase 2%2C mitochondrial
XM_019901776.1	NW_017851937.1	3735.98	0.477293	0.00106761	sodium/potassium-transporting ATPase subunit beta-1-like
XM_019916250.1	NW_017852381.1	889.276	0.476288	0.00183117	probable receptor-like protein kinase At5g18500
XM_019913421.1	NW_017852337.1	1266.02	0.475656	0.00120798	small nuclear ribonucleoprotein F
XM_019900060.1	NW_017851724.1	3365.43	0.475022	9.26991e-09	NADH dehydrogenase [ubiquinone] 1 alpha subcomplex assembly factor 8-like%2C transcript variant X1
XM_019907393.1	NW_017852103.1	3876.69	0.474664	0.000431029	RNA-binding protein cabeza-like%2C transcript variant X1
XM_019898999.1	NW_017851612.1	5225.76	0.474539	0.000218757	troponin C-like
XM_019906924.1	NW_017852091.1	109.95	0.474532	0.00874035	zinc finger protein 239-like
XM_019900381.1	NW_017851760.1	1990.01	0.474413	0.00192865	acyl-CoA dehydrogenase family member 9%2C mitochondrial
XM_019906522.1	NW_017852083.1	798.132	0.474052	5.91849e-05	uncharacterized LOC109539013
XM_019905206.1	NW_017852058.1	724.01	0.474039	6.42726e-06	tctex1 domain-containing protein 2-like
XM_019902685.1	NW_017852012.1	904.61	0.473974	6.55126e-05	nuclear transcription factor Y subunit gamma%2C transcript variant X1
XM_019906286.1	NW_017852082.1	2968.59	0.473749	0.00151468	NADH dehydrogenase [ubiquinone] flavoprotein 2%2C mitochondrial%2C transcript variant X1
XM_019898035.1	NW_017851282.1	1079.44	0.473714	0.00609822	neurofibromin%2C transcript variant X1
XM_019915210.1	NW_017852369.1	2469.44	0.473618	4.32253e-05	uncharacterized LOC109544841
XM_019907271.1	NW_017852100.1	629.924	0.473321	0.000564494	lariat debranching enzyme
XM_019910773.1	NW_017852245.1	354.567	0.473251	0.000151558	methyltransferase-like protein 22%2C transcript variant X1
XM_019914275.1	NW_017850019.1	562.851	0.473144	0.00300736	CMP-sialic acid transporter 1-like
XM_019912706.1	NW_017852312.1	1636.77	0.472731	0.000150505	ubiquitin-like protein 5
XM_019915397.1	NW_017852371.1	1594.44	0.472318	5.69858e-06	intron-binding protein aquarius%2C transcript variant X1
XM_019911961.1	NW_017852300.1	15312.1	0.471235	0.00266985	UTP--glucose-1-phosphate uridylyltransferase%2C transcript variant X1
XM_019913310.1	NW_017852336.1	417.54	0.470804	0.000105048	carnosine N-methyltransferase
XM_019913320.1	NW_017852336.1	1359.38	0.470134	0.000663803	ubiquinone biosynthesis monooxygenase COQ6%2C mitochondrial%2C transcript variant X1
XM_019911287.1	NW_017852265.1	1769.89	0.469778	0.00466625	S-adenosylmethionine mitochondrial carrier protein homolog%2C transcript variant X1
XM_019899628.1	NW_017851689.1	575.153	0.469683	6.81511e-05	uncharacterized LOC109534073
XM_019898720.1	NW_017851525.1	1274.71	0.469664	5.85848e-05	39S ribosomal protein L22%2C mitochondrial
XM_019916163.1	NW_017852381.1	247.53	0.469029	0.000935522	zinc finger protein 664-like
XM_019902546.1	NW_017852012.1	1312.87	0.468665	0.00125931	sulfide:quinone oxidoreductase%2C mitochondrial
XM_019900300.1	NW_017851749.1	2405.32	0.468498	0.000160317	eukaryotic translation initiation factor 3 subunit K-like
XM_019911546.1	NW_017852272.1	967.923	0.467377	0.000601468	PRKR-interacting protein 1 homolog
XM_019902935.1	NW_017852017.1	853.042	0.467248	5.86489e-09	cytosolic Fe-S cluster assembly factor NUBP2 homolog
XM_019902337.1	NW_017852009.1	2025.4	0.467117	0.00853154	protein ELYS
XM_019912330.1	NW_017852302.1	1829.87	0.466734	3.7584e-05	glutaredoxin-3
XM_019900922.1	NW_017851823.1	1272.84	0.46619	0.00059989	trafficking protein particle complex subunit 13
XM_019898194.1	NW_017851323.1	718.467	0.465638	0.00240507	probable DNA-directed RNA polymerases I and III subunit RPAC2
XM_019907511.1	NW_017852103.1	1090.64	0.465603	0.006721	transcription factor RFX3%2C transcript variant X1
XM_019915845.1	NW_017852380.1	1386.87	0.465194	0.00104175	bifunctional coenzyme A synthase-like
XM_019913860.1	NW_017852348.1	921.985	0.464898	0.000244758	uncharacterized LOC109543925
XM_019914985.1	NW_017852366.1	1294.89	0.464551	0.00195596	probable trans-2-enoyl-CoA reductase%2C mitochondrial
XM_019913432.1	NW_017852337.1	512.782	0.464068	0.00165183	beta-1%2C3-galactosyltransferase brn
XM_019913862.1	NW_017852348.1	1353.55	0.463847	0.000140577	protein Star%2C transcript variant X1
XM_019900059.1	NW_017851724.1	492.761	0.463061	0.00335993	uncharacterized LOC109534392
XM_019914363.1	NW_017852358.1	1213.66	0.461221	0.00352713	uncharacterized LOC109544270%2C transcript variant X1
XM_019906250.1	NW_017848797.1	1480.32	0.459525	0.00601853	39S ribosomal protein L11%2C mitochondrial-like
XM_019901171.1	NW_017851830.1	1137.3	0.459521	3.79914e-05	cleavage stimulation factor subunit 2 tau variant
NW_017851903.1_c17061-2059	NW_017851903.1	1092.06	0.459496	0.00214069	#N/A
XM_019901411.1	NW_017851883.1	697.77	0.459143	2.98209e-05	glycerol-3-phosphate phosphatase-like
XM_019914243.1	NW_017850018.1	532.126	0.459119	0.00517358	CMP-sialic acid transporter 1-like
XM_019915693.1	NW_017852377.1	1480.01	0.458853	0.00608055	39S ribosomal protein L11%2C mitochondrial-like
XM_019913757.1	NW_017852342.1	1068.38	0.45862	0.00175727	kelch-like protein 30%2C transcript variant X1
XM_019912629.1	NW_017852310.1	1874.96	0.458536	9.23871e-05	E3 ubiquitin-protein ligase TRIM33
XM_019911204.1	NW_017852263.1	916.561	0.457996	0.000519692	uncharacterized LOC109542133%2C transcript variant X1
XM_019904085.1	NW_017848199.1	697.048	0.457791	3.79914e-05	glycerol-3-phosphate phosphatase-like
XM_019918020.1	NW_017851185.1	2635.65	0.457123	1.44359e-09	proline-rich protein PRCC%2C transcript variant X1
XM_019907950.1	NW_017852107.1	1663.12	0.456444	1.02435e-06	SUMO-activating enzyme subunit 1
XM_019915712.1	NW_017852377.1	2259.99	0.455767	4.65769e-05	DDB1- and CUL4-associated factor 5%2C transcript variant X1
XM_019902322.1	NW_017852007.1	519.878	0.455403	0.00765752	meiosis-specific nuclear structural protein 1-like
XM_019908647.1	NW_017852117.1	2325.66	0.455362	1.03898e-08	BTB/POZ domain-containing protein 6-like%2C transcript variant X1
XM_019911835.1	NW_017852296.1	961.897	0.455247	0.00644188	replication factor C subunit 5
XM_019899241.1	NW_017851651.1	3107.35	0.453603	0.00169711	uroporphyrinogen decarboxylase
XM_019914505.1	NW_017852363.1	451.015	0.453512	0.00845374	ribonuclease P/MRP protein subunit POP5%2C transcript variant X1
XM_019905739.1	NW_017852071.1	1147.35	0.453475	0.00270315	tail-anchored protein insertion receptor WRB-like
XM_019911362.1	NW_017852267.1	467.379	0.453112	0.00555791	leukocyte receptor cluster member 1 homolog
XM_019905074.1	NW_017852056.1	325.053	0.452745	0.00640536	protein RRNAD1-like
XM_019903374.1	NW_017852028.1	539.582	0.451723	0.00369676	target of rapamycin complex subunit lst8%2C transcript variant X1
XM_019903320.1	NW_017852026.1	1240.39	0.451503	0.00578771	uncharacterized LOC109536876%2C transcript variant X1
XM_019914351.1	NW_017852358.1	777.014	0.451378	0.00500281	mitochondrial import inner membrane translocase subunit TIM16-like
XM_019900015.1	NW_017851724.1	562.763	0.451156	0.00118239	origin recognition complex subunit 2
XM_019917261.1	NW_017851131.1	983.604	0.451099	1.09659e-05	8-oxo-dGDP phosphatase NUDT18%2C transcript variant X1
XM_019900265.1	NW_017851737.1	1408.06	0.450932	0.00075109	immunoglobulin-binding protein 1
XM_019918175.1	NW_017851204.1	27553.5	0.450781	0.0021418	calmodulin
XM_019915408.1	NW_017852371.1	2377.88	0.45058	0.000285212	tryptophan--tRNA ligase%2C cytoplasmic
XM_019901655.1	NW_017851937.1	1256.38	0.450502	0.00174021	protein SMG8
XM_019908018.1	NW_017852108.1	1407.86	0.449704	0.00560788	U1 small nuclear ribonucleoprotein A
XM_019908911.1	NW_017852126.1	653.201	0.449695	0.0041446	kaptin-like
XM_019912910.1	NW_017852320.1	596.679	0.4495	0.00125931	mediator of RNA polymerase II transcription subunit 29
XM_019916255.1	NW_017852381.1	1000.62	0.448769	0.000904714	quinone oxidoreductase-like protein 2 homolog
XM_019902243.1	NW_017852003.1	668.909	0.448218	0.00282288	anaphase-promoting complex subunit 2
XM_019902117.1	NW_017851993.1	672.221	0.448053	0.000250613	peptidyl-prolyl cis-trans isomerase NIMA-interacting 4
XM_019905827.1	NW_017852073.1	567.848	0.447921	0.0024454	N-terminal Xaa-Pro-Lys N-methyltransferase 1
XM_019906192.1	NW_017848797.1	545.903	0.447562	0.000400546	D-beta-hydroxybutyrate dehydrogenase%2C mitochondrial-like
XM_019915685.1	NW_017852377.1	545.903	0.447562	0.000400546	D-beta-hydroxybutyrate dehydrogenase%2C mitochondrial-like
XM_019902289.1	NW_017852003.1	1163.27	0.447531	0.000192031	uncharacterized LOC109536182%2C transcript variant X1
XM_019910054.1	NW_017852173.1	606.479	0.447521	0.0002113	COMM domain-containing protein 3%2C transcript variant X1
XM_019901049.1	NW_017851824.1	1010.77	0.446786	0.000767521	E3 ubiquitin-protein ligase Hakai
XM_019914980.1	NW_017852366.1	1083.71	0.445566	0.00049006	GTPase Era%2C mitochondrial
XM_019915070.1	NW_017852369.1	10467.3	0.445507	0.000231284	clustered mitochondria protein homolog%2C transcript variant X1
XM_019905114.1	NW_017852058.1	190.482	0.445347	0.00640154	gastrula zinc finger protein XlCGF8.2DB-like
XM_019917541.1	NW_017851160.1	899.08	0.443834	0.00661467	5-methylcytosine rRNA methyltransferase NSUN4
XM_019912620.1	NW_017852309.1	1937.95	0.441696	3.79821e-05	uncharacterized LOC109543091%2C transcript variant X1
XM_019917247.1	NW_017851125.1	703.404	0.440393	0.00114959	60S ribosome subunit biogenesis protein NIP7 homolog
XM_019913663.1	NW_017852342.1	918.778	0.439984	0.00533982	uncharacterized LOC109543795%2C transcript variant X1
XM_019905744.1	NW_017852072.1	4595.43	0.439068	0.000278638	modifier of mdg4-like%2C transcript variant X1
XM_019916668.1	NW_017850500.1	3268.83	0.437785	0.000640685	eukaryotic translation initiation factor 3 subunit K-like
XM_019902676.1	NW_017852012.1	671.991	0.437591	0.00346239	vesicle transport protein USE1
XM_019900049.1	NW_017851724.1	1041.04	0.436748	3.96931e-05	retinoblastoma-binding protein 5 homolog%2C transcript variant X1
XM_019906527.1	NW_017852083.1	1266.66	0.436734	0.00087261	coiled-coil domain-containing protein 115
XM_019899542.1	NW_017851680.1	522.074	0.436492	0.00124241	tryptophan--tRNA ligase%2C mitochondrial
XM_019905525.1	NW_017852064.1	1202.01	0.436396	0.00303272	septin-2%2C transcript variant X1
XM_019913933.1	NW_017852348.1	1186.4	0.435789	0.000136851	NEDD8-activating enzyme E1 catalytic subunit
XM_019913639.1	NW_017852340.1	568.525	0.435554	0.00606252	uncharacterized LOC109543774
XM_019900869.1	NW_017851820.1	2641.77	0.435188	0.00017625	bystin
XM_019910832.1	NW_017852245.1	1057.2	0.434882	0.00139459	prostaglandin E synthase 2
XM_019901561.1	NW_017851924.1	755.795	0.434824	3.23387e-05	7-methylguanosine phosphate-specific 5'-nucleotidase%2C transcript variant X1
XM_019904068.1	NW_017852037.1	1924.8	0.433869	2.6414e-06	uncharacterized protein C18orf19 homolog A
XM_019906564.1	NW_017852085.1	1908.89	0.433518	0.00670238	platelet-activating factor acetylhydrolase IB subunit beta homolog
XM_019901420.1	NW_017851883.1	1847.69	0.432521	4.33662e-05	glycerol-3-phosphate phosphatase
XM_019906049.1	NW_017852073.1	1984.43	0.432447	6.99618e-09	COP9 signalosome complex subunit 6
XM_019902453.1	NW_017852012.1	745.664	0.432328	0.000586251	asparagine synthetase domain-containing protein CG17486
XM_019915471.1	NW_017852371.1	1485.66	0.43228	2.42856e-07	integrator complex subunit 9
XM_019899415.1	NW_017851654.1	2857.35	0.43126	0.000880502	glucosamine-6-phosphate isomerase-like
XM_019904255.1	NW_017852037.1	1477.63	0.430691	8.9972e-11	DCN1-like protein 1
XM_019903783.1	NW_017852032.1	988.662	0.429402	0.00051359	NEDD8-conjugating enzyme UBE2F-like%2C transcript variant X1
XM_019913696.1	NW_017852342.1	2745.31	0.429236	0.00214848	protein lin-52 homolog
XM_019915518.1	NW_017852372.1	2179.85	0.429227	0.000207018	histone-lysine N-methyltransferase setd3-like
XM_019905971.1	NW_017852073.1	478.332	0.429152	0.00615923	WD repeat domain-containing protein 83
XM_019908017.1	NW_017852108.1	743.688	0.429119	0.00800349	forkhead box protein F2-like
XM_019917321.1	NW_017851136.1	1370.21	0.428449	0.00209022	OCIA domain-containing protein 1
XM_019907049.1	NW_017852096.1	500.755	0.428398	0.00868276	TFIIH basal transcription factor complex helicase XPD subunit
XM_019910626.1	NW_017849390.1	1255.97	0.428235	0.000124431	39S ribosomal protein L21%2C mitochondrial%2C transcript variant X1
XM_019910817.1	NW_017852245.1	1716.85	0.427442	0.000118159	ran GTPase-activating protein 1
XM_019910667.1	NW_017852245.1	1560.3	0.427008	0.00118297	PQ-loop repeat-containing protein 3
XM_019908636.1	NW_017852117.1	3634.13	0.426283	0.00182248	chromobox protein homolog 3-like
XM_019912417.1	NW_017852305.1	2640.87	0.425336	0.00568953	histone acetyltransferase type B catalytic subunit
XM_019914315.1	NW_017852358.1	1746.93	0.424701	0.000564113	serine/threonine-protein phosphatase Pgam5%2C mitochondrial-like%2C transcript variant X1
XM_019915604.1	NW_017850268.1	1797.23	0.424499	1.08515e-05	centromere/kinetochore protein zw10 homolog
XM_019906277.1	NW_017852082.1	3304.34	0.424175	0.000326209	uncharacterized LOC109538862%2C transcript variant X1
XM_019900263.1	NW_017851737.1	486.02	0.424099	0.00311584	probable ATP-dependent RNA helicase DDX20
XM_019913139.1	NW_017852328.1	640.765	0.423996	0.00214061	metaxin-1
XM_019904372.1	NW_017852038.1	2151.47	0.423933	0.00598508	ubiquitin-conjugating enzyme E2 N-like
XM_019915495.1	NW_017852371.1	1082.1	0.423435	0.000197595	ADP-ribosylation factor-like protein 2
XM_019917577.1	NW_017851165.1	1501.27	0.423288	0.000104062	peptidyl-prolyl cis-trans isomerase-like 2
XM_019915326.1	NW_017845823.1	859.879	0.423276	2.52929e-05	cleavage stimulation factor subunit 2-like
XM_019901340.1	NW_017851860.1	1464.58	0.422874	0.000260766	putative RNA exonuclease NEF-sp
XM_019916770.1	NW_017850687.1	861.372	0.422586	2.77935e-05	cleavage stimulation factor subunit 2-like
XM_019915711.1	NW_017852377.1	1957.21	0.4219	0.00167437	WD repeat-containing protein 74
XM_019917424.1	NW_017851153.1	738.154	0.420784	0.000496438	cyclin-dependent kinase 7
XM_019899535.1	NW_017851680.1	964.921	0.419992	1.04173e-05	partner of xrn-2 protein 1-like
XM_019915900.1	NW_017852380.1	1491.23	0.419641	0.00218553	cAMP-regulated phosphoprotein 19
XM_019912622.1	NW_017849664.1	419.103	0.419475	0.00141744	protein arginine N-methyltransferase 3-like
XM_019912874.1	NW_017852315.1	1831.27	0.41934	0.000343735	alpha- and gamma-adaptin-binding protein p34-like
XM_019903229.1	NW_017852021.1	379.305	0.418995	0.00343079	rRNA methyltransferase 2%2C mitochondrial
XM_019900503.1	NW_017851775.1	966.622	0.418953	0.0003382	probable dimethyladenosine transferase
XM_019913524.1	NW_017852339.1	3263.22	0.418908	0.00629994	proteasome inhibitor PI31 subunit-like%2C transcript variant X1
XM_019905085.1	NW_017852058.1	115.316	0.418889	0.00791937	zinc finger protein 268-like
XM_019900952.1	NW_017851824.1	774.772	0.418723	0.000412876	WD repeat-containing protein 24
XR_002172610.1	NW_017845819.1	674.192	0.4182	0.00187643	THAP domain-containing protein 4-like%2C transcript variant X1
XM_019912473.1	NW_017852305.1	4573.81	0.416786	0.00938252	NADH dehydrogenase [ubiquinone] iron-sulfur protein 8%2C mitochondrial
XM_019906875.1	NW_017848910.1	418.507	0.416062	0.00164939	protein arginine N-methyltransferase 3-like
XM_019902981.1	NW_017852017.1	618.745	0.415721	0.00951765	uncharacterized LOC109536667
XM_019900149.1	NW_017851737.1	1613.71	0.415505	0.00349886	uridine diphosphate glucose pyrophosphatase-like
XM_019914688.1	NW_017852366.1	4572.85	0.415027	0.00917018	WD repeat domain phosphoinositide-interacting protein 2-like%2C transcript variant X1
XM_019907486.1	NW_017852103.1	5606.98	0.414389	0.000212343	elongation factor Tu-like
XM_019904030.1	NW_017852037.1	450.054	0.413905	0.000852663	phosphatidate cytidylyltransferase%2C mitochondrial
XM_019904781.1	NW_017852055.1	1324.6	0.41328	0.00129564	cyclin-dependent kinase 2-associated protein 1-like%2C transcript variant X1
XM_019900918.1	NW_017851823.1	487.842	0.413263	0.00163434	putative transferase CAF17 homolog%2C mitochondrial
XM_019903332.1	NW_017852026.1	383.151	0.412432	0.00749157	D-beta-hydroxybutyrate dehydrogenase%2C mitochondrial-like
XM_019904015.1	NW_017852037.1	2825.9	0.412336	0.000983393	ubiquitin-like-conjugating enzyme ATG3
XM_019904553.1	NW_017852043.1	550.77	0.411771	0.000671622	U6 snRNA-associated Sm-like protein LSm5%2C transcript variant X1
XM_019914337.1	NW_017852358.1	727.401	0.411295	0.00601639	mediator of RNA polymerase II transcription subunit 30
XM_019917351.1	NW_017851139.1	1004.72	0.411246	0.00429453	1%2C2-dihydroxy-3-keto-5-methylthiopentene dioxygenase-like
XM_019902669.1	NW_017852012.1	1110.86	0.411103	0.00459765	28S ribosomal protein S17%2C mitochondrial
XM_019918150.1	NW_017851201.1	682.788	0.411059	0.000622698	ubiquitin carboxyl-terminal hydrolase calypso%2C transcript variant X1
XM_019898613.1	NW_017851488.1	556.96	0.410516	0.00834936	transforming growth factor beta regulator 1-like
XM_019908857.1	NW_017852126.1	694.235	0.40949	0.00299444	polyribonucleotide nucleotidyltransferase 1%2C mitochondrial
XM_019898936.1	NW_017851601.1	1262.88	0.409221	0.00591038	mitochondrial import inner membrane translocase subunit TIM44
XM_019897779.1	NW_017851239.1	4859.16	0.409193	0.00526014	thioredoxin-like protein 1
XM_019911033.1	NW_017852256.1	1597.49	0.408421	3.79421e-05	ubiquitin-conjugating enzyme E2 S
XM_019898509.1	NW_017851452.1	376.627	0.407816	0.000349708	protein UXT homolog%2C transcript variant X1
XM_019903785.1	NW_017852032.1	2063.61	0.406981	5.54529e-05	protein phosphatase methylesterase 1%2C transcript variant X1
XM_019906962.1	NW_017852092.1	272.37	0.40688	0.000243565	transducin-like enhancer protein 4
XM_019914463.1	NW_017850048.1	1960.08	0.40674	0.0027475	glucosamine-6-phosphate isomerase-like%2C transcript variant X1
XM_019914004.1	NW_017852350.1	413.349	0.406271	0.00562408	zinc finger protein OZF-like
XM_019902974.1	NW_017852017.1	799.688	0.405802	0.00218252	anaphase-promoting complex subunit 15-like%2C transcript variant X1
XM_019909259.1	NW_017852156.1	1001.78	0.405801	0.00666714	COP9 signalosome complex subunit 8
XM_019902550.1	NW_017852012.1	681.894	0.405683	4.95177e-07	neuralized-like protein 2
XM_019910029.1	NW_017852168.1	2854.99	0.404778	1.11204e-07	RISC-loading complex subunit tarbp2-like
XM_019905191.1	NW_017852058.1	2469.03	0.404489	0.000765992	DNA topoisomerase 2
XM_019909243.1	NW_017852156.1	1579.87	0.404132	0.000697511	ribosome biogenesis protein WDR12 homolog
XM_019917490.1	NW_017851159.1	585.307	0.403595	0.00406344	rhomboid-related protein 2
XM_019912033.1	NW_017852300.1	8850.61	0.403544	0.00721624	uncharacterized LOC109542699
XM_019911814.1	NW_017852296.1	2039.83	0.403527	0.0095138	protein FAM122A-like%2C transcript variant X1
XM_019915405.1	NW_017852371.1	1329.42	0.403458	0.000101673	protein SDE2 homolog
XM_019898377.1	NW_017851403.1	1455.74	0.403053	0.000131886	RNA-binding protein 45
XM_019912014.1	NW_017852300.1	2726.73	0.402962	0.00647254	probable pterin-4-alpha-carbinolamine dehydratase
XM_019908780.1	NW_017852123.1	923.593	0.402796	8.51327e-06	poly(ADP-ribose) glycohydrolase
XM_019908500.1	NW_017852115.1	1485.98	0.401505	9.26991e-09	myotubularin-related protein 10-A
XM_019905111.1	NW_017852058.1	274.684	0.401121	0.000701967	zinc finger protein OZF-like
XM_019910863.1	NW_017852247.1	999.816	0.400867	0.00227107	ribonucleases P/MRP protein subunit POP1
XM_019899677.1	NW_017851694.1	4904.21	0.399801	0.00025199	transient receptor potential cation channel trpm%2C transcript variant X1
XM_019905808.1	NW_017852073.1	2884.87	0.399764	0.00813346	probable histone-lysine N-methyltransferase CG1716
XM_019901419.1	NW_017851883.1	650.971	0.399569	0.00116488	probable asparagine--tRNA ligase%2C mitochondrial
XM_019907777.1	NW_017852106.1	1509.81	0.399265	9.82352e-05	39S ribosomal protein L30%2C mitochondrial
XM_019912864.1	NW_017852313.1	8200.49	0.398879	0.00262955	NADH dehydrogenase [ubiquinone] flavoprotein 1%2C mitochondrial
XM_019914649.1	NW_017850082.1	1597.14	0.398591	0.000103458	prefoldin subunit 3-like
XM_019904683.1	NW_017852052.1	9450.57	0.398443	0.00421623	46 kDa FK506-binding nuclear protein
XM_019908948.1	NW_017852126.1	1064.94	0.397608	7.56313e-05	nuclear pore membrane glycoprotein 210
XM_019907782.1	NW_017852106.1	1203.35	0.397473	0.000762176	nuclear pore complex protein Nup107%2C transcript variant X1
XM_019898056.1	NW_017851282.1	1152.6	0.397189	0.000128818	DNA repair protein complementing XP-A cells homolog
XM_019915626.1	NW_017852377.1	1247.44	0.397092	3.5407e-05	probable phenylalanine--tRNA ligase%2C mitochondrial
XM_019910464.1	NW_017852228.1	1597.13	0.396759	0.00010294	prefoldin subunit 3-like
XM_019909811.1	NW_017852166.1	981.526	0.396747	0.00198777	facilitated trehalose transporter Tret1-like
XM_019905621.1	NW_017852067.1	541.174	0.395617	0.0024688	translation initiation factor IF-3%2C mitochondrial
XM_019905038.1	NW_017852056.1	2588.09	0.3955	0.00034865	UDP-xylose and UDP-N-acetylglucosamine transporter-like%2C transcript variant X1
XM_019898353.1	NW_017851403.1	640.785	0.395379	0.000120074	cell division cycle protein 23 homolog
XM_019904146.1	NW_017852037.1	1663.18	0.395351	0.000756381	39S ribosomal protein L47%2C mitochondrial
XM_019911269.1	NW_017852263.1	366.143	0.395322	0.00989609	DNA repair and recombination protein RAD54-like
XM_019899706.1	NW_017851694.1	1083.41	0.393344	0.000845704	39S ribosomal protein L39%2C mitochondrial
XM_019912339.1	NW_017852302.1	617.356	0.393238	0.00868276	integrator complex subunit 10
XM_019914124.1	NW_017852350.1	1861.89	0.391957	0.00073652	probable prefoldin subunit 4
XM_019899921.1	NW_017851724.1	2620.42	0.39171	0.00024405	AFG3-like protein 2
XM_019918258.1	NW_017851223.1	547.309	0.391206	5.32689e-08	non-structural maintenance of chromosomes element 1 homolog
XM_019913153.1	NW_017852328.1	547.343	0.391205	5.32689e-08	non-structural maintenance of chromosomes element 1 homolog
XM_019910121.1	NW_017849321.1	1137.06	0.390792	0.00409691	prefoldin subunit 3-like
XM_019899698.1	NW_017851694.1	1366.51	0.390523	0.00787801	retinol dehydrogenase 12-like%2C transcript variant X1
XM_019914879.1	NW_017852366.1	2173.41	0.390498	0.00717066	zinc finger HIT domain-containing protein 3%2C transcript variant X1
XM_019905416.1	NW_017852064.1	480.785	0.389146	0.00820072	centrosomal protein of 162 kDa%2C transcript variant X1
XM_019903155.1	NW_017852021.1	872.089	0.388136	0.00577754	COX assembly mitochondrial protein homolog
XM_019906711.1	NW_017852086.1	2909.66	0.387604	0.00087261	histone H2A deubiquitinase MYSM1-like%2C transcript variant X1
XM_019902101.1	NW_017851993.1	2515.32	0.386772	0.00198689	28S ribosomal protein S22%2C mitochondrial
XM_019914856.1	NW_017852366.1	959.379	0.386551	0.000240449	U3 small nucleolar RNA-associated protein 15 homolog
XM_019905483.1	NW_017848653.1	930.972	0.38632	0.000183272	N-alpha-acetyltransferase 15%2C NatA auxiliary subunit-like
XR_002172207.1	NW_017852126.1	307.092	0.386167	0.000830458	uncharacterized LOC109540534%2C transcript variant X1
XM_019911787.1	NW_017852296.1	967.533	0.385029	0.000717498	serine/threonine-protein phosphatase 2A activator-like
XM_019898073.1	NW_017846446.1	1331.7	0.384964	0.000101673	uncharacterized LOC109532926
XM_019899497.1	NW_017851666.1	1331.7	0.384964	0.000101673	uncharacterized LOC109533968
XM_019906210.1	NW_017852081.1	1191.86	0.384812	0.000600543	N-alpha-acetyltransferase 15%2C NatA auxiliary subunit-like
XM_019911704.1	NW_017852288.1	720.708	0.384543	0.00126777	tudor domain-containing protein 3-like
XM_019904512.1	NW_017852043.1	994.628	0.384209	0.00199917	zinc finger and SCAN domain-containing protein 12-like
XM_019911441.1	NW_017852269.1	1698.08	0.383958	0.000901099	28S ribosomal protein S35%2C mitochondrial
XM_019906018.1	NW_017852073.1	2776.9	0.382737	7.33603e-05	calcium uptake protein 1 homolog%2C mitochondrial-like%2C transcript variant X1
XM_019900899.1	NW_017851823.1	1292.55	0.381939	0.00102617	protein AATF
XM_019915409.1	NW_017852371.1	1098.3	0.38176	0.00246241	m7GpppN-mRNA hydrolase
XM_019915035.1	NW_017852368.1	779.774	0.380706	0.000490809	coiled-coil domain-containing protein 134-like
XM_019913768.1	NW_017852342.1	599.862	0.380613	0.00178838	uncharacterized LOC109543853%2C transcript variant X1
XM_019908482.1	NW_017852115.1	1006.85	0.380118	0.00420707	U1 small nuclear ribonucleoprotein C
XM_019908726.1	NW_017852118.1	1759.59	0.379934	0.0026769	WD and tetratricopeptide repeats protein 1-like
XM_019916936.1	NW_017851008.1	456.029	0.379642	0.00102617	oligoribonuclease%2C mitochondrial-like
XM_019912052.1	NW_017849592.1	279.78	0.378533	0.00685511	uncharacterized LOC109542713
XM_019901503.1	NW_017851913.1	774.084	0.377722	0.00268625	UPF0415 protein C7orf25 homolog
XM_019911556.1	NW_017852278.1	2006.57	0.377339	0.00240379	protein mini spindles
XM_019910493.1	NW_017852233.1	379.429	0.376651	0.00871769	post-GPI attachment to proteins factor 2-like
XM_019902797.1	NW_017847848.1	903.792	0.376311	0.000878154	mitotic checkpoint protein BUB3-like
XM_019906367.1	NW_017848819.1	379.469	0.376215	0.00883447	post-GPI attachment to proteins factor 2-like
XM_019910470.1	NW_017852228.1	1932.63	0.376203	0.000301802	prefoldin subunit 3-like
XM_019913826.1	NW_017852346.1	524.308	0.376198	0.00624448	pre-mRNA-splicing factor 18-like
XM_019907898.1	NW_017852107.1	547.473	0.375968	0.000600198	probable RNA methyltransferase CG11342
XM_019910492.1	NW_017852233.1	379.314	0.375743	0.00885942	post-GPI attachment to proteins factor 2-like
XM_019913404.1	NW_017849817.1	816.032	0.375699	0.00214061	UPF0415 protein C7orf25 homolog
XM_019906689.1	NW_017852086.1	9065.42	0.374866	0.00674851	nucleoplasmin-like protein%2C transcript variant X1
XM_019905653.1	NW_017852068.1	5320.26	0.374448	0.000886611	T-complex protein 1 subunit beta
XM_019906871.1	NW_017852091.1	577.816	0.37421	0.00419613	DNA replication complex GINS protein PSF1-like
XM_019911119.1	NW_017852258.1	1306.32	0.373084	0.00280693	treacle protein-like%2C transcript variant X1
XM_019910851.1	NW_017852245.1	1284.31	0.371939	0.00451553	probable small nuclear ribonucleoprotein Sm D1
XM_019905900.1	NW_017852073.1	1451.43	0.371665	4.26523e-05	pre-mRNA 3' end processing protein WDR33
XM_019918060.1	NW_017851187.1	1900.07	0.371297	0.000105825	neutral and basic amino acid transport protein rBAT%2C transcript variant X1
XM_019911987.1	NW_017852300.1	345.82	0.370723	0.00610199	uncharacterized protein C1orf43 homolog%2C transcript variant X1
XM_019900201.1	NW_017851737.1	799.04	0.37072	0.000687329	nuclear nucleic acid-binding protein C1D-like
XM_019906826.1	NW_017852091.1	829.94	0.369709	0.00235895	nuclear pore complex protein Nup160 homolog
XM_019918260.1	NW_017851223.1	2482.5	0.369412	0.00213508	mitochondrial pyruvate carrier 2-like
XM_019907086.1	NW_017852096.1	25348.4	0.369244	0.0071563	protein disulfide-isomerase
XM_019903417.1	NW_017852028.1	500.225	0.369133	0.00189795	deoxyhypusine hydroxylase
XM_019914919.1	NW_017852366.1	1598.92	0.368617	0.00281232	evolutionarily conserved signaling intermediate in Toll pathway%2C mitochondrial-like
XM_019905398.1	NW_017852064.1	1622.4	0.368342	0.005831	dynein assembly factor 5%2C axonemal%2C transcript variant X1
XM_019900663.1	NW_017851783.1	864.673	0.368291	0.0088149	ATP-dependent RNA helicase Ddx1
XM_019913170.1	NW_017852328.1	2482.89	0.367733	0.00226016	mitochondrial pyruvate carrier 2-like
XM_019916230.1	NW_017852381.1	1645.59	0.36755	0.00555971	TBC1 domain family member 7
XM_019916256.1	NW_017852381.1	591.381	0.366415	0.0076931	THO complex subunit 6 homolog
XM_019911277.1	NW_017852265.1	1602.66	0.366303	0.00295693	evolutionarily conserved signaling intermediate in Toll pathway%2C mitochondrial-like
XM_019901506.1	NW_017844745.1	535.069	0.366163	0.00671509	melanization protease 1-like
XM_019898252.1	NW_017851379.1	829.774	0.366039	7.86595e-07	TATA-box-binding protein
XM_019903078.1	NW_017852017.1	2010.52	0.365745	0.0007783	28S ribosomal protein S33%2C mitochondrial
XM_019913251.1	NW_017852336.1	1556.71	0.365359	0.00551676	cytochrome P450 6B1-like
XM_019901525.1	NW_017851920.1	929.005	0.365312	0.000671622	uncharacterized LOC109535608
XM_019916107.1	NW_017852381.1	1743.36	0.36519	0.00109637	B-cell CLL/lymphoma 7 protein family member A
XM_019902119.1	NW_017851993.1	8020.63	0.365086	0.000672285	extracellular sulfatase SULF-1 homolog
XM_019904937.1	NW_017848485.1	774.972	0.363772	0.00218863	N-alpha-acetyltransferase 15%2C NatA auxiliary subunit-like
XM_019903931.1	NW_017852037.1	1351.22	0.363598	8.57997e-07	cleavage stimulation factor subunit 1
XM_019905948.1	NW_017852073.1	368.936	0.363482	0.000381801	uncharacterized LOC109538628
XM_019909170.1	NW_017852139.1	734.012	0.363011	0.00639433	uncharacterized LOC109540715
XM_019903460.1	NW_017852029.1	1967.81	0.363001	0.00185867	H/ACA ribonucleoprotein complex subunit 3
XM_019917764.1	NW_017846193.1	965.549	0.362577	0.00130375	N-alpha-acetyltransferase 15%2C NatA auxiliary subunit-like
XM_019912170.1	NW_017849621.1	909.503	0.362438	0.0059438	putative E3 ubiquitin-protein ligase UBR7
XM_019913157.1	NW_017852328.1	682.134	0.362285	0.000112429	trafficking protein particle complex subunit 5
XM_019911837.1	NW_017852296.1	490.077	0.362075	0.00751793	uncharacterized LOC109542565
XM_019904178.1	NW_017852037.1	3068.96	0.362071	0.000463952	kelch-like protein diablo
XM_019903925.1	NW_017852037.1	2259.68	0.361876	0.000238126	39S ribosomal protein L15%2C mitochondrial
XM_019904608.1	NW_017852049.1	4502.34	0.361228	0.00615039	protein l(2)37Cc
XM_019905682.1	NW_017852068.1	951.099	0.359349	0.000813056	mitotic checkpoint protein BUB3-like
XM_019900921.1	NW_017851823.1	1128.77	0.359349	0.00197956	tubulin--tyrosine ligase-like protein 12
XM_019917088.1	NW_017851087.1	1315.09	0.359342	0.00334768	splicing factor 3A subunit 3
XM_019915078.1	NW_017852369.1	1383.71	0.359291	2.49198e-05	tRNA dimethylallyltransferase%2C mitochondrial
XM_019902551.1	NW_017852012.1	13875.3	0.358787	0.000178903	nascent polypeptide-associated complex subunit alpha
XM_019917145.1	NW_017851087.1	610.454	0.358086	0.00116488	uncharacterized LOC109546250
XM_019907456.1	NW_017852103.1	538.521	0.356528	0.00368228	DNA polymerase epsilon subunit 4
XM_019903769.1	NW_017852032.1	1948.73	0.356102	0.00152336	coiled-coil domain-containing protein R3HCC1L-like%2C transcript variant X1
XM_019906236.1	NW_017852082.1	1702.89	0.354392	0.00249022	DNA-directed RNA polymerase III subunit RPC5
XM_019908438.1	NW_017852115.1	959.779	0.354384	0.00277516	transcription initiation factor TFIID subunit 13
XM_019911417.1	NW_017852269.1	1830.88	0.353275	0.00377301	mediator of RNA polymerase II transcription subunit 23
XM_019903313.1	NW_017852026.1	2773.88	0.351927	0.00920229	tudor domain-containing protein 1-like%2C transcript variant X1
XM_019908768.1	NW_017852122.1	2264.05	0.351816	0.000362351	basic salivary proline-rich protein 1-like
XM_019898861.1	NW_017851577.1	3018.19	0.351426	0.00521278	caprin homolog%2C transcript variant X1
XM_019909368.1	NW_017852166.1	4771.99	0.351393	0.00876054	uncharacterized LOC109540869
XM_019900435.1	NW_017851773.1	1324.26	0.351173	0.00748156	nucleoporin Nup37
XM_019916816.1	NW_017850775.1	3018.22	0.351171	0.00526208	caprin homolog%2C transcript variant X1
XM_019898493.1	NW_017851445.1	777.899	0.350861	0.00864434	translation initiation factor eIF-2B subunit epsilon%2C transcript variant X1
XM_019911686.1	NW_017852287.1	1708.91	0.350787	0.00267547	serine/threonine-protein kinase D1%2C transcript variant X1
NW_017848745.1_5706-7006	NW_017848745.1	457.415	0.350679	0.00766115	#N/A
XM_019903259.1	NW_017852026.1	450.46	0.350203	0.00749743	uncharacterized LOC109536846
XM_019902081.1	NW_017851988.1	1589.96	0.350139	0.000170302	centromere/kinetochore protein zw10 homolog
XM_019912062.1	NW_017849592.1	2024.42	0.349285	0.000231284	periodic tryptophan protein 1 homolog
XM_019915442.1	NW_017852371.1	2078.02	0.349197	0.00617673	uncharacterized LOC109544988%2C transcript variant X1
XM_019910125.1	NW_017852175.1	898.009	0.349045	0.00200291	probable asparagine--tRNA ligase%2C mitochondrial
XM_019908142.1	NW_017849021.1	506.354	0.348927	0.00104919	N-alpha-acetyltransferase 15%2C NatA auxiliary subunit-like
XM_019910787.1	NW_017852245.1	794.773	0.34887	0.000926515	probable malonyl-CoA-acyl carrier protein transacylase%2C mitochondrial
XM_019912873.1	NW_017852315.1	1763.61	0.348173	0.00206958	periodic tryptophan protein 1 homolog
XM_019905758.1	NW_017848723.1	695.352	0.347839	0.000243565	death-associated inhibitor of apoptosis 2-like
XM_019917921.1	NW_017851181.1	2668.11	0.34772	0.00575604	histone chaperone asf1
XM_019913266.1	NW_017852336.1	582.323	0.34767	0.00221479	sister chromatid cohesion protein DCC1
XM_019906918.1	NW_017852091.1	2361.65	0.347532	0.000490809	39S ribosomal protein L9%2C mitochondrial
XM_019907193.1	NW_017852100.1	1072.8	0.347468	3.5054e-05	adenylate kinase isoenzyme 6
XM_019899859.1	NW_017851716.1	718.672	0.347422	0.0029884	ubiquinol-cytochrome-c reductase complex assembly factor 1-like
XM_019899835.1	NW_017851713.1	771.678	0.346599	0.00706062	pyridoxal phosphate phosphatase PHOSPHO2-like
XM_019917246.1	NW_017851125.1	578.578	0.345881	0.000792275	crossover junction endonuclease MUS81
XR_002172719.1	NW_017850780.1	302.826	0.34566	0.00967242	uncharacterized LOC109545979
XM_019904292.1	NW_017852037.1	2210.83	0.345389	0.00266283	uncharacterized LOC109537517%2C transcript variant X1
XM_019916927.1	NW_017850986.1	2045.39	0.345119	0.00621238	ribosome production factor 2 homolog
XM_019906803.1	NW_017852091.1	977.083	0.344872	0.0086127	polycomb protein EED
XM_019909877.1	NW_017852166.1	2500.57	0.344606	0.000879749	sodium/hydrogen exchanger 7%2C transcript variant X1
XM_019901281.1	NW_017851856.1	878.642	0.344419	0.000756892	centromere/kinetochore protein zw10 homolog
XM_019904822.1	NW_017848453.1	348.499	0.343978	0.00920229	WD and tetratricopeptide repeats protein 1-like
XM_019917777.1	NW_017846193.1	929.758	0.343386	0.00220312	DNA-directed RNA polymerase III subunit RPC3-like
XR_002172720.1	NW_017850781.1	303.428	0.342798	0.009765	uncharacterized LOC109545983
XM_019906211.1	NW_017852081.1	928.867	0.342789	0.00216817	DNA-directed RNA polymerase III subunit RPC3-like
XM_019914356.1	NW_017852358.1	2415.01	0.342612	0.000284361	regulation of nuclear pre-mRNA domain-containing protein 1B
XM_019907603.1	NW_017852104.1	1108.91	0.342303	0.00315221	ribosomal RNA small subunit methyltransferase NEP1
XM_019910581.1	NW_017852241.1	2600.26	0.341982	0.00402544	apoptosis-inducing factor 1%2C mitochondrial%2C transcript variant X1
XM_019905586.1	NW_017852064.1	1435.37	0.341685	0.00634558	GTP-binding protein 128up
XM_019915610.1	NW_017852377.1	932.795	0.341667	0.00664446	uncharacterized LOC109545114
XM_019915956.1	NW_017850342.1	601.573	0.341649	0.00103774	uncharacterized LOC109545327
XM_019903132.1	NW_017852021.1	2165.97	0.341305	0.000176103	uncharacterized LOC109536774
XM_019914295.1	NW_017852358.1	997.927	0.340749	0.00542633	uncharacterized LOC109544226
XM_019908480.1	NW_017852115.1	1685.74	0.339288	0.000717446	vesicle transport protein SEC20
XM_019903951.1	NW_017852037.1	2933.11	0.339213	0.00551013	28S ribosomal protein S15%2C mitochondrial
XM_019906737.1	NW_017852087.1	1692.23	0.339053	0.00554179	DNA-directed RNA polymerase I subunit RPA43
XM_019904538.1	NW_017852043.1	602.11	0.338622	0.000541472	THUMP domain-containing protein 1 homolog
XM_019905108.1	NW_017852058.1	279.078	0.338477	0.00542034	zinc finger protein 182-like
XM_019903865.1	NW_017852034.1	1007.35	0.338006	0.00344334	conserved oligomeric Golgi complex subunit 1%2C transcript variant X1
XM_019899814.1	NW_017851713.1	1524.29	0.337791	0.001761	probable small nuclear ribonucleoprotein Sm D2
XM_019904951.1	NW_017848485.1	591.808	0.337132	0.0014437	DNA-directed RNA polymerase III subunit RPC3-like
XM_019901913.1	NW_017851949.1	1921.1	0.335367	0.0002498	28S ribosomal protein S2%2C mitochondrial
XM_019901700.1	NW_017851937.1	2318.89	0.335168	0.00568953	39S ribosomal protein L10%2C mitochondrial
XM_019917106.1	NW_017851087.1	1634.55	0.334734	0.0034551	nitric oxide-associated protein 1
XM_019902406.1	NW_017852012.1	1014.62	0.334713	0.00226063	protoheme IX farnesyltransferase%2C mitochondrial%2C transcript variant X1
XM_019905688.1	NW_017852068.1	1447.17	0.334689	0.00312787	probable ATP-dependent RNA helicase YTHDC2%2C transcript variant X1
XM_019915387.1	NW_017852371.1	1048.4	0.333334	0.00119373	transcription initiation factor TFIID subunit 8-like
XM_019907802.1	NW_017852106.1	1354.57	0.333267	0.000353551	RING finger protein 37
XM_019911975.1	NW_017852300.1	1263.02	0.33296	0.00651914	DNA-directed RNA polymerases I and III subunit RPAC1
XM_019904515.1	NW_017852043.1	2438.3	0.332309	0.00399921	chromobox protein homolog 5
XM_019907191.1	NW_017852100.1	2303.59	0.332176	0.000550614	DNA/RNA-binding protein KIN17
XM_019907088.1	NW_017852096.1	922.906	0.331781	0.00863783	epimerase family protein SDR39U1%2C transcript variant X1
XM_019903982.1	NW_017852037.1	5759.26	0.33113	0.00526924	eukaryotic translation initiation factor 4E-1A-like
XM_019914774.1	NW_017852366.1	2687.3	0.331107	0.0021286	thioredoxin domain-containing protein 9
XM_019917251.1	NW_017851125.1	2045.03	0.330445	0.000962048	formin-binding protein 4-like
XM_019915709.1	NW_017852377.1	395.895	0.328969	0.00249022	actin-related protein 8-like
XM_019909860.1	NW_017852166.1	3227.3	0.328417	0.00381488	mitochondrial import inner membrane translocase subunit TIM50-C-like
XM_019902566.1	NW_017852012.1	898.097	0.326066	0.00336992	uncharacterized LOC109536378%2C transcript variant X1
XM_019905177.1	NW_017852058.1	1047.83	0.325955	0.00268396	serine/threonine-protein phosphatase 4 regulatory subunit 4-like%2C transcript variant X1
XM_019913330.1	NW_017852336.1	1783.34	0.324758	0.000367101	cob(I)yrinic acid a%2Cc-diamide adenosyltransferase%2C mitochondrial-like
XM_019898547.1	NW_017851453.1	939.883	0.323578	0.00159678	uncharacterized LOC109533264
XM_019910751.1	NW_017852245.1	1930.44	0.322906	0.00915305	beta-parvin
XM_019904883.1	NW_017852056.1	1174.54	0.322648	0.00183757	leishmanolysin-like peptidase
XM_019903556.1	NW_017852030.1	579.609	0.322261	0.00764432	protein arginine methyltransferase NDUFAF7 homolog%2C mitochondrial
XM_019913348.1	NW_017852336.1	5035.51	0.320919	0.00249766	protein LTV1 homolog
XM_019916714.1	NW_017845862.1	3550.59	0.320265	0.00103656	T-complex protein 1 subunit eta-like
XM_019917861.1	NW_017846219.1	3712.43	0.318917	0.00293491	T-complex protein 1 subunit eta-like
XM_019899528.1	NW_017851680.1	1468.91	0.318818	0.000899125	coiled-coil domain-containing protein 28A%2C transcript variant X1
XM_019908756.1	NW_017852121.1	623.3	0.317492	0.00130855	39S ribosomal protein L48%2C mitochondrial
XM_019906903.1	NW_017852091.1	1218.01	0.316683	0.0015868	nuclear envelope integral membrane protein 1
XM_019902258.1	NW_017852003.1	933.992	0.316653	0.00637637	dr1-associated corepressor
XM_019901218.1	NW_017851842.1	931.053	0.316169	0.00162356	histone deacetylase complex subunit SAP30 homolog
XM_019899639.1	NW_017851690.1	1696.36	0.313956	0.00702628	RNA cytidine acetyltransferase%2C transcript variant X1
XM_019908838.1	NW_017852126.1	3011.13	0.313781	0.00389631	polyadenylate-binding protein 2%2C transcript variant X1
XM_019900327.1	NW_017851754.1	2715.67	0.312348	0.000134756	baculoviral IAP repeat-containing protein 7-B-like%2C transcript variant X1
XM_019902483.1	NW_017852012.1	1483.47	0.312222	8.22309e-05	HD domain-containing protein 2
XM_019908107.1	NW_017852110.1	339.076	0.311717	0.000214851	uncharacterized LOC109539997
XM_019902400.1	NW_017847751.1	2280.36	0.311468	0.000765992	gametocyte-specific factor 1 homolog
XM_019903153.1	NW_017847924.1	2280.31	0.311261	0.000773453	gametocyte-specific factor 1 homolog
XM_019909162.1	NW_017852139.1	1671.67	0.309797	0.00119548	translation initiation factor eIF-2B subunit beta
XM_019901633.1	NW_017851931.1	973.108	0.3085	0.0018189	general transcription factor IIH subunit 1
XM_019914654.1	NW_017852366.1	1595.52	0.306773	0.00521278	protein-associating with the carboxyl-terminal domain of ezrin
XM_019904601.1	NW_017852049.1	2531.51	0.305451	0.00317098	leucine-rich repeat-containing protein 40-like%2C transcript variant X1
XM_019916083.1	NW_017852381.1	1288.67	0.304545	0.00615039	calcium homeostasis endoplasmic reticulum protein%2C transcript variant X1
XR_002172448.1	NW_017849571.1	4311.24	0.304272	0.00749157	T-complex protein 1 subunit eta pseudogene
XM_019911783.1	NW_017852296.1	2958.89	0.303897	0.00387136	uncharacterized LOC109542528
XM_019904932.1	NW_017852056.1	1146.8	0.303733	0.0086221	protein SHQ1 homolog
XM_019903416.1	NW_017852028.1	1090.67	0.30212	0.000465941	nuclear pore complex protein Nup85
XM_019913651.1	NW_017849902.1	24989.2	0.300157	0.00675277	60S ribosomal protein L5-like
XM_019903476.1	NW_017852029.1	1550.43	0.299852	0.00143325	complex I intermediate-associated protein 30%2C mitochondrial
XM_019901314.1	NW_017851859.1	1272.41	0.299801	0.00220001	histone acetyltransferase KAT8
XM_019916334.1	NW_017852381.1	1091.76	0.299217	0.00887834	TGF-beta-activated kinase 1 and MAP3K7-binding protein 1-like
XM_019916805.1	NW_017850746.1	1140	0.297616	0.00698827	RNA polymerase II-associated factor 1 homolog
XM_019901075.1	NW_017851824.1	1172.34	0.297492	0.00112371	protein MTO1 homolog%2C mitochondrial%2C transcript variant X1
XM_019913260.1	NW_017852336.1	1973.01	0.295981	0.00215866	epidermal growth factor receptor substrate 15-like 1%2C transcript variant X1
XM_019902338.1	NW_017852009.1	1349.89	0.295322	0.0022492	DNA-directed RNA polymerase III subunit RPC2
XM_019897932.1	NW_017851282.1	5615.36	0.294475	0.00383427	small glutamine-rich tetratricopeptide repeat-containing protein beta-like%2C transcript variant X1
XM_019903247.1	NW_017852026.1	4726.71	0.292941	0.00573912	serine/threonine-protein phosphatase 2A 56 kDa regulatory subunit epsilon isoform%2C transcript variant X1
XM_019905539.1	NW_017852064.1	1556.23	0.292883	0.00615508	E3 ubiquitin-protein ligase CHIP
XM_019916806.1	NW_017850747.1	2145.98	0.29255	0.00315525	RNA polymerase II-associated factor 1 homolog
XM_019907414.1	NW_017852103.1	2177.84	0.291452	0.00640295	importin-13
XM_019897721.1	NW_017851231.1	934.362	0.290814	0.00462389	leucine--tRNA ligase%2C cytoplasmic
XM_019911605.1	NW_017852279.1	2939.49	0.290411	4.31371e-05	nuclear migration protein nudC
XM_019909183.1	NW_017852143.1	3028.94	0.29019	0.0043325	histone H2A.V
XM_019917784.1	NW_017851174.1	2313.19	0.290136	0.000877743	ubiquitin-protein ligase E3C
XM_019910627.1	NW_017852245.1	36470	0.289156	0.00555186	longitudinals lacking protein%2C isoforms J/P/Q/S/Z%2C transcript variant X1
XM_019905327.1	NW_017852061.1	493.312	0.287773	0.00587813	lethal(3)malignant brain tumor-like protein 3%2C transcript variant X1
XM_019899333.1	NW_017851651.1	2125.15	0.287373	0.00794546	5'-nucleotidase domain-containing protein 1
XM_019905796.1	NW_017852073.1	2783.91	0.286747	0.000472026	cysteine protease ATG4B
XM_019917619.1	NW_017851170.1	2099.05	0.286647	5.86051e-05	inositol polyphosphate 5-phosphatase OCRL-1%2C transcript variant X1
XM_019910017.1	NW_017852168.1	60133.2	0.285662	0.00350379	60S ribosomal protein L5-like
XM_019910021.1	NW_017852168.1	1065.52	0.285403	0.00269402	oligoribonuclease-like
XM_019913867.1	NW_017852348.1	1463.66	0.285235	0.00114834	probable U3 small nucleolar RNA-associated protein 11
XM_019917547.1	NW_017851162.1	2110.08	0.285187	0.00168695	protein ABHD4-like
XM_019914406.1	NW_017852359.1	4146.85	0.284953	0.00434224	chromatin assembly factor 1 subunit A-like%2C transcript variant X1
XM_019901344.1	NW_017851860.1	6861.22	0.284358	0.0071563	T-complex protein 1 subunit eta-like
XM_019907722.1	NW_017852104.1	2354.26	0.283553	0.00395337	serine-arginine protein 55-like%2C transcript variant X1
XM_019910644.1	NW_017849390.1	1992.68	0.282602	0.00106749	FGFR1 oncogene partner 2 homolog
XM_019915048.1	NW_017852368.1	1093.16	0.281615	0.00775795	beta-catenin-like protein 1
XM_019908216.1	NW_017852110.1	878.775	0.281496	0.00483221	6-pyruvoyl tetrahydrobiopterin synthase%2C transcript variant X1
XM_019900479.1	NW_017851775.1	2041.71	0.280159	0.00555971	RE1-silencing transcription factor-like
XM_019912897.1	NW_017852320.1	2259.58	0.279752	0.0035086	pyruvate dehydrogenase [acetyl-transferring]-phosphatase 1%2C mitochondrial
XM_019905486.1	NW_017852064.1	1951.09	0.279711	0.00389932	monocarboxylate transporter 10-like%2C transcript variant X1
XM_019900951.1	NW_017851824.1	1134.41	0.277888	0.00577754	WD repeat-containing protein mio
XM_019908169.1	NW_017852110.1	666.549	0.277612	0.00804589	DNA replication licensing factor Mcm6
XM_019905798.1	NW_017852073.1	1505.73	0.277031	0.000718517	protein CWC15 homolog%2C transcript variant X1
XM_019904429.1	NW_017852040.1	1301.08	0.275924	0.00116488	golgin-45%2C transcript variant X1
XM_019906916.1	NW_017852091.1	1665.79	0.275875	0.00415374	stomatin-like protein 2%2C mitochondrial
XM_019916678.1	NW_017850520.1	5533.77	0.275319	7.59579e-05	secretion-regulating guanine nucleotide exchange factor-like
XM_019914706.1	NW_017850091.1	5534.29	0.275272	7.59579e-05	secretion-regulating guanine nucleotide exchange factor-like
XM_019911105.1	NW_017852258.1	3317.07	0.274261	0.00973865	zinc finger Ran-binding domain-containing protein 2%2C transcript variant X1
XM_019910027.1	NW_017852168.1	1844.44	0.274132	0.00189107	ribosomal protein S6 kinase 2 beta
XM_019903474.1	NW_017852029.1	4268.06	0.273916	0.00207761	DNA damage-binding protein 1%2C transcript variant X1
XM_019917447.1	NW_017851153.1	2285.87	0.273837	0.00481645	prefoldin subunit 1
XM_019910030.1	NW_017852168.1	23375.4	0.27344	0.00317396	60S ribosomal protein L18a
XM_019902740.1	NW_017852013.1	3574.53	0.272311	0.00471118	serine/threonine-protein kinase RIO1
XM_019897872.1	NW_017851260.1	1441.6	0.271945	0.00059989	uncharacterized LOC109532808
XM_019905094.1	NW_017852058.1	9171.2	0.271786	5.08247e-05	uncharacterized LOC109538054
XM_019911810.1	NW_017852296.1	2257.31	0.271505	0.000322198	dnaJ homolog subfamily C member 11
XM_019903684.1	NW_017852030.1	1619.9	0.271253	0.00221095	zinc finger HIT domain-containing protein 2
XM_019902478.1	NW_017852012.1	3776.04	0.268677	0.00132965	armadillo repeat-containing protein 6 homolog
XM_019916234.1	NW_017852381.1	9675.62	0.268563	0.0045279	MICOS complex subunit Mic60%2C transcript variant X1
XM_019903853.1	NW_017852034.1	2729.21	0.267575	0.00169572	ATP-dependent RNA helicase DHX36-like
XM_019916667.1	NW_017850500.1	1251.5	0.267244	0.00502468	polyphosphoinositide phosphatase-like
XM_019911125.1	NW_017852258.1	864.602	0.267217	0.00966781	mitochondrial ubiquitin ligase activator of NFKB 1
XM_019908130.1	NW_017852110.1	1415.64	0.266953	0.00666423	low molecular weight phosphotyrosine protein phosphatase 1-like
XM_019907891.1	NW_017852107.1	1743.1	0.26628	0.00749743	methyltransferase-like protein 13
XM_019916809.1	NW_017850761.1	1335.54	0.265902	0.0039469	polyphosphoinositide phosphatase-like
XM_019899772.1	NW_017851704.1	5616.98	0.265726	0.000863608	CDGSH iron-sulfur domain-containing protein 2 homolog
XM_019904232.1	NW_017852037.1	814.467	0.265372	0.00584793	presenilins-associated rhomboid-like protein%2C mitochondrial
XM_019904265.1	NW_017852037.1	2478.2	0.265266	1.05399e-07	F-box-like/WD repeat-containing protein TBL1XR1%2C transcript variant X1
XM_019902234.1	NW_017852003.1	1771.65	0.263923	0.0086221	protein FAM98A
XM_019902891.1	NW_017852017.1	2479.71	0.263615	4.77692e-05	rab GTPase-binding effector protein 1%2C transcript variant X1
XM_019903590.1	NW_017852030.1	2221.96	0.263576	0.00344706	uncharacterized protein C6orf136 homolog
XM_019900301.1	NW_017851749.1	1524.95	0.262873	0.00800349	polyphosphoinositide phosphatase-like
XM_019912404.1	NW_017852305.1	1565.29	0.260686	0.00227874	ubiquitin carboxyl-terminal hydrolase FAM188A homolog%2C transcript variant X1
XM_019915826.1	NW_017852380.1	5101.77	0.259804	0.000305219	phosphoribosyl pyrophosphate synthase-associated protein 2%2C transcript variant X1
XM_019906808.1	NW_017852091.1	1141.57	0.258579	0.00537881	mitochondrial folate transporter/carrier-like
XM_019906708.1	NW_017852086.1	1627.86	0.25675	0.00215821	mitochondrial assembly of ribosomal large subunit protein 1
XM_019915778.1	NW_017852380.1	1908.58	0.2559	0.00661827	U5 small nuclear ribonucleoprotein 40 kDa protein
XM_019913106.1	NW_017852328.1	1991.29	0.254658	0.00886023	probable nucleoporin Nup54
XM_019917699.1	NW_017851171.1	2263.99	0.253131	0.00447319	MOB kinase activator-like 4
XM_019905755.1	NW_017852072.1	1186.86	0.250924	0.00129564	cyclin-dependent kinase 2-like
XM_019899036.1	NW_017851619.1	795.993	0.248135	0.00634352	DNA-directed RNA polymerase III subunit RPC2-like
XR_002171484.1	NW_017851388.1	542.997	0.246798	0.00308797	uncharacterized LOC109533097
XM_019913311.1	NW_017852336.1	929.944	0.243167	0.000650586	tRNA (adenine(37)-N6)-methyltransferase-like%2C transcript variant X1
XM_019899802.1	NW_017851710.1	3628.49	0.241308	0.00143759	uncharacterized LOC109534221
XM_019908653.1	NW_017852117.1	1336.28	0.241194	0.00731371	nuclear cap-binding protein subunit 2-like
XM_019902198.1	NW_017852003.1	1917.68	0.240536	0.0085149	nurim homolog
XM_019916297.1	NW_017852381.1	2642.85	0.239064	0.00493414	COP9 signalosome complex subunit 7b%2C transcript variant X1
XR_002172040.1	NW_017852068.1	1462.79	0.237812	0.00929467	pleiotropic regulator 1%2C transcript variant X1
XM_019898138.1	NW_017851300.1	776.746	0.237765	0.00466642	zinc finger protein 287-like%2C transcript variant X1
XM_019899689.1	NW_017851694.1	981.948	0.236905	0.00688817	WD repeat-containing protein 20
XM_019916414.1	NW_017852382.1	7420.2	0.235736	0.00348787	ATP-dependent zinc metalloprotease YME1L1
XM_019900487.1	NW_017851775.1	3225.58	0.234379	0.00639458	small nuclear ribonucleoprotein-associated protein B
XM_019911986.1	NW_017852300.1	1033.4	0.233549	0.00798677	tRNA selenocysteine 1-associated protein 1
XM_019903564.1	NW_017852030.1	3286.86	0.231333	0.00346808	mitochondrial import inner membrane translocase subunit Tim23%2C transcript variant X1
XM_019907281.1	NW_017852100.1	3080	0.231215	0.00201447	protein IWS1 homolog
XM_019910731.1	NW_017852245.1	5654.31	0.227243	0.0037742	ras-related protein Rac1
XM_019911936.1	NW_017852300.1	4302.86	0.226991	8.29935e-07	cullin-1
XM_019914934.1	NW_017852366.1	1498.47	0.225837	0.0034896	protein transport protein SFT2
XM_019906761.1	NW_017852088.1	1663.95	0.223173	0.00831645	probable peroxisomal membrane protein PEX13
XM_019898453.1	NW_017851439.1	3512.27	0.222537	0.00627696	ubiquitin carboxyl-terminal hydrolase 5
XM_019899477.1	NW_017851666.1	2314.28	0.221434	0.00167851	uncharacterized LOC109533955%2C transcript variant X1
XM_019907367.1	NW_017852103.1	4060.77	0.220398	0.0042113	aminoacyl tRNA synthase complex-interacting multifunctional protein 2%2C transcript variant X1
XM_019909186.1	NW_017852145.1	2592.09	0.213803	0.0042113	set1/Ash2 histone methyltransferase complex subunit ASH2
XM_019899671.1	NW_017851694.1	3553.17	0.210631	0.00728702	28S ribosomal protein S5%2C mitochondrial
XM_019902569.1	NW_017852012.1	2357.2	0.207673	0.00324531	TM2 domain-containing protein almondex
XM_019905500.1	NW_017852064.1	24447.5	0.201318	0.00666423	eukaryotic translation initiation factor 5A%2C transcript variant X1
XM_019898615.1	NW_017851488.1	1039	0.200333	0.00868276	actin-related protein 10-like
XM_019911614.1	NW_017852279.1	13336.3	0.19647	0.00507743	importin subunit alpha-3
XM_019914303.1	NW_017852358.1	3353.75	0.142868	0.0077439	serine/threonine-protein phosphatase 4 catalytic subunit%2C transcript variant X1
XM_019904154.1	NW_017852037.1	2631.81	-0.175083	0.00192482	F-box/WD repeat-containing protein 5%2C transcript variant X1
XM_019899821.1	NW_017851713.1	2891.27	-0.190451	0.00521278	zinc finger CCCH domain-containing protein 10-like%2C transcript variant X1
XM_019905800.1	NW_017852073.1	5779.25	-0.191019	0.00439119	ras-related protein Rab-14%2C transcript variant X1
XM_019915842.1	NW_017852380.1	2558.23	-0.202596	0.00861766	testis-expressed sequence 2 protein
XM_019914851.1	NW_017852366.1	3668.58	-0.212324	0.000521323	splicing factor U2AF 50 kDa subunit
XM_019914434.1	NW_017852360.1	2785.38	-0.217466	0.00773705	guanine nucleotide-binding protein G(s) subunit alpha%2C transcript variant X1
XM_019912806.1	NW_017852313.1	1720.92	-0.223296	0.00965645	dual specificity mitogen-activated protein kinase kinase 7-like%2C transcript variant X1
XM_019898697.1	NW_017851516.1	3481.99	-0.223451	0.0071563	glycogen synthase kinase-3 beta-like
XM_019908915.1	NW_017852126.1	3521.83	-0.224279	0.00949501	DAZ-associated protein 2-like%2C transcript variant X1
XM_019910226.1	NW_017852181.1	8124.3	-0.225508	0.00550588	programmed cell death 6-interacting protein
XM_019903277.1	NW_017852026.1	11389.2	-0.227087	0.00192669	protein transport protein Sec23A%2C transcript variant X1
XM_019915925.1	NW_017852380.1	7439.21	-0.227538	0.00242387	putative RNA-binding protein Luc7-like 2%2C transcript variant X1
XM_019897952.1	NW_017851282.1	3631.18	-0.229002	0.00166226	protein MON2 homolog
XM_019908674.1	NW_017852117.1	2829	-0.232746	0.00106375	uncharacterized LOC109540328%2C transcript variant X1
XM_019908049.1	NW_017852109.1	3112.45	-0.233477	0.00783357	calcium channel flower%2C transcript variant X1
XM_019917258.1	NW_017851131.1	5054.55	-0.234485	0.00143122	cytosolic carboxypeptidase-like protein 5
XM_019916405.1	NW_017852382.1	7247.66	-0.236673	0.0030127	pre-mRNA-processing factor 39
XM_019917091.1	NW_017851087.1	3638.51	-0.239882	0.000479177	protein YIPF5
XM_019917259.1	NW_017851131.1	751.278	-0.242253	0.00219332	GA-binding protein subunit beta-2%2C transcript variant X1
XM_019907774.1	NW_017852106.1	9959.88	-0.248494	0.00768946	regulator of nonsense transcripts 1 homolog
XM_019915162.1	NW_017852369.1	5489.88	-0.249698	0.00135061	poly(A) polymerase type 3
XM_019901929.1	NW_017851949.1	2610.86	-0.250132	0.00681814	brain protein I3-like
XM_019913529.1	NW_017852339.1	2473.07	-0.250567	0.00285948	SH3 domain-containing RING finger protein 3%2C transcript variant X1
XM_019904359.1	NW_017852038.1	26929.1	-0.250637	0.00230877	profilin%2C transcript variant X1
XM_019917252.1	NW_017851125.1	1109.92	-0.251801	0.00494802	uncharacterized LOC109546337
XM_019909918.1	NW_017852166.1	2015.86	-0.251831	0.00613034	mesoderm induction early response protein 1-like
XM_019906259.1	NW_017852082.1	13559.6	-0.252116	0.00823132	uncharacterized LOC109538855%2C transcript variant X1
XM_019904140.1	NW_017852037.1	4678.4	-0.254018	0.00254392	multiple epidermal growth factor-like domains protein 8
XM_019909360.1	NW_017852166.1	1149.82	-0.25828	0.00107113	pyruvate dehydrogenase phosphatase regulatory subunit%2C mitochondrial-like%2C transcript variant X1
XM_019901011.1	NW_017851824.1	2991.56	-0.260429	0.000648892	cell cycle control protein 50A%2C transcript variant X1
XM_019910557.1	NW_017852238.1	2357.86	-0.262873	0.000541472	zinc finger protein 358-like
XM_019897947.1	NW_017851282.1	1558.83	-0.263173	0.00202663	guanylate kinase-like
XM_019903499.1	NW_017848011.1	627.262	-0.263299	0.00959614	putative U5 small nuclear ribonucleoprotein 200 kDa helicase
XM_019911879.1	NW_017852298.1	4316.7	-0.264776	0.000289158	THO complex subunit 2%2C transcript variant X1
XM_019899539.1	NW_017851680.1	2046.35	-0.267673	6.10381e-05	uncharacterized LOC109534003%2C transcript variant X1
XM_019909746.1	NW_017852166.1	4919.83	-0.269226	1.94354e-05	AP-2 complex subunit alpha%2C transcript variant X1
XM_019917535.1	NW_017851160.1	1336.11	-0.269761	0.00660731	PEST proteolytic signal-containing nuclear protein-like%2C transcript variant X1
XM_019905473.1	NW_017852064.1	481.619	-0.27127	0.000151723	triokinase/FMN cyclase-like
XM_019912614.1	NW_017852309.1	3666.86	-0.274173	0.000773453	uncharacterized LOC109543087%2C transcript variant X1
XM_019901412.1	NW_017851883.1	6844.38	-0.274235	0.00462235	CREB-binding protein%2C transcript variant X1
XM_019918218.1	NW_017851209.1	2879.36	-0.281675	0.00865265	TATA element modulatory factor%2C transcript variant X1
XM_019910343.1	NW_017852199.1	2194.38	-0.282363	0.00130275	ras association domain-containing protein 4-like
XM_019916506.1	NW_017852382.1	3178.87	-0.282906	3.27251e-05	BTB/POZ domain-containing protein 9%2C transcript variant X1
XM_019915861.1	NW_017852380.1	5402.64	-0.284075	0.00183177	fatty-acid amide hydrolase 2
XM_019908951.1	NW_017852126.1	17467.9	-0.284998	0.00149386	abhydrolase domain-containing protein 2
XM_019914234.1	NW_017852355.1	9803.07	-0.2867	0.00552475	eukaryotic translation initiation factor 3 subunit J
XM_019916763.1	NW_017850671.1	8401.12	-0.287179	0.00225353	spectrin beta chain-like
XM_019899123.1	NW_017851640.1	2737.32	-0.288492	0.000306016	gastrula zinc finger protein XlCGF57.1-like
XM_019901632.1	NW_017851931.1	1909.17	-0.289014	0.00575206	transmembrane protein 87A
XM_019899222.1	NW_017851651.1	4873.35	-0.289119	0.003442	uncharacterized LOC109533799%2C transcript variant X1
XM_019905169.1	NW_017852058.1	10186.5	-0.289815	0.00854937	glutathione S-transferase-like
XM_019909130.1	NW_017852139.1	1024.43	-0.291285	0.00956141	exocyst complex component 6-like
XM_019911799.1	NW_017852296.1	5416.43	-0.291854	0.00999566	arf-GAP domain and FG repeat-containing protein 1
XM_019908859.1	NW_017852126.1	7998.21	-0.291902	0.00949559	dynein heavy chain%2C cytoplasmic%2C transcript variant X1
XM_019906660.1	NW_017852086.1	4590.21	-0.293254	0.000537881	cyclin-G-associated kinase%2C transcript variant X1
XM_019898044.1	NW_017851282.1	2610.17	-0.293764	0.00269434	uncharacterized LOC109532906
XM_019902506.1	NW_017852012.1	11125.8	-0.293961	0.00103951	RNA-binding protein Nova-1%2C transcript variant X1
XM_019905387.1	NW_017852064.1	7102.78	-0.294224	0.00806004	ubiquitin carboxyl-terminal hydrolase 7
XM_019911261.1	NW_017852263.1	3962.29	-0.295211	0.00119373	septin-1
XM_019916081.1	NW_017852381.1	2816.24	-0.296646	0.000176373	DNA-directed RNA polymerase II subunit RPB2%2C transcript variant X1
XM_019910290.1	NW_017852191.1	5210.71	-0.296712	0.00111195	putative U5 small nuclear ribonucleoprotein 200 kDa helicase
XM_019907295.1	NW_017852102.1	1939.69	-0.296753	0.00267968	CD82 antigen-like%2C transcript variant X1
XM_019909590.1	NW_017852166.1	4438.35	-0.297151	0.00411498	lysine-specific demethylase lid%2C transcript variant X1
XM_019911158.1	NW_017852259.1	5153.05	-0.297745	0.00124445	uncharacterized LOC109542101
XM_019906037.1	NW_017852073.1	2802.66	-0.297878	0.00374942	division abnormally delayed protein
XM_019900500.1	NW_017847165.1	10092.8	-0.301207	0.0015449	spectrin beta chain-like
XM_019912892.1	NW_017852320.1	1778.66	-0.302186	0.00478574	UV radiation resistance-associated gene protein%2C transcript variant X1
XM_019901684.1	NW_017851937.1	2641.6	-0.303653	0.000220665	zinc finger protein 569-like%2C transcript variant X1
XM_019900152.1	NW_017851737.1	10067.6	-0.304699	0.0018113	CCR4-NOT transcription complex subunit 1%2C transcript variant X1
XM_019918105.1	NW_017851192.1	3502.7	-0.305877	0.00940513	ADP-ribosylation factor GTPase-activating protein 2%2C transcript variant X1
XM_019917081.1	NW_017851087.1	2962.31	-0.307258	1.14617e-05	centrosome-associated zinc finger protein CP190
XM_019900424.1	NW_017851769.1	10443.3	-0.307648	0.00122626	spectrin beta chain-like
XM_019912449.1	NW_017852305.1	2362.19	-0.307699	0.00470439	ATP-dependent RNA helicase dbp2-like
XM_019917917.1	NW_017851181.1	5853.45	-0.307925	0.00969076	protein zyg-11 homolog
XM_019898118.1	NW_017851291.1	2811.1	-0.307984	0.00700418	cyclin-K-like
XM_019914321.1	NW_017850023.1	4040.5	-0.309626	0.00101649	putative U5 small nuclear ribonucleoprotein 200 kDa helicase
XM_019898356.1	NW_017851403.1	10041.2	-0.313539	0.00511563	repressor of RNA polymerase III transcription MAF1 homolog
XM_019901626.1	NW_017851931.1	3265.62	-0.314147	0.0025748	TBC1 domain family member 23
XM_019904219.1	NW_017852037.1	1992.5	-0.314951	0.00188729	sorting nexin-20%2C transcript variant X1
XM_019909998.1	NW_017852168.1	12570.1	-0.315237	0.000671622	thymosin beta%2C transcript variant X1
XM_019901906.1	NW_017851949.1	1988.85	-0.315333	0.000318648	GRAM domain-containing protein 1B-like
XM_019905719.1	NW_017852070.1	3456.43	-0.319013	0.00133549	DENN domain-containing protein 5B
XM_019909478.1	NW_017852166.1	4403.34	-0.320031	0.00206422	cytoplasmic FMR1-interacting protein
XM_019905295.1	NW_017852061.1	2460.22	-0.320819	6.02183e-06	uncharacterized protein CG5098%2C transcript variant X1
XM_019915414.1	NW_017852371.1	2724.22	-0.322867	0.000386969	protein daughterless%2C transcript variant X1
XM_019897816.1	NW_017851241.1	2851.21	-0.323224	0.00844125	phosphatidylinositol 4-kinase beta
XM_019899346.1	NW_017851651.1	3792.98	-0.324835	0.000413941	potential E3 ubiquitin-protein ligase ariadne-1-like
XM_019913890.1	NW_017852348.1	4095.69	-0.326632	0.000131906	insulin-degrading enzyme
XM_019899968.1	NW_017851724.1	24667	-0.327625	0.00601853	serine/threonine-protein kinase MARK2-like%2C transcript variant X1
XM_019912824.1	NW_017852313.1	7236.7	-0.327967	0.00999615	protein phosphatase 1 regulatory subunit 15B%2C transcript variant X1
XM_019902595.1	NW_017852012.1	3521.17	-0.327975	0.0020811	transmembrane protein 192
XM_019898502.1	NW_017851452.1	1842.55	-0.328002	0.000620702	negative elongation factor D%2C transcript variant X1
XM_019901914.1	NW_017851949.1	7126.23	-0.328212	0.00185793	E3 ubiquitin-protein ligase znrf1%2C transcript variant X1
XM_019910188.1	NW_017852178.1	2267.27	-0.328256	0.0019541	uncharacterized LOC109541342%2C transcript variant X1
XM_019916077.1	NW_017852381.1	3330.9	-0.328695	0.00840171	rho guanine nucleotide exchange factor 5%2C transcript variant X1
XM_019900574.1	NW_017851775.1	1264.29	-0.329555	0.00395996	sphingomyelin synthase-related 1-like
XM_019903790.1	NW_017852032.1	2334.77	-0.332703	0.00349886	G protein alpha i subunit
XM_019902553.1	NW_017852012.1	2461.13	-0.332808	0.00933694	RE1-silencing transcription factor-like
XM_019907338.1	NW_017852103.1	10543.4	-0.332867	0.000265919	kinesin heavy chain%2C transcript variant X1
XM_019905610.1	NW_017852067.1	3196.9	-0.334215	0.00412113	uncharacterized LOC109538396%2C transcript variant X1
XM_019901688.1	NW_017851937.1	1564.8	-0.335196	0.000425052	zinc finger protein 2 homolog
XM_019898912.1	NW_017851599.1	2018.41	-0.335253	0.00170446	tyrosine-protein kinase PR2%2C transcript variant X1
XM_019917791.1	NW_017851174.1	5317.36	-0.335815	0.00253702	1-acyl-sn-glycerol-3-phosphate acyltransferase gamma-like
XM_019918255.1	NW_017851223.1	4553.69	-0.335843	0.00609822	AMMECR1-like protein%2C transcript variant X1
XM_019914784.1	NW_017850103.1	1071.08	-0.337168	0.00454785	UPF0536 protein C12orf66 homolog
XM_019900031.1	NW_017851724.1	3925.81	-0.337339	0.00809681	rap guanine nucleotide exchange factor 6
XM_019906894.1	NW_017852091.1	2286.66	-0.337742	0.00186742	pre-mRNA-splicing factor 38B%2C transcript variant X1
XM_019904524.1	NW_017852043.1	18685.4	-0.338632	0.00175068	puromycin-sensitive aminopeptidase
XM_019909474.1	NW_017852166.1	4167.95	-0.338673	0.000189954	uncharacterized LOC109540928%2C transcript variant X1
XM_019907635.1	NW_017852104.1	7235.26	-0.339154	0.00800136	WD repeat-containing protein 44%2C transcript variant X1
XM_019900533.1	NW_017851775.1	13885.1	-0.343297	7.83431e-05	tetratricopeptide repeat protein 14 homolog%2C transcript variant X1
XM_019916704.1	NW_017850561.1	376.544	-0.344544	0.00928712	signal-induced proliferation-associated 1-like protein 2
XM_019902585.1	NW_017852012.1	5297.59	-0.344831	0.00829071	atlastin
XM_019897951.1	NW_017851282.1	744.207	-0.34585	0.00117853	putative Dol-P-Glc:Glc(2)Man(9)GlcNAc(2)-PP-Dol alpha-1%2C2-glucosyltransferase
XM_019909851.1	NW_017852166.1	3385.06	-0.34727	0.000984515	uncharacterized LOC109541114
XM_019916998.1	NW_017851084.1	18065.4	-0.347929	0.00328401	spectrin alpha chain%2C transcript variant X1
XM_019913116.1	NW_017852328.1	6045.52	-0.348725	1.37095e-06	F-box only protein 28-like%2C transcript variant X1
XM_019909582.1	NW_017852166.1	3483.51	-0.348768	1.69693e-05	ADP-ribosylation factor 6
XM_019903693.1	NW_017852030.1	1847.71	-0.350035	4.82652e-05	ankyrin repeat domain-containing protein 50%2C transcript variant X1
XM_019909660.1	NW_017852166.1	6404.65	-0.351114	0.000198155	IQ motif and SEC7 domain-containing protein 1%2C transcript variant X1
XM_019912411.1	NW_017852305.1	17738.3	-0.351976	0.00824579	clathrin heavy chain
XM_019902427.1	NW_017852012.1	3315.45	-0.352189	0.00255896	bromodomain adjacent to zinc finger domain protein 2B%2C transcript variant X1
XM_019908616.1	NW_017852117.1	3440.5	-0.352831	0.000479177	signal transducer and activator of transcription 5B%2C transcript variant X1
XM_019914172.1	NW_017852353.1	3554.06	-0.35306	0.000474648	prefoldin subunit 2
XM_019913958.1	NW_017852350.1	3586.27	-0.353082	0.00751793	transcription-associated protein 1%2C transcript variant X1
XM_019914507.1	NW_017852363.1	9523.31	-0.354839	0.00023904	armadillo segment polarity protein%2C transcript variant X1
XM_019904010.1	NW_017852037.1	1835.44	-0.355715	0.00443104	uncharacterized LOC109537347%2C transcript variant X1
XM_019904991.1	NW_017852056.1	5139.07	-0.356278	0.000298844	ubiquitin-conjugating enzyme E2 H%2C transcript variant X1
XM_019915852.1	NW_017852380.1	708.276	-0.357146	0.00380543	protein aveugle
XM_019902210.1	NW_017852003.1	6660.12	-0.35757	0.00240885	pre-mRNA-processing-splicing factor 8
XM_019898952.1	NW_017851611.1	416.175	-0.35841	0.00721743	tetratricopeptide repeat protein 5-like
XM_019914153.1	NW_017852351.1	2076.37	-0.358492	0.00182447	uncharacterized LOC109544113%2C transcript variant X1
XM_019913878.1	NW_017852348.1	3060.53	-0.358494	0.00017625	protein TAPT1 homolog%2C transcript variant X1
XM_019915887.1	NW_017852380.1	3355.76	-0.358957	0.000126777	uncharacterized LOC109545289%2C transcript variant X1
XM_019915481.1	NW_017852371.1	5655.45	-0.360206	0.000116776	transmembrane emp24 domain-containing protein bai
XM_019916542.1	NW_017852383.1	7657.95	-0.360292	0.00173463	RB1-inducible coiled-coil protein 1%2C transcript variant X1
XM_019908873.1	NW_017852126.1	1074.89	-0.360334	0.000442971	lysM and putative peptidoglycan-binding domain-containing protein 3
XM_019915204.1	NW_017850216.1	1632.41	-0.36047	2.17045e-05	ragulator complex protein LAMTOR1
XM_019902994.1	NW_017852017.1	5747.23	-0.360498	0.00588312	transcription elongation factor SPT6
XM_019901213.1	NW_017851842.1	1738.96	-0.360684	0.00268487	uncharacterized LOC109535327%2C transcript variant X1
XM_019901973.1	NW_017851955.1	615.833	-0.36095	0.00671155	zinc finger protein 678-like
XM_019900100.1	NW_017851729.1	615.249	-0.362963	0.00610199	zinc finger protein 678-like
XM_019899904.1	NW_017851724.1	3255.48	-0.364415	0.000904714	putative leucine-rich repeat-containing protein DDB_G0290503
XM_019913022.1	NW_017852324.1	3487.35	-0.36465	0.00720142	disintegrin and metalloproteinase domain-containing protein 10
XM_019915146.1	NW_017852369.1	3810.73	-0.365159	0.00886023	calpain-A-like%2C transcript variant X1
XM_019916674.1	NW_017850504.1	526.123	-0.366121	0.00695984	uncharacterized LOC109545832
XM_019908967.1	NW_017852126.1	501.446	-0.366409	5.64374e-06	synaptic vesicle 2-related protein
XM_019901275.1	NW_017851853.1	2539.28	-0.366631	0.00675269	zinc finger protein 587-like
XM_019902360.1	NW_017852012.1	1420.55	-0.367269	0.00228034	uncharacterized LOC109536244%2C transcript variant X1
XM_019904733.1	NW_017852055.1	7958.88	-0.368287	0.00219332	dyslexia-associated protein KIAA0319-like protein
XM_019907771.1	NW_017852106.1	5361.94	-0.36842	0.00312872	protein crumbs%2C transcript variant X1
XM_019898962.1	NW_017851612.1	2763.35	-0.368844	0.00291724	multidrug resistance-associated protein 1%2C transcript variant X1
XM_019907350.1	NW_017852103.1	6138.95	-0.368921	0.00266283	histone-lysine N-methyltransferase 2E%2C transcript variant X1
XM_019900638.1	NW_017851783.1	2069.15	-0.369134	2.18989e-05	serine/threonine-protein phosphatase 4 regulatory subunit 3%2C transcript variant X1
XM_019905136.1	NW_017852058.1	2174.64	-0.369467	0.00314323	RING finger and SPRY domain-containing protein 1-like
XM_019918082.1	NW_017851187.1	536.569	-0.36999	0.00655476	zinc finger Y-chromosomal protein 2-like%2C transcript variant X1
XM_019906902.1	NW_017852091.1	1885.5	-0.372224	0.00711833	D-glucuronyl C5-epimerase%2C transcript variant X1
XM_019914342.1	NW_017852358.1	473.172	-0.37247	5.52162e-05	uncharacterized LOC109544253
XM_019900929.1	NW_017851823.1	2231.36	-0.372524	2.59083e-06	high mobility group protein 20A-like
XM_019904175.1	NW_017852037.1	5276.73	-0.373379	0.00850572	tyrosine-protein phosphatase non-receptor type 23
XM_019899212.1	NW_017851651.1	3588.35	-0.373417	0.00712614	latrophilin Cirl%2C transcript variant X1
XM_019914558.1	NW_017852366.1	7108.27	-0.373511	0.00476479	protein split ends%2C transcript variant X1
XM_019906099.1	NW_017852074.1	3885.59	-0.374434	0.00132457	zinc/cadmium resistance protein-like
XM_019916347.1	NW_017852381.1	5991.1	-0.375128	0.00378333	NECAP-like protein CG9132
XM_019907910.1	NW_017852107.1	2641.17	-0.376602	0.00795243	zinc finger protein OZF-like%2C transcript variant X1
XM_019917345.1	NW_017851138.1	825.609	-0.377315	0.00631441	uncharacterized LOC109546394%2C transcript variant X1
XM_019899593.1	NW_017851689.1	1611.77	-0.377842	2.24659e-05	zinc finger protein 569%2C transcript variant X1
XM_019902444.1	NW_017852012.1	4156.23	-0.378148	0.000783965	uncharacterized LOC109536289
XM_019917469.1	NW_017851157.1	6413.36	-0.380129	0.000886611	translation initiation factor IF-2-like
XM_019916099.1	NW_017852381.1	6035.25	-0.380271	0.00674981	dual specificity testis-specific protein kinase 2%2C transcript variant X1
XM_019915767.1	NW_017852380.1	3176.87	-0.380456	0.000298806	E3 ubiquitin-protein ligase SMURF1%2C transcript variant X1
XM_019899163.1	NW_017851647.1	2030.56	-0.380695	0.000373504	uncharacterized LOC109533758%2C transcript variant X1
XM_019898338.1	NW_017846528.1	2031.95	-0.381244	0.000377913	uncharacterized LOC109533104%2C transcript variant X1
XM_019907453.1	NW_017852103.1	3801.11	-0.382261	0.00314425	dnaJ homolog dnj-5
XM_019901418.1	NW_017851883.1	2098.52	-0.382281	0.00210649	probable phospholipid-transporting ATPase VD
XM_019911745.1	NW_017852294.1	799.516	-0.38313	0.000318834	transient receptor potential channel pyrexia
XM_019898982.1	NW_017851612.1	2880.67	-0.383206	1.53442e-05	superkiller viralicidic activity 2-like 2
XM_019906113.1	NW_017852075.1	387.995	-0.383496	0.00838606	uncharacterized LOC109538740
XM_019897781.1	NW_017851239.1	4161.78	-0.383609	0.00937085	myb-related protein B%2C transcript variant X1
XM_019901378.1	NW_017851876.1	2636.31	-0.383961	0.00282288	phosphatidylinositol phosphatase PTPRQ-like%2C transcript variant X1
XM_019915368.1	NW_017852371.1	12063.6	-0.384567	0.00424877	transmembrane protease serine 9-like
XM_019909271.1	NW_017852156.1	1004.19	-0.384944	0.00223756	gamma-secretase subunit Aph-1
XM_019903192.1	NW_017852021.1	6360.12	-0.38504	0.00264004	derlin-2
XM_019908731.1	NW_017852120.1	7389.75	-0.385636	0.000883555	autophagy-related protein 9A%2C transcript variant X1
XM_019910355.1	NW_017852201.1	1790.36	-0.386795	0.000711843	histone-lysine N-methyltransferase 2C-like
XM_019906540.1	NW_017852084.1	352.359	-0.386944	0.00694703	rho GTPase-activating protein 26-like
XM_019916450.1	NW_017852382.1	3295.68	-0.387037	0.00224094	BSD domain-containing protein 1-A-like%2C transcript variant X1
XM_019908920.1	NW_017852126.1	2819.19	-0.387645	0.00454188	oxysterol-binding protein-related protein 9%2C transcript variant X1
XM_019899207.1	NW_017851651.1	17035	-0.387902	0.00312787	E3 ubiquitin-protein ligase HUWE1%2C transcript variant X1
XR_002171799.1	NW_017852003.1	97.1131	-0.388037	0.00764432	uncharacterized LOC109536116
XM_019913186.1	NW_017852328.1	3865.9	-0.388349	0.00173894	heterogeneous nuclear ribonucleoprotein A1%2C A2/B1 homolog%2C transcript variant X1
XM_019908004.1	NW_017852108.1	2999.53	-0.388687	0.00458168	uncharacterized LOC109539922%2C transcript variant X1
XM_019910844.1	NW_017849417.1	7177.74	-0.390522	0.00265754	protein TIS11-like
XM_019905138.1	NW_017852058.1	1165.02	-0.391208	0.00514428	nuclear hormone receptor FTZ-F1%2C transcript variant X1
XM_019903700.1	NW_017852030.1	3322.3	-0.391927	1.92853e-05	protein PAT1 homolog 1
XM_019910109.1	NW_017852173.1	4946.99	-0.394637	0.000230271	ankyrin repeat domain-containing protein 12%2C transcript variant X1
XM_019916258.1	NW_017852381.1	2774.84	-0.395144	0.000869914	uncharacterized LOC109545511
XM_019917120.1	NW_017851087.1	7988.55	-0.3959	0.00367098	actin-binding LIM protein 1
XM_019900304.1	NW_017851751.1	5479.28	-0.396689	0.0026224	dmX-like protein 2
XM_019913145.1	NW_017852328.1	428.543	-0.397144	0.00478574	uncharacterized LOC109543432
XM_019906437.1	NW_017852083.1	2716.15	-0.397319	0.000556844	uncharacterized protein CG7065-like%2C transcript variant X1
XM_019916776.1	NW_017845868.1	680.173	-0.397804	0.00491655	uncharacterized LOC109545931
XM_019914164.1	NW_017852353.1	2189.52	-0.398558	0.000396275	male-specific lethal 1 homolog
XM_019908753.1	NW_017852121.1	2476.53	-0.398636	0.00694366	myotubularin-related protein 8
XM_019906696.1	NW_017852086.1	3279.92	-0.401039	0.00131411	regulator of G-protein signaling 11%2C transcript variant X1
XM_019901737.1	NW_017851937.1	2431.91	-0.403133	0.000240743	rho GTPase-activating protein 190
XM_019901617.1	NW_017851930.1	3593.65	-0.404154	0.00622493	tubulin-specific chaperone cofactor E-like protein
XM_019899670.1	NW_017851694.1	7782.25	-0.406733	9.91822e-05	ran-binding protein 9
XM_019901431.1	NW_017851888.1	4737.53	-0.407402	0.00244623	sorting nexin lst-4%2C transcript variant X1
XM_019909367.1	NW_017852166.1	3363.47	-0.407619	0.000373504	SAFB-like transcription modulator
XM_019903487.1	NW_017848008.1	1638.55	-0.407659	0.00136634	probable phospholipid-transporting ATPase VA
XM_019899063.1	NW_017851632.1	645.781	-0.40795	0.000379351	threonine aspartase 1
XM_019910446.1	NW_017852220.1	1719.15	-0.40814	4.45068e-05	slit homolog 3 protein-like
XM_019905280.1	NW_017852061.1	2201.12	-0.408414	0.00228692	rap1 GTPase-GDP dissociation stimulator 1-B
XM_019909373.1	NW_017852166.1	1046.79	-0.409266	7.86979e-06	protein DENND6A%2C transcript variant X1
XM_019913278.1	NW_017852336.1	2553.82	-0.409441	0.00049006	rho guanine nucleotide exchange factor 18%2C transcript variant X1
XM_019901645.1	NW_017851937.1	1470.93	-0.410611	0.00331654	dosage compensation regulator
XM_019911790.1	NW_017852296.1	3584.86	-0.411449	0.00105627	uncharacterized LOC109542535%2C transcript variant X1
XM_019909096.1	NW_017852128.1	1125.33	-0.411654	0.000206975	INO80 complex subunit D
XM_019912447.1	NW_017852305.1	3386.84	-0.412499	0.0038188	protein retinal degeneration B
XM_019916464.1	NW_017852382.1	2347.71	-0.413701	0.00284429	DNA-directed RNA polymerase III subunit RPC7
XM_019906098.1	NW_017852074.1	2708.98	-0.414278	0.00254964	zinc/cadmium resistance protein-like
XM_019900332.1	NW_017851755.1	4956.97	-0.415076	0.00440236	ubiquitin-like protein 3
XM_019900926.1	NW_017851823.1	2444.98	-0.415378	0.0071563	protein fork head
XM_019901295.1	NW_017851859.1	3981.7	-0.416335	0.000305104	protein pangolin%2C isoforms A/H/I/S%2C transcript variant X1
XM_019907707.1	NW_017852104.1	928.746	-0.416382	6.74835e-05	splicing regulator RBM11
XM_019903841.1	NW_017852034.1	3027.83	-0.416529	8.98281e-06	AT-rich interactive domain-containing protein 4B%2C transcript variant X1
XM_019898489.1	NW_017851445.1	2608.39	-0.417938	0.000178923	vacuolar protein sorting-associated protein 18 homolog%2C transcript variant X1
XM_019906243.1	NW_017852082.1	1249.91	-0.418963	0.00206422	dedicator of cytokinesis protein 7-like
XM_019909505.1	NW_017852166.1	4980.76	-0.419231	0.00372215	plexin A3%2C transcript variant X1
XM_019916437.1	NW_017852382.1	7870.22	-0.419476	0.00639279	peptidyl-prolyl cis-trans isomerase FKBP8%2C transcript variant X1
XM_019910123.1	NW_017852175.1	9489.69	-0.419769	0.00136991	protein TIS11-like%2C transcript variant X1
XM_019907874.1	NW_017852107.1	10010	-0.420159	2.96587e-05	FERM%2C RhoGEF and pleckstrin domain-containing protein 2%2C transcript variant X1
XM_019915639.1	NW_017852377.1	8645.2	-0.420189	0.0020811	endoplasmic reticulum metallopeptidase 1%2C transcript variant X1
XM_019912650.1	NW_017852311.1	2379.07	-0.423351	0.000616892	E3 ubiquitin-protein ligase RFWD2-like
XM_019900150.1	NW_017851737.1	1445.53	-0.423622	0.000236937	bladder cancer-associated protein
XM_019913359.1	NW_017849803.1	2670.62	-0.424538	0.000196774	vacuolar protein sorting-associated protein 18 homolog%2C transcript variant X1
XM_019910980.1	NW_017852254.1	32272	-0.425086	0.000390043	activating transcription factor of chaperone%2C transcript variant X1
XM_019901972.1	NW_017851955.1	1119.89	-0.425883	0.000863608	uncharacterized LOC109535930
XM_019907477.1	NW_017852103.1	3748.29	-0.426411	0.00378188	TBC1 domain family member 9
XM_019916059.1	NW_017852381.1	1302.62	-0.428421	0.000152799	calmodulin-binding transcription activator 2-like
XM_019909147.1	NW_017852139.1	2874.32	-0.428441	0.00601639	sorting nexin-4-like%2C transcript variant X1
XM_019902034.1	NW_017847645.1	1530.06	-0.431115	0.00045552	probable phospholipid-transporting ATPase VD
XM_019905003.1	NW_017852056.1	681.861	-0.432058	0.000702347	mothers against decapentaplegic homolog 4
XM_019913583.1	NW_017849874.1	201.876	-0.432075	0.00362332	rho GTPase-activating protein 42-like
XM_019912344.1	NW_017852302.1	651.239	-0.433783	4.87745e-05	protein NRDE2 homolog
XM_019900317.1	NW_017851753.1	5508.68	-0.433851	6.06498e-06	maternal protein tudor-like%2C transcript variant X1
XM_019901682.1	NW_017851937.1	1999.63	-0.434428	0.00519178	protein patched homolog 1-like
XM_019909637.1	NW_017852166.1	5604.83	-0.435214	3.10985e-05	phospholipid scramblase 2%2C transcript variant X1
XM_019909553.1	NW_017852166.1	11256.4	-0.435226	0.00545406	dnaJ protein homolog 1
XM_019912184.1	NW_017852302.1	6062.25	-0.4357	0.000604971	cytoplasmic dynein 1 intermediate chain%2C transcript variant X1
XM_019912645.1	NW_017852311.1	4727.24	-0.438155	1.70406e-05	structural maintenance of chromosomes protein 3
XM_019908207.1	NW_017852110.1	9541.11	-0.439911	0.00775006	uncharacterized LOC109540050
XM_019913619.1	NW_017852340.1	1035.52	-0.44026	0.00346808	mediator of RNA polymerase II transcription subunit 31%2C transcript variant X1
XM_019903042.1	NW_017852017.1	3229.02	-0.441467	0.00483113	zinc finger protein 665-like%2C transcript variant X1
XM_019909801.1	NW_017852166.1	31543.2	-0.442352	0.000167535	BCL2/adenovirus E1B 19 kDa protein-interacting protein 3%2C transcript variant X1
XM_019901635.1	NW_017851932.1	167.084	-0.442653	0.00657767	tyrosine-protein kinase Fer-like
XM_019917396.1	NW_017851149.1	7868.26	-0.443311	0.00946979	sortilin-related receptor-like
XM_019901388.1	NW_017851876.1	1178.98	-0.446294	0.000654082	protein lap4-like
XM_019903731.1	NW_017852030.1	1456.09	-0.446556	0.000683029	kelch-like protein 5%2C transcript variant X1
XM_019907509.1	NW_017852103.1	3238.35	-0.446804	0.000140577	sorting nexin-29-like
XM_019902923.1	NW_017852017.1	2974.84	-0.447404	2.10123e-05	synaptogyrin-1
XM_019904971.1	NW_017852056.1	5315.35	-0.447541	6.47224e-05	PRA1 family protein 3
XM_019903720.1	NW_017852030.1	1467.58	-0.447932	0.00437273	homeobox protein cut%2C transcript variant X1
XM_019906771.1	NW_017852089.1	2409.41	-0.448038	0.0018113	nuclear factor related to kappa-B-binding protein
XM_019910424.1	NW_017852214.1	1646.7	-0.448083	0.00597879	acyl-CoA Delta(11) desaturase-like%2C transcript variant X1
XM_019910679.1	NW_017852245.1	5128.07	-0.448935	8.52465e-05	cyclin-dependent kinase 14%2C transcript variant X1
XM_019897828.1	NW_017851242.1	2150.04	-0.449177	0.000369201	probable ATP-dependent RNA helicase DDX56
XM_019911688.1	NW_017852287.1	2628.38	-0.449396	0.00665575	low-density lipoprotein receptor-related protein 2-like
XM_019909426.1	NW_017852166.1	3945.59	-0.44948	6.01473e-08	trafficking protein particle complex subunit 8
XM_019910046.1	NW_017852172.1	447.592	-0.449898	0.00375966	uncharacterized LOC109541246
XM_019909439.1	NW_017849234.1	2373.13	-0.450124	0.00740408	tubulin-specific chaperone cofactor E-like protein
XM_019915746.1	NW_017852378.1	1830.41	-0.452061	0.000122157	probable cation-transporting ATPase 13A3
XM_019909307.1	NW_017852160.1	925.847	-0.452077	0.00145998	uncharacterized LOC109540816
XM_019906998.1	NW_017852095.1	5038.93	-0.452424	0.00560788	X-box-binding protein 1%2C transcript variant X1
XM_019918071.1	NW_017851187.1	2689.89	-0.452489	4.31371e-05	activin receptor type-1%2C transcript variant X1
XM_019905254.1	NW_017852059.1	5787.32	-0.452773	5.54405e-05	heat shock protein 75 kDa%2C mitochondrial
XM_019918083.1	NW_017851187.1	7552.46	-0.45282	2.50701e-06	protein bicaudal D
XM_019912679.1	NW_017845697.1	10468.3	-0.453013	0.00835258	sortilin-related receptor-like
XM_019910846.1	NW_017852245.1	27806.1	-0.454573	0.0071209	stress-associated endoplasmic reticulum protein 2
XR_002172317.1	NW_017852180.1	2580.7	-0.45502	0.000581242	uncharacterized LOC109541368
XM_019907069.1	NW_017852096.1	9114.96	-0.455434	0.00168512	protein lifeguard 1-like%2C transcript variant X1
XM_019911597.1	NW_017852279.1	1580.51	-0.456258	2.50982e-05	sorting nexin-13-like%2C transcript variant X1
XM_019903544.1	NW_017848023.1	1122.56	-0.45627	0.000244758	probable cation-transporting ATPase 13A3
XM_019910130.1	NW_017852176.1	9686.63	-0.456325	0.00209747	dnaJ homolog subfamily B member 6%2C transcript variant X1
XM_019909555.1	NW_017852166.1	3996.03	-0.456472	0.00201447	histone-lysine N-methyltransferase%2C H3 lysine-79 specific-like%2C transcript variant X1
XR_002172161.1	NW_017849039.1	1104.67	-0.456498	9.13262e-05	uncharacterized LOC109540124
XM_019904606.1	NW_017852049.1	6798.77	-0.457378	0.0031515	SH3 domain-binding protein 5 homolog%2C transcript variant X1
XM_019910219.1	NW_017852180.1	258.778	-0.457543	0.00198739	myotubularin-related protein 13-like
XM_019910159.1	NW_017852178.1	3451.68	-0.457724	0.000126149	Golgi-specific brefeldin A-resistance guanine nucleotide exchange factor 1%2C transcript variant X1
XM_019899941.1	NW_017851724.1	11039	-0.459142	7.73428e-05	rho guanine nucleotide exchange factor 12%2C transcript variant X1
XM_019899836.1	NW_017851713.1	2461.96	-0.460085	0.000839034	schwannomin-interacting protein 1 homolog%2C transcript variant X1
XM_019907112.1	NW_017848922.1	1378.58	-0.461442	0.00173097	ras-related protein Rab-39B-like
XM_019915062.1	NW_017852369.1	1313.71	-0.461459	0.000220432	tyrosine-protein kinase Abl-like
XM_019905629.1	NW_017852068.1	2326.01	-0.463208	0.00021854	sex determination protein fruitless%2C transcript variant X1
XM_019911654.1	NW_017852283.1	2685.28	-0.463557	0.00331678	cell surface glycoprotein 1-like
XM_019904008.1	NW_017852037.1	1654.83	-0.464252	0.000378737	zinc finger protein 665-like
XM_019900262.1	NW_017847028.1	541.679	-0.464284	0.00258972	cyclic AMP response element-binding protein A-like%2C transcript variant X1
XM_019899446.1	NW_017851659.1	583.124	-0.46445	5.6837e-05	ras-related protein Rab-27A
XM_019915406.1	NW_017852371.1	7735.12	-0.46534	0.00152749	autophagy-related protein 2 homolog B
XM_019901555.1	NW_017851924.1	7259.14	-0.465424	0.0008568	eukaryotic translation initiation factor 4 gamma 2-like
XM_019910115.1	NW_017852173.1	859.956	-0.465502	8.83106e-05	transcriptional repressor protein YY1-like%2C transcript variant X1
XM_019911716.1	NW_017852289.1	2484	-0.466742	0.00324531	uncharacterized LOC109542474
XM_019904826.1	NW_017852056.1	4916.08	-0.46743	0.00661827	solute carrier family 12 member 8
XM_019903523.1	NW_017852030.1	1797.87	-0.467819	0.000424424	intersectin-1-like%2C transcript variant X1
XM_019915748.1	NW_017852378.1	789.37	-0.46792	0.000745311	probable cation-transporting ATPase 13A4
XM_019916699.1	NW_017850558.1	945.628	-0.468218	0.00855962	serine/threonine-protein kinase 3-like
XM_019912661.1	NW_017852311.1	2939.03	-0.470003	0.000161568	peroxisomal membrane protein 11C
XM_019909916.1	NW_017852166.1	299.814	-0.470514	0.00200291	uncharacterized LOC109541150%2C transcript variant X1
XM_019899155.1	NW_017851647.1	5088.27	-0.472063	0.000732795	myosin-VIIa%2C transcript variant X1
XM_019898021.1	NW_017851282.1	4921.24	-0.472833	0.00725052	chromodomain-helicase-DNA-binding protein 1%2C transcript variant X1
XM_019905988.1	NW_017852073.1	1589.76	-0.47296	0.000594644	putative Polycomb group protein ASXL3%2C transcript variant X1
XM_019908900.1	NW_017852126.1	6121.71	-0.474048	0.00072647	DNA-directed RNA polymerase II subunit RPB1
XM_019900783.1	NW_017851814.1	11425.1	-0.474363	0.000474963	E3 ubiquitin-protein ligase UBR2
XM_019913784.1	NW_017852343.1	5766.26	-0.474478	0.00112789	nuclear receptor coactivator 2%2C transcript variant X1
XM_019911300.1	NW_017852265.1	824.519	-0.475048	0.000820517	phosphatidylinositol 3%2C4%2C5-trisphosphate 3-phosphatase and dual-specificity protein phosphatase PTEN%2C transcript variant X1
XM_019916425.1	NW_017852382.1	10418	-0.475414	0.00102617	transmembrane protein 214-A
XM_019914185.1	NW_017852355.1	3542.7	-0.477554	0.00815104	transmembrane protein 245%2C transcript variant X1
XM_019899085.1	NW_017851633.1	7437.37	-0.477631	0.00968776	protein diaphanous
XM_019915749.1	NW_017852378.1	1102.65	-0.478637	0.00041182	probable cation-transporting ATPase 13A3
XM_019916773.1	NW_017850703.1	2782.54	-0.479326	0.0019778	dynamin-like
XM_019911563.1	NW_017852278.1	2641.5	-0.479332	0.00106524	RNA polymerase II elongation factor Ell
XM_019898631.1	NW_017851505.1	6571.54	-0.480109	8.41278e-07	serine/threonine-protein kinase 10-like
XM_019913402.1	NW_017852336.1	2372.75	-0.480241	0.00400989	protein CASC3
XM_019916692.1	NW_017845860.1	301.207	-0.48029	0.00307367	uncharacterized LOC109545848
XM_019898760.1	NW_017851538.1	27493.5	-0.480587	0.00475163	AN1-type zinc finger protein 6%2C transcript variant X1
XM_019904767.1	NW_017852055.1	6380.58	-0.482436	0.00671766	dihydropteridine reductase
XM_019913521.1	NW_017852339.1	2340.98	-0.482808	1.17995e-05	NEDD8 ultimate buster 1-like
XM_019910790.1	NW_017852245.1	9024.32	-0.483642	6.77097e-05	phosphatidylinositol-binding clathrin assembly protein LAP%2C transcript variant X1
XM_019903422.1	NW_017852028.1	1369.84	-0.483736	0.00324121	nudC domain-containing protein 3
XM_019911734.1	NW_017852291.1	2633.53	-0.48386	0.0019778	dynamin-like
XM_019912205.1	NW_017852302.1	6627.79	-0.483942	0.00203668	formin-binding protein 1-like%2C transcript variant X1
XM_019911281.1	NW_017852265.1	5796.93	-0.483989	2.81463e-08	WW domain-binding protein 2
XM_019915750.1	NW_017852378.1	333.524	-0.484431	0.000263016	uncharacterized LOC109545207
XM_019908476.1	NW_017852115.1	11635.9	-0.484599	0.000138455	metal transporter CNNM4
XM_019915316.1	NW_017852369.1	236.261	-0.48583	0.00205991	dendritic arbor reduction protein 1-like%2C transcript variant X1
XM_019901242.1	NW_017851850.1	11967.5	-0.486696	0.00126296	heat shock 70 kDa protein 4%2C transcript variant X1
XM_019910208.1	NW_017852178.1	2001.62	-0.486696	0.00098825	zinc finger protein 878-like
XM_019915203.1	NW_017852369.1	9169.52	-0.487109	0.00464225	uncharacterized LOC109544838%2C transcript variant X1
XM_019906285.1	NW_017852082.1	4621.93	-0.487508	0.00731371	adenylyl cyclase-associated protein 1-like
XM_019904670.1	NW_017852052.1	1388.19	-0.487704	0.00287013	protein son of sevenless
XM_019913675.1	NW_017852342.1	1641.6	-0.4883	0.00892512	phosphofurin acidic cluster sorting protein 1
XM_019904838.1	NW_017852056.1	4587.77	-0.4886	0.00768946	endophilin-A%2C transcript variant X1
XM_019914336.1	NW_017852358.1	4332.09	-0.488608	0.00384827	ceramide synthase 6
XM_019907922.1	NW_017852107.1	1497.18	-0.488829	0.000268848	zinc finger protein 335-like
XM_019908117.1	NW_017852110.1	2299.02	-0.489238	0.00865265	Krueppel-like factor 3%2C transcript variant X1
XM_019906403.1	NW_017852083.1	13561.7	-0.489722	0.0020811	myosin heavy chain%2C non-muscle%2C transcript variant X1
XM_019909077.1	NW_017852128.1	2752.64	-0.48974	0.000214177	TIMELESS-interacting protein
XM_019898787.1	NW_017851551.1	90.7952	-0.490066	0.00752825	myotubularin-related protein 13-like
XM_019900126.1	NW_017851737.1	10395.7	-0.491932	4.18519e-06	transmembrane protein 184B%2C transcript variant X1
XM_019901536.1	NW_017851923.1	4670.5	-0.492391	1.96546e-08	striatin-3
XM_019916672.1	NW_017850502.1	3806.11	-0.492649	2.27536e-07	serine/threonine-protein kinase 10-like
XR_002172401.1	NW_017852264.1	1641.24	-0.49381	0.00697055	uncharacterized LOC109542172
XM_019908597.1	NW_017852117.1	827.127	-0.49525	2.3453e-06	U4/U6.U5 small nuclear ribonucleoprotein 27 kDa protein-like%2C transcript variant X1
XM_019916701.1	NW_017845861.1	310.405	-0.496418	0.00114334	uncharacterized LOC109545859
XM_019908521.1	NW_017852115.1	625.282	-0.496586	0.00163149	ATP-binding cassette sub-family G member 5
XM_019911003.1	NW_017852255.1	4015.77	-0.49678	0.000983992	coiled-coil and C2 domain-containing protein 1-like
XM_019917959.1	NW_017851181.1	3617.74	-0.496825	0.000823068	jmjC domain-containing histone demethylation protein 1%2C transcript variant X1
XM_019900637.1	NW_017851783.1	93.7455	-0.497159	0.000522307	cilia- and flagella-associated protein 36
XM_019916673.1	NW_017850503.1	4816.8	-0.497648	9.85729e-08	serine/threonine-protein kinase 10-like
XR_002172664.1	NW_017852380.1	129.964	-0.497895	0.00640382	uncharacterized LOC109545387
XM_019898151.1	NW_017851313.1	3370.88	-0.49908	2.65603e-08	ikaros family zinc finger protein%2C transcript variant X1
XM_019901456.1	NW_017851898.1	7359.9	-0.499598	8.56801e-06	oxysterol-binding protein 1%2C transcript variant X1
XM_019904647.1	NW_017852049.1	5975.32	-0.499795	3.56283e-05	phosphoacetylglucosamine mutase
XM_019906166.1	NW_017852076.1	4106.58	-0.499936	4.67526e-07	protein SMG5
XM_019907522.1	NW_017852103.1	1220.96	-0.500921	0.00101835	zinc finger BED domain-containing protein 1-like%2C transcript variant X1
XM_019905589.1	NW_017852064.1	412.942	-0.502528	0.000182542	polycomb group protein Pc-like
XM_019898415.1	NW_017851411.1	1620.71	-0.503007	0.00939157	SCY1-like protein 2
XM_019908402.1	NW_017852115.1	3136.64	-0.503758	0.00254951	ARF GTPase-activating protein GIT2
XM_019903665.1	NW_017852030.1	2898.8	-0.504483	0.000925169	golgin subfamily A member 4%2C transcript variant X1
XR_002172350.1	NW_017852224.1	99.3698	-0.50512	0.00652026	uncharacterized LOC109541578
XM_019909889.1	NW_017852166.1	2101.29	-0.505172	5.71655e-05	vinexin-like
XM_019916153.1	NW_017852381.1	20938.7	-0.506164	0.00119288	protein transport protein Sec61 subunit alpha
XM_019917705.1	NW_017851173.1	2225.68	-0.50633	0.00934364	actin cytoskeleton-regulatory complex protein PAN1-like%2C transcript variant X1
XM_019907109.1	NW_017852096.1	966.958	-0.506367	0.00697055	dual specificity protein phosphatase 22-like%2C transcript variant X1
XM_019904814.1	NW_017852056.1	3301.31	-0.506822	0.00100718	HEAT repeat-containing protein 5B%2C transcript variant X1
XM_019907860.1	NW_017852107.1	596.891	-0.50702	0.0077439	inosine triphosphate pyrophosphatase
XM_019904181.1	NW_017852037.1	94572.6	-0.507227	0.00124445	heat shock protein 83
XM_019917301.1	NW_017851136.1	6267.59	-0.508022	5.63898e-06	EH domain-binding protein 1%2C transcript variant X1
XM_019909311.1	NW_017852162.1	20057.7	-0.508066	0.00174486	sortilin-related receptor-like
XM_019906327.1	NW_017852082.1	2669.89	-0.509929	0.00381834	uncharacterized LOC109538897%2C transcript variant X1
XM_019912530.1	NW_017852305.1	2123.68	-0.50994	0.000583134	activating signal cointegrator 1 complex subunit 1-like
XM_019904133.1	NW_017852037.1	2331.73	-0.511119	0.00101954	serine/threonine-protein phosphatase 2A regulatory subunit B'' subunit beta-like%2C transcript variant X1
XM_019912520.1	NW_017852305.1	95.0846	-0.511364	0.00670238	T-box transcription factor TBX10
XM_019913435.1	NW_017852337.1	9976.43	-0.511656	0.00131805	putative glutamate synthase [NADPH]%2C transcript variant X1
XM_019902432.1	NW_017852012.1	3483.6	-0.511916	0.00520945	WD repeat%2C SAM and U-box domain-containing protein 1-like%2C transcript variant X1
XM_019911499.1	NW_017852270.1	862.587	-0.51229	0.00176821	activating signal cointegrator 1
XM_019905005.1	NW_017852056.1	12831	-0.51385	0.00237402	translocon-associated protein subunit gamma
XM_019899779.1	NW_017851704.1	3951.18	-0.514438	1.11204e-07	PH and SEC7 domain-containing protein 1%2C transcript variant X1
XM_019902668.1	NW_017852012.1	1753.53	-0.514834	7.46643e-06	RNA polymerase II subunit A C-terminal domain phosphatase
XM_019897760.1	NW_017851239.1	6744.2	-0.51574	0.00200946	phosphatidylinositol 4-phosphate 5-kinase type-1 alpha%2C transcript variant X1
XM_019900850.1	NW_017851819.1	3600.38	-0.516597	0.000188751	liprin-beta-1%2C transcript variant X1
XM_019915413.1	NW_017852371.1	8533.79	-0.517001	0.00120254	microsomal glutathione S-transferase 1-like
XM_019917641.1	NW_017851170.1	453.628	-0.517335	0.00730952	GTP-binding protein Di-Ras2
XM_019907814.1	NW_017852106.1	4674.38	-0.519162	9.96431e-08	serine/threonine-protein kinase Warts%2C transcript variant X1
XM_019899194.1	NW_017851651.1	14648.2	-0.519332	2.70225e-05	plasma membrane calcium-transporting ATPase 1%2C transcript variant X1
XM_019902845.1	NW_017852016.1	4999.55	-0.519494	0.000396717	tyrosine-protein phosphatase non-receptor type 9
XM_019903205.1	NW_017852021.1	11214.6	-0.51965	3.48015e-05	fatty aldehyde dehydrogenase-like%2C transcript variant X1
XM_019900605.1	NW_017851783.1	749.203	-0.51982	0.00191487	uncharacterized LOC109534826
XM_019912461.1	NW_017852305.1	8269.5	-0.52163	0.00162279	microtubule-associated protein 1B-like
XM_019904308.1	NW_017852037.1	102.551	-0.522331	0.00902363	T-box transcription factor TBX20-like
XM_019901316.1	NW_017851859.1	1454.43	-0.522661	0.000814715	queuine tRNA-ribosyltransferase accessory subunit 2%2C transcript variant X1
XM_019909494.1	NW_017852166.1	4056.55	-0.523221	0.000289841	tetratricopeptide repeat protein 39B-like%2C transcript variant X1
XM_019916279.1	NW_017852381.1	1201.35	-0.524241	2.02998e-05	lateral signaling target protein 2 homolog
XM_019900030.1	NW_017851724.1	380.47	-0.524243	0.00363384	uncharacterized LOC109534372
XM_019897880.1	NW_017851268.1	1990.24	-0.524539	6.51809e-06	ras-related protein Rab-39B-like
XM_019903054.1	NW_017852017.1	22692.1	-0.525165	0.00513362	6-phosphofructo-2-kinase/fructose-2%2C6-bisphosphatase-like
XM_019900202.1	NW_017851737.1	1702.02	-0.525653	4.59314e-06	NF-X1-type zinc finger protein NFXL1
XM_019914944.1	NW_017852366.1	10188.8	-0.526514	0.000217531	glutaredoxin-C4-like%2C transcript variant X1
XM_019898786.1	NW_017851551.1	372.645	-0.526519	5.91849e-05	myotubularin-related protein 13-like
XM_019909578.1	NW_017852166.1	3849.56	-0.527056	1.36748e-05	GTP-binding protein 2%2C transcript variant X1
XM_019904354.1	NW_017845362.1	88.6909	-0.528344	0.00411498	uncharacterized LOC109537537
XM_019902293.1	NW_017852003.1	367.331	-0.52851	0.00577754	protein lines%2C transcript variant X1
XM_019909034.1	NW_017852128.1	1713.83	-0.529366	0.0042113	stromal membrane-associated protein 1-like
XM_019904398.1	NW_017852038.1	3594.59	-0.529622	0.00371384	uncharacterized LOC109537597%2C transcript variant X1
XM_019899791.1	NW_017851704.1	4699.99	-0.529916	0.00494368	uncharacterized LOC109534210
XM_019911369.1	NW_017852267.1	1947.99	-0.529918	0.00167851	ubiquitin-conjugating enzyme E2 J1-like
XM_019897848.1	NW_017851256.1	10612.6	-0.532527	0.00761037	microtubule-associated serine/threonine-protein kinase 3%2C transcript variant X1
XM_019915540.1	NW_017852374.1	8046.64	-0.533042	6.00088e-10	chromodomain-helicase-DNA-binding protein Mi-2 homolog%2C transcript variant X1
XM_019902229.1	NW_017852003.1	3123.93	-0.533786	0.00187064	transcription initiation factor TFIID subunit 1%2C transcript variant X1
XM_019909329.1	NW_017852162.1	1338.47	-0.537107	0.000217531	uncharacterized LOC109540838
XM_019912448.1	NW_017852305.1	4411.28	-0.537402	4.19611e-07	integral membrane protein GPR155
XM_019900820.1	NW_017851816.1	146.263	-0.537586	0.000680569	uncharacterized LOC109535008
XM_019902616.1	NW_017852012.1	1071.4	-0.53842	0.00372772	trichohyalin
XM_019912230.1	NW_017852302.1	1231.33	-0.538564	0.000296089	protein spindle-F%2C transcript variant X1
XM_019911950.1	NW_017852300.1	155.781	-0.542353	0.00280459	potassium/sodium hyperpolarization-activated cyclic nucleotide-gated channel 1-like%2C transcript variant X1
XM_019913188.1	NW_017852328.1	4397.18	-0.542489	0.000110438	tolloid-like protein 1
XM_019902895.1	NW_017852017.1	6745.18	-0.5431	2.33601e-08	autophagy-related protein 101%2C transcript variant X1
XM_019907095.1	NW_017852096.1	3078.57	-0.543189	0.0015017	arf-GAP with Rho-GAP domain%2C ANK repeat and PH domain-containing protein 1%2C transcript variant X1
XM_019917285.1	NW_017851136.1	8598.48	-0.543632	0.00234161	uncharacterized LOC109546363%2C transcript variant X1
XM_019898928.1	NW_017851601.1	2173.26	-0.543645	0.00130219	tumor necrosis factor receptor superfamily member wengen-like%2C transcript variant X1
XM_019917472.1	NW_017851157.1	40747.8	-0.545136	0.000556844	uncharacterized LOC109546494
XM_019904139.1	NW_017852037.1	1232.6	-0.546982	2.24333e-07	histone acetyltransferase KAT2B
XR_002171477.1	NW_017846491.1	177.039	-0.547069	0.00199917	uncharacterized LOC109533025%2C transcript variant X1
XM_019908802.1	NW_017852126.1	44181.8	-0.547445	0.000500482	microtubule-actin cross-linking factor 1%2C transcript variant X1
XM_019910798.1	NW_017852245.1	4138.64	-0.547456	0.000567492	transcriptional repressor CTCF-like%2C transcript variant X1
XM_019911727.1	NW_017852290.1	3147.57	-0.547837	0.00127286	probable enoyl-CoA hydratase echA8%2C transcript variant X1
XM_019901916.1	NW_017851949.1	2775.2	-0.548823	0.00259316	uncharacterized LOC109535893%2C transcript variant X1
XR_002171987.1	NW_017852056.1	1153.67	-0.549014	0.000468033	uncharacterized LOC109537964%2C transcript variant X1
XM_019908414.1	NW_017852115.1	329.715	-0.54909	0.00787422	ATP-binding cassette sub-family G member 8
XM_019904933.1	NW_017852056.1	975.671	-0.55305	0.00139165	BTB/POZ domain-containing protein 7%2C transcript variant X1
XM_019910875.1	NW_017849423.1	1742.98	-0.553589	0.000310552	E3 ubiquitin-protein ligase UBR1-like
XM_019910375.1	NW_017852201.1	13496.8	-0.553624	0.00398026	monocarboxylate transporter 3-like
XM_019909350.1	NW_017852166.1	8600.81	-0.553907	0.000830196	kinesin-like protein KIF13A
XM_019917129.1	NW_017851087.1	1717.6	-0.554132	0.00378188	disintegrin and metalloproteinase domain-containing protein 10-like
XM_019903569.1	NW_017852030.1	4685.58	-0.554797	7.09857e-05	myelin regulatory factor-like protein%2C transcript variant X1
XM_019910584.1	NW_017849390.1	10561.9	-0.554984	1.29933e-10	transmembrane protein 53%2C transcript variant X1
XM_019900075.1	NW_017851724.1	434.1	-0.555082	0.00224743	cathepsin B-like%2C transcript variant X1
XM_019908855.1	NW_017852126.1	3690.22	-0.555112	2.35572e-08	CCAAT/enhancer-binding protein gamma
XM_019912238.1	NW_017852302.1	5955.42	-0.556086	0.00396609	uncharacterized LOC109542828
XM_019917221.1	NW_017851106.1	4208.46	-0.556347	8.59533e-07	uncharacterized LOC109546301
XM_019912018.1	NW_017852300.1	2032.9	-0.55678	0.00968776	riboflavin kinase%2C transcript variant X1
XM_019903464.1	NW_017848006.1	93.232	-0.556797	0.00147379	uncharacterized G-patch domain protein DDB_G0278987-like
XM_019905708.1	NW_017852070.1	3895.42	-0.556891	0.00519725	charged multivesicular body protein 2a
XM_019900587.1	NW_017851776.1	574.989	-0.557702	0.00718452	uncharacterized LOC109534805%2C transcript variant X1
XM_019897953.1	NW_017851282.1	8584.43	-0.558132	0.000313543	rho GTPase-activating protein 28-like%2C transcript variant X1
XM_019900159.1	NW_017851737.1	6312.7	-0.558596	0.00592311	heparan-alpha-glucosaminide N-acetyltransferase-like
XM_019902215.1	NW_017852003.1	4143.39	-0.55916	5.66204e-07	suppressor of cytokine signaling 5%2C transcript variant X1
XM_019904930.1	NW_017852056.1	3391.78	-0.560593	4.3547e-06	dual specificity tyrosine-phosphorylation-regulated kinase 2%2C transcript variant X1
XM_019905427.1	NW_017852064.1	3005.49	-0.561648	0.000166146	class A basic helix-loop-helix protein 15-like%2C transcript variant X1
XM_019911358.1	NW_017852267.1	9071.56	-0.564119	4.33662e-05	supervillin-like%2C transcript variant X1
XM_019906753.1	NW_017852087.1	84.7145	-0.564742	0.00219332	fork head domain-containing protein crocodile
XM_019901492.1	NW_017851912.1	3723.42	-0.565272	0.00777543	uncharacterized LOC109535575%2C transcript variant X1
XM_019901812.1	NW_017851939.1	3480.73	-0.566134	0.00116488	uncharacterized LOC109535807
XR_002172564.1	NW_017852362.1	362.045	-0.566589	0.00012888	uncharacterized LOC109544346
XM_019913472.1	NW_017852337.1	5074.64	-0.566937	0.000183272	ATP-binding cassette sub-family B member 7%2C mitochondrial
XM_019902208.1	NW_017852003.1	5320.54	-0.567358	0.00102504	protein dopey-1 homolog%2C transcript variant X1
XM_019906254.1	NW_017852082.1	3744.05	-0.567806	0.00250285	transmembrane protein 208
XM_019910941.1	NW_017852254.1	86.863	-0.56803	0.0037689	protein FAM234B-like
XR_002171879.1	NW_017852028.1	3757.38	-0.568571	0.00149126	uncharacterized LOC109536905
XM_019915244.1	NW_017852369.1	3672.38	-0.568776	0.00597649	band 7 protein AGAP004871-like%2C transcript variant X1
XM_019911897.1	NW_017852299.1	4319.75	-0.569056	0.000393767	fasciculation and elongation protein zeta-2-like
XM_019905217.1	NW_017848565.1	3261.75	-0.569155	0.000218757	fasciculation and elongation protein zeta-2-like
XM_019901568.1	NW_017851926.1	4127.97	-0.569541	0.00310319	anoctamin-1-like%2C transcript variant X1
XM_019916778.1	NW_017850708.1	870.943	-0.569912	0.00431816	ATP-binding cassette sub-family G member 4-like
XM_019903984.1	NW_017852037.1	3153.02	-0.570164	7.76847e-07	GTPase-activating protein%2C transcript variant X1
XM_019900306.1	NW_017851751.1	2082.3	-0.570592	6.65165e-13	U11/U12 small nuclear ribonucleoprotein 48 kDa protein-like
XM_019904141.1	NW_017852037.1	8538.01	-0.570865	0.000707766	uncharacterized LOC109537418%2C transcript variant X1
XM_019917534.1	NW_017851160.1	170.468	-0.571214	0.00645964	uncharacterized LOC109546544
XM_019914659.1	NW_017852366.1	7071.85	-0.571608	1.11157e-07	autism susceptibility gene 2 protein-like%2C transcript variant X1
XM_019899321.1	NW_017851651.1	2334.64	-0.572534	0.0013777	uncharacterized LOC109533839
XM_019909712.1	NW_017852166.1	5356.22	-0.573118	0.000239753	alpha-soluble NSF attachment protein%2C transcript variant X1
XM_019913514.1	NW_017852339.1	2603.92	-0.573534	4.22192e-06	AF4/FMR2 family member 4
XM_019902369.1	NW_017852012.1	5758.72	-0.573591	0.00116488	protein phosphatase 1A-like%2C transcript variant X1
XM_019918051.1	NW_017851187.1	19228.3	-0.573969	5.73932e-07	receptor expression-enhancing protein 5-like%2C transcript variant X1
XM_019915595.1	NW_017852376.1	7168.45	-0.5744	0.00039692	23 kDa integral membrane protein-like%2C transcript variant X1
XM_019898703.1	NW_017851520.1	970.661	-0.575064	0.00685511	B-cell lymphoma/leukemia 11A
XM_019906406.1	NW_017852083.1	2646.13	-0.577448	0.00149336	mediator of RNA polymerase II transcription subunit 13%2C transcript variant X1
XM_019898096.1	NW_017851282.1	475.907	-0.577915	0.0002231	RNA pseudouridylate synthase domain-containing protein 1-like
XM_019917515.1	NW_017851160.1	12859.9	-0.578281	0.000163455	BAG domain-containing protein Samui%2C transcript variant X1
XM_019907992.1	NW_017852108.1	2677.38	-0.579228	0.00130275	peptidoglycan-recognition protein SC2-like%2C transcript variant X1
XM_019901968.1	NW_017851952.1	90.5473	-0.579476	0.00712614	uncharacterized LOC109535928
XM_019902798.1	NW_017852014.1	3033.96	-0.581349	0.00107568	phosphoinositide 3-kinase adapter protein 1%2C transcript variant X1
XM_019900002.1	NW_017846981.1	791.418	-0.581598	0.00655443	B-cell lymphoma/leukemia 11A-like
XM_019899394.1	NW_017851651.1	1583.16	-0.581952	0.00203839	uncharacterized LOC109533886
XM_019912369.1	NW_017852304.1	5641.35	-0.582008	1.82765e-06	apoptosis-resistant E3 ubiquitin protein ligase 1%2C transcript variant X1
XM_019918124.1	NW_017851196.1	5003.74	-0.582313	1.77008e-06	beta-TrCP%2C transcript variant X1
XM_019907014.1	NW_017848912.1	791.623	-0.582358	0.00648453	B-cell lymphoma/leukemia 11A-like
XM_019910769.1	NW_017852245.1	184.446	-0.582453	0.00481186	Krueppel-like factor luna
XM_019918196.1	NW_017846291.1	9744.71	-0.583356	0.00167437	baculoviral IAP repeat-containing protein 2-like
XM_019898241.1	NW_017851370.1	764.833	-0.583687	0.00269785	uncharacterized LOC109533051
XM_019914552.1	NW_017852366.1	2775.13	-0.584774	0.000877743	matrix metalloproteinase-2-like
XM_019914030.1	NW_017852350.1	5021.83	-0.588974	0.000208049	putative inorganic phosphate cotransporter%2C transcript variant X1
XM_019913341.1	NW_017852336.1	8269.8	-0.589394	0.00312271	uncharacterized LOC109543563%2C transcript variant X1
XM_019901678.1	NW_017851937.1	1854.73	-0.589402	0.00448785	pre-mRNA-splicing factor CWC25 homolog
XM_019902489.1	NW_017847776.1	5126.98	-0.590212	0.00640382	ATP-binding cassette sub-family G member 1-like
XM_019900821.1	NW_017851816.1	26386.9	-0.590383	0.00957599	transferrin-like%2C transcript variant X1
XM_019910353.1	NW_017852201.1	2378.02	-0.591787	0.0085149	proto-oncogene tyrosine-protein kinase ROS
XM_019907066.1	NW_017852096.1	1225.46	-0.592154	0.000688137	coiled-coil domain-containing protein 102A%2C transcript variant X1
XM_019904387.1	NW_017852038.1	4330.44	-0.592285	1.07566e-05	protein tramtrack%2C alpha isoform-like%2C transcript variant X1
XM_019914160.1	NW_017852352.1	720.159	-0.592453	0.00107568	protein lap4-like
XM_019911217.1	NW_017852263.1	2632.39	-0.592724	0.00136334	uncharacterized LOC109542141
XM_019916528.1	NW_017852382.1	2921.69	-0.595754	1.37982e-06	CREB-regulated transcription coactivator 1-like%2C transcript variant X1
[truncated: 742 more rows]

## Sheet: Strong VS Non-Flier
Accession	Scaffold	baseMean	log2Fold Change	B-H adjusted p-value	Gene Annotation
XM_019901106.1	NW_017851824.1	9930.07	4.10929	1.81e-23	phosphoglycolate phosphatase 2-like
XM_019903775.1	NW_017852032.1	677.117	2.65293	1.43e-12	protein giant-lens
XM_019917936.1	NW_017851181.1	9395.65	2.58245	1.54e-10	inositol oxygenase
XM_019906987.1	NW_017852094.1	7748.55	2.47904	8.74e-09	lysosome membrane protein 2-like%2C transcript variant X1
XM_019898558.1	NW_017851465.1	38081.7	2.40854	2.58e-15	cytochrome P450 6A1-like
XM_019905415.1	NW_017852064.1	502.148	2.36562	4.11e-08	uncharacterized LOC109538260
XM_019903350.1	NW_017852028.1	353.206	2.33673	2e-08	putative inorganic phosphate cotransporter
XM_019901549.1	NW_017851923.1	287.714	2.33668	5.64e-09	tryptophan 2%2C3-dioxygenase-like
XM_019915994.1	NW_017852380.1	19080.5	2.31975	1.69e-11	probable low-specificity L-threonine aldolase 2%2C transcript variant X1
XM_019899878.1	NW_017851723.1	4292.82	2.28583	8.1e-09	tryptophan 2%2C3-dioxygenase-like
XM_019901548.1	NW_017851923.1	5255.03	2.2742	8.1e-09	tryptophan 2%2C3-dioxygenase-like
XM_019901359.1	NW_017851866.1	4524.79	2.27322	8.95e-09	tryptophan 2%2C3-dioxygenase-like
XM_019917028.1	NW_017851084.1	13110.2	2.21347	1.22e-11	branched-chain-amino-acid aminotransferase%2C cytosolic
XM_019905419.1	NW_017852064.1	22013.6	2.20164	4.08e-07	serine hydroxymethyltransferase%2C cytosolic%2C transcript variant X1
XR_002172018.1	NW_017852064.1	831.316	2.19217	4.11e-08	protein KIAA0556-like%2C transcript variant X1
XM_019912174.1	NW_017852302.1	2032.22	2.18261	4.26e-08	kynurenine formamidase-like
XM_019915053.1	NW_017852368.1	11271.8	2.16621	1.81e-08	group XV phospholipase A2-like
XM_019902102.1	NW_017851993.1	18447.5	2.16299	5.99e-07	D-3-phosphoglycerate dehydrogenase
XM_019899299.1	NW_017851651.1	6426.46	2.14281	2.27e-06	pancreatic triacylglycerol lipase-like
XM_019903414.1	NW_017852028.1	6913.09	2.13724	2.91e-06	cytoglobin-1-like
XM_019917584.1	NW_017851165.1	1398.19	2.13713	3.34e-06	regucalcin-like%2C transcript variant X1
XM_019906322.1	NW_017852082.1	3172.52	2.10769	6.05e-08	uncharacterized LOC109538892%2C transcript variant X1
XM_019916990.1	NW_017851084.1	41896.3	2.04372	3.11e-07	amidophosphoribosyltransferase-like
XM_019915946.1	NW_017852380.1	11975.1	2.03473	9.76e-11	adenylosuccinate lyase
XM_019918004.1	NW_017851181.1	187.722	1.98286	2.3e-05	putative fatty acyl-CoA reductase CG5065%2C transcript variant X1
XM_019903737.1	NW_017852030.1	8746.32	1.9825	7.32e-07	neural/ectodermal development factor IMP-L2%2C transcript variant X1
XM_019910396.1	NW_017852201.1	1141.67	1.95823	1.74e-05	argininosuccinate synthase
XM_019900136.1	NW_017851737.1	3981.19	1.90637	4.26e-05	lysozyme C-1-like
XM_019915944.1	NW_017852380.1	2099.54	1.90253	4.61e-06	uncharacterized LOC109545322%2C transcript variant X1
XM_019903768.1	NW_017852032.1	17328.6	1.86284	9.29e-10	calcium/calmodulin-dependent protein kinase type 1-like
XM_019910044.1	NW_017852171.1	271.872	1.85624	2.3e-05	cytochrome P450 6k1-like
XM_019913763.1	NW_017852342.1	243.787	1.83174	5.01e-05	proton-coupled folate transporter-like
XM_019915939.1	NW_017852380.1	1430.32	1.82831	1.43e-05	uncharacterized LOC109545321%2C transcript variant X1
XM_019912509.1	NW_017852305.1	11078.1	1.82768	6.07e-05	scavenger receptor class B member 1-like%2C transcript variant X1
XM_019903413.1	NW_017852028.1	347.394	1.82233	2.83e-05	uncharacterized LOC109536931
XM_019915286.1	NW_017852369.1	3182.3	1.78512	1.94e-10	sphingomyelin phosphodiesterase-like%2C transcript variant X1
XM_019916923.1	NW_017850979.1	56094.1	1.78127	2.02e-05	pectinesterase B-like
XM_019917057.1	NW_017851084.1	873.51	1.77951	6.25e-05	cytochrome P450 4c3-like%2C transcript variant X1
XM_019901126.1	NW_017851824.1	716.261	1.77641	2.71e-06	cytochrome P450 4g1-like
XM_019902087.1	NW_017851990.1	65308.7	1.7752	2.03e-05	pectinesterase B-like
XM_019913946.1	NW_017852349.1	8408.06	1.77281	4.11e-08	probable methylmalonate-semialdehyde dehydrogenase [acylating]%2C mitochondrial%2C transcript variant X1
LOC109534968	NW_017847245.1	61.6209	1.76311	3.04e-06	none
XM_019905803.1	NW_017852073.1	1392.45	1.76041	0.000176714	cytochrome b5-like
XR_002171904.1	NW_017852033.1	54.1803	1.75836	0.000134382	uncharacterized LOC109537196
XM_019904416.1	NW_017852038.1	126.831	1.75177	8.45e-05	facilitated trehalose transporter Tret1-like
XM_019898846.1	NW_017851569.1	40305.1	1.75044	2.41e-05	pectinesterase B-like
XM_019906503.1	NW_017852083.1	2156.53	1.74917	2.38e-05	uncharacterized LOC109539000
XM_019906467.1	NW_017852083.1	17582.2	1.74802	5.71e-07	bifunctional methylenetetrahydrofolate dehydrogenase/cyclohydrolase%2C mitochondrial%2C transcript variant X1
XM_019911839.1	NW_017852296.1	90.1891	1.74347	0.000213874	circadian clock-controlled protein-like
XM_019913608.1	NW_017852340.1	7944.24	1.7361	0.000153204	D-arabinitol dehydrogenase 1-like
XM_019914500.1	NW_017852363.1	9305.57	1.73593	3.14e-05	glucose 1%2C6-bisphosphate synthase%2C transcript variant X1
XM_019898560.1	NW_017851465.1	7664.49	1.73	4.03e-06	cytochrome P450 6a2-like
XM_019909033.1	NW_017852128.1	12910.2	1.71062	5.28e-05	myrosinase 1-like
XM_019914207.1	NW_017852355.1	19610	1.70887	1.13e-05	probable cytochrome P450 6a13
XM_019897788.1	NW_017851239.1	3800.49	1.70552	0.00019497	senecionine N-oxygenase-like%2C transcript variant X1
XM_019900305.1	NW_017851751.1	27654.9	1.70525	0.000294619	sorbitol dehydrogenase-like
XM_019917820.1	NW_017851174.1	477.859	1.70117	7.3e-05	pseudouridine-5'-phosphatase-like%2C transcript variant X1
LOC109546327	NW_017851123.1	2.59127	1.69997	0.000267629	none
XM_019900378.1	NW_017847130.1	72.3763	1.6962	2.89e-06	farnesol dehydrogenase-like
XM_019906856.1	NW_017852091.1	1085.57	1.69277	5.63e-06	beta-galactosidase-1-like protein 3
LOC109540158	NW_017849041.1	430.903	1.67439	9.65e-08	none
XM_019904215.1	NW_017852037.1	160.402	1.66939	1.51e-05	calcitonin receptor-like%2C transcript variant X1
XM_019908912.1	NW_017852126.1	296.785	1.66858	0.00013325	uncharacterized LOC109540501
XM_019916049.1	NW_017852380.1	511.607	1.66649	6.46e-07	enhancer of split mbeta protein-like
XM_019917426.1	NW_017851153.1	11126	1.66555	1.32e-07	uncharacterized LOC109546460
XM_019908357.1	NW_017849040.1	808.731	1.65706	1.23e-07	aldose reductase-like
XM_019898113.1	NW_017851283.1	3602.2	1.65382	5.33e-05	alanine--glyoxylate aminotransferase 2-like
XM_019917224.1	NW_017851114.1	721.703	1.63576	0.000521538	uncharacterized LOC109546305
XM_019900345.1	NW_017851758.1	23848.5	1.63467	2.39e-05	myrosinase 1-like
XM_019905761.1	NW_017852072.1	4767.38	1.63193	6.91e-05	alanine--glyoxylate aminotransferase 2-like
XM_019915536.1	NW_017852373.1	230.067	1.6284	0.000290805	cytochrome P450 6k1-like%2C transcript variant X1
XM_019905252.1	NW_017852059.1	337.993	1.62194	0.000386288	rhamnogalacturonate lyase-like
XM_019897898.1	NW_017851276.1	320.327	1.61942	1.98e-05	probable beta-hexosaminidase fdl
XM_019901766.1	NW_017851937.1	190.478	1.61618	7.33e-05	toll-like receptor 3
XM_019898842.1	NW_017851565.1	166.091	1.61563	0.000398366	uncharacterized LOC109533505%2C transcript variant X1
XM_019899575.1	NW_017851683.1	397.684	1.60938	5.43e-05	farnesol dehydrogenase-like
XM_019910316.1	NW_017852192.1	1161.42	1.6038	0.000410594	putative protein TPRXL%2C transcript variant X1
XM_019898400.1	NW_017851403.1	22.4301	1.60033	5.49e-05	F-box/LRR-repeat protein 7-like
XM_019906197.1	NW_017852080.1	34.1978	1.58287	0.000266539	homeobox protein OTX2-like
XM_019900102.1	NW_017851731.1	220.788	1.57579	0.000958443	protein cycle
XM_019917150.1	NW_017851087.1	14880.2	1.55459	3.18e-09	putative inorganic phosphate cotransporter
XM_019901196.1	NW_017851837.1	27.8551	1.54847	4.51e-05	lipase 3-like
XM_019898650.1	NW_017851509.1	7236.01	1.54304	5.95e-07	uncharacterized LOC109533356
XM_019901830.1	NW_017851943.1	7.73256	1.5402	0.00105488	uncharacterized LOC109535823
XM_019914375.1	NW_017852358.1	555.264	1.53875	0.000669033	glucose dehydrogenase [FAD%2C quinone]-like
XM_019912359.1	NW_017852302.1	94.0639	1.52765	0.00010304	protein artichoke-like
XM_019914230.1	NW_017852355.1	299.102	1.51929	5.45e-05	uncharacterized LOC109544171%2C transcript variant X1
XM_019912511.1	NW_017852305.1	1562.77	1.51824	4.19e-07	scavenger receptor class B member 1-like%2C transcript variant X1
XM_019912433.1	NW_017852305.1	311.409	1.50652	0.000575041	glucose dehydrogenase [FAD%2C quinone]-like
XM_019903444.1	NW_017852028.1	106.176	1.50581	0.000103283	trissin receptor-like%2C transcript variant X1
XM_019903326.1	NW_017852026.1	10.3452	1.50078	0.00150515	uncharacterized LOC109536879
XM_019917237.1	NW_017851121.1	190.342	1.49914	0.00174175	uncharacterized LOC109546318
XM_019910093.1	NW_017852173.1	1202.28	1.49768	0.000286498	brachyurin-like%2C transcript variant X1
XM_019914180.1	NW_017850005.1	156.825	1.49562	0.000320389	uncharacterized LOC109544136
XM_019905461.1	NW_017852064.1	19096.8	1.49291	0.000174986	trifunctional purine biosynthetic protein adenosine-3
XM_019916746.1	NW_017850652.1	7526.01	1.48924	3.02e-06	aldose reductase-like
XM_019915909.1	NW_017852380.1	6535.6	1.48623	2.14e-05	endoglucanase-like
XR_002172757.1	NW_017851105.1	8406.74	1.47994	3.46e-06	aldose reductase-like
XR_002171509.1	NW_017851481.1	8404.86	1.47933	3.49e-06	aldose reductase-like
XM_019905321.1	NW_017852061.1	4177.13	1.47488	0.000675604	sodium-independent sulfate anion transporter-like%2C transcript variant X1
XM_019908047.1	NW_017852109.1	1046.75	1.46939	0.000277589	uncharacterized LOC109539962
XM_019906385.1	NW_017852083.1	104.759	1.46644	0.00152475	SUN domain-containing protein 3-like
XM_019903235.1	NW_017852025.1	9047.16	1.4626	0.00105084	neutral alpha-glucosidase C-like
XM_019901366.1	NW_017851869.1	261.145	1.45963	0.00213928	equilibrative nucleoside transporter 3-like
XM_019905006.1	NW_017852056.1	28073.7	1.45732	2.74e-05	uncharacterized LOC109537989
XM_019901159.1	NW_017851827.1	178.666	1.44783	3.52e-09	probable cytochrome P450 4aa1
XM_019908289.1	NW_017852110.1	383.119	1.44597	1.16e-07	purine nucleoside phosphorylase-like
XM_019916067.1	NW_017852381.1	15.0692	1.43545	0.00132902	probable E3 ubiquitin-protein ligase makorin-1
XM_019913020.1	NW_017852324.1	10365.2	1.43502	2.37e-10	uncharacterized LOC109543346
XM_019907763.1	NW_017852105.1	201.718	1.43231	0.00132485	peroxisomal acyl-coenzyme A oxidase 3-like
XM_019901991.1	NW_017851963.1	15208.4	1.43065	2.17e-14	cytosolic purine 5'-nucleotidase
XM_019916284.1	NW_017852381.1	12301.4	1.42953	0.00172117	glycine dehydrogenase (decarboxylating)%2C mitochondrial
XM_019912771.1	NW_017852312.1	3563.03	1.424	2.43e-05	putative serine protease F56F10.1
XM_019907079.1	NW_017852096.1	1142.78	1.42119	3.61e-05	N-acetylgalactosamine kinase
XM_019907129.1	NW_017852098.1	6176.2	1.4168	0.00156763	serine hydrolase-like protein
XR_002172686.1	NW_017850453.1	229.586	1.41629	0.000778933	uncharacterized LOC109545724
XM_019900404.1	NW_017851760.1	2289.91	1.41421	5.41e-05	venom carboxylesterase-6-like
XM_019900235.1	NW_017851737.1	166.672	1.41245	0.00334776	glutathione S-transferase 1-like
LOC109534556	NW_017851741.1	5.93994	1.41081	0.00226917	none
XM_019902076.1	NW_017851984.1	1227.04	1.39507	2.8e-06	membrane metallo-endopeptidase-like 1
XM_019908546.1	NW_017849094.1	3311.21	1.39427	8.75e-13	cytosolic purine 5'-nucleotidase-like
XM_019906883.1	NW_017852091.1	15441.2	1.39089	8.75e-05	protein henna%2C transcript variant X1
XM_019916994.1	NW_017851084.1	31844.3	1.38946	0.0010417	multifunctional protein ADE2
LOC109545513	NW_017850402.1	120.414	1.38731	0.00108318	none
XM_019902086.1	NW_017851990.1	153048	1.38585	0.000396134	pectinesterase B-like
XM_019916533.1	NW_017852382.1	167.638	1.38544	0.000198748	dynein regulatory complex subunit 7
XR_002172237.1	NW_017852143.1	281.919	1.38461	0.00139585	uncharacterized LOC109540729
XM_019904829.1	NW_017852056.1	2276.77	1.38378	4.78e-05	lipoamide acyltransferase component of branched-chain alpha-keto acid dehydrogenase complex%2C mitochondrial%2C transcript variant X1
XM_019911869.1	NW_017852297.1	88903.5	1.38236	0.000483163	C-1-tetrahydrofolate synthase%2C cytoplasmic
XM_019900101.1	NW_017851731.1	4448.64	1.37827	0.000591654	beta-galactosidase-1-like protein 3
XM_019916797.1	NW_017850729.1	387.493	1.37275	0.00107679	probable cytochrome P450 6a13
XM_019898329.1	NW_017851386.1	483.453	1.37236	0.00104953	probable cytochrome P450 6a13
XM_019898847.1	NW_017851569.1	111328	1.36365	0.000556286	pectinesterase B-like
XM_019908637.1	NW_017852117.1	5.15202	1.36292	0.00436204	leucine-rich repeat-containing protein 51-like%2C transcript variant X1
XM_019898565.1	NW_017851470.1	1152.68	1.36157	4.14e-08	mitochondrial ornithine transporter 1%2C transcript variant X1
XM_019898804.1	NW_017846646.1	1297.61	1.36006	0.00117643	juvenile hormone esterase-like
XM_019903746.1	NW_017852030.1	790.901	1.35883	0.00167188	retinoid-inducible serine carboxypeptidase-like
XM_019902233.1	NW_017852003.1	74393.8	1.35617	0.000847276	endoglucanase-like
XM_019901128.1	NW_017851824.1	21.5814	1.35602	0.00200183	uncharacterized LOC109535243
XM_019904307.1	NW_017852037.1	1502.38	1.35519	0.00143378	D-2-hydroxyglutarate dehydrogenase%2C mitochondrial
XM_019917336.1	NW_017851136.1	958.667	1.35366	0.00023873	sialin%2C transcript variant X1
XM_019917134.1	NW_017851087.1	51024	1.35272	0.00324718	probable phosphoserine aminotransferase
XR_002171531.1	NW_017851565.1	34.4846	1.34847	0.0045988	uncharacterized LOC109533508
XM_019913196.1	NW_017852329.1	1896.95	1.34781	3.5e-05	endothelin-converting enzyme 1-like
XM_019907834.1	NW_017852107.1	133.545	1.33905	0.00552055	cuticle protein 7-like
XM_019907983.1	NW_017849001.1	1037.8	1.33514	0.00152489	probable cytochrome P450 6a13
XM_019900590.1	NW_017851776.1	1138.57	1.33284	0.000615078	trans-1%2C2-dihydrobenzene-1%2C2-diol dehydrogenase-like
XM_019901792.1	NW_017851937.1	7004.31	1.33202	8.81e-05	protein vestigial%2C transcript variant X1
XM_019899020.1	NW_017851618.1	4541.27	1.32809	0.000344162	glutathione S-transferase-like%2C transcript variant X1
XM_019914990.1	NW_017850189.1	1138.71	1.32713	0.00065858	trans-1%2C2-dihydrobenzene-1%2C2-diol dehydrogenase-like
XM_019916337.1	NW_017852381.1	2226.35	1.3233	0.000873034	facilitated trehalose transporter Tret1-like
XM_019901785.1	NW_017851937.1	4877.33	1.32312	0.000266013	myrosinase 1-like
XM_019915760.1	NW_017852380.1	76.8032	1.32063	5.45e-06	dynein heavy chain 3%2C axonemal
XM_019907833.1	NW_017852107.1	2326.28	1.3194	0.00041653	myosin-VIIa-like
XR_002171926.1	NW_017852037.1	7.33467	1.31741	0.00342809	uncharacterized LOC109537480
XM_019898905.1	NW_017851594.1	1580.7	1.31727	0.000721053	trans-1%2C2-dihydrobenzene-1%2C2-diol dehydrogenase-like
XM_019900696.1	NW_017851783.1	2478.41	1.31637	0.00128635	juvenile hormone esterase-like%2C transcript variant X1
XM_019911854.1	NW_017849557.1	77.3595	1.31411	0.00647934	equilibrative nucleoside transporter 3-like
XM_019911875.1	NW_017849558.1	77.3595	1.31411	0.00647934	equilibrative nucleoside transporter 3-like
XM_019903342.1	NW_017852028.1	759.617	1.31379	3.8e-06	2-hydroxyacyl-CoA lyase 1
XM_019917544.1	NW_017851160.1	20.1927	1.31122	0.0058803	uncharacterized LOC109546552
XM_019912585.1	NW_017852308.1	15.9677	1.30928	0.00436615	trypsin-2-like%2C transcript variant X1
XM_019917238.1	NW_017851122.1	4.37479	1.30626	0.00499852	odorant receptor Or2-like
XM_019916363.1	NW_017852381.1	6267.73	1.30224	1.92e-09	elongation of very long chain fatty acids protein 1-like
XM_019900346.1	NW_017851758.1	2807.17	1.29566	0.00231906	myrosinase 1-like
XR_002172831.1	NW_017851201.1	7.29782	1.29539	0.00460698	uncharacterized LOC109546961
XM_019915209.1	NW_017852369.1	12.2761	1.29455	0.0032566	uncharacterized LOC109544840
XM_019916229.1	NW_017852381.1	3246.52	1.29426	0.000975854	facilitated trehalose transporter Tret1
XM_019908711.1	NW_017852117.1	4226.26	1.29414	0.000168276	uncharacterized LOC109540358
XM_019917993.1	NW_017851181.1	669.769	1.29197	0.00723186	cathepsin B-like
XM_019905459.1	NW_017852064.1	13883.3	1.28856	0.000165739	galactokinase-like
XM_019905599.1	NW_017848681.1	463.461	1.28603	1.05e-05	retinol dehydrogenase 13-like
XM_019898955.1	NW_017851612.1	11.6564	1.28286	0.00608527	laccase-7-like
XM_019904729.1	NW_017852055.1	26063.9	1.2827	0.000550394	uncharacterized LOC109537822%2C transcript variant X1
XM_019902903.1	NW_017852017.1	1027.92	1.28153	0.00257011	uncharacterized LOC109536617
XM_019915359.1	NW_017852370.1	1299.29	1.2777	8.09e-08	serine/threonine-protein kinase SIK2-like%2C transcript variant X1
XM_019909270.1	NW_017852156.1	46.7732	1.27744	0.00245916	uncharacterized LOC109540793
XM_019898880.1	NW_017851584.1	2019.13	1.27628	0.00294875	fatty acid synthase-like
XM_019916737.1	NW_017850628.1	409.292	1.27457	0.00375946	fatty acid synthase-like
XM_019907092.1	NW_017852096.1	145.594	1.27405	0.00148234	girdin-like
XM_019905234.1	NW_017852059.1	5692.28	1.27262	0.00342775	cytochrome P450 9e2-like
XM_019916532.1	NW_017852382.1	5132.67	1.27117	5.11e-06	aldose reductase-like
XM_019900395.1	NW_017851760.1	28370.9	1.26679	0.000433674	venom acid phosphatase Acph-1-like
XM_019909124.1	NW_017852132.1	30.425	1.26628	0.00882042	achaete-scute complex protein T4-like
XM_019908046.1	NW_017852109.1	1972.13	1.26438	8.02e-05	multidrug resistance-associated protein 4-like
XM_019902882.1	NW_017852017.1	54.8751	1.25979	0.00646418	choline dehydrogenase%2C mitochondrial-like
XM_019913048.1	NW_017852326.1	49992	1.25975	0.00572232	purine nucleoside phosphorylase-like
XM_019907481.1	NW_017852103.1	10963.2	1.2571	0.000384414	alpha-aminoadipic semialdehyde synthase%2C mitochondrial
XM_019916799.1	NW_017850733.1	33.6644	1.25588	1.95e-06	dnaJ homolog subfamily C member 24-like
XM_019917991.1	NW_017846261.1	33.6644	1.25588	1.95e-06	dnaJ homolog subfamily C member 24-like
XM_019916973.1	NW_017851084.1	24.0686	1.25385	0.00950841	uncharacterized LOC109546141
XM_019899137.1	NW_017851641.1	2052.85	1.25374	0.00416482	fatty acid synthase-like
XM_019906143.1	NW_017852076.1	953.965	1.24427	4.63e-05	nose resistant to fluoxetine protein 6-like%2C transcript variant X1
XM_019909700.1	NW_017849275.1	325.416	1.24335	5.22e-05	retinol dehydrogenase 13-like
XM_019917745.1	NW_017851174.1	8483.91	1.24086	7.53e-05	arginase-1
XR_002172166.1	NW_017849040.1	168.148	1.23902	0.00626956	uncharacterized LOC109540151
XM_019900427.1	NW_017851769.1	1040.21	1.23852	1.03e-05	monocarboxylate transporter 3-like
XM_019908720.1	NW_017852117.1	17.0162	1.23826	0.00963893	endocuticle structural glycoprotein SgAbd-2-like
XM_019899073.1	NW_017851633.1	35936.2	1.23576	0.000326684	bifunctional purine biosynthesis protein PURH%2C transcript variant X1
XM_019909108.1	NW_017852128.1	715.698	1.2307	0.00214608	myrosinase 1-like
XM_019916090.1	NW_017852381.1	5900.84	1.23065	6.06e-06	solute carrier family 25 member 35-like%2C transcript variant X1
XM_019907820.1	NW_017852106.1	17140.9	1.23027	1.57e-08	synaptic vesicle glycoprotein 2B-like%2C transcript variant X1
XM_019911045.1	NW_017849453.1	1299.26	1.22921	1.64e-05	uncharacterized LOC109542017
XM_019899906.1	NW_017851724.1	3497.63	1.22891	0.00037383	4-coumarate--CoA ligase 1-like
XM_019898251.1	NW_017846501.1	303.549	1.22812	6.25e-05	uncharacterized LOC109533057
XM_019898845.1	NW_017851567.1	303.549	1.22812	6.25e-05	uncharacterized LOC109533510
XM_019900426.1	NW_017851769.1	698.227	1.22498	2.86e-05	uncharacterized LOC109534680
XM_019912327.1	NW_017852302.1	2138.93	1.22441	0.00446646	synaptic vesicle glycoprotein 2B-like
XM_019905236.1	NW_017852059.1	10378.3	1.22388	3.35e-06	alcohol dehydrogenase [NADP(+)]-like
XR_002172142.1	NW_017852108.1	550.729	1.22051	0.00832685	uncharacterized LOC109539887
XM_019917728.1	NW_017851174.1	13.8606	1.21759	0.0010884	cuticle protein 7-like
XM_019900941.1	NW_017847288.1	838.797	1.2175	0.00717049	acyl-CoA synthetase family member 2%2C mitochondrial-like%2C transcript variant X1
XM_019906859.1	NW_017852091.1	3045.99	1.21699	0.000883972	probable U2 small nuclear ribonucleoprotein A'%2C transcript variant X1
XM_019914181.1	NW_017852355.1	2108.25	1.21341	0.000439167	5-oxoprolinase
XR_002172491.1	NW_017849761.1	170.501	1.21215	0.00715362	uncharacterized LOC109543427
XM_019900277.1	NW_017851739.1	8016.69	1.21159	0.00324718	cytochrome P450 4g1-like
XM_019914948.1	NW_017852366.1	37.3428	1.21138	0.00045097	uncharacterized LOC109544638
XM_019902065.1	NW_017851984.1	263.335	1.20813	0.00813886	myrosinase 1-like
XR_002172096.1	NW_017852091.1	830.275	1.20546	0.00157249	uncharacterized LOC109539211
XM_019905249.1	NW_017852059.1	4701.69	1.20306	0.00941288	rhamnogalacturonate lyase-like
XM_019900276.1	NW_017851739.1	7990.2	1.20281	0.00345584	cytochrome P450 4g1-like
XM_019905052.1	NW_017852056.1	1242.42	1.20247	0.000347506	protein eiger
XM_019906179.1	NW_017852077.1	23805.4	1.20031	0.00349741	cytochrome P450 4g15-like
XM_019905845.1	NW_017852073.1	1136.56	1.1965	0.00813452	acyl-CoA synthetase family member 2%2C mitochondrial-like%2C transcript variant X1
XM_019913131.1	NW_017849761.1	531.35	1.19625	0.00683164	fatty acid synthase-like
XM_019908034.1	NW_017852109.1	1968.45	1.19494	0.000345421	L-galactose dehydrogenase-like%2C transcript variant X1
XM_019910220.1	NW_017852180.1	5920.77	1.19177	6.68e-08	2-oxoisovalerate dehydrogenase subunit alpha%2C mitochondrial
XM_019910660.1	NW_017852245.1	2225.07	1.18932	0.00051987	venom serine carboxypeptidase-like
XM_019906720.1	NW_017852086.1	196.639	1.18699	0.000728551	argininosuccinate lyase
XM_019902077.1	NW_017851986.1	12.7462	1.1869	0.00817061	tubulin alpha-1 chain-like
XM_019904305.1	NW_017852037.1	680.683	1.18683	0.000284552	probable multidrug resistance-associated protein lethal(2)03659%2C transcript variant X1
XM_019898274.1	NW_017851382.1	3549.16	1.18532	0.00397495	glutathione S-transferase 1-like%2C transcript variant X1
XM_019907764.1	NW_017852105.1	79.5925	1.18487	0.00791624	peroxisomal acyl-coenzyme A oxidase 3-like
XM_019898574.1	NW_017851476.1	774.674	1.18474	0.00484063	venom carboxylesterase-6-like
XM_019901356.1	NW_017851863.1	266.27	1.18236	0.000195268	transmembrane and TPR repeat-containing protein CG4341-like
XM_019912259.1	NW_017852302.1	13481.3	1.18105	0.0012983	uncharacterized LOC109542840
XM_019917742.1	NW_017851174.1	29021.2	1.18026	0.000157342	fumarate hydratase%2C mitochondrial-like
XM_019897897.1	NW_017851276.1	15.8662	1.18017	0.00299423	uncharacterized LOC109532833
XM_019912291.1	NW_017852302.1	15774.2	1.17979	0.00351702	alpha-amylase-like
XM_019911562.1	NW_017849513.1	297.249	1.17961	0.000164581	uncharacterized LOC109542359
XM_019914314.1	NW_017852358.1	304.054	1.17779	0.000378749	NAD-dependent protein deacylase Sirt4
XR_002171690.1	NW_017851824.1	27.404	1.17507	0.00583835	uncharacterized LOC109535258%2C transcript variant X1
XM_019904272.1	NW_017852037.1	153.349	1.1741	0.00366857	uncharacterized LOC109537499
XM_019904609.1	NW_017852049.1	1428.21	1.15923	0.00858523	pathogenesis-related protein 5-like
XM_019911904.1	NW_017852299.1	775.196	1.15874	3.04e-05	retinol dehydrogenase 13-like
XM_019911698.1	NW_017852287.1	70.26	1.1574	0.00493885	androgen-dependent TFPI-regulating protein-like
XM_019912147.1	NW_017852302.1	558.686	1.15566	0.00217738	nuclear receptor subfamily 2 group E member 1
XM_019899913.1	NW_017851724.1	2990.34	1.15538	0.000162752	4-coumarate--CoA ligase 1-like
XM_019910545.1	NW_017852238.1	713.447	1.15501	0.00951771	phosphoglycolate phosphatase 1B%2C chloroplastic-like
XM_019915687.1	NW_017852377.1	1806.49	1.15437	9.33e-05	probable phospholipid hydroperoxide glutathione peroxidase%2C transcript variant X1
XM_019906204.1	NW_017848797.1	1806.52	1.15422	9.35e-05	probable phospholipid hydroperoxide glutathione peroxidase%2C transcript variant X1
XM_019917971.1	NW_017851181.1	184.839	1.15338	0.00560902	uncharacterized LOC109546834
XM_019915270.1	NW_017852369.1	1799.65	1.1508	0.00269246	UDP-glucuronosyltransferase 2B7-like
XM_019912787.1	NW_017852312.1	17.066	1.14686	0.00425964	delta-1-pyrroline-5-carboxylate synthase-like
XM_019900422.1	NW_017851769.1	879.206	1.14619	0.00177778	spermine oxidase-like
XM_019906541.1	NW_017852085.1	851.935	1.14506	9.16e-08	anoctamin-5
XM_019905804.1	NW_017852073.1	432.091	1.14103	0.0065393	acyl-CoA synthetase family member 2%2C mitochondrial-like
XM_019914620.1	NW_017852366.1	2373.02	1.141	5.17e-06	cytochrome b5-related protein
XM_019908963.1	NW_017852126.1	5179.77	1.14073	0.000585583	uncharacterized LOC109540536
XM_019908976.1	NW_017852126.1	1825.05	1.1394	0.00212751	uncharacterized LOC109540547
XM_019904204.1	NW_017848240.1	42819	1.13391	0.00223729	cytochrome P450 4g15-like
XM_019911689.1	NW_017849541.1	42815.7	1.13358	0.00224119	cytochrome P450 4g15-like
XR_002171902.1	NW_017848143.1	41.7877	1.13334	0.00938751	uncharacterized LOC109537179
XM_019904404.1	NW_017852038.1	2823.88	1.13135	0.000595271	neuroligin-4%2C X-linked-like%2C transcript variant X1
XM_019900203.1	NW_017851737.1	278.018	1.12952	0.00174127	uncharacterized LOC109534494
XM_019899873.1	NW_017851718.1	63605.1	1.12503	0.00240769	cytochrome P450 4g15-like
XM_019912260.1	NW_017852302.1	101019	1.12385	0.00172546	uncharacterized LOC109542841
XM_019916207.1	NW_017852381.1	37671.1	1.12085	0.00425346	facilitated trehalose transporter Tret1-like
XM_019904748.1	NW_017852055.1	1124.61	1.11983	0.000382083	monocarboxylate transporter 14-like
XM_019915795.1	NW_017852380.1	6955.18	1.11356	0.000326617	L-xylulose reductase-like
XM_019909101.1	NW_017852128.1	294.443	1.10981	0.00932073	uncharacterized LOC109540660
XM_019911852.1	NW_017852297.1	4703.37	1.10823	0.00232653	beta-hexosaminidase subunit alpha-like
XM_019913586.1	NW_017852340.1	1134.48	1.10689	0.00132882	uncharacterized LOC109543740%2C transcript variant X1
XM_019910236.1	NW_017852181.1	2257.76	1.10683	7.7e-05	geranylgeranyl pyrophosphate synthase%2C transcript variant X1
XM_019903357.1	NW_017852028.1	7298.41	1.10569	5.78e-10	transducin beta-like protein 2%2C transcript variant X1
XM_019905720.1	NW_017852070.1	510.546	1.10467	0.00581696	UDP-glucuronosyltransferase 2B17-like
XM_019898513.1	NW_017851452.1	106.208	1.10359	0.0018625	uncharacterized MFS-type transporter C09D4.1-like%2C transcript variant X1
XM_019904632.1	NW_017852049.1	13392.5	1.10338	2.51e-06	ornithine aminotransferase%2C mitochondrial%2C transcript variant X1
XM_019917604.1	NW_017851169.1	811.517	1.1022	5.63e-07	multidrug resistance-associated protein 4-like
XM_019901716.1	NW_017851937.1	6624.16	1.10197	4.62e-05	ankyrin-3%2C transcript variant X1
XM_019903649.1	NW_017852030.1	3833.66	1.10042	0.00478606	pectinesterase B-like
XM_019912353.1	NW_017852302.1	504.347	1.09813	4.36e-07	ADP-ribosylation factor-like protein 6-interacting protein 4
XM_019917279.1	NW_017844923.1	61.2482	1.09274	2.82e-05	uncharacterized LOC109546325
XM_019914968.1	NW_017852366.1	9189.09	1.09038	0.00385139	enoyl-CoA hydratase%2C mitochondrial-like
XM_019908988.1	NW_017852126.1	2803.48	1.08871	7.66e-05	uncharacterized LOC109540558%2C transcript variant X1
XM_019917697.1	NW_017851171.1	120.26	1.085	0.000450612	protein spaetzle-like
XM_019906136.1	NW_017852075.1	435.671	1.08496	4.13e-05	growth/differentiation factor 11
XM_019899086.1	NW_017851633.1	1789.77	1.08439	1.43e-05	uncharacterized LOC109533701%2C transcript variant X1
XM_019917499.1	NW_017851160.1	186.502	1.08152	2.88e-05	kinesin-like protein KLP2
XM_019904886.1	NW_017852056.1	76.1744	1.07956	0.00570316	uncharacterized LOC109537921
XM_019903625.1	NW_017852030.1	6840.91	1.07753	0.000228238	acetyl-CoA carboxylase%2C transcript variant X1
XM_019901742.1	NW_017851937.1	5344.63	1.07053	0.000751142	kidney mitochondrial carrier protein 1%2C transcript variant X1
XM_019913888.1	NW_017852348.1	77.1199	1.06954	1.65e-05	probable histone-lysine N-methyltransferase set-23
XM_019902085.1	NW_017851990.1	14.6618	1.06911	0.00970362	lachesin-like
XM_019903805.1	NW_017852034.1	422.619	1.06628	0.00186302	uncharacterized LOC109537199
XM_019902342.1	NW_017847751.1	747.782	1.06361	0.00673479	carboxypeptidase Q-like%2C transcript variant X1
XM_019903100.1	NW_017847924.1	747.782	1.06361	0.00673479	carboxypeptidase Q-like%2C transcript variant X1
XM_019903429.1	NW_017852028.1	913.887	1.06234	1.13e-07	polypeptide N-acetylgalactosaminyltransferase 3-like%2C transcript variant X1
XM_019911108.1	NW_017852258.1	9938.77	1.05996	0.0023345	zinc transporter ZIP13-like
XM_019907029.1	NW_017852096.1	2828.52	1.05914	0.00233597	diphosphomevalonate decarboxylase%2C transcript variant X1
XM_019917605.1	NW_017851169.1	529.253	1.05497	1.59e-06	multidrug resistance-associated protein 4-like
XM_019902287.1	NW_017847751.1	235.582	1.05145	0.00200908	proclotting enzyme-like
XM_019903168.1	NW_017847924.1	235.43	1.05125	0.00200889	proclotting enzyme-like
XR_002171629.1	NW_017851724.1	70.4572	1.05075	0.000265186	uncharacterized LOC109534406
XM_019899617.1	NW_017851689.1	864.135	1.04758	0.00875476	Niemann-Pick type protein homolog 1B-like%2C transcript variant X1
XM_019908670.1	NW_017852117.1	17.4641	1.0444	0.00419901	nose resistant to fluoxetine protein 6-like%2C transcript variant X1
XR_002172168.1	NW_017852115.1	106.526	1.04154	2.55e-08	uncharacterized LOC109540178
XM_019901831.1	NW_017851943.1	8538.01	1.03954	0.00952437	uncharacterized LOC109535825
XR_002171630.1	NW_017851724.1	67.1863	1.03628	0.00034039	uncharacterized LOC109534407
XM_019900496.1	NW_017851775.1	5849.12	1.03565	0.00223424	esterase E4-like
XM_019911438.1	NW_017852269.1	4319.33	1.03551	0.000712077	juvenile hormone epoxide hydrolase 1-like
XM_019904121.1	NW_017852037.1	8394.83	1.03355	0.000110097	zinc finger protein chinmo-like%2C transcript variant X1
LOC109538019	NW_017848529.1	514.084	1.03213	0.00233816	none
XM_019904639.1	NW_017852049.1	836.886	1.03193	0.00036765	fatty acyl-CoA reductase 1-like
XR_002172113.1	NW_017852097.1	164.11	1.03146	0.00223729	uncharacterized LOC109539402
XM_019914901.1	NW_017852366.1	5870.91	1.03027	1.09e-05	putative inorganic phosphate cotransporter%2C transcript variant X1
XM_019916116.1	NW_017852381.1	278.994	1.02842	0.000539239	aminopeptidase M1-A-like%2C transcript variant X1
XM_019902991.1	NW_017852017.1	1632.53	1.02638	0.000174277	uncharacterized LOC109536676
XM_019905512.1	NW_017852064.1	1866.25	1.02568	0.000842093	tolloid-like protein 1%2C transcript variant X1
XM_019908456.1	NW_017852115.1	1592.72	1.02343	4.24e-07	serine/threonine-protein kinase haspin-like
XM_019903766.1	NW_017852032.1	14956	1.0229	0.000101083	myotubularin-related protein 14%2C transcript variant X1
XM_019900512.1	NW_017851775.1	701.914	1.01977	3.11e-05	hydroxysteroid dehydrogenase-like protein 1
XM_019905081.1	NW_017852057.1	1368.13	1.01931	4.4e-05	uncharacterized LOC109538042%2C transcript variant X1
XM_019912891.1	NW_017852320.1	220.889	1.01871	0.00346583	uncharacterized LOC109543272
XM_019905260.1	NW_017852060.1	11601.3	1.01811	1.62e-05	prostaglandin reductase 1-like
XM_019911377.1	NW_017852267.1	7079.31	1.01617	0.000290058	TGF-beta receptor type-1%2C transcript variant X1
XM_019898218.1	NW_017851346.1	1256.48	1.01476	0.00336081	UDP-glucuronosyltransferase 1-8-like
XM_019917500.1	NW_017851160.1	96.3277	1.01453	0.000284962	uncharacterized LOC109546521
XM_019913011.1	NW_017852322.1	2442.15	1.01428	5.66e-05	ATP-binding cassette sub-family B member 10%2C mitochondrial%2C transcript variant X1
XM_019907119.1	NW_017852097.1	545.524	1.01428	0.00320716	coiled-coil domain-containing protein 8 homolog
XM_019906769.1	NW_017852088.1	5510.72	1.0137	0.000359953	zinc finger protein 385B-like
XR_002171971.1	NW_017852055.1	267.545	1.01248	0.0056726	citrate lyase subunit beta-like protein%2C mitochondrial%2C transcript variant X1
XM_019911135.1	NW_017852258.1	38124.8	1.01224	0.000112682	calreticulin
XM_019904414.1	NW_017852038.1	6057.35	1.00994	0.00524531	putative ammonium transporter 2
XM_019899846.1	NW_017846947.1	1813.39	1.00797	0.00261425	V-type proton ATPase 16 kDa proteolipid subunit-like
XM_019911800.1	NW_017852296.1	1218.41	1.00711	6.59e-07	mannose-P-dolichol utilization defect 1 protein homolog%2C transcript variant X1
XM_019915339.1	NW_017852369.1	558.232	1.00312	0.000403646	maternal embryonic leucine zipper kinase-like
XM_019911998.1	NW_017852300.1	256.103	1.00255	0.00701559	UPF0585 protein CG18661
XM_019908715.1	NW_017852117.1	2276.94	1.00008	0.00463851	uncharacterized LOC109540361%2C transcript variant X1
XM_019902107.1	NW_017851993.1	377.375	0.999992	0.00692047	synaptotagmin-3-like
LOC109533071	NW_017846514.1	78.8783	0.999275	0.00334658	none
XM_019907988.1	NW_017852108.1	972.325	0.997744	0.00240334	uncharacterized LOC109539912
XM_019915446.1	NW_017845826.1	654.73	0.996494	4.23e-05	uncharacterized LOC109544968
XM_019917045.1	NW_017851084.1	1908.23	0.996224	0.00169827	ras-related and estrogen-regulated growth inhibitor%2C transcript variant X1
XM_019917829.1	NW_017851174.1	3303.29	0.991567	0.000615078	uncharacterized LOC109546745
XM_019910947.1	NW_017852254.1	11730.2	0.991344	0.00847856	ATP-binding cassette sub-family A member 3-like
XM_019913385.1	NW_017852336.1	16032.2	0.991044	1.06e-05	farnesyl pyrophosphate synthase%2C transcript variant X1
XM_019916368.1	NW_017852381.1	79.4633	0.990783	0.00546944	glutamate receptor ionotropic%2C kainate 2-like
XM_019910884.1	NW_017849431.1	277.025	0.989509	7.65e-05	sodium channel protein 60E-like
XM_019902073.1	NW_017851984.1	3963.7	0.98868	0.0018898	uncharacterized LOC109536009%2C transcript variant X1
XM_019898897.1	NW_017851590.1	1945.25	0.987669	0.00196418	mitochondrial amidoxime reducing component 2-like%2C transcript variant X1
XM_019904569.1	NW_017852045.1	1939.07	0.987352	0.0035217	V-type proton ATPase 16 kDa proteolipid subunit-like
XM_019898437.1	NW_017851434.1	1369.05	0.986309	0.00233572	endothelin-converting enzyme 1-like
XM_019898202.1	NW_017851323.1	1890.61	0.985333	1.14e-06	45 kDa calcium-binding protein%2C transcript variant X1
XM_019905121.1	NW_017852058.1	27.1777	0.983453	0.00292988	cytochrome c oxidase subunit 4 isoform 1%2C mitochondrial-like
XR_002172066.1	NW_017852077.1	179.854	0.983262	0.000415631	uncharacterized LOC109538798
XM_019900382.1	NW_017851760.1	1433.39	0.982111	0.000215597	uncharacterized LOC109534643%2C transcript variant X1
XM_019912796.1	NW_017852312.1	3876.44	0.981365	0.00691767	uncharacterized LOC109543212
XM_019902696.1	NW_017852012.1	10676.2	0.977888	0.000513859	putative vitellogenin receptor%2C transcript variant X1
XM_019916896.1	NW_017850933.1	518.342	0.977352	0.00356868	uncharacterized LOC109546061
XM_019902311.1	NW_017852003.1	52.2848	0.975842	0.00854337	uncharacterized LOC109536199
XM_019904203.1	NW_017852037.1	1135.95	0.973652	8.23e-05	dual specificity protein phosphatase 14-like
XM_019909337.1	NW_017849221.1	292.189	0.973322	0.000115603	sodium channel protein 60E-like
XM_019914383.1	NW_017852358.1	165.775	0.972726	0.00122047	mannose-binding protein C
XM_019915591.1	NW_017852375.1	1073.59	0.971443	5.22e-05	glycerate kinase
XM_019899789.1	NW_017851704.1	62.3553	0.97106	0.0016932	UDP-glucuronosyltransferase 2B10-like
XM_019899041.1	NW_017851628.1	204.793	0.967305	0.00687227	origin recognition complex subunit 6
XM_019897792.1	NW_017851239.1	193.834	0.967194	0.00184979	uracil-DNA glycosylase-like
XM_019906507.1	NW_017852083.1	733.662	0.966329	0.00128263	uncharacterized LOC109539002
XM_019900148.1	NW_017851737.1	1067.94	0.965475	0.00322181	probable galactose-1-phosphate uridylyltransferase
XM_019915773.1	NW_017852380.1	9208.14	0.965467	0.0037545	maltase 2-like%2C transcript variant X1
XM_019912772.1	NW_017852312.1	2275.77	0.964456	1.16e-06	thioredoxin domain-containing protein 5 homolog
XM_019906071.1	NW_017848776.1	1374.14	0.962534	0.00517438	V-type proton ATPase 16 kDa proteolipid subunit-like
XM_019899282.1	NW_017851651.1	35813.6	0.962371	0.00299072	SEC23-interacting protein%2C transcript variant X1
XM_019899773.1	NW_017851704.1	2192.93	0.961784	0.000294619	major facilitator superfamily domain-containing protein 9-like%2C transcript variant X1
XM_019902050.1	NW_017851980.1	1663.14	0.961105	0.00223729	uncharacterized LOC109535989%2C transcript variant X1
XM_019902078.1	NW_017851987.1	53.1207	0.960391	8.23e-05	protein timeless homolog
XM_019909347.1	NW_017852166.1	1719.38	0.960203	0.00096006	uncharacterized LOC109540857
XM_019918244.1	NW_017851217.1	1011.61	0.959571	0.00141102	protein ovarian tumor locus-like
XM_019915846.1	NW_017850306.1	1374.13	0.958811	0.00545363	V-type proton ATPase 16 kDa proteolipid subunit-like
XM_019904248.1	NW_017852037.1	245.48	0.958299	0.00499321	calcitonin gene-related peptide type 1 receptor-like%2C transcript variant X1
XM_019907492.1	NW_017852103.1	1386.54	0.956466	6.56e-06	phosphoglucomutase-2-like%2C transcript variant X1
XM_019908718.1	NW_017852117.1	4019.67	0.954203	0.00174175	uncharacterized LOC109540362
XM_019903274.1	NW_017852026.1	26.7698	0.952527	0.0058834	NEDD8-like
XM_019914833.1	NW_017852366.1	2753.52	0.95102	0.000625575	dihydropyrimidine dehydrogenase [NADP(+)]
XM_019899101.1	NW_017851633.1	16931.3	0.949869	0.00234223	uncharacterized LOC109533709%2C transcript variant X1
XM_019914249.1	NW_017852355.1	819.517	0.949118	0.00205475	m-AAA protease-interacting protein 1%2C mitochondrial
XM_019903270.1	NW_017852026.1	5098.4	0.948611	0.00713279	N-acylneuraminate-9-phosphatase%2C transcript variant X1
XM_019901095.1	NW_017847345.1	526.871	0.947727	0.00148716	SID1 transmembrane family member 2-like
XM_019908288.1	NW_017852110.1	160.399	0.94413	0.000676753	phospholipase B1%2C membrane-associated-like
XM_019917912.1	NW_017851181.1	16254.4	0.94386	2.34e-05	malate dehydrogenase%2C mitochondrial
XM_019899182.1	NW_017851649.1	796.209	0.943614	0.000687507	uncharacterized LOC109533777
XM_019905080.1	NW_017852057.1	580.935	0.943227	0.000349856	uncharacterized LOC109538041
XM_019908702.1	NW_017852117.1	1177.66	0.940953	0.00245825	transcription factor Sox-14
XM_019905183.1	NW_017852058.1	331.257	0.938923	7.66e-06	haloacid dehalogenase-like hydrolase domain-containing protein 2
XM_019914486.1	NW_017852363.1	655.761	0.938439	0.00089126	protein abnormal spindle-like%2C transcript variant X1
XM_019907504.1	NW_017852103.1	23344.3	0.936505	0.000373083	mitochondrial enolase superfamily member 1-like
XM_019912589.1	NW_017852308.1	265.226	0.930845	0.000415631	cytochrome P450 306a1
XM_019913381.1	NW_017852336.1	2396.23	0.93062	0.00418539	uncharacterized LOC109543588
XM_019904273.1	NW_017852037.1	5098.17	0.929957	2.08e-06	uncharacterized LOC109537501
XM_019917786.1	NW_017851174.1	1434.98	0.929512	0.00481614	deoxyribose-phosphate aldolase
XM_019899668.1	NW_017851694.1	2823.44	0.925884	0.000415631	isopentenyl-diphosphate Delta-isomerase 1
XM_019910128.1	NW_017852176.1	350.16	0.924507	0.00129453	protein ABHD11-like%2C transcript variant X1
XM_019907335.1	NW_017852103.1	321.943	0.924319	0.000266539	UPF0545 protein C22orf39 homolog
XM_019899564.1	NW_017851680.1	221.034	0.923488	0.00169095	uncharacterized LOC109534019
XM_019914118.1	NW_017852350.1	768.123	0.92079	0.00831993	rutC family protein UK114
XM_019911132.1	NW_017852258.1	39363.9	0.920467	0.00305815	sterol O-acyltransferase 1
XM_019904979.1	NW_017852056.1	935.329	0.917411	0.00440077	uncharacterized LOC109537971
XM_019903419.1	NW_017852028.1	321.4	0.916606	0.000625834	G1/S-specific cyclin-E
XM_019904638.1	NW_017848371.1	644.666	0.916601	0.00403667	SID1 transmembrane family member 1-like
XM_019914949.1	NW_017852366.1	325.369	0.91514	0.00134473	voltage-dependent T-type calcium channel subunit alpha-1G-like
XM_019908376.1	NW_017852115.1	3014.67	0.913159	3.27e-07	uncharacterized LOC109540156
XM_019909244.1	NW_017852156.1	11096.9	0.912803	1.44e-07	6-phosphogluconate dehydrogenase%2C decarboxylating
XM_019899763.1	NW_017851702.1	12058.3	0.912285	0.000143297	uncharacterized LOC109534191
XM_019916886.1	NW_017850913.1	12058.2	0.912206	0.000143308	uncharacterized LOC109546052
XM_019904956.1	NW_017852056.1	6662.19	0.911555	0.000934632	5-aminolevulinate synthase%2C erythroid-specific%2C mitochondrial
XM_019898436.1	NW_017851434.1	310.599	0.910794	0.00206628	bombesin receptor subtype-3-like
XM_019901428.1	NW_017851888.1	1342.05	0.908506	0.00775116	fibrous sheath CABYR-binding protein-like
XM_019899742.1	NW_017851697.1	139.781	0.90664	0.00382437	UDP-glucuronosyltransferase 2B15-like
XM_019909100.1	NW_017852128.1	8255.68	0.906431	0.00959891	fumarylacetoacetase
XM_019903356.1	NW_017852028.1	89.0341	0.905989	0.00512171	sialin-like
XM_019912799.1	NW_017852312.1	2054.67	0.905107	0.00592843	uncharacterized LOC109543214
XM_019906085.1	NW_017852073.1	1102.08	0.900787	0.00235779	E3 ubiquitin-protein ligase SINAT2-like%2C transcript variant X1
XM_019911832.1	NW_017852296.1	7357.99	0.90062	0.00124296	pantothenate kinase 4
XM_019909018.1	NW_017852128.1	191.005	0.899431	0.00397495	transmembrane protease serine 9-like
XR_002172389.1	NW_017852254.1	1051.46	0.899057	0.00621577	uncharacterized LOC109541959
XM_019902261.1	NW_017852003.1	1375.73	0.898476	6.57e-09	proteasome assembly chaperone 2
XM_019913782.1	NW_017852342.1	98.1894	0.898304	0.00208355	uncharacterized LOC109543864
XM_019913589.1	NW_017852340.1	4193.7	0.89443	0.000721637	phosphoglycerate kinase
XM_019916494.1	NW_017852382.1	4774.15	0.893905	0.00339421	hydroxymethylglutaryl-CoA synthase 1
XM_019916002.1	NW_017852380.1	927.901	0.892725	0.0015756	uncharacterized LOC109545349%2C transcript variant X1
XM_019905815.1	NW_017852073.1	152.409	0.892335	0.00838778	uncharacterized LOC109538551
XR_002172717.1	NW_017850753.1	661.25	0.89003	0.00994678	uncharacterized LOC109545966
XR_002172714.1	NW_017850709.1	661.326	0.890023	0.00994678	uncharacterized LOC109545936
XM_019902683.1	NW_017852012.1	10701.6	0.88666	0.00966422	N-acetylneuraminate lyase-like%2C transcript variant X1
XM_019904980.1	NW_017852056.1	646.711	0.886508	0.00124633	actin-like protein 6B%2C transcript variant X1
XM_019917344.1	NW_017851138.1	5365.41	0.885498	0.00257011	uncharacterized LOC109546393
XM_019901400.1	NW_017851876.1	206.937	0.883621	0.000534156	separin
XM_019907093.1	NW_017852096.1	733.125	0.883535	2.95e-07	ankyrin repeat domain-containing protein SOWAHC%2C transcript variant X1
XM_019905740.1	NW_017852071.1	2215.62	0.882809	4.86e-05	kinesin-like protein subito%2C transcript variant X1
XM_019914519.1	NW_017852363.1	2661.27	0.882739	0.00381481	CKLF-like MARVEL transmembrane domain-containing protein 4
XM_019915278.1	NW_017850235.1	587.279	0.882614	0.0018989	uncharacterized LOC109544872
XM_019909956.1	NW_017852166.1	1319.73	0.882318	0.00184824	protein cortex-like
XM_019900648.1	NW_017851783.1	800.384	0.882218	0.00187604	bone morphogenetic protein 7-like
XM_019912051.1	NW_017852300.1	769.77	0.88171	0.00271536	uncharacterized LOC109542716
XM_019910917.1	NW_017852254.1	5109.53	0.881672	0.00419901	ATP-binding cassette sub-family A member 3-like
XM_019916069.1	NW_017852381.1	583.643	0.881315	0.00854337	SID1 transmembrane family member 1-like
XM_019909420.1	NW_017852166.1	52.7545	0.88119	0.00719354	heat shock protein 67B2-like
XM_019900281.1	NW_017851743.1	2999.24	0.880537	0.000752862	insulin receptor-like
XM_019899008.1	NW_017846692.1	684.893	0.880386	0.00739265	SID1 transmembrane family member 1-like
XM_019909109.1	NW_017852128.1	422.237	0.879309	0.000268404	uncharacterized LOC109540665
XR_002172128.1	NW_017852103.1	1495.58	0.878698	0.000721053	uncharacterized LOC109539563
XM_019905553.1	NW_017852064.1	664.932	0.876903	0.00100032	ovarian-specific serine/threonine-protein kinase Lok-like
LOC109540606	NW_017849172.1	4464.99	0.87582	0.00921557	none
XM_019912155.1	NW_017852302.1	565.123	0.872543	0.00224119	serine/threonine-protein kinase mos
XM_019898408.1	NW_017851407.1	141.85	0.869922	0.00436204	carboxy-terminal kinesin 2-like
XM_019917256.1	NW_017851125.1	3711.55	0.868534	0.00871437	uncharacterized LOC109546340
XM_019913469.1	NW_017852337.1	431.639	0.866147	0.00143378	decaprenyl-diphosphate synthase subunit 2-like%2C transcript variant X1
XM_019912789.1	NW_017852312.1	1959.47	0.862817	0.00525883	uncharacterized LOC109543204
XM_019898568.1	NW_017851470.1	374.379	0.861064	3.86e-05	THAP domain-containing protein 2-like%2C transcript variant X1
XM_019916551.1	NW_017852383.1	1032.52	0.860799	0.00781672	venom dipeptidyl peptidase 4-like
XM_019915033.1	NW_017850199.1	274.632	0.860215	0.00361606	spermine oxidase-like%2C transcript variant X1
XM_019910793.1	NW_017852245.1	844.719	0.860039	0.00134473	COP9 signalosome complex subunit 1-like%2C transcript variant X1
XM_019902072.1	NW_017851984.1	792.592	0.859888	0.00961211	neprilysin-1-like
XM_019900280.1	NW_017851743.1	1131.5	0.859715	0.00114232	putative molluscan insulin-related peptide(s) receptor
XM_019913776.1	NW_017852342.1	158.608	0.859038	0.00146758	Werner Syndrome-like exonuclease
XM_019904674.1	NW_017852052.1	414.323	0.857799	0.000157006	zinc finger protein rotund-like%2C transcript variant X1
XM_019898016.1	NW_017846438.1	239.931	0.856763	0.00284796	insulin receptor-like
XM_019912400.1	NW_017852305.1	1364.22	0.856432	0.00211545	high mobility group protein HMGI-C
XM_019907455.1	NW_017848933.1	1012.47	0.854915	0.00795543	venom dipeptidyl peptidase 4-like
XM_019903777.1	NW_017852032.1	1260.8	0.853291	1.44e-08	ATP-dependent Clp protease proteolytic subunit
XM_019910436.1	NW_017852217.1	801.293	0.851806	0.000101015	monocarboxylate transporter 12-like
XM_019903621.1	NW_017852030.1	15221.7	0.85084	0.00764235	cytochrome b561%2C transcript variant X1
XM_019918085.1	NW_017851187.1	732.683	0.850095	0.00257369	uncharacterized LOC109546913%2C transcript variant X1
XM_019910671.1	NW_017852245.1	852.32	0.849305	0.00716177	putative fatty acyl-CoA reductase CG5065
XR_002172637.1	NW_017850264.1	71.7618	0.848339	0.00104287	uncharacterized LOC109545080
XM_019913271.1	NW_017849791.1	1517.9	0.845715	0.000255593	mitochondrial amidoxime reducing component 2-like%2C transcript variant X1
XM_019899407.1	NW_017851651.1	362.636	0.845425	0.00412611	M-phase inducer phosphatase-like%2C transcript variant X1
XM_019913255.1	NW_017849790.1	1518.28	0.844924	0.000256123	mitochondrial amidoxime reducing component 2-like%2C transcript variant X1
XM_019915962.1	NW_017852380.1	2648.25	0.844877	0.000510368	inositol-3-phosphate synthase%2C transcript variant X1
XM_019909380.1	NW_017852166.1	11868.6	0.843851	0.000306305	protein disulfide-isomerase A3
XM_019908374.1	NW_017852115.1	2368.77	0.843724	8.25e-06	uncharacterized LOC109540154
XM_019897977.1	NW_017851282.1	11920.7	0.842927	0.00390455	uncharacterized LOC109532875%2C transcript variant X1
XM_019915578.1	NW_017852375.1	2076.42	0.842113	0.000232389	mitochondrial amidoxime reducing component 2-like%2C transcript variant X1
XM_019905109.1	NW_017852058.1	57.8133	0.839978	8.42e-05	zinc finger protein 62-like
XM_019912320.1	NW_017849639.1	289.054	0.839356	0.00132589	insulin-like growth factor 1 receptor
XM_019906512.1	NW_017852083.1	3495.62	0.838122	0.00725841	alkaline phosphatase%2C tissue-nonspecific isozyme-like%2C transcript variant X1
XM_019913950.1	NW_017852349.1	1745.93	0.83449	0.00334452	uncharacterized LOC109543987%2C transcript variant X1
XM_019897963.1	NW_017851282.1	9892.18	0.834361	0.000339931	epidermal growth factor receptor kinase substrate 8-like protein 2%2C transcript variant X1
XM_019902438.1	NW_017852012.1	6608.83	0.832854	0.000583823	deoxyuridine 5'-triphosphate nucleotidohydrolase
XM_019915584.1	NW_017852375.1	4971.87	0.831038	6.15e-05	alpha-N-acetylglucosaminidase
XM_019898061.1	NW_017846446.1	3547.86	0.830981	0.00127536	phytanoyl-CoA dioxygenase%2C peroxisomal-like
XM_019899495.1	NW_017851666.1	3547.86	0.830972	0.00127958	phytanoyl-CoA dioxygenase%2C peroxisomal-like
XM_019898572.1	NW_017851470.1	650.167	0.828999	0.000318328	monocarboxylate transporter 12-B-like
XM_019913438.1	NW_017852337.1	559.575	0.828935	0.00524998	sodium-coupled monocarboxylate transporter 1-like
XR_002171748.1	NW_017851937.1	430.241	0.826417	0.00233597	uncharacterized LOC109535711%2C transcript variant X1
XM_019900205.1	NW_017851737.1	5547.51	0.823932	8.02e-05	ras-specific guanine nucleotide-releasing factor RalGPS1-like%2C transcript variant X1
XM_019913370.1	NW_017852336.1	109.843	0.823745	0.00155335	nucleoside diphosphate kinase 7
XM_019910397.1	NW_017852201.1	347.06	0.823393	3.35e-05	ribonuclease H2 subunit A
XM_019917542.1	NW_017851160.1	1488.88	0.823101	0.00345584	uncharacterized LOC109546550
XM_019900421.1	NW_017847141.1	2137.63	0.82275	0.00085853	anaphase-promoting complex subunit 4-like
XM_019916053.1	NW_017852380.1	641.71	0.822387	0.00724314	zinc finger and BTB domain-containing protein 8A-like%2C transcript variant X1
XM_019908406.1	NW_017852115.1	1854.76	0.822147	2.07e-06	uncharacterized LOC109540174%2C transcript variant X1
XM_019903221.1	NW_017852021.1	1103.06	0.822117	0.000115803	NFU1 iron-sulfur cluster scaffold homolog%2C mitochondrial-like
XM_019899433.1	NW_017851656.1	95.4649	0.81957	0.00124035	uncharacterized LOC109533920
XM_019913366.1	NW_017852336.1	685.093	0.81925	0.000742179	protein nessun dorma-like
XM_019910936.1	NW_017852254.1	9649.78	0.818265	0.00260082	glycerol kinase-like%2C transcript variant X1
XM_019914057.1	NW_017852350.1	1226.62	0.817165	0.000362805	cyclin-dependent kinase 1
XM_019905088.1	NW_017852058.1	100.415	0.816628	0.000143452	zinc finger protein 678-like
XM_019905168.1	NW_017852058.1	2649.31	0.814368	0.00131588	glutathione S-transferase-like
XM_019902869.1	NW_017852016.1	269.987	0.813303	0.00493421	spermine oxidase-like%2C transcript variant X1
XM_019909454.1	NW_017852166.1	3054.93	0.81149	0.00546143	uncharacterized LOC109540914%2C transcript variant X1
XM_019905084.1	NW_017852058.1	72.2925	0.8114	0.00144493	zinc finger protein OZF-like
XM_019899551.1	NW_017851680.1	214.551	0.811398	0.00899322	uncharacterized LOC109534009
XM_019914495.1	NW_017850060.1	1345.52	0.810523	0.00143991	anaphase-promoting complex subunit 4-like
XM_019916950.1	NW_017851049.1	1345.67	0.810329	0.00144493	anaphase-promoting complex subunit 4-like
XM_019900521.1	NW_017851775.1	5641.53	0.807933	0.00207658	aspartate aminotransferase%2C cytoplasmic
XM_019910857.1	NW_017852247.1	807.601	0.80779	0.00131588	uncharacterized oxidoreductase C30D10.05c-like
XM_019905926.1	NW_017852073.1	11973.5	0.807081	0.00493755	collagen alpha-5(IV) chain
XM_019917790.1	NW_017851174.1	4098.44	0.80687	0.000542167	methylcrotonoyl-CoA carboxylase subunit alpha%2C mitochondrial
XM_019903443.1	NW_017852028.1	1191.33	0.805687	0.00993533	bone morphogenetic protein receptor type-1B-like
XM_019910649.1	NW_017852245.1	3257.36	0.805642	0.0084275	rhythmically expressed gene 2 protein-like
XM_019910821.1	NW_017852245.1	3750.73	0.805373	0.00101605	glycine cleavage system H protein%2C mitochondrial
XM_019908689.1	NW_017852117.1	50465.2	0.805166	0.00387653	uncharacterized LOC109540340%2C transcript variant X1
XM_019900078.1	NW_017851724.1	394.342	0.804224	0.00636244	uncharacterized LOC109534405
XM_019901433.1	NW_017851888.1	632.322	0.803968	0.00024523	CD151 antigen-like
XM_019917154.1	NW_017851087.1	137.738	0.803221	0.00627508	hexosaminidase D-like
XM_019898885.1	NW_017851587.1	1065.11	0.803125	0.00497515	E3 ubiquitin-protein ligase SINAT2-like%2C transcript variant X1
XM_019908494.1	NW_017852115.1	52167.2	0.802375	0.00156235	short/branched chain specific acyl-CoA dehydrogenase%2C mitochondrial
XM_019897779.1	NW_017851239.1	4859.16	0.802117	1.21e-06	thioredoxin-like protein 1
XM_019915159.1	NW_017852369.1	515.554	0.799068	0.00139383	uncharacterized LOC109544807
XM_019909740.1	NW_017852166.1	286.251	0.798448	0.00126508	chitooligosaccharidolytic beta-N-acetylglucosaminidase%2C transcript variant X1
XM_019903654.1	NW_017852030.1	1699.2	0.796914	2.42e-06	uncharacterized aarF domain-containing protein kinase 5%2C transcript variant X1
XM_019913019.1	NW_017852323.1	3112.79	0.795317	0.00558578	ipsdienol dehydrogenase-like
XM_019898623.1	NW_017851499.1	419.782	0.794885	0.00637787	monocarboxylate transporter 12-like
XM_019914168.1	NW_017852353.1	572.151	0.793178	0.000186217	ubiquinone biosynthesis O-methyltransferase%2C mitochondrial%2C transcript variant X1
XM_019905112.1	NW_017852058.1	116.601	0.792966	0.00341572	zinc finger protein 525-like
XM_019918029.1	NW_017846269.1	1840.61	0.792942	0.00547011	6-phosphogluconate dehydrogenase%2C decarboxylating-like
XM_019898320.1	NW_017851382.1	662.743	0.791882	0.000219685	uncharacterized LOC109533090
XM_019915178.1	NW_017852369.1	1296.16	0.791827	3.19e-06	nardilysin-like%2C transcript variant X1
XM_019905722.1	NW_017852070.1	4511.29	0.790343	0.0018758	farnesol dehydrogenase-like
XM_019911134.1	NW_017852258.1	23260.9	0.789773	7.93e-05	endoplasmin
XM_019915845.1	NW_017852380.1	1386.87	0.786802	1.4e-06	bifunctional coenzyme A synthase-like
LOC109544877	NW_017850235.1	299.492	0.786455	0.00524531	none
XM_019917525.1	NW_017851160.1	207.881	0.786376	0.00316385	cytochrome P450 9e2-like%2C transcript variant X1
LOC109533412	NW_017846633.1	299.12	0.785567	0.00530549	none
LOC109534562	NW_017851743.1	299.12	0.785567	0.00530549	none
XM_019908457.1	NW_017852115.1	1229.8	0.784526	0.000975657	UPF0562 protein C7orf55
XM_019911143.1	NW_017852258.1	7452.97	0.784171	0.00646418	equilibrative nucleoside transporter 1%2C transcript variant X1
XM_019916995.1	NW_017851084.1	651.857	0.784064	9.54e-06	exosome complex component RRP4
XR_002172528.1	NW_017852342.1	384.051	0.783452	0.00102976	uncharacterized LOC109543804
XM_019903935.1	NW_017852037.1	429.32	0.782684	1.49e-06	GPI transamidase component PIG-S
XM_019901283.1	NW_017851858.1	3084.86	0.782667	0.00272865	probable phospholipid-transporting ATPase IA%2C transcript variant X1
XM_019914296.1	NW_017852358.1	2588.05	0.782115	0.000240386	flotillin-2%2C transcript variant X1
XM_019901048.1	NW_017851824.1	1198.96	0.781597	0.00065557	protein aurora borealis
XM_019899316.1	NW_017851651.1	18069.9	0.781022	7.81e-08	cytokine receptor%2C transcript variant X1
XM_019906531.1	NW_017852083.1	2571.11	0.780515	0.00985253	cyclin-A2-like
XM_019913092.1	NW_017849749.1	131.842	0.780365	0.00701134	uncharacterized protein C19orf52-like
XM_019917146.1	NW_017851087.1	8782.72	0.780316	0.0065393	succinyl-CoA:3-ketoacid coenzyme A transferase 1%2C mitochondrial
XM_019908485.1	NW_017849067.1	1592.37	0.776349	0.000155354	26S proteasome non-ATPase regulatory subunit 4-like
XM_019898664.1	NW_017851512.1	64.4471	0.775983	0.00560902	uncharacterized LOC109533362
XM_019901462.1	NW_017851898.1	121.204	0.775575	0.00211018	CUE domain-containing protein 2
XM_019906886.1	NW_017848910.1	575.366	0.77552	0.00346583	alpha-N-acetylgalactosaminidase-like
XM_019898811.1	NW_017851554.1	2665.34	0.774026	0.00298687	chorion peroxidase
XM_019912718.1	NW_017852312.1	797.206	0.77263	0.00211545	RE1-silencing transcription factor B-like
XM_019910020.1	NW_017852168.1	5213.65	0.772124	5.89e-05	26S proteasome non-ATPase regulatory subunit 4-like
XM_019899880.1	NW_017851724.1	343.952	0.77084	0.0082984	uncharacterized LOC109534281
XM_019898285.1	NW_017851382.1	8192.63	0.770045	0.000541347	carnitine O-palmitoyltransferase 1%2C liver isoform%2C transcript variant X1
XM_019903551.1	NW_017852030.1	2348.32	0.769429	0.00133001	macrophage migration inhibitory factor homolog
XM_019905259.1	NW_017852060.1	1230.51	0.767931	0.00155561	prostaglandin reductase 1-like
XM_019912292.1	NW_017852302.1	132.76	0.767208	0.00813452	pro-resilin-like%2C transcript variant X1
XM_019898920.1	NW_017851599.1	1163.32	0.766852	0.0032633	39S ribosomal protein L20%2C mitochondrial
XM_019916375.1	NW_017852381.1	126.009	0.766316	0.000203085	DNA helicase MCM9-like%2C transcript variant X1
XM_019910877.1	NW_017852247.1	2358.67	0.765729	0.000647326	glucose 1-dehydrogenase-like
XM_019911663.1	NW_017852286.1	1173.55	0.765498	0.000164959	translation factor GUF1 homolog%2C mitochondrial
XM_019907741.1	NW_017852104.1	1836.07	0.765156	6.83e-05	NADH dehydrogenase [ubiquinone] 1 beta subcomplex subunit 7
XM_019915684.1	NW_017852377.1	2208.78	0.764576	0.00900597	poly(U)-specific endoribonuclease homolog
XM_019905402.1	NW_017852064.1	208.851	0.763691	0.000162025	PI-PLC X domain-containing protein 3-like%2C transcript variant X1
XM_019899247.1	NW_017851651.1	5500.81	0.761347	0.00132142	glucose-6-phosphate 1-dehydrogenase%2C transcript variant X1
XM_019905103.1	NW_017852058.1	280.546	0.761045	0.000328595	zinc finger and BTB domain-containing protein 24-like%2C transcript variant X1
XM_019916148.1	NW_017852381.1	589.401	0.760014	0.00375946	myosin-10-like
XM_019915211.1	NW_017852369.1	214.782	0.759004	0.00488618	zinc transporter ZIP3-like%2C transcript variant X1
XM_019915523.1	NW_017852372.1	408.419	0.758049	0.000266013	mitochondrial import inner membrane translocase subunit Tim9-like
XR_002171740.1	NW_017851926.1	10986.6	0.757202	0.00739265	uncharacterized LOC109535649
XM_019913524.1	NW_017852339.1	3263.22	0.756651	1.33e-05	proteasome inhibitor PI31 subunit-like%2C transcript variant X1
XM_019911758.1	NW_017852296.1	380.577	0.756157	0.000136241	GDP-fucose protein O-fucosyltransferase 1%2C transcript variant X1
XM_019907107.1	NW_017852096.1	1375.25	0.755606	0.00016142	enoyl-CoA delta isomerase 2%2C mitochondrial
XM_019906710.1	NW_017852086.1	7080.81	0.754898	1.14e-06	cyclic AMP-dependent transcription factor ATF-1
XM_019917517.1	NW_017851160.1	756.838	0.754664	0.00348192	zinc finger and BTB domain-containing protein 24-like%2C transcript variant X1
XM_019907015.1	NW_017852096.1	678.624	0.75099	0.00374394	dnaJ homolog subfamily C member 22
XM_019916231.1	NW_017852381.1	1306.92	0.750021	0.000292995	uncharacterized LOC109545491
XM_019910868.1	NW_017852247.1	1025.69	0.749529	0.00481849	uncharacterized LOC109541875%2C transcript variant X1
XM_019913695.1	NW_017852342.1	2393.79	0.748953	1.06e-05	proteasome subunit beta type-2-like
XM_019902741.1	NW_017852013.1	702.033	0.748407	4.94e-05	protein SMG9%2C transcript variant X1
XM_019899756.1	NW_017851701.1	18410.4	0.748326	0.0055491	patatin-like phospholipase domain-containing protein 3%2C transcript variant X1
XM_019902972.1	NW_017852017.1	4105.53	0.747826	0.00016924	superoxide dismutase [Mn] 1%2C mitochondrial
XM_019910101.1	NW_017852173.1	1419.45	0.747047	0.00361853	WASH complex subunit FAM21%2C transcript variant X1
XM_019917954.1	NW_017851181.1	6370.96	0.745818	3.13e-05	proteasome subunit beta type-3
XM_019912597.1	NW_017849664.1	553.76	0.745543	0.00460523	alpha-N-acetylgalactosaminidase-like
XM_019902286.1	NW_017852003.1	924.061	0.745379	2.33e-05	threonylcarbamoyladenosine tRNA methylthiotransferase%2C transcript variant X1
XM_019900077.1	NW_017851724.1	927.386	0.744496	0.00787948	histone-lysine N-methyltransferase SMYD3-like
XM_019907701.1	NW_017852104.1	840.471	0.741883	0.000778933	centrobin%2C transcript variant X1
XM_019914468.1	NW_017852363.1	614.228	0.741439	0.00749518	myelin transcription factor 1
XM_019898823.1	NW_017851562.1	684.547	0.741063	0.00440626	alpha-N-acetylgalactosaminidase-like
XM_019904342.1	NW_017852038.1	2607.74	0.740127	0.00126277	uncharacterized LOC109537562
XM_019915181.1	NW_017852369.1	543.482	0.739337	2.95e-07	CWF19-like protein 2 homolog
XM_019901105.1	NW_017851824.1	592.197	0.73907	0.00476683	ABC transporter G family member 23-like
XM_019917905.1	NW_017851181.1	4712.76	0.738802	0.00255427	mevalonate kinase
XM_019914389.1	NW_017852359.1	463.543	0.738681	0.000219685	uncharacterized protein C19orf52-like
XM_019914524.1	NW_017852363.1	476.603	0.738087	6.96e-05	peptidyl-prolyl cis-trans isomerase H
XM_019914757.1	NW_017852366.1	3403.04	0.737905	0.00399276	atypical protein kinase C-like
XM_019900466.1	NW_017851775.1	1968.87	0.736683	5.91e-06	uncharacterized LOC109534711%2C transcript variant X1
XM_019908294.1	NW_017849039.1	627.454	0.735211	0.000407506	tetraspanin-7-like%2C transcript variant X1
XM_019901540.1	NW_017851923.1	24431.3	0.73383	2.15e-06	putative ATP-dependent RNA helicase me31b%2C transcript variant X1
XM_019903680.1	NW_017852030.1	591.639	0.732925	0.00748468	uncharacterized LOC109537108%2C transcript variant X1
XM_019913853.1	NW_017852348.1	2619.91	0.73205	0.00968614	polyadenylate-binding protein 4-like%2C transcript variant X1
XM_019911219.1	NW_017852263.1	1236.05	0.729946	0.00962034	voltage-dependent calcium channel subunit alpha-2/delta-3%2C transcript variant X1
XM_019913498.1	NW_017849823.1	358.222	0.729109	0.000792426	peroxisomal membrane protein PEX16-like
XM_019910150.1	NW_017852176.1	260.381	0.728499	0.00275979	uncharacterized LOC109541323%2C transcript variant X1
XM_019901676.1	NW_017851937.1	755.282	0.72527	1.96e-05	NADH dehydrogenase [ubiquinone] 1 alpha subcomplex assembly factor 3%2C transcript variant X1
XM_019901512.1	NW_017851914.1	1357.65	0.724477	0.0058834	anaphase-promoting complex subunit 4-like
XM_019910770.1	NW_017852245.1	902.407	0.723636	2.73e-06	uncharacterized LOC109541803%2C transcript variant X1
XM_019911828.1	NW_017852296.1	571.415	0.723603	0.0038671	protein phosphatase 1 regulatory subunit 12A%2C transcript variant X1
XM_019908045.1	NW_017852109.1	640.039	0.722733	0.00033349	DNA-directed RNA polymerase II subunit RPB7
XM_019900381.1	NW_017851760.1	1990.01	0.722622	4.12e-05	acyl-CoA dehydrogenase family member 9%2C mitochondrial
LOC109543376	NW_017849745.1	983.206	0.72183	0.000847311	none
XM_019907157.1	NW_017852099.1	612.422	0.721037	0.00487878	pro-interleukin-16-like%2C transcript variant X1
XM_019905992.1	NW_017852073.1	489.345	0.72065	8.87e-05	phosphatidylinositol N-acetylglucosaminyltransferase subunit C
XM_019897720.1	NW_017851231.1	449.562	0.72022	0.000375258	DNA mismatch repair protein Msh2-like
XM_019906315.1	NW_017852082.1	3294.24	0.719386	0.000958171	uncharacterized LOC109538888
XM_019916092.1	NW_017852381.1	710.506	0.718855	0.000263334	tRNA methyltransferase 10 homolog A%2C transcript variant X1
XM_019899473.1	NW_017846850.1	156.591	0.718838	0.000286498	zinc finger protein OZF-like
XM_019902926.1	NW_017852017.1	1534.02	0.718552	0.00817432	uncharacterized LOC109536629
XM_019908903.1	NW_017852126.1	6062.29	0.718502	0.000217297	ubiquitin carboxyl-terminal hydrolase 14
XM_019916706.1	NW_017850574.1	6450.36	0.717337	0.000105125	proteasome subunit alpha type-3-like
XM_019912158.1	NW_017852302.1	1241.65	0.717193	6.64e-05	modifier of mdg4-like%2C transcript variant X1
XM_019899395.1	NW_017851651.1	585.347	0.71543	0.000585583	mono [ADP-ribose] polymerase PARP16-like%2C transcript variant X1
XM_019902392.1	NW_017852012.1	902.24	0.715224	0.00614849	suppressor protein of bem1/bed5 double mutants-like
XM_019912798.1	NW_017845705.1	5527.08	0.714748	2.74e-05	26S protease regulatory subunit 6B-like
XM_019898746.1	NW_017851531.1	4005.78	0.714594	0.0087621	mesencephalic astrocyte-derived neurotrophic factor homolog
XM_019916026.1	NW_017852380.1	419.711	0.71354	0.00078862	M-phase phosphoprotein 6
XM_019916357.1	NW_017852381.1	362.271	0.712481	0.00126508	ultraviolet-B receptor UVR8%2C transcript variant X1
XM_019913362.1	NW_017852336.1	76.7134	0.712472	0.00468859	zinc finger MYND domain-containing protein 10
XM_019916676.1	NW_017850513.1	10893.8	0.712191	0.000178414	26S protease regulatory subunit 6B-like
XM_019903834.1	NW_017848150.1	1600.2	0.711338	0.00730441	anaphase-promoting complex subunit 4-like
XM_019900254.1	NW_017851737.1	279.827	0.71118	0.00185929	tRNA-specific adenosine deaminase 1%2C transcript variant X1
XM_019899803.1	NW_017851710.1	11730	0.710876	0.000244875	26S protease regulatory subunit 6B
XM_019917900.1	NW_017851181.1	1135.3	0.710764	0.0075585	dolichyl pyrophosphate Man9GlcNAc2 alpha-1%2C3-glucosyltransferase
XM_019899382.1	NW_017851651.1	1071.19	0.710677	0.000275983	putative GTP-binding protein 6%2C transcript variant X1
XM_019905117.1	NW_017852058.1	45.4945	0.710533	0.00651504	zinc finger protein 525-like
XM_019904715.1	NW_017852055.1	1213.05	0.710115	0.000598948	uncharacterized LOC109537816%2C transcript variant X1
XM_019902543.1	NW_017852012.1	3725.47	0.709631	1.31e-05	NSFL1 cofactor p47
XM_019912726.1	NW_017852312.1	710.778	0.709379	0.00134317	Y+L amino acid transporter 2%2C transcript variant X1
XM_019901069.1	NW_017851824.1	2314.39	0.707043	0.00995437	organic cation transporter protein%2C transcript variant X1
XM_019902097.1	NW_017851993.1	2155.74	0.706918	0.00328604	serine/threonine-protein kinase polo%2C transcript variant X1
XM_019899759.1	NW_017851701.1	1785.19	0.706803	0.000257066	peroxisomal membrane protein PEX16-like
XM_019905407.1	NW_017852064.1	8648.13	0.706148	1.38e-05	GMP synthase [glutamine-hydrolyzing]%2C transcript variant X1
XM_019906786.1	NW_017852091.1	710.84	0.706019	0.00325025	uncharacterized LOC109539177%2C transcript variant X1
XM_019900339.1	NW_017851755.1	6801.96	0.705637	0.000113203	proteasome subunit alpha type-3
XM_019912407.1	NW_017852305.1	1860.99	0.705471	0.001	UBA-like domain-containing protein 2
XM_019899663.1	NW_017851694.1	1326.36	0.704515	1.19e-06	39S ribosomal protein L37%2C mitochondrial
XM_019900064.1	NW_017851724.1	1285.05	0.703684	0.0076767	protein abnormal spindle-like
XM_019910922.1	NW_017852254.1	837.714	0.701582	0.00224119	protein MMS22-like
XM_019899743.1	NW_017851699.1	1089.74	0.701205	0.000336688	angiotensin-converting enzyme-like
XM_019902403.1	NW_017852012.1	232.472	0.7012	0.00157683	uncharacterized LOC109536268%2C transcript variant X1
XM_019917555.1	NW_017851162.1	1346.46	0.701092	8.76e-06	U3 small nucleolar RNA-associated protein 4 homolog%2C transcript variant X1
XM_019898590.1	NW_017851487.1	1521.23	0.701001	1.92e-05	protein KIAA0100
XM_019901353.1	NW_017851863.1	1699.5	0.70016	0.0033195	UDP-glucuronosyltransferase 1-9-like%2C transcript variant X1
XM_019910688.1	NW_017852245.1	12674.4	0.700033	0.00185799	ATP synthase subunit d%2C mitochondrial
XM_019906393.1	NW_017852083.1	4775.09	0.700033	0.00567819	probable methylthioribulose-1-phosphate dehydratase
XM_019901208.1	NW_017851842.1	473.353	0.699293	0.000636627	tetraspanin-7-like
XM_019912349.1	NW_017852302.1	2217.04	0.699268	0.00886505	GPI mannosyltransferase 3
XM_019900137.1	NW_017851737.1	1249.83	0.698857	0.00156861	methyltransferase-like protein 17%2C mitochondrial
XM_019908658.1	NW_017852117.1	1070.25	0.698574	0.00778221	G2/mitotic-specific cyclin-B3%2C transcript variant X1
XM_019907496.1	NW_017848934.1	790.894	0.697925	0.000958171	39S ribosomal protein L14%2C mitochondrial
XM_019900363.1	NW_017851758.1	2212.68	0.697615	2.64e-14	cystathionine beta-synthase%2C transcript variant X1
XM_019915353.1	NW_017852370.1	1519.1	0.692775	0.00380618	uncharacterized LOC109544931%2C transcript variant X1
XM_019901386.1	NW_017851876.1	446.202	0.692758	4.23e-05	centrosomal protein of 135 kDa-like
XM_019911961.1	NW_017852300.1	15312.1	0.691754	0.000126876	UTP--glucose-1-phosphate uridylyltransferase%2C transcript variant X1
XM_019908219.1	NW_017852110.1	2132.81	0.691275	0.00747014	citron Rho-interacting kinase-like%2C transcript variant X1
XM_019905089.1	NW_017852058.1	44.01	0.690942	0.00651454	zinc finger protein 883-like
XM_019917741.1	NW_017851174.1	1894.4	0.690813	8.39e-06	cytochrome P450 302a1%2C mitochondrial-like
XM_019915491.1	NW_017852371.1	611.56	0.690742	0.00292988	NADPH oxidase 5%2C transcript variant X1
XM_019909504.1	NW_017852166.1	7010.23	0.688914	0.00815634	ATPase inhibitor%2C mitochondrial-like
XM_019908696.1	NW_017852117.1	1402.48	0.688738	0.000290107	elongation factor Ts%2C mitochondrial
XM_019906965.1	NW_017852093.1	991.016	0.68848	0.000549336	collagen alpha chain CG42342-like%2C transcript variant X1
XM_019914777.1	NW_017852366.1	1193.64	0.685099	0.00096006	probable 28S ribosomal protein S23%2C mitochondrial
XM_019899542.1	NW_017851680.1	522.074	0.684366	1.54e-05	tryptophan--tRNA ligase%2C mitochondrial
XM_019902701.1	NW_017852012.1	8095.08	0.683255	0.000219525	proteasome subunit alpha type-5%2C transcript variant X1
XM_019902624.1	NW_017852012.1	416.684	0.68268	1.09e-05	dnaJ homolog subfamily C member 17
XM_019911980.1	NW_017852300.1	448.989	0.682357	2.17e-06	cyclin-H
XM_019902339.1	NW_017852009.1	887.887	0.682011	1.55e-05	uncharacterized LOC109536224
XM_019903917.1	NW_017852037.1	1642.73	0.681955	0.00117278	uncharacterized LOC109537282%2C transcript variant X1
XM_019909756.1	NW_017852166.1	1707.48	0.67904	0.00524728	rho GTPase-activating protein 7%2C transcript variant X1
XM_019912643.1	NW_017852311.1	491.187	0.678878	0.00970362	collagen alpha-1(XI) chain-like
XM_019903417.1	NW_017852028.1	500.225	0.678619	1.05e-06	deoxyhypusine hydroxylase
XM_019912227.1	NW_017852302.1	674.393	0.678383	0.000958171	cytochrome c oxidase assembly protein COX15 homolog%2C transcript variant X1
XM_019914315.1	NW_017852358.1	1746.93	0.678145	1.96e-06	serine/threonine-protein phosphatase Pgam5%2C mitochondrial-like%2C transcript variant X1
XM_019899680.1	NW_017845118.1	100.129	0.677127	0.00579566	tubulin epsilon chain-like
XM_019916221.1	NW_017852381.1	1684.85	0.676239	7.79e-07	histone RNA hairpin-binding protein
XM_019913216.1	NW_017852329.1	9519.95	0.675424	0.00995541	fatty acid-binding protein%2C liver
XM_019899744.1	NW_017851699.1	763.16	0.67473	0.00156365	angiotensin-converting enzyme-like
XM_019915318.1	NW_017852369.1	586.054	0.6745	0.00725142	otoferlin-like
XM_019917419.1	NW_017851153.1	772.252	0.674102	0.00174019	cap-specific mRNA (nucleoside-2'-O-)-methyltransferase 1%2C transcript variant X1
XM_019897741.1	NW_017851239.1	1052.09	0.672502	0.00416482	metaxin-2-like
XR_002172257.1	NW_017852162.1	84.2911	0.671863	0.00903864	uncharacterized LOC109540833
XM_019917297.1	NW_017851136.1	1065.24	0.671536	0.000136241	cleavage and polyadenylation specificity factor subunit 1%2C transcript variant X1
XM_019910883.1	NW_017852247.1	3878.52	0.667771	0.000600142	NADH dehydrogenase [ubiquinone] 1 beta subcomplex subunit 2%2C mitochondrial-like
XM_019907371.1	NW_017852103.1	127.262	0.667399	0.00932073	glycoprotein-N-acetylgalactosamine 3-beta-galactosyltransferase 1-like
XM_019910119.1	NW_017852173.1	654.047	0.667183	0.00552002	spindle assembly abnormal protein 6 homolog
XM_019908977.1	NW_017849169.1	9061.07	0.666111	0.0036009	ATP-dependent RNA helicase p62-like
XM_019908459.1	NW_017849053.1	145.228	0.665849	0.0080638	thymidylate synthase-like
XM_019903924.1	NW_017852037.1	943.707	0.665591	0.00026133	mitochondrial ribosome-associated GTPase 2
XM_019912842.1	NW_017852313.1	4355.15	0.665261	0.000721637	putative tricarboxylate transport protein%2C mitochondrial%2C transcript variant X1
XM_019907944.1	NW_017852107.1	325.219	0.66494	0.00127485	SUN domain-containing protein 1-like%2C transcript variant X1
XM_019900228.1	NW_017851737.1	914.411	0.663745	0.000606308	small ubiquitin-related modifier 3-like
XM_019904612.1	NW_017852049.1	3129.56	0.662875	0.00444813	dnaJ homolog subfamily C member 8
XM_019911910.1	NW_017852300.1	305.65	0.662812	0.00108887	iron-sulfur cluster assembly 2 homolog%2C mitochondrial
XM_019917381.1	NW_017851142.1	761.516	0.662657	4.11e-08	uncharacterized LOC109546422
XM_019915047.1	NW_017852368.1	460.695	0.662491	0.000221957	origin recognition complex subunit 3
XM_019902535.1	NW_017852012.1	2765.74	0.661739	0.00725841	protein tyrosine phosphatase type IVA 3-like%2C transcript variant X1
XM_019910078.1	NW_017852173.1	5052.39	0.661362	0.00273113	protein NipSnap
XM_019911690.1	NW_017852287.1	385.009	0.661094	0.00517438	origin recognition complex subunit 4%2C transcript variant X1
XM_019898017.1	NW_017851282.1	3592.82	0.660553	0.00130075	5'-nucleotidase domain-containing protein 3%2C transcript variant X1
XM_019910019.1	NW_017852168.1	3081.19	0.659729	0.00125367	angiotensin-converting enzyme-like
XM_019915367.1	NW_017852371.1	1716.3	0.659025	0.00302122	nucleoprotein TPR-like
XM_019917240.1	NW_017851122.1	808.459	0.658722	0.000466969	WD repeat-containing protein 46
XM_019910956.1	NW_017852254.1	952.709	0.658651	0.00418698	ubiquinone biosynthesis protein COQ9%2C mitochondrial
XM_019902961.1	NW_017852017.1	689.957	0.656801	0.000206152	caseinolytic peptidase B protein homolog%2C transcript variant X1
XM_019916435.1	NW_017852382.1	580.747	0.655086	0.000556286	glycosaminoglycan xylosylkinase homolog%2C transcript variant X1
XM_019908681.1	NW_017852117.1	8713.73	0.654257	0.000938401	proteasome subunit alpha type-7-1
XM_019911056.1	NW_017849455.1	1800.43	0.654094	0.00218675	probable nucleoporin Nup58
XM_019900063.1	NW_017851724.1	1381.87	0.653458	3.61e-05	transmembrane protein 70 homolog%2C mitochondrial
XM_019915776.1	NW_017850281.1	6559.12	0.653394	0.00463797	ATP-dependent RNA helicase p62-like
XM_019917541.1	NW_017851160.1	899.08	0.653073	0.00054467	5-methylcytosine rRNA methyltransferase NSUN4
XM_019917975.1	NW_017851181.1	969.552	0.652382	0.00987227	insulin-like growth factor-binding protein complex acid labile subunit
XM_019907028.1	NW_017852096.1	841.036	0.651841	0.000523689	28S ribosomal protein S9%2C mitochondrial
XM_019902304.1	NW_017852003.1	712.861	0.651541	0.00100179	DNA-directed RNA polymerase III subunit RPC8
XM_019909039.1	NW_017852128.1	678.415	0.651132	0.00234573	peroxiredoxin-6
XM_019912325.1	NW_017852302.1	1834.68	0.650563	0.00360933	protein prenyltransferase alpha subunit repeat-containing protein 1
XM_019911179.1	NW_017852263.1	1673.64	0.650503	0.000445421	facilitated trehalose transporter Tret1-like%2C transcript variant X1
XM_019898321.1	NW_017851382.1	498.371	0.6503	0.00876712	uncharacterized LOC109533091%2C transcript variant X1
XR_002172064.1	NW_017852077.1	1054.69	0.650235	0.00637787	uncharacterized LOC109538796
XM_019900285.1	NW_017851743.1	800.425	0.648484	0.0095168	gephyrin%2C transcript variant X1
XM_019908534.1	NW_017852116.1	9369.42	0.648474	0.00726402	putative ATP synthase subunit f%2C mitochondrial
XM_019904673.1	NW_017852052.1	746.442	0.64809	0.00264937	polycomb group protein Psc-like
XM_019916860.1	NW_017850846.1	532.087	0.64797	4.27e-05	uncharacterized LOC109546024
XM_019902079.1	NW_017851987.1	138.673	0.647588	0.00444813	protein timeless homolog
XM_019900746.1	NW_017851813.1	1810.35	0.647212	0.00236891	probable nucleoporin Nup58%2C transcript variant X1
XM_019912733.1	NW_017852312.1	445.013	0.645037	0.00402796	poly [ADP-ribose] polymerase 14-like
XM_019909046.1	NW_017852128.1	845.186	0.642408	0.00177935	mitochondrial GTPase 1
XM_019904734.1	NW_017852055.1	780.539	0.641121	1.55e-05	erlin-1-like
XM_019903258.1	NW_017847967.1	2441.15	0.63916	0.00589902	acetyl-CoA acetyltransferase%2C mitochondrial-like
XM_019912339.1	NW_017852302.1	617.356	0.63824	0.000227935	integrator complex subunit 10
XM_019918053.1	NW_017851187.1	840.115	0.636858	0.000263334	probable 28S ribosomal protein S16%2C mitochondrial
XM_019910213.1	NW_017852179.1	599.717	0.636732	0.000960493	disheveled-associated activator of morphogenesis 1
XM_019898424.1	NW_017851422.1	1387.95	0.636489	0.00934302	probable 39S ribosomal protein L49%2C mitochondrial%2C transcript variant X1
XM_019899775.1	NW_017851704.1	457.846	0.636353	0.00279737	protein PET100 homolog%2C mitochondrial
XM_019916255.1	NW_017852381.1	1000.62	0.636186	5.58e-05	quinone oxidoreductase-like protein 2 homolog
XM_019909038.1	NW_017845588.1	4502.37	0.63503	0.0019206	acetyl-CoA acetyltransferase%2C mitochondrial-like
XM_019907264.1	NW_017852100.1	8298.22	0.633951	0.00903804	proteasome subunit alpha type-1
XR_002171602.1	NW_017851697.1	467.174	0.633731	2.03e-05	uncharacterized LOC109534166
XM_019915072.1	NW_017852369.1	6711.46	0.633592	0.00316385	ATP-dependent RNA helicase DHX36-like%2C transcript variant X1
XM_019909299.1	NW_017852160.1	468.795	0.631672	0.00856463	germinal-center associated nuclear protein%2C transcript variant X1
XM_019911389.1	NW_017852267.1	1053.37	0.630303	0.00902682	zinc finger homeobox protein 3
XM_019898493.1	NW_017851445.1	777.899	0.630128	4.06e-05	translation initiation factor eIF-2B subunit epsilon%2C transcript variant X1
XM_019915502.1	NW_017852371.1	1716.24	0.629224	0.000630993	UPF0160 protein
XM_019918175.1	NW_017851204.1	27553.5	0.629219	0.000213515	calmodulin
XM_019908968.1	NW_017852126.1	455.377	0.628945	0.00329088	glutathione S-transferase 1-like
XM_019912672.1	NW_017852312.1	292.587	0.628084	0.000820681	ankyrin repeat%2C SAM and basic leucine zipper domain-containing protein 1
XM_019903374.1	NW_017852028.1	539.582	0.62743	0.000570945	target of rapamycin complex subunit lst8%2C transcript variant X1
XM_019905728.1	NW_017852070.1	1233.38	0.627381	0.00747014	lysoplasmalogenase-like protein TMEM86A
XM_019914763.1	NW_017852366.1	2485.22	0.627304	0.00010304	ribosomal L1 domain-containing protein 1-like
XM_019903151.1	NW_017852021.1	383.295	0.626938	0.000266121	enoyl-CoA hydratase domain-containing protein 3%2C mitochondrial%2C transcript variant X1
XM_019908728.1	NW_017852118.1	289.763	0.626915	0.00108688	5-demethoxyubiquinone hydroxylase%2C mitochondrial%2C transcript variant X1
XM_019911320.1	NW_017852265.1	401.6	0.626746	0.00675384	deoxynucleoside kinase-like
XM_019901398.1	NW_017851876.1	2327.87	0.626583	0.00085347	zinc finger CCCH domain-containing protein 11A-like
XM_019911204.1	NW_017852263.1	916.561	0.626018	5.18e-05	uncharacterized LOC109542133%2C transcript variant X1
XM_019905085.1	NW_017852058.1	115.316	0.625876	0.000938095	zinc finger protein 268-like
XM_019905074.1	NW_017852056.1	325.053	0.624576	0.00134188	protein RRNAD1-like
XM_019907538.1	NW_017852103.1	1879.71	0.624214	0.0024971	cytochrome c-type heme lyase
XM_019910795.1	NW_017852245.1	1556.72	0.62413	0.000226194	retinol dehydrogenase 11-like
XM_019898596.1	NW_017851487.1	1260.38	0.623756	8.59e-06	RINT1-like protein%2C transcript variant X1
XM_019914201.1	NW_017852355.1	337.464	0.623263	0.00128074	DNA polymerase epsilon subunit 2
XM_019912032.1	NW_017852300.1	484.22	0.622738	0.00959891	LYR motif-containing protein 4
XM_019905154.1	NW_017852058.1	3376	0.622418	0.009837	uncharacterized LOC109538092%2C transcript variant X1
XM_019905090.1	NW_017852058.1	205.422	0.622173	8.22e-05	zinc finger protein 37-like
XM_019899508.1	NW_017851672.1	9950.11	0.621951	0.00833372	synaptic vesicle glycoprotein 2C-like
XM_019911762.1	NW_017852296.1	3101.86	0.62133	0.00737032	probable NADH dehydrogenase [ubiquinone] iron-sulfur protein 6%2C mitochondrial
XM_019905116.1	NW_017852058.1	93.563	0.620818	0.000497816	oocyte zinc finger protein XlCOF19-like
XM_019904671.1	NW_017852052.1	1279.97	0.620121	4.63e-06	116 kDa U5 small nuclear ribonucleoprotein component
XM_019909491.1	NW_017852166.1	2561.98	0.619045	0.00560535	SWI/SNF complex subunit SMARCC2-like%2C transcript variant X1
XM_019918262.1	NW_017851223.1	600.689	0.618955	0.000168276	lysine-specific histone demethylase 1A%2C transcript variant X1
XM_019903366.1	NW_017852028.1	8732.75	0.61801	0.00167149	protein gustavus%2C transcript variant X1
XM_019912358.1	NW_017852302.1	409.139	0.616481	0.00893982	U7 snRNA-associated Sm-like protein LSm11
XM_019903501.1	NW_017852030.1	9088.9	0.61564	0.00512171	phosphoglucomutase
XM_019910678.1	NW_017852245.1	9580.52	0.613033	0.00116172	cytochrome c oxidase subunit 6B
XM_019906460.1	NW_017852083.1	560.517	0.61238	0.00444431	tRNA (cytosine-5-)-methyltransferase%2C transcript variant X1
XM_019905137.1	NW_017852058.1	1917.35	0.612224	0.00172546	ATP synthase subunit s-like protein
XM_019909092.1	NW_017852128.1	963.929	0.608495	0.000505785	mitochondrial tRNA-specific 2-thiouridylase 1%2C transcript variant X1
XM_019915763.1	NW_017852380.1	294.24	0.607994	0.00512157	dimethyladenosine transferase 2%2C mitochondrial
XM_019899815.1	NW_017851713.1	1767	0.607731	0.000636627	probable phosphorylase b kinase regulatory subunit beta%2C transcript variant X1
XM_019907330.1	NW_017852103.1	1282.43	0.607091	0.00449821	uncharacterized LOC109539537%2C transcript variant X1
XM_019905672.1	NW_017852068.1	701.542	0.606429	0.000166109	peptidyl-prolyl cis-trans isomerase-like 3%2C transcript variant X1
XM_019915239.1	NW_017852369.1	4608.05	0.60561	0.000634421	porphobilinogen deaminase%2C transcript variant X1
XM_019917349.1	NW_017851139.1	829.448	0.604252	0.00190752	1%2C2-dihydroxy-3-keto-5-methylthiopentene dioxygenase-like
XM_019905920.1	NW_017852073.1	470.299	0.60368	2.09e-05	uncharacterized LOC109538607
XM_019912620.1	NW_017852309.1	1937.95	0.603097	1.5e-06	uncharacterized LOC109543091%2C transcript variant X1
XM_019914731.1	NW_017852366.1	783.5	0.60279	0.00140974	gastrula zinc finger protein XlCGF49.1-like
XM_019911210.1	NW_017852263.1	753.246	0.60277	0.000999511	protein FAM173B%2C transcript variant X1
XM_019914046.1	NW_017852350.1	621.518	0.60261	0.0050832	nitrogen permease regulator 3-like protein
XM_019915663.1	NW_017852377.1	994.036	0.601542	0.00454864	uncharacterized LOC109545149%2C transcript variant X1
XM_019914688.1	NW_017852366.1	4572.85	0.599881	0.00105018	WD repeat domain phosphoinositide-interacting protein 2-like%2C transcript variant X1
XM_019910777.1	NW_017852245.1	565.81	0.599297	0.000320017	uncharacterized LOC109541809%2C transcript variant X1
XM_019901577.1	NW_017851926.1	2196.2	0.599065	0.00740145	sphingomyelin phosphodiesterase-like
XM_019910962.1	NW_017852254.1	455.751	0.598495	0.000334665	V-type proton ATPase 21 kDa proteolipid subunit%2C transcript variant X1
XM_019914360.1	NW_017852358.1	389.604	0.598348	0.0010884	ankyrin repeat domain-containing protein 49-like%2C transcript variant X1
XM_019908755.1	NW_017852121.1	1368.01	0.597304	1.87e-05	39S ribosomal protein L19%2C mitochondrial
XM_019918174.1	NW_017851204.1	761.816	0.597141	0.000119789	cytochrome c oxidase assembly factor 5
XM_019908687.1	NW_017852117.1	14484.9	0.597029	0.00888537	uncharacterized LOC109540339%2C transcript variant X1
XM_019905739.1	NW_017852071.1	1147.35	0.596931	0.000735992	tail-anchored protein insertion receptor WRB-like
XM_019905971.1	NW_017852073.1	478.332	0.593157	0.00122135	WD repeat domain-containing protein 83
XM_019909991.1	NW_017852168.1	146.561	0.59246	0.00109558	probable oligoribonuclease
XM_019912572.1	NW_017852305.1	3356.88	0.592152	0.00784827	uncharacterized LOC109543051
XM_019897721.1	NW_017851231.1	934.362	0.589712	6.03e-07	leucine--tRNA ligase%2C cytoplasmic
XM_019908018.1	NW_017852108.1	1407.86	0.58885	0.00180409	U1 small nuclear ribonucleoprotein A
XM_019911640.1	NW_017852279.1	675.197	0.588405	8.64e-05	uncharacterized LOC109542416%2C transcript variant X1
XM_019898914.1	NW_017851599.1	2166.94	0.587388	0.00292364	28S ribosomal protein S11%2C mitochondrial
XM_019906546.1	NW_017852085.1	2069.33	0.587337	0.000180398	NFX1-type zinc finger-containing protein 1-like
XM_019901455.1	NW_017851898.1	707.867	0.587268	0.00730101	neuferricin
XM_019901475.1	NW_017851907.1	2647.98	0.587058	0.000156189	replication protein A 70 kDa DNA-binding subunit-like
XM_019911269.1	NW_017852263.1	366.143	0.58701	0.00104953	DNA repair and recombination protein RAD54-like
XM_019907510.1	NW_017852103.1	2117.88	0.585818	0.00349741	peroxisomal membrane protein 2
XM_019916228.1	NW_017852381.1	839.62	0.58509	0.000106835	tRNA-splicing ligase RtcB homolog
XM_019907053.1	NW_017852096.1	528.105	0.584402	0.00474634	RNA-binding protein 40
XM_019914505.1	NW_017852363.1	451.015	0.583013	0.0037888	ribonuclease P/MRP protein subunit POP5%2C transcript variant X1
XM_019911532.1	NW_017852270.1	609.874	0.582693	0.00219507	pre-mRNA-splicing factor 38
XM_019911126.1	NW_017852258.1	822.026	0.582286	0.00586253	nuclear transcription factor Y subunit B-1%2C transcript variant X1
XM_019913607.1	NW_017852340.1	9155.62	0.581012	0.00354846	UV excision repair protein RAD23 homolog B-like
XM_019908015.1	NW_017852108.1	875.176	0.580829	3.98e-05	ATP-dependent RNA helicase abstrakt
XM_019898035.1	NW_017851282.1	1079.44	0.580638	0.00392265	neurofibromin%2C transcript variant X1
XM_019902243.1	NW_017852003.1	668.909	0.579717	0.0010322	anaphase-promoting complex subunit 2
XM_019916173.1	NW_017852381.1	6252.43	0.579676	0.00129453	upstream activation factor subunit spp27
XM_019912330.1	NW_017852302.1	1829.87	0.579378	1.35e-05	glutaredoxin-3
XM_019901545.1	NW_017851923.1	4532.38	0.579218	0.00775458	triosephosphate isomerase%2C transcript variant X1
XM_019916250.1	NW_017852381.1	889.276	0.57906	0.00129966	probable receptor-like protein kinase At5g18500
XM_019916668.1	NW_017850500.1	3268.83	0.578429	0.000110399	eukaryotic translation initiation factor 3 subunit K-like
XM_019907032.1	NW_017852096.1	862.861	0.577825	0.00139582	50S ribosomal protein L27
XM_019914923.1	NW_017852366.1	439.065	0.577032	2.43e-05	cytosolic endo-beta-N-acetylglucosaminidase
XM_019905817.1	NW_017852073.1	16024	0.576977	0.00957618	succinate--CoA ligase [ADP-forming] subunit beta%2C mitochondrial%2C transcript variant X1
XM_019914335.1	NW_017852358.1	296.711	0.5764	0.00120864	uncharacterized protein KIAA1841
XM_019915931.1	NW_017852380.1	1209.74	0.575066	0.00527313	peptidyl-tRNA hydrolase ICT1%2C mitochondrial
XM_019913680.1	NW_017852342.1	643.24	0.574805	0.000216883	exosome complex component RRP46
XM_019904030.1	NW_017852037.1	450.054	0.573429	9.81e-05	phosphatidate cytidylyltransferase%2C mitochondrial
XM_019914229.1	NW_017852355.1	7890.41	0.573339	0.00442855	proteasome subunit beta type-5
XM_019900503.1	NW_017851775.1	966.622	0.573148	3.09e-05	probable dimethyladenosine transferase
XM_019902692.1	NW_017852012.1	534.718	0.572573	0.000892793	serine/threonine-protein kinase VRK1-like
XM_019901974.1	NW_017851955.1	1053.26	0.572376	0.000147915	TELO2-interacting protein 1 homolog
XM_019900300.1	NW_017851749.1	2405.32	0.571322	8.75e-05	eukaryotic translation initiation factor 3 subunit K-like
XM_019913050.1	NW_017852326.1	2435.18	0.571163	3.63e-05	mitochondrial inner membrane protein OXA1L%2C transcript variant X1
XM_019906402.1	NW_017852083.1	793.746	0.571081	0.00224119	protein CutA homolog
XM_019914955.1	NW_017852366.1	1960.87	0.571066	0.000525148	transcription factor A%2C mitochondrial-like
XM_019915210.1	NW_017852369.1	2469.44	0.571038	2.72e-05	uncharacterized LOC109544841
XM_019903148.1	NW_017852021.1	6650.34	0.569509	0.00287794	26S proteasome non-ATPase regulatory subunit 14
XM_019901306.1	NW_017851859.1	6575.79	0.568248	0.000754762	pyruvate dehydrogenase E1 component subunit alpha%2C mitochondrial-like%2C transcript variant X1
XM_019912109.1	NW_017852301.1	1161.25	0.568197	0.00627508	pre-rRNA-processing protein ESF2-like
XM_019905108.1	NW_017852058.1	279.078	0.567977	8.13e-05	zinc finger protein 182-like
XM_019914913.1	NW_017852366.1	6525.04	0.567542	4.03e-05	eukaryotic translation initiation factor 3 subunit D%2C transcript variant X1
XM_019913911.1	NW_017852348.1	6010.81	0.567109	0.00460698	phosphoserine phosphatase
XM_019915117.1	NW_017852369.1	2648.75	0.567034	0.00903864	NHP2-like protein 1 homolog
XM_019911482.1	NW_017852269.1	405.041	0.566573	0.00221234	mitochondrial inner membrane protease ATP23 homolog
XM_019917858.1	NW_017851174.1	1783.35	0.565949	0.00103752	FACT complex subunit Ssrp1
XM_019912911.1	NW_017852320.1	1613.08	0.565706	0.00112824	uncharacterized LOC109543289%2C transcript variant X1
XM_019899241.1	NW_017851651.1	3107.35	0.565404	0.00083799	uroporphyrinogen decarboxylase
XM_019916272.1	NW_017852381.1	2643.37	0.565383	0.00291752	peroxiredoxin-2-like
XM_019907502.1	NW_017852103.1	1518.67	0.565144	0.00403617	malectin
XM_019913935.1	NW_017852348.1	282.637	0.564056	0.00417593	uncharacterized LOC109543974
XM_019910945.1	NW_017852254.1	9135.8	0.563797	0.00340278	26S protease regulatory subunit 10B
XM_019900097.1	NW_017851729.1	898.561	0.563541	0.000325395	TELO2-interacting protein 1 homolog%2C transcript variant X1
XM_019911195.1	NW_017852263.1	4749.19	0.562026	0.00417593	NADH-ubiquinone oxidoreductase 49 kDa subunit
LOC109535022	NW_017847275.1	100.11	0.561971	0.00387653	none
XM_019901251.1	NW_017851850.1	12625.7	0.561307	0.00395449	bacchus-like%2C transcript variant X1
XM_019906597.1	NW_017848860.1	670.679	0.561009	0.0071176	ATP-binding cassette sub-family G member 4-like
XM_019901944.1	NW_017851949.1	291.705	0.560977	0.00721369	probable RNA helicase armi
XM_019903951.1	NW_017852037.1	2933.11	0.5603	6.32e-05	28S ribosomal protein S15%2C mitochondrial
XM_019907802.1	NW_017852106.1	1354.57	0.559275	2.78e-07	RING finger protein 37
XM_019914630.1	NW_017852366.1	399.322	0.559187	0.0024817	ADP-ribose pyrophosphatase%2C mitochondrial%2C transcript variant X1
XM_019899393.1	NW_017851651.1	4000.81	0.558799	0.00180134	cytochrome c oxidase subunit 5A%2C mitochondrial-like
XM_019899118.1	NW_017851637.1	2078.03	0.558458	1.37e-05	vacuolar ATPase assembly integral membrane protein VMA21 homolog
XM_019918018.1	NW_017851185.1	343.625	0.558286	0.00304678	uncharacterized LOC109546865
XM_019902736.1	NW_017852013.1	5694.93	0.558081	0.00425346	NADH dehydrogenase [ubiquinone] 1 alpha subcomplex subunit 10%2C mitochondrial
XM_019906347.1	NW_017852082.1	1166.99	0.557172	0.00364949	28S ribosomal protein S31%2C mitochondrial
XM_019905688.1	NW_017852068.1	1447.17	0.556931	2.14e-05	probable ATP-dependent RNA helicase YTHDC2%2C transcript variant X1
XM_019912473.1	NW_017852305.1	4573.81	0.555706	0.00271172	NADH dehydrogenase [ubiquinone] iron-sulfur protein 8%2C mitochondrial
XM_019917490.1	NW_017851159.1	585.307	0.554615	0.000780419	rhomboid-related protein 2
XM_019898395.1	NW_017851403.1	1059.26	0.554522	0.00717049	uncharacterized LOC109533145%2C transcript variant X1
XM_019917996.1	NW_017851181.1	1148.19	0.554371	0.00203045	tubulin gamma-1 chain-like
XM_019911244.1	NW_017852263.1	11715	0.553985	0.00815699	eukaryotic translation initiation factor 4E transporter-like%2C transcript variant X1
XM_019915304.1	NW_017852369.1	2299.45	0.552918	0.000820309	uridine 5'-monophosphate synthase%2C transcript variant X1
XM_019913676.1	NW_017852342.1	796.52	0.552115	2.03e-05	BRCA1-associated RING domain protein 1-like
XM_019898464.1	NW_017851439.1	633.314	0.551336	0.00182818	protein arginine N-methyltransferase 5
XM_019909709.1	NW_017852166.1	1284.88	0.54999	0.00962034	uncharacterized LOC109541038
XM_019907919.1	NW_017852107.1	267.86	0.549826	0.00217738	zinc finger protein 501-like%2C transcript variant X1
XM_019899568.1	NW_017845104.1	373.781	0.54916	0.00419385	deoxycytidylate deaminase
XM_019914093.1	NW_017852350.1	751.04	0.548655	0.000341029	WW domain-containing oxidoreductase
XM_019911631.1	NW_017852279.1	1363.09	0.547301	0.00325025	nuclear pore complex protein Nup93-like
XM_019901718.1	NW_017851937.1	874.212	0.546889	0.00130075	GPI transamidase component PIG-T
XM_019910180.1	NW_017852178.1	1925.68	0.545946	0.00617727	protein PTCD3 homolog%2C mitochondrial
XM_019905621.1	NW_017852067.1	541.174	0.545256	0.000414654	translation initiation factor IF-3%2C mitochondrial
XM_019914189.1	NW_017852355.1	8683.94	0.544772	7.79e-05	influenza virus NS1A-binding protein homolog%2C transcript variant X1
XM_019905467.1	NW_017852064.1	5420.71	0.544595	0.00752244	acyl carrier protein%2C mitochondrial%2C transcript variant X1
XM_019916810.1	NW_017850761.1	2369.65	0.544506	0.00078862	eukaryotic translation initiation factor 3 subunit K-like
XM_019900516.1	NW_017851775.1	966.923	0.543455	0.00398183	rRNA methyltransferase 3%2C mitochondrial
XM_019905111.1	NW_017852058.1	274.684	0.543173	0.000138023	zinc finger protein OZF-like
XM_019900299.1	NW_017851748.1	625.502	0.543037	0.00932838	PCI domain-containing protein 2 homolog
XM_019897834.1	NW_017851249.1	2810.96	0.542247	0.00644656	cathepsin O-like
XM_019917231.1	NW_017851115.1	321.415	0.541298	0.00889536	F-box/SPRY domain-containing protein 1
XM_019914138.1	NW_017852350.1	846.776	0.541229	1.42e-05	nuclear pore complex protein Nup88
XM_019902676.1	NW_017852012.1	671.991	0.540977	0.00215685	vesicle transport protein USE1
XM_019915408.1	NW_017852371.1	2377.88	0.540773	0.000217297	tryptophan--tRNA ligase%2C cytoplasmic
XM_019914985.1	NW_017852366.1	1294.89	0.540106	0.00224119	probable trans-2-enoyl-CoA reductase%2C mitochondrial
XM_019899389.1	NW_017851651.1	982.888	0.539503	0.00526247	ralA-binding protein 1
XM_019917321.1	NW_017851136.1	1370.21	0.539474	0.000978701	OCIA domain-containing protein 1
XM_019898592.1	NW_017851487.1	1742.87	0.539337	0.000122802	uncharacterized LOC109533306
XM_019911731.1	NW_017852290.1	486.262	0.539307	0.00200183	histidine triad nucleotide-binding protein 2%2C mitochondrial-like
XM_019897778.1	NW_017851239.1	869.962	0.539084	0.000656912	poly(A) RNA polymerase%2C mitochondrial
XM_019900183.1	NW_017851737.1	5135.39	0.538568	0.00537816	calcium/calmodulin-dependent protein kinase type II alpha chain%2C transcript variant X1
XM_019901171.1	NW_017851830.1	1137.3	0.537979	4.67e-05	cleavage stimulation factor subunit 2 tau variant
XM_019916189.1	NW_017852381.1	1296.13	0.537719	0.000120582	G protein-coupled receptor kinase 2%2C transcript variant X1
XM_019905086.1	NW_017852058.1	120.067	0.53763	0.00616182	zinc finger protein 184-like
XM_019902978.1	NW_017852017.1	7349	0.53714	0.00322181	NADH-ubiquinone oxidoreductase 75 kDa subunit%2C mitochondrial
XM_019912610.1	NW_017849664.1	68.1368	0.536984	0.00616182	uncharacterized LOC109543081
XM_019908647.1	NW_017852117.1	2325.66	0.536461	1.18e-08	BTB/POZ domain-containing protein 6-like%2C transcript variant X1
XM_019907361.1	NW_017852103.1	2899.04	0.535762	0.0017268	NADH dehydrogenase [ubiquinone] 1 alpha subcomplex subunit 5
XM_019915710.1	NW_017852377.1	587.061	0.535302	0.00160091	leucine-rich repeat protein 1
XM_019913432.1	NW_017852337.1	512.782	0.534987	0.00227225	beta-1%2C3-galactosyltransferase brn
XM_019910667.1	NW_017852245.1	1560.3	0.534684	0.000556286	PQ-loop repeat-containing protein 3
XM_019914353.1	NW_017852358.1	445.548	0.533598	0.00165445	diphthamide biosynthesis protein 1%2C transcript variant X1
XM_019901552.1	NW_017851924.1	689.437	0.532226	0.000309725	uncharacterized LOC109535627
XM_019906250.1	NW_017848797.1	1480.32	0.531556	0.00654622	39S ribosomal protein L11%2C mitochondrial-like
XM_019907545.1	NW_017852103.1	558.21	0.530988	0.00272677	uncharacterized LOC109539658
XM_019915693.1	NW_017852377.1	1480.01	0.530725	0.00662108	39S ribosomal protein L11%2C mitochondrial-like
XM_019905397.1	NW_017852064.1	3189.32	0.5302	0.0038806	uncharacterized LOC109538250
XM_019914088.1	NW_017852350.1	363.154	0.529878	0.00583327	tRNA (adenine(58)-N(1))-methyltransferase non-catalytic subunit TRM6
XM_019913320.1	NW_017852336.1	1359.38	0.529754	0.00120374	ubiquinone biosynthesis monooxygenase COQ6%2C mitochondrial%2C transcript variant X1
XM_019915116.1	NW_017852369.1	1043.28	0.529411	0.00326493	uncharacterized protein C16orf52 homolog A
XM_019911704.1	NW_017852288.1	720.708	0.529382	0.00017154	tudor domain-containing protein 3-like
XM_019901506.1	NW_017844745.1	535.069	0.529235	0.000841777	melanization protease 1-like
XM_019915326.1	NW_017845823.1	859.879	0.528459	9.77e-06	cleavage stimulation factor subunit 2-like
XM_019903628.1	NW_017852030.1	2913.3	0.527725	0.000968827	zinc transporter ZIP9-B%2C transcript variant X1
XM_019911500.1	NW_017852270.1	10874.7	0.527572	0.00939407	26S protease regulatory subunit 4
XM_019907794.1	NW_017848968.1	1132.99	0.527122	3.49e-05	arginine--tRNA ligase%2C cytoplasmic-like
XM_019904813.1	NW_017852056.1	3282.77	0.52689	0.00492647	apolipophorins-like
XM_019913429.1	NW_017849817.1	329.254	0.526857	0.00397495	tRNA (adenine(58)-N(1))-methyltransferase catalytic subunit TRMT61A-like
XM_019914119.1	NW_017852350.1	833.862	0.526662	0.000275983	protein suppressor of forked
XM_019910773.1	NW_017852245.1	354.567	0.526078	0.000480301	methyltransferase-like protein 22%2C transcript variant X1
XM_019913450.1	NW_017852337.1	9714.59	0.525706	0.00477725	proteasome subunit beta type-7
XM_019916770.1	NW_017850687.1	861.372	0.525089	1.19e-05	cleavage stimulation factor subunit 2-like
XM_019917804.1	NW_017851174.1	11975.3	0.524888	0.00175318	26S proteasome non-ATPase regulatory subunit 1
XM_019909811.1	NW_017852166.1	981.526	0.524402	0.000518796	facilitated trehalose transporter Tret1-like
XM_019915379.1	NW_017852371.1	534.325	0.523633	0.0058803	leucine-rich repeat-containing protein 49
XM_019904967.1	NW_017852056.1	2378.35	0.523427	0.000201174	isoleucine--tRNA ligase%2C cytoplasmic
XM_019907803.1	NW_017852106.1	303.848	0.522094	0.00556067	L-aminoadipate-semialdehyde dehydrogenase-phosphopantetheinyl transferase
XM_019912725.1	NW_017852312.1	7446.84	0.521279	0.00339128	dihydrolipoyl dehydrogenase%2C mitochondrial
XM_019903229.1	NW_017852021.1	379.305	0.520916	0.00220067	rRNA methyltransferase 2%2C mitochondrial
XM_019901108.1	NW_017851824.1	376.492	0.520845	0.000411863	methionine--tRNA ligase%2C mitochondrial
XM_019899603.1	NW_017851689.1	1557.72	0.519011	0.00727795	dol-P-Man:Man(7)GlcNAc(2)-PP-Dol alpha-1%2C6-mannosyltransferase
XM_019915555.1	NW_017852374.1	1715.19	0.5178	0.0073325	exodeoxyribonuclease-like
XM_019913634.1	NW_017852340.1	1859.76	0.517237	0.00171305	histone-lysine N-methyltransferase pr-set7
XM_019903180.1	NW_017852021.1	1685.17	0.516972	0.00448947	uncharacterized LOC109536795%2C transcript variant X1
XM_019899159.1	NW_017851647.1	1358.37	0.516736	3.31e-05	conserved oligomeric Golgi complex subunit 4
XM_019904432.1	NW_017852040.1	1346.99	0.516721	0.00103294	28S ribosomal protein S24%2C mitochondrial
XM_019905900.1	NW_017852073.1	1451.43	0.516273	1.35e-06	pre-mRNA 3' end processing protein WDR33
XR_002172207.1	NW_017852126.1	307.092	0.515256	0.00021224	uncharacterized LOC109540534%2C transcript variant X1
XM_019915432.1	NW_017852371.1	9012.09	0.513865	0.0075567	26S protease regulatory subunit 6A-B
XM_019905827.1	NW_017852073.1	567.848	0.513223	0.00348402	N-terminal Xaa-Pro-Lys N-methyltransferase 1
XM_019907086.1	NW_017852096.1	25348.4	0.513106	0.00124202	protein disulfide-isomerase
XM_019918020.1	NW_017851185.1	2635.65	0.512498	1.17e-08	proline-rich protein PRCC%2C transcript variant X1
XM_019914957.1	NW_017852366.1	555.215	0.511555	0.00555821	uncharacterized LOC109544648
XM_019897904.1	NW_017845006.1	1677.89	0.511495	0.000517181	acylglycerol kinase%2C mitochondrial
XM_019912593.1	NW_017852308.1	664.113	0.510906	0.00482714	uncharacterized LOC109543071
XM_019916962.1	NW_017851077.1	1040.92	0.510262	0.00231129	protein farnesyltransferase subunit beta%2C transcript variant X1
XM_019899963.1	NW_017851724.1	1052.4	0.509233	0.00184824	uncharacterized LOC109534333
XM_019910982.1	NW_017852254.1	4680.58	0.508521	0.00845279	delta(3%2C5)-Delta(2%2C4)-dienoyl-CoA isomerase%2C mitochondrial
XM_019903804.1	NW_017852034.1	415.379	0.508433	0.00667325	serine protease easter-like
XM_019915396.1	NW_017852371.1	3186.95	0.507717	0.00449146	serine-arginine protein 55-like
XM_019905586.1	NW_017852064.1	1435.37	0.507643	0.00047719	GTP-binding protein 128up
XM_019907113.1	NW_017852096.1	944.509	0.507539	0.00288394	glycosyltransferase 25 family member
XM_019901277.1	NW_017851854.1	2035.19	0.506831	0.00250612	proteasome maturation protein-like
XM_019907898.1	NW_017852107.1	547.473	0.506294	0.000104021	probable RNA methyltransferase CG11342
XM_019898194.1	NW_017851323.1	718.467	0.506221	0.00542668	probable DNA-directed RNA polymerases I and III subunit RPAC2
XM_019902166.1	NW_017847711.1	2487.84	0.505707	0.00517288	NAD kinase-like
XM_019914204.1	NW_017850018.1	1468.61	0.50507	0.00922437	probable 4-coumarate--CoA ligase 3
XM_019914356.1	NW_017852358.1	2415.01	0.504845	4.57e-06	regulation of nuclear pre-mRNA domain-containing protein 1B
XM_019912629.1	NW_017852310.1	1874.96	0.503354	0.000302294	E3 ubiquitin-protein ligase TRIM33
XM_019905242.1	NW_017852059.1	959.559	0.503069	0.00143378	vacuolar-sorting protein SNF8
XM_019901527.1	NW_017851920.1	528.477	0.502797	0.00269246	mitochondrial 2-oxodicarboxylate carrier
XM_019905923.1	NW_017852073.1	1264.7	0.502353	0.00188199	probable 28S ribosomal protein S25%2C mitochondrial%2C transcript variant X1
XM_019907777.1	NW_017852106.1	1509.81	0.502196	3.35e-05	39S ribosomal protein L30%2C mitochondrial
XM_019905038.1	NW_017852056.1	2588.09	0.502064	0.000111501	UDP-xylose and UDP-N-acetylglucosamine transporter-like%2C transcript variant X1
XM_019913826.1	NW_017852346.1	524.308	0.501754	0.00194573	pre-mRNA-splicing factor 18-like
XM_019901504.1	NW_017851913.1	504.09	0.501412	0.00305128	tRNA (adenine(58)-N(1))-methyltransferase catalytic subunit TRMT61A-like
XM_019917147.1	NW_017851087.1	2669.39	0.501395	0.0065785	selenoprotein M-like%2C transcript variant X1
XM_019900816.1	NW_017851816.1	1715.89	0.50096	0.00653675	surfeit locus protein 6 homolog
XM_019918045.1	NW_017851187.1	4595.27	0.500407	0.00598195	chromosome-associated kinesin KIF4%2C transcript variant X1
XM_019898506.1	NW_017851452.1	917.635	0.500328	0.00231643	mediator of RNA polymerase II transcription subunit 22
XM_019903785.1	NW_017852032.1	2063.61	0.49987	2.71e-05	protein phosphatase methylesterase 1%2C transcript variant X1
XM_019910493.1	NW_017852233.1	379.429	0.499845	0.00322098	post-GPI attachment to proteins factor 2-like
XM_019906367.1	NW_017848819.1	379.469	0.499841	0.00322668	post-GPI attachment to proteins factor 2-like
XM_019910492.1	NW_017852233.1	379.314	0.49893	0.00325025	post-GPI attachment to proteins factor 2-like
XM_019915250.1	NW_017852369.1	3717.41	0.49858	0.00947565	monoacylglycerol lipase ABHD12-like%2C transcript variant X1
XR_002172610.1	NW_017845819.1	674.192	0.498229	0.00182243	THAP domain-containing protein 4-like%2C transcript variant X1
XM_019905083.1	NW_017852058.1	114.799	0.498184	0.00908819	zinc finger protein 878-like
XM_019907695.1	NW_017852104.1	1009.59	0.497694	0.000224808	ATP-dependent RNA helicase SUV3 homolog%2C mitochondrial%2C transcript variant X1
XM_019899520.1	NW_017851677.1	3980.81	0.49754	0.00467017	proteasome maturation protein-like
XM_019899066.1	NW_017851632.1	1117.62	0.496607	0.00175032	histone-lysine N-methyltransferase NSD2
XM_019911837.1	NW_017852296.1	490.077	0.495797	0.00188199	uncharacterized LOC109542565
XM_019906918.1	NW_017852091.1	2361.65	0.495364	2.14e-05	39S ribosomal protein L9%2C mitochondrial
XM_019902867.1	NW_017852016.1	1320.34	0.494975	2.41e-05	39S ribosomal protein L51%2C mitochondrial
XM_019912034.1	NW_017852300.1	10435.3	0.494928	0.00622223	cytochrome c oxidase subunit 7C%2C mitochondrial-like%2C transcript variant X1
XM_019904253.1	NW_017852037.1	685.592	0.494757	0.0053072	probable glutamate--tRNA ligase%2C mitochondrial
XM_019917915.1	NW_017851181.1	855.632	0.494557	8.3e-05	integrator complex subunit 2
XM_019902247.1	NW_017852003.1	870.203	0.493969	0.00344935	CAS1 domain-containing protein 1
XM_019906686.1	NW_017852086.1	7506.53	0.493935	0.000565124	proteasome activator complex subunit 3%2C transcript variant X1
XM_019915661.1	NW_017852377.1	1709.84	0.493343	0.00504639	probable ATP-dependent RNA helicase Dbp73D
XM_019905653.1	NW_017852068.1	5320.26	0.493261	0.000180695	T-complex protein 1 subunit beta
XM_019912874.1	NW_017852315.1	1831.27	0.493225	0.000373299	alpha- and gamma-adaptin-binding protein p34-like
XM_019901583.1	NW_017851926.1	739.14	0.492588	0.00385139	nicotinamide/nicotinic acid mononucleotide adenylyltransferase 1
XM_019915409.1	NW_017852371.1	1098.3	0.492543	0.000921838	m7GpppN-mRNA hydrolase
XM_019903982.1	NW_017852037.1	5759.26	0.491768	0.000336688	eukaryotic translation initiation factor 4E-1A-like
XM_019900417.1	NW_017851765.1	1360.94	0.490643	0.00155561	39S ribosomal protein L41%2C mitochondrial
XM_019915712.1	NW_017852377.1	2259.99	0.490636	0.000223363	DDB1- and CUL4-associated factor 5%2C transcript variant X1
XM_019913663.1	NW_017852342.1	918.778	0.48983	0.00847856	uncharacterized LOC109543795%2C transcript variant X1
XM_019910054.1	NW_017852173.1	606.479	0.489674	0.000725223	COMM domain-containing protein 3%2C transcript variant X1
XM_019898733.1	NW_017851531.1	1800.4	0.48807	0.00633169	uncharacterized LOC109533418
XM_019898057.1	NW_017851282.1	1783.68	0.487838	0.00143991	striatin-interacting protein 1%2C transcript variant X1
XM_019912864.1	NW_017852313.1	8200.49	0.487019	0.00174127	NADH dehydrogenase [ubiquinone] flavoprotein 1%2C mitochondrial
XM_019917248.1	NW_017851125.1	651.879	0.486566	0.00150515	SET and MYND domain-containing protein 5
XM_019905737.1	NW_017852071.1	787.223	0.486214	0.00157249	protein FAN-like
XM_019906286.1	NW_017852082.1	2968.59	0.485833	0.00604729	NADH dehydrogenase [ubiquinone] flavoprotein 2%2C mitochondrial%2C transcript variant X1
XM_019903313.1	NW_017852026.1	2773.88	0.485292	0.00194522	tudor domain-containing protein 1-like%2C transcript variant X1
XM_019905691.1	NW_017852068.1	597.264	0.484039	0.00314334	uncharacterized LOC109538449%2C transcript variant X1
XM_019916083.1	NW_017852381.1	1288.67	0.483878	0.000174097	calcium homeostasis endoplasmic reticulum protein%2C transcript variant X1
XM_019914980.1	NW_017852366.1	1083.71	0.483595	0.00149942	GTPase Era%2C mitochondrial
XM_019902071.1	NW_017847663.1	242.348	0.483362	0.00778388	serine--tRNA ligase%2C chloroplastic/mitochondrial-like
XM_019914221.1	NW_017852355.1	6992.61	0.482306	2.82e-07	microtubule-associated protein RP/EB family member 1%2C transcript variant X1
XM_019908142.1	NW_017849021.1	506.354	0.481433	0.000150389	N-alpha-acetyltransferase 15%2C NatA auxiliary subunit-like
XM_019906028.1	NW_017852073.1	8701.34	0.481117	0.00493755	26S proteasome non-ATPase regulatory subunit 7
XM_019915048.1	NW_017852368.1	1093.16	0.481016	8.51e-05	beta-catenin-like protein 1
XM_019902555.1	NW_017852012.1	671.846	0.480932	0.00228555	nucleoporin seh1
XM_019913753.1	NW_017852342.1	3098.72	0.479968	0.00160091	nicalin
XM_019902677.1	NW_017852012.1	2244.83	0.479254	0.00875476	protein NEDD1%2C transcript variant X1
XM_019913768.1	NW_017852342.1	599.862	0.479251	0.000958171	uncharacterized LOC109543853%2C transcript variant X1
XM_019916256.1	NW_017852381.1	591.381	0.478977	0.00310104	THO complex subunit 6 homolog
XM_019905822.1	NW_017852073.1	1940.48	0.478829	0.00176517	39S ribosomal protein L3%2C mitochondrial
XM_019899794.1	NW_017851704.1	2209.1	0.478769	1.83e-05	J domain-containing protein CG6693
XM_019914852.1	NW_017852366.1	3355.65	0.478032	0.00710119	NAD kinase-like%2C transcript variant X1
XM_019914814.1	NW_017852366.1	1015.16	0.477914	0.00478606	protein wntless
XM_019900149.1	NW_017851737.1	1613.71	0.477898	0.00438133	uridine diphosphate glucose pyrophosphatase-like
XM_019915582.1	NW_017852375.1	917.525	0.477512	0.0050832	protein-L-isoaspartate(D-aspartate) O-methyltransferase%2C transcript variant X1
XM_019900082.1	NW_017851724.1	1286.89	0.47643	0.00918967	surfeit locus protein 1
XM_019904146.1	NW_017852037.1	1663.18	0.476255	0.000598997	39S ribosomal protein L47%2C mitochondrial
XM_019898509.1	NW_017851452.1	376.627	0.475978	0.000554016	protein UXT homolog%2C transcript variant X1
XM_019900060.1	NW_017851724.1	3365.43	0.475699	1.41e-06	NADH dehydrogenase [ubiquinone] 1 alpha subcomplex assembly factor 8-like%2C transcript variant X1
XM_019908559.1	NW_017852117.1	713.142	0.475491	0.00847856	isoleucine--tRNA ligase%2C mitochondrial%2C transcript variant X1
XM_019906192.1	NW_017848797.1	545.903	0.475103	0.00178475	D-beta-hydroxybutyrate dehydrogenase%2C mitochondrial-like
XM_019915685.1	NW_017852377.1	545.903	0.475103	0.00178475	D-beta-hydroxybutyrate dehydrogenase%2C mitochondrial-like
XM_019902289.1	NW_017852003.1	1163.27	0.475066	0.00091797	uncharacterized LOC109536182%2C transcript variant X1
XM_019899528.1	NW_017851680.1	1468.91	0.474909	2.43e-05	coiled-coil domain-containing protein 28A%2C transcript variant X1
XM_019907271.1	NW_017852100.1	629.924	0.474809	0.00396058	lariat debranching enzyme
XM_019908726.1	NW_017852118.1	1759.59	0.473592	0.00147269	WD and tetratricopeptide repeats protein 1-like
XM_019911787.1	NW_017852296.1	967.533	0.472389	0.000476401	serine/threonine-protein phosphatase 2A activator-like
XM_019902935.1	NW_017852017.1	853.042	0.472164	1.19e-06	cytosolic Fe-S cluster assembly factor NUBP2 homolog
XM_019917577.1	NW_017851165.1	1501.27	0.471483	0.000282927	peptidyl-prolyl cis-trans isomerase-like 2
XM_019914235.1	NW_017852355.1	1047.31	0.471007	0.0017917	ras-related protein Rab-43%2C transcript variant X1
XM_019906049.1	NW_017852073.1	1984.43	0.470921	1.24e-07	COP9 signalosome complex subunit 6
XM_019900952.1	NW_017851824.1	774.772	0.470887	0.000901503	WD repeat-containing protein 24
XM_019900391.1	NW_017851760.1	5748.36	0.470654	0.00564751	endoplasmic reticulum lectin 1-like
XM_019905281.1	NW_017852061.1	13846.6	0.470312	0.00287782	26S protease regulatory subunit 7
XM_019898747.1	NW_017851531.1	842.366	0.468792	0.00200183	mitochondrial import inner membrane translocase subunit Tim22
XM_019900869.1	NW_017851820.1	2641.77	0.468746	0.00066701	bystin
XM_019905539.1	NW_017852064.1	1556.23	0.468712	0.000153547	E3 ubiquitin-protein ligase CHIP
XM_019899386.1	NW_017846825.1	5386.71	0.468285	0.00600094	endoplasmic reticulum lectin 1-like
XM_019917784.1	NW_017851174.1	2313.19	0.466961	4.12e-06	ubiquitin-protein ligase E3C
XM_019913757.1	NW_017852342.1	1068.38	0.466639	0.00749518	kelch-like protein 30%2C transcript variant X1
XM_019912646.1	NW_017852311.1	14495.3	0.46655	0.00898011	protein SERAC1-like%2C transcript variant X1
XM_019906153.1	NW_017852076.1	1178.41	0.465644	0.00519385	arginine-hydroxylase NDUFAF5%2C mitochondrial
XM_019913606.1	NW_017852340.1	1029.99	0.46501	0.00538395	regulator of microtubule dynamics protein 2-like
XM_019902066.1	NW_017851984.1	1638.9	0.464916	0.00584054	beclin 1-associated autophagy-related key regulator%2C transcript variant X1
XM_019903925.1	NW_017852037.1	2259.68	0.464366	6.2e-05	39S ribosomal protein L15%2C mitochondrial
XM_019902400.1	NW_017847751.1	2280.36	0.464294	1.74e-05	gametocyte-specific factor 1 homolog
XM_019903153.1	NW_017847924.1	2280.31	0.464164	1.75e-05	gametocyte-specific factor 1 homolog
XM_019915495.1	NW_017852371.1	1082.1	0.4641	0.000633048	ADP-ribosylation factor-like protein 2
XM_019910029.1	NW_017852168.1	2854.99	0.463377	3.17e-07	RISC-loading complex subunit tarbp2-like
XM_019910581.1	NW_017852241.1	2600.26	0.463199	0.000856974	apoptosis-inducing factor 1%2C mitochondrial%2C transcript variant X1
XM_019915630.1	NW_017852377.1	774.886	0.463094	0.00581696	WD repeat-containing protein 89%2C transcript variant X1
XM_019918130.1	NW_017851196.1	3404.24	0.462432	0.00946317	receptor expression-enhancing protein 1%2C transcript variant X1
XM_019914937.1	NW_017852366.1	1208.49	0.462295	0.00366857	chitinase domain-containing protein 1
XM_019913419.1	NW_017852337.1	485.896	0.461628	8.41e-05	pre-mRNA-splicing factor SPF27
XM_019917598.1	NW_017851165.1	996.951	0.46146	0.000286498	lys-63-specific deubiquitinase BRCC36-like
XM_019907422.1	NW_017852103.1	900.568	0.46049	1.21e-05	pre-mRNA-splicing factor ISY1 homolog
XM_019902768.1	NW_017847848.1	873.312	0.459798	0.00876712	DNA replication licensing factor Mcm7-like
XM_019905679.1	NW_017852068.1	873.312	0.459798	0.00876712	DNA replication licensing factor Mcm7-like
XM_019914421.1	NW_017852359.1	1447.65	0.459174	0.00462418	tRNA pseudouridine synthase A%2C mitochondrial
XM_019904601.1	NW_017852049.1	2531.51	0.457767	0.000144504	leucine-rich repeat-containing protein 40-like%2C transcript variant X1
XM_019911264.1	NW_017849469.1	680.16	0.455924	0.00833306	histone-lysine N-methyltransferase PRDM9-like
XM_019917560.1	NW_017846126.1	679.238	0.455511	0.00838029	histone-lysine N-methyltransferase PRDM9-like
XM_019914124.1	NW_017852350.1	1861.89	0.454167	0.000967108	probable prefoldin subunit 4
XM_019913157.1	NW_017852328.1	682.134	0.454003	5.26e-05	trafficking protein particle complex subunit 5
XM_019904015.1	NW_017852037.1	2825.9	0.4539	0.00218827	ubiquitin-like-conjugating enzyme ATG3
XM_019914768.1	NW_017852366.1	891.116	0.452779	0.00908423	U6 snRNA-associated Sm-like protein LSm7%2C transcript variant X1
XM_019900626.1	NW_017851783.1	2273.16	0.452537	0.00382561	cyclin-related protein FAM58A
XM_019912637.1	NW_017852310.1	1451.72	0.452425	0.0067636	N-alpha-acetyltransferase 20%2C transcript variant X1
XM_019916936.1	NW_017851008.1	456.029	0.451084	0.00117803	oligoribonuclease%2C mitochondrial-like
XM_019912873.1	NW_017852315.1	1763.61	0.450151	0.000722308	periodic tryptophan protein 1 homolog
XM_019913269.1	NW_017852336.1	502.545	0.450051	0.000855	cysteine-rich protein 2-binding protein%2C transcript variant X1
XM_019910863.1	NW_017852247.1	999.816	0.449876	0.00396127	ribonucleases P/MRP protein subunit POP1
XR_002172719.1	NW_017850780.1	302.826	0.44859	0.00476021	uncharacterized LOC109545979
XM_019900918.1	NW_017851823.1	487.842	0.448356	0.00440516	putative transferase CAF17 homolog%2C mitochondrial
XM_019911783.1	NW_017852296.1	2958.89	0.44829	0.000248542	uncharacterized LOC109542528
XM_019911274.1	NW_017852264.1	1101.99	0.44788	0.0044912	YEATS domain-containing protein 4%2C transcript variant X1
XM_019900263.1	NW_017851737.1	486.02	0.447164	0.00916487	probable ATP-dependent RNA helicase DDX20
XM_019901700.1	NW_017851937.1	2318.89	0.44658	0.00160091	39S ribosomal protein L10%2C mitochondrial
XM_019911202.1	NW_017852263.1	841.599	0.442984	0.00580556	uncharacterized LOC109542132%2C transcript variant X1
XM_019904512.1	NW_017852043.1	994.628	0.442616	0.00273856	zinc finger and SCAN domain-containing protein 12-like
XM_019899146.1	NW_017851646.1	16833	0.441599	0.00983049	polycomb protein Scm-like%2C transcript variant X1
XM_019915860.1	NW_017852380.1	1433.27	0.441061	0.00372556	CDK5RAP1-like protein
XM_019917261.1	NW_017851131.1	983.604	0.440856	0.00036745	8-oxo-dGDP phosphatase NUDT18%2C transcript variant X1
XM_019908181.1	NW_017852110.1	3906.64	0.44039	0.00626977	lysophospholipid acyltransferase 5%2C transcript variant X1
XM_019904822.1	NW_017848453.1	348.499	0.440309	0.0050077	WD and tetratricopeptide repeats protein 1-like
XM_019915397.1	NW_017852371.1	1594.44	0.439572	0.00045097	intron-binding protein aquarius%2C transcript variant X1
XM_019912294.1	NW_017852302.1	1243.71	0.43937	0.00292622	PDZ domain-containing protein 8%2C transcript variant X1
XM_019899543.1	NW_017851680.1	774.368	0.438958	0.00236891	negative elongation factor E%2C transcript variant X1
XM_019911478.1	NW_017852269.1	2386.64	0.438579	0.00546923	uncharacterized LOC109542302
XM_019900049.1	NW_017851724.1	1041.04	0.438432	0.000599303	retinoblastoma-binding protein 5 homolog%2C transcript variant X1
XM_019917579.1	NW_017851165.1	5455.58	0.438099	0.0054412	ubiquitin-conjugating enzyme E2-24 kDa%2C transcript variant X1
XM_019913745.1	NW_017852342.1	3008.23	0.437602	0.00350501	polycomb group protein FERTILIZATION-INDEPENDENT SEED 2-like%2C transcript variant X1
XM_019902541.1	NW_017852012.1	919.678	0.437188	0.00626603	translation initiation factor IF-2%2C mitochondrial
XM_019905483.1	NW_017848653.1	930.972	0.437033	0.000407236	N-alpha-acetyltransferase 15%2C NatA auxiliary subunit-like
XM_019910121.1	NW_017849321.1	1137.06	0.437026	0.00666658	prefoldin subunit 3-like
XM_019901525.1	NW_017851920.1	929.005	0.436966	0.000644301	uncharacterized LOC109535608
XM_019909243.1	NW_017852156.1	1579.87	0.436604	0.00209715	ribosome biogenesis protein WDR12 homolog
XM_019913829.1	NW_017852346.1	1302.12	0.436492	0.00717049	pyrroline-5-carboxylate reductase-like
XM_019907073.1	NW_017848916.1	1073.54	0.436255	0.00155073	arginine--tRNA ligase%2C cytoplasmic-like
XR_002172720.1	NW_017850781.1	303.428	0.435689	0.00580556	uncharacterized LOC109545983
XM_019915956.1	NW_017850342.1	601.573	0.435384	0.000477919	uncharacterized LOC109545327
XM_019916937.1	NW_017851016.1	336.657	0.434579	0.00912786	WD and tetratricopeptide repeats protein 1-like
XM_019911058.1	NW_017852257.1	902.634	0.431578	0.00717049	splicing factor 3B subunit 5
XM_019909164.1	NW_017852139.1	1596.97	0.430756	0.00382454	protein mago nashi
XM_019917088.1	NW_017851087.1	1315.09	0.429857	0.00300735	splicing factor 3A subunit 3
XM_019897826.1	NW_017851242.1	5597.83	0.429036	0.00120521	interleukin enhancer-binding factor 2 homolog%2C transcript variant X1
XM_019918260.1	NW_017851223.1	2482.5	0.428664	0.00257369	mitochondrial pyruvate carrier 2-like
XM_019903783.1	NW_017852032.1	988.662	0.428365	0.0038806	NEDD8-conjugating enzyme UBE2F-like%2C transcript variant X1
XM_019913170.1	NW_017852328.1	2482.89	0.428291	0.00262624	mitochondrial pyruvate carrier 2-like
XM_019915405.1	NW_017852371.1	1329.42	0.428203	0.000570945	protein SDE2 homolog
XM_019901420.1	NW_017851883.1	1847.69	0.425993	0.000777954	glycerol-3-phosphate phosphatase
XM_019917921.1	NW_017851181.1	2668.11	0.425579	0.00394108	histone chaperone asf1
XM_019912253.1	NW_017852302.1	3002.31	0.425091	0.00521796	protein preli-like%2C transcript variant X1
XM_019915471.1	NW_017852371.1	1485.66	0.423669	2.66e-05	integrator complex subunit 9
XM_019913933.1	NW_017852348.1	1186.4	0.42292	0.00208267	NEDD8-activating enzyme E1 catalytic subunit
XM_019899034.1	NW_017851619.1	356.083	0.421521	0.00324546	nucleolar protein 14 homolog
XM_019897932.1	NW_017851282.1	5615.36	0.421312	0.00037586	small glutamine-rich tetratricopeptide repeat-containing protein beta-like%2C transcript variant X1
XM_019902258.1	NW_017852003.1	933.992	0.420956	0.00205334	dr1-associated corepressor
XM_019899450.1	NW_017851662.1	1218.96	0.420591	0.00279125	calpain-D-like
XM_019901560.1	NW_017851924.1	1573.7	0.420387	0.00117313	malignant T-cell-amplified sequence 1 homolog
XM_019906514.1	NW_017852083.1	1546.49	0.420269	0.000491055	telomerase Cajal body protein 1%2C transcript variant X1
XM_019899921.1	NW_017851724.1	2620.42	0.418914	0.00100027	AFG3-like protein 2
XM_019902101.1	NW_017851993.1	2515.32	0.418527	0.00478606	28S ribosomal protein S22%2C mitochondrial
XM_019898720.1	NW_017851525.1	1274.71	0.417694	0.00309268	39S ribosomal protein L22%2C mitochondrial
XM_019910470.1	NW_017852228.1	1932.63	0.41685	0.000776509	prefoldin subunit 3-like
XM_019909090.1	NW_017852128.1	3710.55	0.416801	0.00419385	threonine--tRNA ligase%2C cytoplasmic%2C transcript variant X1
XM_019910147.1	NW_017852176.1	1038.25	0.414639	0.00878315	actin-like protein 6B
XM_019905191.1	NW_017852058.1	2469.03	0.413295	0.00394108	DNA topoisomerase 2
XM_019900021.1	NW_017851724.1	963.293	0.413279	0.00719354	WASH complex subunit strumpellin%2C transcript variant X1
XM_019904255.1	NW_017852037.1	1477.63	0.41254	3.38e-07	DCN1-like protein 1
XM_019914649.1	NW_017850082.1	1597.14	0.412302	0.000802129	prefoldin subunit 3-like
XM_019910464.1	NW_017852228.1	1597.13	0.412037	0.000758556	prefoldin subunit 3-like
XM_019912062.1	NW_017849592.1	2024.42	0.412024	0.000255777	periodic tryptophan protein 1 homolog
XM_019912706.1	NW_017852312.1	1636.77	0.411284	0.006171	ubiquitin-like protein 5
XM_019899415.1	NW_017851654.1	2857.35	0.409503	0.00824088	glucosamine-6-phosphate isomerase-like
XM_019899455.1	NW_017851662.1	1183.73	0.409046	0.00284796	single-stranded DNA-binding protein%2C mitochondrial-like
XM_019904619.1	NW_017852049.1	13372.5	0.408689	0.00486573	casein kinase I%2C transcript variant X1
XM_019915518.1	NW_017852372.1	2179.85	0.408092	0.00326493	histone-lysine N-methyltransferase setd3-like
XM_019914718.1	NW_017852366.1	2320.69	0.407306	0.00538118	COP9 signalosome complex subunit 4
XM_019907486.1	NW_017852103.1	5606.98	0.406355	0.00233572	elongation factor Tu-like
XM_019901690.1	NW_017851937.1	830.991	0.40609	0.00622718	small integral membrane protein 8%2C transcript variant X1
XM_019900474.1	NW_017851775.1	2590.06	0.405671	0.00210892	probable RNA polymerase II nuclear localization protein SLC7A6OS
XM_019908780.1	NW_017852123.1	923.593	0.402959	0.000229742	poly(ADP-ribose) glycohydrolase
XM_019917227.1	NW_017851115.1	5910.94	0.40226	0.00200183	transcription factor Dp-1%2C transcript variant X1
XM_019904085.1	NW_017848199.1	697.048	0.401922	0.00292988	glycerol-3-phosphate phosphatase-like
XM_019917619.1	NW_017851170.1	2099.05	0.401872	1.79e-06	inositol polyphosphate 5-phosphatase OCRL-1%2C transcript variant X1
XM_019901411.1	NW_017851883.1	697.77	0.401674	0.00264937	glycerol-3-phosphate phosphatase-like
XM_019902982.1	NW_017852017.1	2970.45	0.401583	0.000962886	GRIP and coiled-coil domain-containing protein 2-like
XM_019899923.1	NW_017851724.1	1353.12	0.401539	0.00575816	N-alpha-acetyltransferase 35%2C NatC auxiliary subunit
XM_019910525.1	NW_017852235.1	1050.5	0.400835	0.00153068	protein maelstrom 1
XM_019910817.1	NW_017852245.1	1716.85	0.400823	0.00267642	ran GTPase-activating protein 1
XM_019912850.1	NW_017852313.1	3045.3	0.40034	0.00603198	serine/arginine-rich splicing factor 1A%2C transcript variant X1
XM_019915035.1	NW_017852368.1	779.774	0.399962	0.00234451	coiled-coil domain-containing protein 134-like
XM_019913800.1	NW_017852345.1	1274.43	0.399946	0.00390261	probable ATP-dependent RNA helicase DDX55 homolog
XM_019907065.1	NW_017852096.1	1552.4	0.399078	0.00487059	uncharacterized LOC109539367
XM_019907106.1	NW_017852096.1	2929.77	0.398858	4.12e-05	protein ABHD16A-like
XM_019900671.1	NW_017851783.1	1406.36	0.398662	0.00169662	glycosylphosphatidylinositol anchor attachment 1 protein
XM_019913799.1	NW_017852345.1	1242.83	0.396938	0.0037545	probable ATP-dependent RNA helicase DDX55 homolog
XM_019913518.1	NW_017852339.1	2188.41	0.395277	0.000143297	28S ribosomal protein S27%2C mitochondrial
XM_019914313.1	NW_017852358.1	282.903	0.394972	0.0020932	probable methyltransferase BMT2 homolog
XM_019902148.1	NW_017847707.1	460.924	0.393685	0.0089674	pre-mRNA-splicing factor 18-like
XM_019910021.1	NW_017852168.1	1065.52	0.39367	0.000476493	oligoribonuclease-like
XM_019916956.1	NW_017851067.1	268.743	0.390886	0.00941657	integrator complex subunit 4-like
XM_019902081.1	NW_017851988.1	1589.96	0.389163	0.000471736	centromere/kinetochore protein zw10 homolog
XM_019913310.1	NW_017852336.1	417.54	0.389163	0.00883762	carnosine N-methyltransferase
XM_019911129.1	NW_017852258.1	599.083	0.388853	0.00441592	ribonuclease P protein subunit p25-like protein
XM_019912714.1	NW_017852312.1	1882.1	0.38879	0.000266013	nuclear receptor-binding factor 2-like%2C transcript variant X1
XM_019911089.1	NW_017852258.1	1964.73	0.38843	0.00925419	sorting nexin-7-like
XM_019913404.1	NW_017849817.1	816.032	0.388239	0.00815176	UPF0415 protein C7orf25 homolog
XM_019914856.1	NW_017852366.1	959.379	0.387973	0.00223729	U3 small nucleolar RNA-associated protein 15 homolog
XM_019904232.1	NW_017852037.1	814.467	0.387681	0.000644301	presenilins-associated rhomboid-like protein%2C mitochondrial
XM_019905177.1	NW_017852058.1	1047.83	0.386977	0.00275979	serine/threonine-protein phosphatase 4 regulatory subunit 4-like%2C transcript variant X1
XM_019914958.1	NW_017852366.1	2016.98	0.386377	0.00642541	vitamin K epoxide reductase complex subunit 1
XM_019901075.1	NW_017851824.1	1172.34	0.385151	0.00038977	protein MTO1 homolog%2C mitochondrial%2C transcript variant X1
XM_019904087.1	NW_017852037.1	482.172	0.384917	0.00359924	transmembrane protein 242
XM_019911107.1	NW_017852258.1	1236.89	0.38452	0.00402584	probable small nuclear ribonucleoprotein G
XM_019902366.1	NW_017852012.1	1356.27	0.383199	0.00028708	BTB/POZ domain-containing protein KCTD3
XM_019904553.1	NW_017852043.1	550.77	0.382897	0.00908819	U6 snRNA-associated Sm-like protein LSm5%2C transcript variant X1
XM_019900921.1	NW_017851823.1	1128.77	0.382463	0.00586527	tubulin--tyrosine ligase-like protein 12
XM_019914406.1	NW_017852359.1	4146.85	0.382223	0.00108012	chromatin assembly factor 1 subunit A-like%2C transcript variant X1
XM_019907193.1	NW_017852100.1	1072.8	0.382088	0.000153048	adenylate kinase isoenzyme 6
XM_019914219.1	NW_017852355.1	2270.81	0.381611	0.00488618	probable 39S ribosomal protein L45%2C mitochondrial
XM_019907889.1	NW_017852107.1	2429.96	0.381412	0.0058803	SUN domain-containing ossification factor
XM_019909617.1	NW_017852166.1	2380.41	0.381331	0.00349741	retinol dehydrogenase 13-like
XM_019912218.1	NW_017852302.1	1245.21	0.381043	0.00188387	geranylgeranyl transferase type-1 subunit beta
XM_019908948.1	NW_017852126.1	1064.94	0.380987	0.00172546	nuclear pore membrane glycoprotein 210
XM_019915604.1	NW_017850268.1	1797.23	0.379498	0.00114477	centromere/kinetochore protein zw10 homolog
XM_019899655.1	NW_017851694.1	5176.8	0.378281	0.00141102	dipeptidyl peptidase 3
XM_019901281.1	NW_017851856.1	878.642	0.377985	0.0020932	centromere/kinetochore protein zw10 homolog
XM_019903078.1	NW_017852017.1	2010.52	0.377269	0.0037545	28S ribosomal protein S33%2C mitochondrial
XM_019902685.1	NW_017852012.1	904.61	0.376499	0.00929031	nuclear transcription factor Y subunit gamma%2C transcript variant X1
XM_019905235.1	NW_017852059.1	640.957	0.376371	0.00325025	probable dolichyl pyrophosphate Glc1Man9GlcNAc2 alpha-1%2C3-glucosyltransferase
XM_019898377.1	NW_017851403.1	1455.74	0.376238	0.00310417	RNA-binding protein 45
XM_019904937.1	NW_017848485.1	774.972	0.375923	0.00841051	N-alpha-acetyltransferase 15%2C NatA auxiliary subunit-like
XM_019905206.1	NW_017852058.1	724.01	0.374565	0.00361606	tctex1 domain-containing protein 2-like
XM_019916334.1	NW_017852381.1	1091.76	0.374443	0.00545713	TGF-beta-activated kinase 1 and MAP3K7-binding protein 1-like
XM_019902752.1	NW_017852014.1	1358.47	0.373505	0.00494305	vacuolar protein sorting-associated protein 13B-like
XM_019913266.1	NW_017852336.1	582.323	0.37245	0.00649936	sister chromatid cohesion protein DCC1
XM_019915729.1	NW_017852377.1	1751.6	0.370866	0.00560902	protein FAM192A%2C transcript variant X1
XM_019904883.1	NW_017852056.1	1174.54	0.370438	0.0027319	leishmanolysin-like peptidase
XM_019901561.1	NW_017851924.1	755.795	0.370407	0.00365278	7-methylguanosine phosphate-specific 5'-nucleotidase%2C transcript variant X1
XM_019900899.1	NW_017851823.1	1292.55	0.369905	0.00811555	protein AATF
XM_019902550.1	NW_017852012.1	681.894	0.369776	0.000187024	neuralized-like protein 2
XM_019903931.1	NW_017852037.1	1351.22	0.369165	3.62e-05	cleavage stimulation factor subunit 1
XM_019906277.1	NW_017852082.1	3304.34	0.367193	0.00986239	uncharacterized LOC109538862%2C transcript variant X1
XM_019899047.1	NW_017851629.1	1806.37	0.366101	0.00647435	bromodomain-containing protein 7%2C transcript variant X1
XM_019907846.1	NW_017852107.1	2372.95	0.364271	0.00948608	xaa-Pro aminopeptidase 1
XM_019911130.1	NW_017852258.1	3406.67	0.363493	0.000536364	protein TRC8 homolog
XM_019900301.1	NW_017851749.1	1524.95	0.362056	0.0018625	polyphosphoinositide phosphatase-like
XM_019899565.1	NW_017851682.1	202.65	0.361962	0.00448947	ribosomal protein S6 kinase alpha-3-like
XM_019903132.1	NW_017852021.1	2165.97	0.360807	0.000922166	uncharacterized LOC109536774
XM_019904951.1	NW_017848485.1	591.808	0.360487	0.00481614	DNA-directed RNA polymerase III subunit RPC3-like
XM_019913311.1	NW_017852336.1	929.944	0.360432	2.26e-05	tRNA (adenine(37)-N6)-methyltransferase-like%2C transcript variant X1
XM_019916667.1	NW_017850500.1	1251.5	0.358872	0.00142024	polyphosphoinositide phosphatase-like
XM_019918258.1	NW_017851223.1	547.309	0.357411	5.51e-05	non-structural maintenance of chromosomes element 1 homolog
XM_019918188.1	NW_017851209.1	1478.62	0.357126	0.00397495	chitobiosyldiphosphodolichol beta-mannosyltransferase
XM_019903865.1	NW_017852034.1	1007.35	0.35706	0.00978104	conserved oligomeric Golgi complex subunit 1%2C transcript variant X1
XM_019899477.1	NW_017851666.1	2314.28	0.356917	1.48e-05	uncharacterized LOC109533955%2C transcript variant X1
XM_019913153.1	NW_017852328.1	547.343	0.356891	5.65e-05	non-structural maintenance of chromosomes element 1 homolog
XM_019915395.1	NW_017852371.1	2373.63	0.355629	0.00762343	protein yippee-like 5
XM_019916809.1	NW_017850761.1	1335.54	0.355338	0.00112961	polyphosphoinositide phosphatase-like
XM_019916678.1	NW_017850520.1	5533.77	0.355257	1.46e-05	secretion-regulating guanine nucleotide exchange factor-like
XM_019914706.1	NW_017850091.1	5534.29	0.355144	1.46e-05	secretion-regulating guanine nucleotide exchange factor-like
XM_019898252.1	NW_017851379.1	829.774	0.350376	0.000110777	TATA-box-binding protein
XM_019904068.1	NW_017852037.1	1924.8	0.349806	0.00187598	uncharacterized protein C18orf19 homolog A
XM_019907722.1	NW_017852104.1	2354.26	0.348871	0.00267638	serine-arginine protein 55-like%2C transcript variant X1
XM_019901633.1	NW_017851931.1	973.108	0.347838	0.00339128	general transcription factor IIH subunit 1
XM_019911552.1	NW_017852276.1	2599.8	0.345752	0.000181838	protein ABHD16A-like
XM_019912734.1	NW_017852312.1	4552.72	0.343517	0.00455133	V-type proton ATPase subunit F 1
XM_019906677.1	NW_017852086.1	1676.95	0.342943	0.00241471	serine/threonine-protein kinase STK11%2C transcript variant X1
XM_019900891.1	NW_017851821.1	1080.43	0.342848	0.00961211	uroporphyrinogen-III synthase-like
XM_019907829.1	NW_017848968.1	1080.43	0.342848	0.00961211	uroporphyrinogen-III synthase-like
XM_019910027.1	NW_017852168.1	1844.44	0.340563	0.00116606	ribosomal protein S6 kinase 2 beta
XM_019902478.1	NW_017852012.1	3776.04	0.339651	0.000597131	armadillo repeat-containing protein 6 homolog
XM_019913260.1	NW_017852336.1	1973.01	0.338464	0.00325025	epidermal growth factor receptor substrate 15-like 1%2C transcript variant X1
XM_019917071.1	NW_017851087.1	2461.9	0.337758	0.00764354	protein sickie%2C transcript variant X1
XM_019904265.1	NW_017852037.1	2478.2	0.337238	1.44e-08	F-box-like/WD repeat-containing protein TBL1XR1%2C transcript variant X1
XM_019899619.1	NW_017851689.1	2566.47	0.332674	0.00512171	mRNA export factor
XM_019902483.1	NW_017852012.1	1483.47	0.33176	0.00051987	HD domain-containing protein 2
XM_019911936.1	NW_017852300.1	4302.86	0.33107	9.78e-10	cullin-1
XM_019902338.1	NW_017852009.1	1349.89	0.328272	0.00454864	DNA-directed RNA polymerase III subunit RPC2
XM_019912721.1	NW_017852312.1	4339.53	0.327783	0.00140943	mitochondrial-processing peptidase subunit alpha%2C transcript variant X1
XM_019899772.1	NW_017851704.1	5616.98	0.327359	0.000517805	CDGSH iron-sulfur domain-containing protein 2 homolog
XM_019907895.1	NW_017852107.1	1295.8	0.326476	0.00766532	ras-related GTP-binding protein A
XM_019906018.1	NW_017852073.1	2776.9	0.326073	0.00526219	calcium uptake protein 1 homolog%2C mitochondrial-like%2C transcript variant X1
XM_019912631.1	NW_017852310.1	1973.09	0.325112	0.00404819	hormone-sensitive lipase%2C transcript variant X1
XM_019898353.1	NW_017851403.1	640.785	0.325022	0.00988776	cell division cycle protein 23 homolog
XM_019907191.1	NW_017852100.1	2303.59	0.32418	0.00503986	DNA/RNA-binding protein KIN17
XM_019909376.1	NW_017852166.1	1647.81	0.323551	0.00638552	katanin p60 ATPase-containing subunit A-like 1%2C transcript variant X1
XM_019907950.1	NW_017852107.1	1663.12	0.321534	0.00514276	SUMO-activating enzyme subunit 1
XM_019915626.1	NW_017852377.1	1247.44	0.31943	0.00636244	probable phenylalanine--tRNA ligase%2C mitochondrial
XM_019904429.1	NW_017852040.1	1301.08	0.318918	0.00175318	golgin-45%2C transcript variant X1
XM_019903919.1	NW_017852037.1	1619.89	0.318257	0.00267638	E3 ubiquitin-protein ligase MIB1
XM_019898686.1	NW_017851515.1	3318.5	0.318203	0.000260169	DDB1- and CUL4-associated factor 8-like%2C transcript variant X1
XM_019906411.1	NW_017848840.1	3318.2	0.318182	0.000280684	DDB1- and CUL4-associated factor 8-like%2C transcript variant X1
XM_019908653.1	NW_017852117.1	1336.28	0.318139	0.00275979	nuclear cap-binding protein subunit 2-like
XM_019913137.1	NW_017852328.1	2543.33	0.316472	0.00292861	serine/threonine-protein phosphatase 6 catalytic subunit-like
XM_019917687.1	NW_017851171.1	2607.6	0.315718	0.00146513	N-acetylglucosamine-6-sulfatase-like
XM_019918254.1	NW_017851223.1	2537.24	0.314504	0.00330841	serine/threonine-protein phosphatase 6 catalytic subunit-like
XM_019908480.1	NW_017852115.1	1685.74	0.312745	0.00983049	vesicle transport protein SEC20
XM_019917547.1	NW_017851162.1	2110.08	0.311989	0.00404243	protein ABHD4-like
XM_019903279.1	NW_017852026.1	1702.36	0.310146	0.00188199	E3 ubiquitin-protein ligase RING1%2C transcript variant X1
XM_019902891.1	NW_017852017.1	2479.71	0.308471	6.69e-05	rab GTPase-binding effector protein 1%2C transcript variant X1
XM_019900141.1	NW_017851737.1	2447.43	0.306296	0.00402432	anamorsin homolog
XM_019910835.1	NW_017852245.1	1748.82	0.305567	0.00507045	uncharacterized LOC109541844%2C transcript variant X1
XM_019915076.1	NW_017852369.1	2038.02	0.304896	0.00934657	pyruvate dehydrogenase phosphatase regulatory subunit%2C mitochondrial
XM_019899036.1	NW_017851619.1	795.993	0.304298	0.00507045	DNA-directed RNA polymerase III subunit RPC2-like
XM_019903474.1	NW_017852029.1	4268.06	0.302609	0.00425131	DNA damage-binding protein 1%2C transcript variant X1
XM_019915078.1	NW_017852369.1	1383.71	0.2991	0.00399276	tRNA dimethylallyltransferase%2C mitochondrial
XM_019907346.1	NW_017848930.1	1312.06	0.298482	0.00904604	ADP-ribosylation factor-like protein 1
XM_019908792.1	NW_017852124.1	2273.79	0.297556	0.00891022	ubiquitin-fold modifier 1%2C transcript variant X1
XM_019916234.1	NW_017852381.1	9675.62	0.297292	0.00788351	MICOS complex subunit Mic60%2C transcript variant X1
XM_019900133.1	NW_017851737.1	2951.99	0.296588	0.00482701	type 2 phosphatidylinositol 4%2C5-bisphosphate 4-phosphatase
XM_019898467.1	NW_017851439.1	1412.81	0.295776	0.00146522	integral membrane protein GPR180
XM_019901913.1	NW_017851949.1	1921.1	0.290458	0.00902682	28S ribosomal protein S2%2C mitochondrial
XM_019903377.1	NW_017852028.1	8433.11	0.290383	0.00844841	serine/threonine-protein phosphatase 2A catalytic subunit beta isoform
XM_019899959.1	NW_017851724.1	803.578	0.289835	0.00781911	ragulator complex protein LAMTOR3-A
XM_019904270.1	NW_017852037.1	2301.73	0.283829	0.0058834	nucleoporin NUP53
XR_002172040.1	NW_017852068.1	1462.79	0.28083	0.0096379	pleiotropic regulator 1%2C transcript variant X1
XM_019903416.1	NW_017852028.1	1090.67	0.279996	0.00768576	nuclear pore complex protein Nup85
XM_019910731.1	NW_017852245.1	5654.31	0.279245	0.0025652	ras-related protein Rac1
XM_019908153.1	NW_017852110.1	1343.75	0.279195	0.00781857	UDP-N-acetylhexosamine pyrophosphorylase-like protein 1
XM_019908500.1	NW_017852115.1	1485.98	0.278255	0.00129835	myotubularin-related protein 10-A
XM_019906824.1	NW_017852091.1	4870.12	0.27754	0.00481849	ancient ubiquitous protein 1-like
XM_019905798.1	NW_017852073.1	1505.73	0.274763	0.00552055	protein CWC15 homolog%2C transcript variant X1
XM_019904752.1	NW_017852055.1	14669.6	0.272052	0.00459154	histone H3.3
XM_019911614.1	NW_017852279.1	13336.3	0.271072	0.000934632	importin subunit alpha-3
XM_019916297.1	NW_017852381.1	2642.85	0.270137	0.00749519	COP9 signalosome complex subunit 7b%2C transcript variant X1
XM_019899802.1	NW_017851710.1	3628.49	0.268842	0.00295498	uncharacterized LOC109534221
XM_019905796.1	NW_017852073.1	2783.91	0.267296	0.0069715	cysteine protease ATG4B
XM_019898453.1	NW_017851439.1	3512.27	0.266259	0.00561993	ubiquitin carboxyl-terminal hydrolase 5
XM_019907924.1	NW_017852107.1	2031.16	0.257109	0.00462521	SH3 domain-binding glutamic acid-rich protein homolog%2C transcript variant X1
XM_019897872.1	NW_017851260.1	1441.6	0.253381	0.00855084	uncharacterized LOC109532808
XM_019911466.1	NW_017852269.1	2172.99	0.253367	0.00538118	ras-related protein Rab-21
XM_019902569.1	NW_017852012.1	2357.2	0.252717	0.00264698	TM2 domain-containing protein almondex
XM_019905094.1	NW_017852058.1	9171.2	0.24802	0.00215685	uncharacterized LOC109538054
XM_019900924.1	NW_017851823.1	2440.91	0.243595	0.00851694	tRNA (cytosine(34)-C(5))-methyltransferase
XM_019907399.1	NW_017852103.1	5059.62	0.228972	0.00998844	endoplasmic reticulum resident protein 44%2C transcript variant X1
XM_019914303.1	NW_017852358.1	3353.75	0.183593	0.00394108	serine/threonine-protein phosphatase 4 catalytic subunit%2C transcript variant X1
XM_019905751.1	NW_017852072.1	3952.02	-0.192995	0.000783938	non-structural maintenance of chromosomes element 4 homolog A-like
XM_019904154.1	NW_017852037.1	2631.81	-0.221816	0.000954341	F-box/WD repeat-containing protein 5%2C transcript variant X1
XM_019917091.1	NW_017851087.1	3638.51	-0.23005	0.00546273	protein YIPF5
XM_019898196.1	NW_017851323.1	3182.21	-0.234662	0.00995595	5'-3' exoribonuclease 2 homolog
XM_019917081.1	NW_017851087.1	2962.31	-0.235277	0.0060575	centrosome-associated zinc finger protein CP190
XM_019917089.1	NW_017851087.1	2156.85	-0.244858	0.00926989	cysteine desulfurase%2C mitochondrial
XM_019906346.1	NW_017852082.1	1417.83	-0.252966	0.00326737	protein hook
XM_019902542.1	NW_017852012.1	5732.41	-0.259698	0.00404448	mothers against decapentaplegic homolog 3
XM_019909582.1	NW_017852166.1	3483.51	-0.261197	0.00834811	ADP-ribosylation factor 6
XM_019917259.1	NW_017851131.1	751.278	-0.261794	0.00609179	GA-binding protein subunit beta-2%2C transcript variant X1
XM_019909746.1	NW_017852166.1	4919.83	-0.264008	0.000484405	AP-2 complex subunit alpha%2C transcript variant X1
XM_019913529.1	NW_017852339.1	2473.07	-0.264794	0.00834811	SH3 domain-containing RING finger protein 3%2C transcript variant X1
XM_019906717.1	NW_017852086.1	6647.2	-0.264931	0.00179837	uncharacterized LOC109539114%2C transcript variant X1
XM_019902602.1	NW_017852012.1	3915.1	-0.270012	0.00570316	glycine-rich cell wall structural protein 1.8-like%2C transcript variant X1
XM_019912614.1	NW_017852309.1	3666.86	-0.276991	0.00457413	uncharacterized LOC109543087%2C transcript variant X1
XM_019916405.1	NW_017852382.1	7247.66	-0.287913	0.00220772	pre-mRNA-processing factor 39
XM_019909373.1	NW_017852166.1	1046.79	-0.293346	0.00936126	protein DENND6A%2C transcript variant X1
XM_019906660.1	NW_017852086.1	4590.21	-0.293869	0.00377075	cyclin-G-associated kinase%2C transcript variant X1
XM_019905295.1	NW_017852061.1	2460.22	-0.300225	0.000450612	uncharacterized protein CG5098%2C transcript variant X1
XM_019916506.1	NW_017852382.1	3178.87	-0.301222	0.000208733	BTB/POZ domain-containing protein 9%2C transcript variant X1
XM_019909593.1	NW_017852166.1	1431.47	-0.301728	0.00390261	dual specificity mitogen-activated protein kinase kinase dSOR1%2C transcript variant X1
XM_019902359.1	NW_017852012.1	593.472	-0.302083	0.00813886	DNA polymerase epsilon catalytic subunit A
XM_019901039.1	NW_017851824.1	2940.33	-0.302222	0.00477544	vesicle-fusing ATPase 1
XM_019904525.1	NW_017852043.1	4240.14	-0.302542	0.00663315	zinc finger protein ubi-d4 B%2C transcript variant X1
XM_019915481.1	NW_017852371.1	5655.45	-0.304321	0.00701975	transmembrane emp24 domain-containing protein bai
XM_019904852.1	NW_017852056.1	929.532	-0.306507	0.00382437	putative DNA helicase Ino80%2C transcript variant X1
XM_019911879.1	NW_017852298.1	4316.7	-0.306513	0.000406495	THO complex subunit 2%2C transcript variant X1
XM_019917535.1	NW_017851160.1	1336.11	-0.307313	0.00899322	PEST proteolytic signal-containing nuclear protein-like%2C transcript variant X1
XM_019905711.1	NW_017852070.1	1496.95	-0.3088	0.00813886	GDNF-inducible zinc finger protein 1-like
XM_019908967.1	NW_017852126.1	501.446	-0.309081	0.00187929	synaptic vesicle 2-related protein
XM_019910643.1	NW_017852245.1	2701.07	-0.314102	0.00321135	probable 28S ribosomal protein S6%2C mitochondrial
XM_019911886.1	NW_017852298.1	1931.25	-0.314765	0.00817061	YLP motif-containing protein 1-like%2C transcript variant X1
XM_019915127.1	NW_017852369.1	3439.2	-0.318085	0.00355533	protein ABHD13%2C transcript variant X1
XM_019903814.1	NW_017852034.1	2313.85	-0.318296	0.00625453	DNA methyltransferase 1-associated protein 1
XM_019899290.1	NW_017851651.1	3830.02	-0.320235	0.00284834	COP9 signalosome complex subunit 2%2C transcript variant X1
XM_019911915.1	NW_017852300.1	1577.03	-0.320304	0.00300735	transcriptional regulator ATRX homolog
XM_019907338.1	NW_017852103.1	10543.4	-0.320986	0.00334452	kinesin heavy chain%2C transcript variant X1
XM_019913116.1	NW_017852328.1	6045.52	-0.323395	0.000196949	F-box only protein 28-like%2C transcript variant X1
XM_019915936.1	NW_017852380.1	11160.2	-0.326179	0.00195807	forkhead box protein K1%2C transcript variant X1
XM_019911261.1	NW_017852263.1	3962.29	-0.329404	0.00232081	septin-1
XM_019918218.1	NW_017851209.1	2879.36	-0.329495	0.00902335	TATA element modulatory factor%2C transcript variant X1
XM_019908789.1	NW_017852124.1	2057.95	-0.329677	0.00701134	coronin-7%2C transcript variant X1
XM_019908471.1	NW_017852115.1	1377.44	-0.332012	0.00303763	zinc finger protein 239-like%2C transcript variant X1
XM_019916081.1	NW_017852381.1	2816.24	-0.334658	0.000368533	DNA-directed RNA polymerase II subunit RPB2%2C transcript variant X1
XM_019899043.1	NW_017851628.1	390.005	-0.341238	0.00626079	NF-kappa-B inhibitor-interacting Ras-like protein%2C transcript variant X1
XM_019912871.1	NW_017852315.1	1026.3	-0.341389	0.00908157	stromal interaction molecule homolog
XM_019899578.1	NW_017851686.1	1897.35	-0.342711	0.00734212	transcription initiation factor TFIID subunit 2
XM_019915839.1	NW_017852380.1	5873.36	-0.344518	0.00992384	protein transport protein Sec31A
XM_019907628.1	NW_017852104.1	4207.05	-0.344607	0.0062234	F-box/LRR-repeat protein 6
XM_019904361.1	NW_017852038.1	6634.9	-0.344755	0.00270762	chromodomain-helicase-DNA-binding protein 7-like%2C transcript variant X1
XM_019917791.1	NW_017851174.1	5317.36	-0.345169	0.00908423	1-acyl-sn-glycerol-3-phosphate acyltransferase gamma-like
XM_019915861.1	NW_017852380.1	5402.64	-0.346719	0.00126508	fatty-acid amide hydrolase 2
XM_019904029.1	NW_017852037.1	4506.6	-0.349154	0.00792174	hsp90 co-chaperone Cdc37
XM_019913219.1	NW_017852330.1	3853.36	-0.349442	0.00033349	ATP-dependent RNA helicase bel-like
XM_019901011.1	NW_017851824.1	2991.56	-0.350229	9.05e-05	cell cycle control protein 50A%2C transcript variant X1
XM_019899346.1	NW_017851651.1	3792.98	-0.350849	0.00135266	potential E3 ubiquitin-protein ligase ariadne-1-like
XM_019899123.1	NW_017851640.1	2737.32	-0.351032	0.000202651	gastrula zinc finger protein XlCGF57.1-like
XM_019905719.1	NW_017852070.1	3456.43	-0.351572	0.00292547	DENN domain-containing protein 5B
XM_019909479.1	NW_017852166.1	7283.74	-0.353358	0.00293154	hrp65 protein-like%2C transcript variant X1
XM_019904218.1	NW_017852037.1	3808.05	-0.353662	0.00348402	FACT complex subunit spt16
XM_019903184.1	NW_017852021.1	2319.2	-0.353698	0.0032204	zinc finger protein 335-like
XM_019914215.1	NW_017852355.1	5197.22	-0.354989	0.00643509	selenide%2C water dikinase
XM_019908616.1	NW_017852117.1	3440.5	-0.355615	0.00324546	signal transducer and activator of transcription 5B%2C transcript variant X1
XM_019899989.1	NW_017846980.1	1682.06	-0.358275	0.00748305	myc box-dependent-interacting protein 1-like
XM_019916149.1	NW_017852381.1	3004.81	-0.358944	0.00471463	serine/threonine-protein kinase tousled-like 2%2C transcript variant X1
XM_019909205.1	NW_017852153.1	3689.01	-0.360481	0.00174175	zinc transporter 9
XM_019898416.1	NW_017851411.1	55180.4	-0.360959	0.00472126	peptidyl-prolyl cis-trans isomerase
XM_019898134.1	NW_017851295.1	1209.59	-0.361466	0.00708849	uncharacterized LOC109532970
XM_019902210.1	NW_017852003.1	6660.12	-0.362432	0.00970362	pre-mRNA-processing-splicing factor 8
XM_019909660.1	NW_017852166.1	6404.65	-0.363034	0.00124633	IQ motif and SEC7 domain-containing protein 1%2C transcript variant X1
XM_019912892.1	NW_017852320.1	1778.66	-0.363599	0.00394278	UV radiation resistance-associated gene protein%2C transcript variant X1
XM_019903499.1	NW_017848011.1	627.262	-0.363953	0.0022168	putative U5 small nuclear ribonucleoprotein 200 kDa helicase
XM_019914209.1	NW_017845759.1	561.3	-0.365288	0.00431042	ras-interacting protein RIP3-like
XM_019907295.1	NW_017852102.1	1939.69	-0.367067	0.00164785	CD82 antigen-like%2C transcript variant X1
XM_019909478.1	NW_017852166.1	4403.34	-0.36789	0.0027319	cytoplasmic FMR1-interacting protein
LOC109535006	NW_017851816.1	970.221	-0.367893	0.00795049	none
XM_019906681.1	NW_017852086.1	1521.07	-0.369219	0.00904604	sphingosine-1-phosphate phosphatase 1-like%2C transcript variant X1
XM_019907863.1	NW_017852107.1	11497.5	-0.37026	0.00517438	E3 ubiquitin-protein ligase UBR5%2C transcript variant X1
XM_019901456.1	NW_017851898.1	7359.9	-0.371495	0.00638689	oxysterol-binding protein 1%2C transcript variant X1
XM_019901929.1	NW_017851949.1	2610.86	-0.371766	0.000526337	brain protein I3-like
XR_002171533.1	NW_017846663.1	351.72	-0.372164	0.00598461	uncharacterized LOC109533522
XM_019899904.1	NW_017851724.1	3255.48	-0.372487	0.00442886	putative leucine-rich repeat-containing protein DDB_G0290503
XM_019914568.1	NW_017850075.1	1078.49	-0.373619	0.00552761	uncharacterized LOC109544420%2C transcript variant X1
XM_019902373.1	NW_017852012.1	4025.11	-0.374539	0.00756769	protein SEC13 homolog
XM_019915925.1	NW_017852380.1	7439.21	-0.375898	1.38e-05	putative RNA-binding protein Luc7-like 2%2C transcript variant X1
XM_019901684.1	NW_017851937.1	2641.6	-0.37891	8.97e-05	zinc finger protein 569-like%2C transcript variant X1
XM_019914434.1	NW_017852360.1	2785.38	-0.379433	4.9e-05	guanine nucleotide-binding protein G(s) subunit alpha%2C transcript variant X1
XM_019905344.1	NW_017848613.1	1115.54	-0.379568	0.00128224	uncharacterized LOC109538200
XM_019911330.1	NW_017852267.1	3413.18	-0.379646	0.00688784	active breakpoint cluster region-related protein
XM_019908938.1	NW_017852126.1	737.089	-0.381465	0.00698413	dystrobrevin beta-like%2C transcript variant X1
XM_019903700.1	NW_017852030.1	3322.3	-0.383813	0.000466873	protein PAT1 homolog 1
XM_019903311.1	NW_017852026.1	1963.82	-0.383852	0.00892147	molybdopterin synthase catalytic subunit%2C transcript variant X1
XM_019915550.1	NW_017852374.1	2592.01	-0.385657	0.000758556	uncharacterized LOC109545060%2C transcript variant X1
XM_019905489.1	NW_017852064.1	996.522	-0.38706	0.00934355	uncharacterized LOC109538312
XM_019910343.1	NW_017852199.1	2194.38	-0.387606	0.00016376	ras association domain-containing protein 4-like
XM_019900906.1	NW_017851823.1	598.726	-0.388643	0.00482137	pollen-specific leucine-rich repeat extensin-like protein 1%2C transcript variant X1
XM_019909015.1	NW_017852127.1	2920.86	-0.391032	9.4e-05	mannose-6-phosphate isomerase
XM_019910655.1	NW_017852245.1	5328.82	-0.391426	0.000372061	histone deacetylase Rpd3%2C transcript variant X1
XM_019901688.1	NW_017851937.1	1564.8	-0.392424	0.000507154	zinc finger protein 2 homolog
XM_019907350.1	NW_017852103.1	6138.95	-0.392478	0.00695788	histone-lysine N-methyltransferase 2E%2C transcript variant X1
XM_019915852.1	NW_017852380.1	708.276	-0.392712	0.00733515	protein aveugle
XM_019909360.1	NW_017852166.1	1149.82	-0.393018	1.98e-05	pyruvate dehydrogenase phosphatase regulatory subunit%2C mitochondrial-like%2C transcript variant X1
XM_019916763.1	NW_017850671.1	8401.12	-0.394782	0.000321568	spectrin beta chain-like
XM_019911281.1	NW_017852265.1	5796.93	-0.395286	0.000174097	WW domain-binding protein 2
XM_019898982.1	NW_017851612.1	2880.67	-0.395338	0.00017891	superkiller viralicidic activity 2-like 2
XM_019904751.1	NW_017852055.1	2995.02	-0.395636	0.004801	RING finger protein unkempt
XM_019900152.1	NW_017851737.1	10067.6	-0.396998	0.00051987	CCR4-NOT transcription complex subunit 1%2C transcript variant X1
XM_019904286.1	NW_017852037.1	2714.44	-0.397032	0.00180128	uncharacterized LOC109537512
XM_019916077.1	NW_017852381.1	3330.9	-0.398011	0.0063378	rho guanine nucleotide exchange factor 5%2C transcript variant X1
XM_019902034.1	NW_017847645.1	1530.06	-0.398054	0.00698413	probable phospholipid-transporting ATPase VD
XM_019898482.1	NW_017851442.1	10108.8	-0.398525	0.00014855	uncharacterized LOC109533219
XM_019909998.1	NW_017852168.1	12570.1	-0.398884	0.000244866	thymosin beta%2C transcript variant X1
XM_019908373.1	NW_017852115.1	3720.77	-0.400687	0.00484063	dedicator of cytokinesis protein 4
XM_019902450.1	NW_017852012.1	1448.83	-0.401736	0.000698288	myosin-I heavy chain%2C transcript variant X1
XM_019900126.1	NW_017851737.1	10395.7	-0.401837	0.00184824	transmembrane protein 184B%2C transcript variant X1
XM_019914145.1	NW_017852350.1	528.598	-0.402491	0.00987227	zinc finger protein 43-like
XM_019914558.1	NW_017852366.1	7108.27	-0.40254	0.00987227	protein split ends%2C transcript variant X1
XM_019906249.1	NW_017852082.1	1186.2	-0.403578	0.00105074	coiled-coil domain-containing protein 94
XM_019903487.1	NW_017848008.1	1638.55	-0.404839	0.00766983	probable phospholipid-transporting ATPase VA
XM_019898179.1	NW_017851318.1	11743.6	-0.405288	0.00329088	pleckstrin homology-like domain family B member 1%2C transcript variant X1
XM_019913521.1	NW_017852339.1	2340.98	-0.406023	0.00226211	NEDD8 ultimate buster 1-like
XM_019913278.1	NW_017852336.1	2553.82	-0.406151	0.00377113	rho guanine nucleotide exchange factor 18%2C transcript variant X1
XM_019915151.1	NW_017852369.1	27183.7	-0.406674	0.00442478	cold shock domain-containing protein E1
XM_019907771.1	NW_017852106.1	5361.94	-0.409649	0.00535816	protein crumbs%2C transcript variant X1
XM_019915887.1	NW_017852380.1	3355.76	-0.412226	0.000196949	uncharacterized LOC109545289%2C transcript variant X1
XM_019902979.1	NW_017852017.1	4148.16	-0.412642	0.0023635	nuclear RNA export factor 1-like
XM_019915096.1	NW_017852369.1	34007	-0.415757	0.00547645	ATP-dependent RNA helicase p62-like
XM_019910980.1	NW_017852254.1	32272	-0.418222	0.0034156	activating transcription factor of chaperone%2C transcript variant X1
XM_019906218.1	NW_017852082.1	2685.53	-0.418685	0.000615078	HEAT repeat-containing protein 6%2C transcript variant X1
XM_019912239.1	NW_017852302.1	1102.07	-0.419423	0.00636244	serine/threonine-protein kinase GD17699
XM_019905610.1	NW_017852067.1	3196.9	-0.420601	0.0020456	uncharacterized LOC109538396%2C transcript variant X1
XM_019916552.1	NW_017852383.1	1966.38	-0.421739	0.00581696	uncharacterized LOC109545713%2C transcript variant X1
XM_019900150.1	NW_017851737.1	1445.53	-0.421821	0.0021884	bladder cancer-associated protein
XM_019904952.1	NW_017852056.1	2458.01	-0.422024	0.00847362	round spermatid basic protein 1-like protein
XM_019901914.1	NW_017851949.1	7126.23	-0.422591	0.000625071	E3 ubiquitin-protein ligase znrf1%2C transcript variant X1
XM_019916981.1	NW_017851084.1	1862.98	-0.423597	0.00428171	guanine nucleotide-releasing factor 2%2C transcript variant X1
XM_019900500.1	NW_017847165.1	10092.8	-0.424183	0.000126815	spectrin beta chain-like
XM_019897816.1	NW_017851241.1	2851.21	-0.425981	0.00284796	phosphatidylinositol 4-kinase beta
XM_019917755.1	NW_017851174.1	19211.5	-0.426303	0.00958727	tensin-1%2C transcript variant X1
XM_019899968.1	NW_017851724.1	24667	-0.426694	0.00210709	serine/threonine-protein kinase MARK2-like%2C transcript variant X1
XM_019915746.1	NW_017852378.1	1830.41	-0.427288	0.00240334	probable cation-transporting ATPase 13A3
XM_019900424.1	NW_017851769.1	10443.3	-0.428018	0.000111964	spectrin beta chain-like
XM_019909590.1	NW_017852166.1	4438.35	-0.428459	0.000363649	lysine-specific demethylase lid%2C transcript variant X1
XM_019910560.1	NW_017852239.1	2832.82	-0.430136	0.000422563	cyclin-T%2C transcript variant X1
XM_019905542.1	NW_017852064.1	4372.35	-0.430337	0.00213928	retinal dehydrogenase 1
XM_019898136.1	NW_017851300.1	1316.85	-0.430799	0.00245456	uncharacterized LOC109532972%2C transcript variant X1
XM_019901858.1	NW_017851946.1	924.336	-0.431533	0.00438133	zinc finger protein 239-like
XM_019912608.1	NW_017852309.1	408.936	-0.433956	0.0056416	zinc finger protein OZF-like
XM_019902360.1	NW_017852012.1	1420.55	-0.436425	0.00211541	uncharacterized LOC109536244%2C transcript variant X1
XM_019900878.1	NW_017851821.1	658.259	-0.436512	0.00021224	uncharacterized LOC109535061
XM_019907509.1	NW_017852103.1	3238.35	-0.436904	0.00181149	sorting nexin-29-like
XM_019915767.1	NW_017852380.1	3176.87	-0.438702	0.000415649	E3 ubiquitin-protein ligase SMURF1%2C transcript variant X1
XM_019910727.1	NW_017852245.1	3634.11	-0.439454	0.00701134	DNA excision repair protein haywire
XM_019902047.1	NW_017851977.1	4454.78	-0.439785	0.00096006	serine/arginine-rich splicing factor 7-like%2C transcript variant X1
XM_019900738.1	NW_017851812.1	3497.68	-0.441966	0.00239959	RNA polymerase-associated protein CTR9 homolog
XM_019906819.1	NW_017852091.1	826.195	-0.442113	0.00417664	T-cell activation inhibitor%2C mitochondrial%2C transcript variant X1
XM_019904733.1	NW_017852055.1	7958.88	-0.442811	0.00174119	dyslexia-associated protein KIAA0319-like protein
XM_019916509.1	NW_017852382.1	5415.05	-0.445392	0.00995541	non-canonical poly(A) RNA polymerase PAPD5-like%2C transcript variant X1
XM_019917974.1	NW_017851181.1	1444.62	-0.446404	0.000185791	ATP-dependent DNA helicase Q5-like
XM_019902427.1	NW_017852012.1	3315.45	-0.447412	0.00108012	bromodomain adjacent to zinc finger domain protein 2B%2C transcript variant X1
XM_019916849.1	NW_017850834.1	944.629	-0.447646	0.00330841	protein lap4-like
XM_019914962.1	NW_017852366.1	959.656	-0.449444	0.00787948	protein deltex
XM_019910516.1	NW_017852235.1	935.793	-0.450274	0.00393088	integrator complex subunit 6-B-like
XM_019900783.1	NW_017851814.1	11425.1	-0.450552	0.00534325	E3 ubiquitin-protein ligase UBR2
XM_019899585.1	NW_017851686.1	880.355	-0.45073	0.00260278	TOX high mobility group box family member 3-like
XM_019916258.1	NW_017852381.1	2774.84	-0.450932	0.00130105	uncharacterized LOC109545511
XM_019899268.1	NW_017851651.1	1342.44	-0.451506	0.00688784	protein capicua homolog%2C transcript variant X1
XM_019900349.1	NW_017851758.1	2269.62	-0.45157	0.00218969	transcriptional adapter 2B-like%2C transcript variant X1
XM_019905280.1	NW_017852061.1	2201.12	-0.45462	0.00403617	rap1 GTPase-GDP dissociation stimulator 1-B
XM_019909077.1	NW_017852128.1	2752.64	-0.455016	0.00399113	TIMELESS-interacting protein
XM_019902045.1	NW_017851977.1	4471.91	-0.455126	0.000688807	serine/arginine-rich splicing factor 7-like%2C transcript variant X1
XM_019903594.1	NW_017852030.1	1838.26	-0.455304	0.00398183	PP2C-like domain-containing protein CG9801%2C transcript variant X1
XM_019899063.1	NW_017851632.1	645.781	-0.455445	0.000864121	threonine aspartase 1
XM_019898118.1	NW_017851291.1	2811.1	-0.455979	0.000551681	cyclin-K-like
XM_019910290.1	NW_017852191.1	5210.71	-0.459303	1.27e-05	putative U5 small nuclear ribonucleoprotein 200 kDa helicase
XM_019915204.1	NW_017850216.1	1632.41	-0.460314	3.82e-06	ragulator complex protein LAMTOR1
XM_019904332.1	NW_017852038.1	2608.79	-0.46044	0.00597286	muscleblind-like protein 2a
XM_019916450.1	NW_017852382.1	3295.68	-0.461082	0.00195807	BSD domain-containing protein 1-A-like%2C transcript variant X1
XM_019911669.1	NW_017852286.1	332.993	-0.461609	0.00376821	uncharacterized LOC109542445
XM_019899295.1	NW_017851651.1	1888.52	-0.461848	0.00264765	solute carrier organic anion transporter family member 5A1-like
XM_019909607.1	NW_017849264.1	825.524	-0.462564	0.00322066	protein lap4-like
XM_019916674.1	NW_017850504.1	526.123	-0.462996	0.00358325	uncharacterized LOC109545832
XM_019908369.1	NW_017852115.1	4713.24	-0.464298	0.00402584	neuropathy target esterase sws
XM_019898163.1	NW_017851313.1	4572.04	-0.464601	0.000407942	serine/arginine-rich splicing factor 7-like%2C transcript variant X1
XM_019899593.1	NW_017851689.1	1611.77	-0.464755	9.46e-06	zinc finger protein 569%2C transcript variant X1
XM_019901213.1	NW_017851842.1	1738.96	-0.466178	0.000931375	uncharacterized LOC109535327%2C transcript variant X1
XM_019914321.1	NW_017850023.1	4040.5	-0.467094	1.85e-05	putative U5 small nuclear ribonucleoprotein 200 kDa helicase
XM_019909889.1	NW_017852166.1	2101.29	-0.467228	0.00187435	vinexin-like
XM_019914172.1	NW_017852353.1	3554.06	-0.467422	7.51e-05	prefoldin subunit 2
XM_019906902.1	NW_017852091.1	1885.5	-0.469042	0.00361935	D-glucuronyl C5-epimerase%2C transcript variant X1
XM_019910620.1	NW_017852245.1	6021.81	-0.469326	0.000850838	nuclear pore complex protein Nup153
XM_019912369.1	NW_017852304.1	5641.35	-0.469696	0.00141991	apoptosis-resistant E3 ubiquitin protein ligase 1%2C transcript variant X1
XM_019900638.1	NW_017851783.1	2069.15	-0.470092	3.98e-06	serine/threonine-protein phosphatase 4 regulatory subunit 3%2C transcript variant X1
XM_019912645.1	NW_017852311.1	4727.24	-0.470434	9.4e-05	structural maintenance of chromosomes protein 3
XM_019918071.1	NW_017851187.1	2689.89	-0.473415	0.000309725	activin receptor type-1%2C transcript variant X1
XM_019905136.1	NW_017852058.1	2174.64	-0.473438	0.00122886	RING finger and SPRY domain-containing protein 1-like
XM_019904010.1	NW_017852037.1	1835.44	-0.473763	0.00114802	uncharacterized LOC109537347%2C transcript variant X1
XM_019904373.1	NW_017852038.1	2133.04	-0.476633	0.000363404	insulin-like growth factor 2 mRNA-binding protein 1%2C transcript variant X1
XM_019904814.1	NW_017852056.1	3301.31	-0.477557	0.0091855	HEAT repeat-containing protein 5B%2C transcript variant X1
XR_002172611.1	NW_017852369.1	1083.25	-0.477908	0.00196418	uncharacterized LOC109544819
XM_019904008.1	NW_017852037.1	1654.83	-0.479611	0.00200183	zinc finger protein 665-like
XM_019900533.1	NW_017851775.1	13885.1	-0.479981	2.08e-06	tetratricopeptide repeat protein 14 homolog%2C transcript variant X1
XM_019912447.1	NW_017852305.1	3386.84	-0.481574	0.00397495	protein retinal degeneration B
XM_019904477.1	NW_017848363.1	4064.93	-0.483815	0.00908423	uncharacterized LOC109537663
XM_019904560.1	NW_017848364.1	4064.93	-0.483815	0.00908423	uncharacterized LOC109537703
XM_019913683.1	NW_017852342.1	2568.78	-0.484558	0.00851084	homeobox protein homothorax%2C transcript variant X1
XM_019906667.1	NW_017852086.1	2648.74	-0.486076	0.00134628	uncharacterized LOC109539073%2C transcript variant X1
XM_019910109.1	NW_017852173.1	4946.99	-0.486805	0.000105891	ankyrin repeat domain-containing protein 12%2C transcript variant X1
XM_019908264.1	NW_017852110.1	3270.97	-0.486861	0.00872141	protein phosphatase inhibitor 2-like
XM_019898115.1	NW_017851288.1	1489.18	-0.487092	0.00141914	uncharacterized LOC109532958
XM_019911649.1	NW_017852280.1	1850.99	-0.487218	0.00792319	E3 ubiquitin-protein ligase RNF38-like
XM_019910508.1	NW_017852235.1	703.454	-0.491241	0.00386843	integrator complex subunit 6-like
XM_019907922.1	NW_017852107.1	1497.18	-0.49254	0.00203483	zinc finger protein 335-like
XM_019903841.1	NW_017852034.1	3027.83	-0.492745	8.15e-06	AT-rich interactive domain-containing protein 4B%2C transcript variant X1
XM_019910584.1	NW_017849390.1	10561.9	-0.49321	2.08e-06	transmembrane protein 53%2C transcript variant X1
XM_019901536.1	NW_017851923.1	4670.5	-0.493454	2.27e-06	striatin-3
XM_019911403.1	NW_017852267.1	289.493	-0.493491	0.00871437	protein bric-a-brac 2-like
XM_019901973.1	NW_017851955.1	615.833	-0.493947	0.00143378	zinc finger protein 678-like
XM_019917632.1	NW_017851170.1	3513.14	-0.494121	0.00670526	probable RNA methyltransferase bin3%2C transcript variant X1
XM_019914565.1	NW_017852366.1	831.261	-0.49423	0.00361606	msx2-interacting protein-like%2C transcript variant X1
XM_019900100.1	NW_017851729.1	615.249	-0.494256	0.0013387	zinc finger protein 678-like
XM_019912411.1	NW_017852305.1	17738.3	-0.494605	0.00131588	clathrin heavy chain
XM_019911716.1	NW_017852289.1	2484	-0.495271	0.00801019	uncharacterized LOC109542474
XM_019913145.1	NW_017852328.1	428.543	-0.495639	0.00268807	uncharacterized LOC109543432
XM_019899556.1	NW_017851680.1	4786.77	-0.497369	0.0087307	probable serine/threonine-protein kinase ndrD%2C transcript variant X1
XM_019910875.1	NW_017849423.1	1742.98	-0.497374	0.00666658	E3 ubiquitin-protein ligase UBR1-like
XM_019903663.1	NW_017852030.1	449.039	-0.497502	0.00701588	transmembrane protein 170A
XM_019911021.1	NW_017852256.1	6157.05	-0.498184	0.00471463	splicing factor 3B subunit 1%2C transcript variant X1
XM_019900929.1	NW_017851823.1	2231.36	-0.498511	7.48e-08	high mobility group protein 20A-like
XM_019901388.1	NW_017851876.1	1178.98	-0.499163	0.00127651	protein lap4-like
XM_019903540.1	NW_017852030.1	1914.21	-0.499996	0.00560535	N(G)%2CN(G)-dimethylarginine dimethylaminohydrolase 1
XM_019901555.1	NW_017851924.1	7259.14	-0.501372	0.00234347	eukaryotic translation initiation factor 4 gamma 2-like
XM_019906221.1	NW_017852082.1	5749.23	-0.501656	0.00987227	la-related protein 4B%2C transcript variant X1
XM_019904647.1	NW_017852049.1	5975.32	-0.501729	0.000473335	phosphoacetylglucosamine mutase
XM_019909324.1	NW_017852162.1	3687.1	-0.502305	0.00776768	serine/threonine-protein kinase minibrain-like
XM_019909712.1	NW_017852166.1	5356.22	-0.502322	0.00703445	alpha-soluble NSF attachment protein%2C transcript variant X1
XM_019898962.1	NW_017851612.1	2763.35	-0.503045	0.000490392	multidrug resistance-associated protein 1%2C transcript variant X1
XM_019917400.1	NW_017851152.1	5013.41	-0.503111	0.00794793	ATP-binding cassette sub-family D member 2%2C transcript variant X1
XM_019912521.1	NW_017849658.1	761.03	-0.503551	0.00161087	uncharacterized LOC109543010
XM_019902994.1	NW_017852017.1	5747.23	-0.503709	0.00088335	transcription elongation factor SPT6
XM_019901737.1	NW_017851937.1	2431.91	-0.504008	8.97e-05	rho GTPase-activating protein 190
XM_019908597.1	NW_017852117.1	827.127	-0.504449	5.58e-05	U4/U6.U5 small nuclear ribonucleoprotein 27 kDa protein-like%2C transcript variant X1
XM_019912661.1	NW_017852311.1	2939.03	-0.504568	0.000620055	peroxisomal membrane protein 11C
XM_019901421.1	NW_017851883.1	883.651	-0.504916	0.0045462	polyprenol reductase-like
XM_019908426.1	NW_017852115.1	750.604	-0.505815	0.00617057	syntaxin-binding protein 5-like
XM_019912449.1	NW_017852305.1	2362.19	-0.505892	5.01e-05	ATP-dependent RNA helicase dbp2-like
XM_019917469.1	NW_017851157.1	6413.36	-0.507125	0.000143297	translation initiation factor IF-2-like
XM_019900745.1	NW_017851813.1	4153.41	-0.507698	0.0025343	protein kibra
XM_019916464.1	NW_017852382.1	2347.71	-0.508368	0.00175032	DNA-directed RNA polymerase III subunit RPC7
XM_019917301.1	NW_017851136.1	6267.59	-0.508899	0.000126876	EH domain-binding protein 1%2C transcript variant X1
XM_019917345.1	NW_017851138.1	825.609	-0.509733	0.0014955	uncharacterized LOC109546394%2C transcript variant X1
XM_019915414.1	NW_017852371.1	2724.22	-0.509848	1.23e-06	protein daughterless%2C transcript variant X1
XM_019910895.1	NW_017852250.1	484.833	-0.511181	0.00299072	RNA-binding protein Musashi homolog Rbp6-like%2C transcript variant X1
XM_019899163.1	NW_017851647.1	2030.56	-0.511231	4.21e-05	uncharacterized LOC109533758%2C transcript variant X1
XM_019898338.1	NW_017846528.1	2031.95	-0.512118	4.23e-05	uncharacterized LOC109533104%2C transcript variant X1
XM_019914944.1	NW_017852366.1	10188.8	-0.512318	0.00244313	glutaredoxin-C4-like%2C transcript variant X1
XM_019916776.1	NW_017845868.1	680.173	-0.512922	0.00188387	uncharacterized LOC109545931
XM_019900332.1	NW_017851755.1	4956.97	-0.513189	0.00252873	ubiquitin-like protein 3
XM_019904896.1	NW_017852056.1	7453.35	-0.514804	9.46e-06	transcriptional coactivator YAP1-A%2C transcript variant X1
XM_019917120.1	NW_017851087.1	7988.55	-0.514859	0.00117922	actin-binding LIM protein 1
XM_019901412.1	NW_017851883.1	6844.38	-0.515244	2.81e-06	CREB-binding protein%2C transcript variant X1
XM_019909418.1	NW_017852166.1	926.374	-0.515292	0.00889409	vegetative cell wall protein gp1-like
XM_019906252.1	NW_017852082.1	949.392	-0.515492	0.00681454	SOSS complex subunit B homolog%2C transcript variant X1
XM_019910046.1	NW_017852172.1	447.592	-0.515587	0.00478606	uncharacterized LOC109541246
XM_019908361.1	NW_017852111.1	1969.02	-0.516914	0.00359924	NCK-interacting protein with SH3 domain-like
XM_019906140.1	NW_017852075.1	2179.92	-0.517624	0.000555288	protein phosphatase 1 regulatory subunit 14B
XM_019909743.1	NW_017852166.1	12736.1	-0.517804	3.35e-05	syndecan%2C transcript variant X1
XM_019909426.1	NW_017852166.1	3945.59	-0.517806	1.16e-07	trafficking protein particle complex subunit 8
XM_019910446.1	NW_017852220.1	1719.15	-0.518017	9.81e-06	slit homolog 3 protein-like
XM_019916912.1	NW_017850947.1	1568.78	-0.5193	0.00073509	zinc finger protein 99-like%2C transcript variant X1
XM_019917376.1	NW_017851142.1	1568.85	-0.519391	0.00073176	zinc finger protein 99-like%2C transcript variant X1
XM_019910123.1	NW_017852175.1	9489.69	-0.519749	0.000714704	protein TIS11-like%2C transcript variant X1
XM_019907874.1	NW_017852107.1	10010	-0.51979	9.99e-06	FERM%2C RhoGEF and pleckstrin domain-containing protein 2%2C transcript variant X1
XM_019911790.1	NW_017852296.1	3584.86	-0.519834	0.000405424	uncharacterized LOC109542535%2C transcript variant X1
XM_019912607.1	NW_017852309.1	1493.09	-0.519913	0.00190665	esterase AGAP003155
XM_019910924.1	NW_017852254.1	1826.23	-0.522831	0.000450612	transcription initiation factor TFIID subunit 4%2C transcript variant X1
XM_019910844.1	NW_017849417.1	7177.74	-0.523532	0.000540575	protein TIS11-like
XM_019902553.1	NW_017852012.1	2461.13	-0.524008	0.000355253	RE1-silencing transcription factor-like
XM_019908521.1	NW_017852115.1	625.282	-0.524525	0.00492647	ATP-binding cassette sub-family G member 5
XM_019910677.1	NW_017852245.1	1359.55	-0.524765	0.000725223	serine/Arginine-related protein 53
XM_019909356.1	NW_017852166.1	4686.84	-0.52512	4.35e-06	phosphatidylinositol 3-kinase regulatory subunit alpha%2C transcript variant X1
XM_019904002.1	NW_017852037.1	4874.78	-0.525838	0.00236577	acyl-coenzyme A thioesterase 9%2C mitochondrial-like
XM_019916408.1	NW_017852382.1	2666.96	-0.526826	0.00143751	enhancer of polycomb homolog 1
XM_019902022.1	NW_017851975.1	3436.94	-0.527638	0.00824288	neurogenic protein mastermind-like
XM_019910367.1	NW_017852201.1	7105.83	-0.528053	0.00121015	dynamin%2C transcript variant X1
XM_019909367.1	NW_017852166.1	3363.47	-0.530566	7.3e-05	SAFB-like transcription modulator
XM_019907433.1	NW_017852103.1	4590.21	-0.531105	0.00558304	partitioning defective 3 homolog%2C transcript variant X1
XM_019907453.1	NW_017852103.1	3801.11	-0.531461	0.000405248	dnaJ homolog dnj-5
XM_019903693.1	NW_017852030.1	1847.71	-0.532029	9.56e-08	ankyrin repeat domain-containing protein 50%2C transcript variant X1
XM_019898740.1	NW_017851531.1	7317.82	-0.532041	0.00541256	guanine nucleotide-binding protein subunit beta-like protein 1
XM_019900307.1	NW_017851751.1	1255.16	-0.532104	5.39e-07	uncharacterized LOC109534589%2C transcript variant X1
XM_019906403.1	NW_017852083.1	13561.7	-0.532278	0.00444813	myosin heavy chain%2C non-muscle%2C transcript variant X1
XM_019917472.1	NW_017851157.1	40747.8	-0.534191	0.00431002	uncharacterized LOC109546494
XM_019901645.1	NW_017851937.1	1470.93	-0.534598	0.00104323	dosage compensation regulator
XM_019899670.1	NW_017851694.1	7782.25	-0.534672	1.15e-05	ran-binding protein 9
XM_019906813.1	NW_017852091.1	1864.03	-0.534956	0.00235312	neurogenic locus Notch protein
XM_019900031.1	NW_017851724.1	3925.81	-0.535012	0.00024873	rap guanine nucleotide exchange factor 6
XM_019911364.1	NW_017852267.1	1680.78	-0.535295	0.00513844	putative uncharacterized protein DDB_G0271606
XM_019905138.1	NW_017852058.1	1165.02	-0.535627	0.000960493	nuclear hormone receptor FTZ-F1%2C transcript variant X1
XM_019910679.1	NW_017852245.1	5128.07	-0.535957	6.37e-05	cyclin-dependent kinase 14%2C transcript variant X1
XM_019905174.1	NW_017852058.1	607.968	-0.536057	0.00239959	deformed epidermal autoregulatory factor 1%2C transcript variant X1
XM_019905005.1	NW_017852056.1	12831	-0.538387	0.00680826	translocon-associated protein subunit gamma
XM_019912200.1	NW_017852302.1	3363.38	-0.540186	0.00066178	high affinity copper uptake protein 1%2C transcript variant X1
XM_019916347.1	NW_017852381.1	5991.1	-0.542274	0.000292211	NECAP-like protein CG9132
XM_019910934.1	NW_017852254.1	2629.65	-0.543003	0.00876712	ATP-dependent RNA helicase dbp2-like
XM_019914030.1	NW_017852350.1	5021.83	-0.543342	0.00399754	putative inorganic phosphate cotransporter%2C transcript variant X1
XM_019902487.1	NW_017852012.1	1325.19	-0.544275	0.00483671	calbindin-32%2C transcript variant X1
XM_019911941.1	NW_017852300.1	2435.23	-0.54548	0.0005424	protein UBASH3A homolog%2C transcript variant X1
XR_002171544.1	NW_017845066.1	239.333	-0.546385	0.00557208	uncharacterized LOC109533559
XM_019914749.1	NW_017852366.1	1981.49	-0.546428	0.000266539	histone acetyltransferase KAT6B%2C transcript variant X1
XM_019900476.1	NW_017851775.1	4969.95	-0.546985	0.00445414	charged multivesicular body protein 1b
XM_019911458.1	NW_017849492.1	1676.4	-0.547564	0.00250055	phosphatidylinositol-binding clathrin assembly protein LAP-like
XM_019913834.1	NW_017849937.1	255.115	-0.547848	0.00207311	monocarboxylate transporter 12-B-like
XM_019911743.1	NW_017852293.1	1362.45	-0.548822	0.00211545	fizzy-related protein homolog
XM_019916366.1	NW_017852381.1	489.602	-0.549179	0.00399754	protein hairy-like
XM_019906696.1	NW_017852086.1	3279.92	-0.549656	0.000152664	regulator of G-protein signaling 11%2C transcript variant X1
XM_019903752.1	NW_017848132.1	256.289	-0.549741	0.00191206	monocarboxylate transporter 12-B-like
XM_019912090.1	NW_017849597.1	1303.87	-0.549763	0.0017268	serine/threonine-protein kinase minibrain-like
XM_019899853.1	NW_017851716.1	1266.86	-0.551586	0.00653675	neurogenic protein mastermind-like%2C transcript variant X1
XM_019900613.1	NW_017851783.1	257.977	-0.551778	0.00652937	uncharacterized LOC109534834
XM_019909891.1	NW_017852166.1	19986.2	-0.552196	0.00359924	translocon-associated protein subunit beta
XM_019898439.1	NW_017851439.1	4664.75	-0.553232	0.000684718	thyroid receptor-interacting protein 11-like%2C transcript variant X1
XM_019903023.1	NW_017852017.1	4669.02	-0.553317	0.00284796	bone morphogenetic protein receptor type-1B%2C transcript variant X1
XM_019911509.1	NW_017852270.1	353.564	-0.553774	0.00960787	leucine-rich repeat-containing protein 74A-like%2C transcript variant X1
XM_019917395.1	NW_017846084.1	838.218	-0.554832	0.00470636	eukaryotic translation initiation factor 4 gamma 2-like
XM_019908190.1	NW_017849022.1	182.333	-0.554903	0.00672653	PH domain-containing protein DDB_G0287875-like%2C transcript variant X1
XM_019911597.1	NW_017852279.1	1580.51	-0.554923	1.25e-05	sorting nexin-13-like%2C transcript variant X1
XM_019918083.1	NW_017851187.1	7552.46	-0.557348	7.33e-07	protein bicaudal D
XM_019900317.1	NW_017851753.1	5508.68	-0.558126	6.03e-07	maternal protein tudor-like%2C transcript variant X1
XM_019899439.1	NW_017851659.1	214.809	-0.558368	0.000658539	collagen alpha-1(XII) chain-like
XM_019910355.1	NW_017852201.1	1790.36	-0.559162	2.43e-05	histone-lysine N-methyltransferase 2C-like
XM_019908622.1	NW_017852117.1	1865.61	-0.559419	0.00666689	ral guanine nucleotide dissociation stimulator-like 1%2C transcript variant X1
XM_019916911.1	NW_017850947.1	2486.59	-0.561192	0.00180991	zinc finger MIZ domain-containing protein 1-like
XM_019917370.1	NW_017851142.1	2486.45	-0.561346	0.00180291	zinc finger MIZ domain-containing protein 1-like
XM_019916773.1	NW_017850703.1	2782.54	-0.561429	0.00198467	dynamin-like
XM_019905095.1	NW_017852058.1	3558.17	-0.561949	7.04e-05	activating transcription factor 7-interacting protein 1
XM_019916425.1	NW_017852382.1	10418	-0.563378	0.000901503	transmembrane protein 214-A
XM_019903042.1	NW_017852017.1	3229.02	-0.564106	0.00192417	zinc finger protein 665-like%2C transcript variant X1
XM_019905254.1	NW_017852059.1	5787.32	-0.564432	1.7e-05	heat shock protein 75 kDa%2C mitochondrial
XM_019912184.1	NW_017852302.1	6062.25	-0.565264	0.000136241	cytoplasmic dynein 1 intermediate chain%2C transcript variant X1
XM_019901316.1	NW_017851859.1	1454.43	-0.565444	0.00211887	queuine tRNA-ribosyltransferase accessory subunit 2%2C transcript variant X1
XM_019909311.1	NW_017852162.1	20057.7	-0.565762	0.00299423	sortilin-related receptor-like
XM_019902215.1	NW_017852003.1	4143.39	-0.565831	1.98e-05	suppressor of cytokine signaling 5%2C transcript variant X1
XM_019901972.1	NW_017851955.1	1119.89	-0.565923	0.000147915	uncharacterized LOC109535930
XM_019911421.1	NW_017849491.1	1926.73	-0.566023	0.00179814	phosphatidylinositol-binding clathrin assembly protein LAP-like
XM_019911734.1	NW_017852291.1	2633.53	-0.566245	0.00200165	dynamin-like
XM_019913188.1	NW_017852328.1	4397.18	-0.566355	0.000637605	tolloid-like protein 1
XM_019898928.1	NW_017851601.1	2173.26	-0.566742	0.00446646	tumor necrosis factor receptor superfamily member wengen-like%2C transcript variant X1
XM_019912344.1	NW_017852302.1	651.239	-0.566915	5.91e-06	protein NRDE2 homolog
XM_019902895.1	NW_017852017.1	6745.18	-0.568106	7.72e-07	autophagy-related protein 101%2C transcript variant X1
XM_019904141.1	NW_017852037.1	8538.01	-0.56935	0.00424657	uncharacterized LOC109537418%2C transcript variant X1
XM_019900805.1	NW_017851816.1	818.51	-0.569969	2.27e-05	nose resistant to fluoxetine protein 6-like%2C transcript variant X1
XM_019909637.1	NW_017852166.1	5604.83	-0.569988	2.8e-06	phospholipid scramblase 2%2C transcript variant X1
XM_019904139.1	NW_017852037.1	1232.6	-0.571944	5.05e-06	histone acetyltransferase KAT2B
XM_019910855.1	NW_017849418.1	1495.47	-0.572945	0.00645747	uncharacterized LOC109541856
XM_019903703.1	NW_017848106.1	1583.72	-0.573909	0.00781857	neurogenic protein mastermind-like
XM_019909096.1	NW_017852128.1	1125.33	-0.574302	8.71e-06	INO80 complex subunit D
XM_019903665.1	NW_017852030.1	2898.8	-0.574747	0.00132142	golgin subfamily A member 4%2C transcript variant X1
XM_019909929.1	NW_017852166.1	1450.21	-0.575768	0.00467769	toll-like receptor 2%2C transcript variant X1
XM_019904867.1	NW_017852056.1	3579.11	-0.575904	3.02e-05	zinc finger MYM-type protein 4%2C transcript variant X1
XM_019910598.1	NW_017852243.1	445.253	-0.575991	0.00606494	voltage-gated potassium channel subunit beta-2%2C transcript variant X1
XM_019900574.1	NW_017851775.1	1264.29	-0.576199	1.04e-05	sphingomyelin synthase-related 1-like
XM_019908920.1	NW_017852126.1	2819.19	-0.576313	0.000249897	oxysterol-binding protein-related protein 9%2C transcript variant X1
XM_019916059.1	NW_017852381.1	1302.62	-0.576983	1.22e-05	calmodulin-binding transcription activator 2-like
XM_019898358.1	NW_017846528.1	1041.68	-0.577274	0.00822823	DNA mismatch repair protein Mlh1-like%2C transcript variant X1
XM_019899165.1	NW_017851647.1	1041.53	-0.577563	0.00817154	DNA mismatch repair protein Mlh1-like%2C transcript variant X1
XM_019906364.1	NW_017852082.1	452.172	-0.57869	0.00141991	UDP-GlcNAc:betaGal beta-1%2C3-N-acetylglucosaminyltransferase-like protein 1%2C transcript variant X1
XR_002172754.1	NW_017846000.1	590.315	-0.579021	0.00876712	uncharacterized LOC109546291%2C transcript variant X1
XM_019903569.1	NW_017852030.1	4685.58	-0.579137	0.000454296	myelin regulatory factor-like protein%2C transcript variant X1
XM_019905885.1	NW_017852073.1	2119.75	-0.579143	0.00180128	dehydrogenase/reductase SDR family protein 7-like
XM_019907814.1	NW_017852106.1	4674.38	-0.580776	4.23e-07	serine/threonine-protein kinase Warts%2C transcript variant X1
XM_019911300.1	NW_017852265.1	824.519	-0.581147	0.000484405	phosphatidylinositol 3%2C4%2C5-trisphosphate 3-phosphatase and dual-specificity protein phosphatase PTEN%2C transcript variant X1
XM_019916060.1	NW_017852381.1	135.201	-0.581393	0.00596159	mucin-3B-like
XM_019904930.1	NW_017852056.1	3391.78	-0.583413	5.23e-05	dual specificity tyrosine-phosphorylation-regulated kinase 2%2C transcript variant X1
XM_019908353.1	NW_017852111.1	884.789	-0.583454	0.0017212	23 kDa integral membrane protein-like
XM_019901568.1	NW_017851926.1	4127.97	-0.584134	0.00973198	anoctamin-1-like%2C transcript variant X1
XM_019898556.1	NW_017851453.1	3505.31	-0.584305	0.000396059	zinc finger protein Noc-like
XM_019913030.1	NW_017852325.1	3479.47	-0.584928	0.00105404	zinc finger protein 608-like
XM_019905790.1	NW_017852073.1	2143.26	-0.585718	0.00214273	nuclear pore complex protein DDB_G0274915-like
XM_019903731.1	NW_017852030.1	1456.09	-0.586126	0.000131446	kelch-like protein 5%2C transcript variant X1
XM_019911169.1	NW_017852262.1	128.219	-0.586906	0.00144651	uncharacterized LOC109542111
XM_019901429.1	NW_017851888.1	2691.84	-0.587539	0.0023345	uncharacterized LOC109535517%2C transcript variant X1
XM_019901868.1	NW_017851946.1	651.742	-0.587914	9.51e-05	E3 SUMO-protein ligase RanBP2-like
XM_019910424.1	NW_017852214.1	1646.7	-0.588635	0.00180409	acyl-CoA Delta(11) desaturase-like%2C transcript variant X1
XM_019913186.1	NW_017852328.1	3865.9	-0.588805	3.81e-05	heterogeneous nuclear ribonucleoprotein A1%2C A2/B1 homolog%2C transcript variant X1
XM_019899321.1	NW_017851651.1	2334.64	-0.588882	0.00520507	uncharacterized LOC109533839
XM_019909576.1	NW_017852166.1	8529.12	-0.589517	4.03e-06	UPF0518 protein GK23746%2C transcript variant X1
XM_019908855.1	NW_017852126.1	3690.22	-0.58981	5.25e-07	CCAAT/enhancer-binding protein gamma
XM_019909165.1	NW_017852139.1	1411.21	-0.589928	0.00701003	diacylglycerol kinase theta%2C transcript variant X1
XM_019910790.1	NW_017852245.1	9024.32	-0.590079	3.25e-05	phosphatidylinositol-binding clathrin assembly protein LAP%2C transcript variant X1
XM_019900306.1	NW_017851751.1	2082.3	-0.590487	4.19e-10	U11/U12 small nuclear ribonucleoprotein 48 kDa protein-like
XM_019903554.1	NW_017852030.1	2672.42	-0.591221	0.000303301	protein unc-45 homolog B
XM_019899446.1	NW_017851659.1	583.124	-0.591554	1.25e-05	ras-related protein Rab-27A
XM_019904604.1	NW_017852049.1	20250.4	-0.592576	0.00746525	alcohol dehydrogenase class-3%2C transcript variant X1
XM_019904524.1	NW_017852043.1	18685.4	-0.593186	1.59e-06	puromycin-sensitive aminopeptidase
XM_019902585.1	NW_017852012.1	5297.59	-0.594031	6.25e-05	atlastin
XM_019903046.1	NW_017852017.1	6163.44	-0.594058	0.00424877	protein yellow-like
XM_019912880.1	NW_017852317.1	1531.28	-0.594763	0.00908423	histone-lysine N-methyltransferase eggless
XM_019913983.1	NW_017852350.1	6333.48	-0.594982	0.00328488	uncharacterized LOC109544010%2C transcript variant X1
XM_019911085.1	NW_017852258.1	10179.6	-0.595044	0.00890117	6-phosphofructo-2-kinase/fructose-2%2C6-bisphosphatase%2C transcript variant X1
XR_002172350.1	NW_017852224.1	99.3698	-0.595774	0.00616182	uncharacterized LOC109541578
XR_002172291.1	NW_017852168.1	1261.4	-0.596485	0.000145399	uncharacterized LOC109541218
XM_019917171.1	NW_017851087.1	4811.7	-0.597756	0.00176891	KAT8 regulatory NSL complex subunit 1
XM_019918051.1	NW_017851187.1	19228.3	-0.597821	1.06e-05	receptor expression-enhancing protein 5-like%2C transcript variant X1
XM_019905629.1	NW_017852068.1	2326.01	-0.598728	4.12e-05	sex determination protein fruitless%2C transcript variant X1
XM_019902923.1	NW_017852017.1	2974.84	-0.598803	9.67e-07	synaptogyrin-1
XM_019908619.1	NW_017852117.1	3110.82	-0.59913	0.00085853	rho-associated protein kinase 1%2C transcript variant X1
XM_019902654.1	NW_017852012.1	1442.02	-0.60031	0.00428171	putative protein TPRXL%2C transcript variant X1
XM_019903555.1	NW_017852030.1	1849.55	-0.60035	0.00677461	uncharacterized LOC109537038
XM_019909851.1	NW_017852166.1	3385.06	-0.601011	6.06e-07	uncharacterized LOC109541114
XM_019906257.1	NW_017852082.1	5633.24	-0.602976	0.00649936	lipopolysaccharide-induced tumor necrosis factor-alpha factor homolog%2C transcript variant X1
XM_019914182.1	NW_017852355.1	3104.08	-0.60313	6.2e-05	regulator of G-protein signaling loco
XM_019906166.1	NW_017852076.1	4106.58	-0.603355	2.12e-07	protein SMG5
XM_019916279.1	NW_017852381.1	1201.35	-0.60409	2.93e-05	lateral signaling target protein 2 homolog
XM_019909505.1	NW_017852166.1	4980.76	-0.604521	0.00028708	plexin A3%2C transcript variant X1
XM_019911897.1	NW_017852299.1	4319.75	-0.605037	0.00138954	fasciculation and elongation protein zeta-2-like
XM_019899394.1	NW_017851651.1	1583.16	-0.605464	0.00627508	uncharacterized LOC109533886
XM_019915752.1	NW_017852378.1	1336.75	-0.605908	1.54e-07	histone deacetylase 11%2C transcript variant X1
XM_019914336.1	NW_017852358.1	4332.09	-0.606269	0.00202363	ceramide synthase 6
XM_019904466.1	NW_017852043.1	4847.61	-0.606388	0.00908819	splicing factor 3B subunit 3
XM_019907458.1	NW_017852103.1	45994	-0.60642	0.00105254	uncharacterized LOC109539606
XM_019899941.1	NW_017851724.1	11039	-0.606583	7.38e-06	rho guanine nucleotide exchange factor 12%2C transcript variant X1
XR_002172161.1	NW_017849039.1	1104.67	-0.608072	8.09e-06	uncharacterized LOC109540124
XM_019911475.1	NW_017852269.1	6059.39	-0.608188	0.00105404	septin-7
XM_019898096.1	NW_017851282.1	475.907	-0.608712	0.00103674	RNA pseudouridylate synthase domain-containing protein 1-like
XM_019916153.1	NW_017852381.1	20938.7	-0.609571	0.000842093	protein transport protein Sec61 subunit alpha
XM_019903523.1	NW_017852030.1	1797.87	-0.609771	8.11e-05	intersectin-1-like%2C transcript variant X1
XM_019897781.1	NW_017851239.1	4161.78	-0.610456	0.00029011	myb-related protein B%2C transcript variant X1
XM_019905217.1	NW_017848565.1	3261.75	-0.611	0.000757334	fasciculation and elongation protein zeta-2-like
XM_019911059.1	NW_017852257.1	388.096	-0.611739	0.00384648	prolow-density lipoprotein receptor-related protein 1-like
XM_019911518.1	NW_017852270.1	1847.88	-0.61175	0.00484063	lysozyme-like%2C transcript variant X1
XM_019916095.1	NW_017852381.1	7031.28	-0.613712	0.00313467	trafficking kinesin-binding protein milt%2C transcript variant X1
XM_019901542.1	NW_017845217.1	1342.9	-0.61424	0.006766	NCK-interacting protein with SH3 domain-like
XM_019901920.1	NW_017851949.1	735.72	-0.615972	0.000638841	uncharacterized LOC109535894%2C transcript variant X1
XM_019916338.1	NW_017852381.1	1525.18	-0.6162	0.00246797	late secretory pathway protein AVL9 homolog
XM_019911325.1	NW_017852267.1	2575.23	-0.61719	0.000549785	serine/arginine repetitive matrix protein 2-like
XR_002171477.1	NW_017846491.1	177.039	-0.617266	0.0031323	uncharacterized LOC109533025%2C transcript variant X1
XM_019907333.1	NW_017848930.1	1521.56	-0.618253	0.00134141	zinc finger protein 143-like
XM_019900523.1	NW_017851775.1	2846.65	-0.618658	0.00152997	hyccin
XM_019909736.1	NW_017852166.1	17333.1	-0.619093	0.00740724	23 kDa integral membrane protein-like
XM_019910807.1	NW_017852245.1	14799.1	-0.621072	4.49e-05	aryl hydrocarbon receptor nuclear translocator-like protein 1
XM_019898415.1	NW_017851411.1	1620.71	-0.622554	0.00530813	SCY1-like protein 2
XM_019913190.1	NW_017852329.1	977.868	-0.622564	0.00187598	ATP-dependent RNA helicase DHX8
XM_019902208.1	NW_017852003.1	5320.54	-0.622917	0.00210892	protein dopey-1 homolog%2C transcript variant X1
XM_019898021.1	NW_017851282.1	4921.24	-0.623195	0.00214753	chromodomain-helicase-DNA-binding protein 1%2C transcript variant X1
XM_019902668.1	NW_017852012.1	1753.53	-0.623893	3.56e-06	RNA polymerase II subunit A C-terminal domain phosphatase
XM_019914164.1	NW_017852353.1	2189.52	-0.624472	1.46e-06	male-specific lethal 1 homolog
XM_019901295.1	NW_017851859.1	3981.7	-0.62458	2.73e-06	protein pangolin%2C isoforms A/H/I/S%2C transcript variant X1
XM_019906753.1	NW_017852087.1	84.7145	-0.624638	0.00418539	fork head domain-containing protein crocodile
XM_019912205.1	NW_017852302.1	6627.79	-0.62555	0.000602581	formin-binding protein 1-like%2C transcript variant X1
XM_019902229.1	NW_017852003.1	3123.93	-0.628651	0.00172546	transcription initiation factor TFIID subunit 1%2C transcript variant X1
XR_002172228.1	NW_017852138.1	529.309	-0.629581	0.000224808	uncharacterized LOC109540686
XM_019897848.1	NW_017851256.1	10612.6	-0.632089	0.00613207	microtubule-associated serine/threonine-protein kinase 3%2C transcript variant X1
XM_019898631.1	NW_017851505.1	6571.54	-0.633717	2.33e-08	serine/threonine-protein kinase 10-like
XM_019915897.1	NW_017852380.1	5236.42	-0.633894	0.000907195	ski oncogene%2C transcript variant X1
XM_019907810.1	NW_017852106.1	827.436	-0.634058	0.00412611	neuromedin-U receptor 2-like%2C transcript variant X1
XM_019916061.1	NW_017852381.1	146.354	-0.635504	0.00794729	uncharacterized LOC109545395
XM_019911047.1	NW_017852257.1	1459.96	-0.635764	0.000885557	prolow-density lipoprotein receptor-related protein 1-like
XM_019903055.1	NW_017852017.1	1999.32	-0.636061	0.00298953	H(+)/Cl(-) exchange transporter 7
XM_019902377.1	NW_017852012.1	4549.73	-0.636948	3.28e-05	paired amphipathic helix protein Sin3b%2C transcript variant X1
XM_019912448.1	NW_017852305.1	4411.28	-0.638992	2.95e-07	integral membrane protein GPR155
XM_019898786.1	NW_017851551.1	372.645	-0.640205	3.26e-05	myotubularin-related protein 13-like
XM_019907522.1	NW_017852103.1	1220.96	-0.64062	0.000309725	zinc finger BED domain-containing protein 1-like%2C transcript variant X1
XM_019905003.1	NW_017852056.1	681.861	-0.64063	1.41e-05	mothers against decapentaplegic homolog 4
XM_019916700.1	NW_017850559.1	536.557	-0.640992	0.00374986	serine/threonine-protein kinase 3-like
XM_019912465.1	NW_017852305.1	5289.77	-0.642134	0.00143991	uncharacterized LOC109542986%2C transcript variant X1
XM_019912490.1	NW_017852305.1	1918.33	-0.643079	0.00188387	chromatin modification-related protein eaf-1-like%2C transcript variant X1
XM_019915911.1	NW_017852380.1	5228.56	-0.644419	8.26e-05	kinesin-like protein unc-104%2C transcript variant X1
XM_019901221.1	NW_017851842.1	1134.02	-0.645909	0.00161021	protein sprouty homolog 2
XM_019911358.1	NW_017852267.1	9071.56	-0.646152	6.26e-05	supervillin-like%2C transcript variant X1
XM_019907237.1	NW_017848929.1	958.921	-0.646374	0.0016565	zinc finger protein 143-like
XM_019908402.1	NW_017852115.1	3136.64	-0.647281	0.000847311	ARF GTPase-activating protein GIT2
XM_019899194.1	NW_017851651.1	14648.2	-0.647826	6.95e-06	plasma membrane calcium-transporting ATPase 1%2C transcript variant X1
XM_019905988.1	NW_017852073.1	1589.76	-0.648125	4.9e-05	putative Polycomb group protein ASXL3%2C transcript variant X1
XM_019901492.1	NW_017851912.1	3723.42	-0.648779	0.00821029	uncharacterized LOC109535575%2C transcript variant X1
XM_019916119.1	NW_017852381.1	1298.47	-0.64905	1.13e-07	ecdysone receptor%2C transcript variant X1
XM_019898536.1	NW_017851453.1	4560.8	-0.650109	0.00057389	cellular tumor antigen p53%2C transcript variant X1
XM_019914861.1	NW_017850125.1	394.354	-0.651044	0.00723186	serine/threonine-protein kinase 3-like
XM_019911037.1	NW_017852257.1	917.873	-0.65121	0.000598948	low-density lipoprotein receptor-related protein 1-like
XM_019913231.1	NW_017852335.1	7547.29	-0.652469	0.00801019	stress-induced-phosphoprotein 1
XM_019915667.1	NW_017852377.1	4958.95	-0.652556	0.00168051	basic salivary proline-rich protein 1-like%2C transcript variant X1
XM_019900418.1	NW_017851768.1	353.876	-0.65403	0.00409604	protein dachsous
XM_019905363.1	NW_017852062.1	159.107	-0.655562	0.00645747	homeobox protein Hox-C4a%2C transcript variant X1
XR_002172564.1	NW_017852362.1	362.045	-0.655811	0.000167022	uncharacterized LOC109544346
XM_019913709.1	NW_017852342.1	1304.79	-0.656399	0.00033349	uncharacterized LOC109543823%2C transcript variant X1
XM_019899169.1	NW_017846795.1	350.882	-0.656713	0.00421389	protein dachsous-like
XM_019906327.1	NW_017852082.1	2669.89	-0.65694	0.0012979	uncharacterized LOC109538897%2C transcript variant X1
XM_019907066.1	NW_017852096.1	1225.46	-0.657413	0.00132044	coiled-coil domain-containing protein 102A%2C transcript variant X1
XM_019908639.1	NW_017852117.1	2712.95	-0.658201	0.00561978	insulin-like growth factor-binding protein complex acid labile subunit%2C transcript variant X1
XM_019914993.1	NW_017852366.1	273.729	-0.658301	9.4e-05	beta-1%2C4-galactosyltransferase galt-1-like%2C transcript variant X1
XM_019906639.1	NW_017852086.1	28125.2	-0.65994	0.00350862	CAP-Gly domain-containing linker protein 2%2C transcript variant X1
XM_019912530.1	NW_017852305.1	2123.68	-0.660944	0.000126815	activating signal cointegrator 1 complex subunit 1-like
XM_019913402.1	NW_017852336.1	2372.75	-0.661123	0.000598948	protein CASC3
XM_019916672.1	NW_017850502.1	3806.11	-0.661992	2.15e-09	serine/threonine-protein kinase 10-like
XM_019915540.1	NW_017852374.1	8046.64	-0.662118	4.34e-11	chromodomain-helicase-DNA-binding protein Mi-2 homolog%2C transcript variant X1
XM_019909329.1	NW_017852162.1	1338.47	-0.66375	8.89e-05	uncharacterized LOC109540838
XM_019899836.1	NW_017851713.1	2461.96	-0.664523	2.95e-05	schwannomin-interacting protein 1 homolog%2C transcript variant X1
XM_019909421.1	NW_017852166.1	971.158	-0.665417	0.00372891	uncharacterized LOC109540896%2C transcript variant X1
XM_019914279.1	NW_017852358.1	1970.12	-0.665462	0.00377344	uncharacterized LOC109544210
XM_019908207.1	NW_017852110.1	9541.11	-0.665602	0.000426101	uncharacterized LOC109540050
XM_019904670.1	NW_017852052.1	1388.19	-0.666277	0.000432299	protein son of sevenless
XM_019916673.1	NW_017850503.1	4816.8	-0.666474	7.46e-10	serine/threonine-protein kinase 10-like
XM_019906037.1	NW_017852073.1	2802.66	-0.666508	6.95e-09	division abnormally delayed protein
XM_019913472.1	NW_017852337.1	5074.64	-0.667329	0.000164581	ATP-binding cassette sub-family B member 7%2C mitochondrial
XM_019901608.1	NW_017851929.1	3884.24	-0.667732	0.00559537	PHD finger protein 14%2C transcript variant X1
XM_019911499.1	NW_017852270.1	862.587	-0.667763	0.000454296	activating signal cointegrator 1
XM_019918196.1	NW_017846291.1	9744.71	-0.667971	0.00203486	baculoviral IAP repeat-containing protein 2-like
XM_019900725.1	NW_017851804.1	518.749	-0.671737	0.00386517	uncharacterized LOC109534928
XM_019909641.1	NW_017852166.1	8789.45	-0.672153	0.00809541	keratin%2C type I cytoskeletal 9-like%2C transcript variant X1
XM_019911090.1	NW_017852258.1	6053.25	-0.672571	3.51e-05	hairy/enhancer-of-split related with YRPW motif protein%2C transcript variant X1
XM_019902282.1	NW_017852003.1	690.767	-0.674027	2.55e-05	zinc finger BED domain-containing protein 1-like%2C transcript variant X1
XM_019911563.1	NW_017852278.1	2641.5	-0.674651	6.66e-05	RNA polymerase II elongation factor Ell
XM_019909555.1	NW_017852166.1	3996.03	-0.674652	7.33e-05	histone-lysine N-methyltransferase%2C H3 lysine-79 specific-like%2C transcript variant X1
XM_019906113.1	NW_017852075.1	387.995	-0.674819	4.29e-05	uncharacterized LOC109538740
XM_019906001.1	NW_017852073.1	2332.25	-0.675339	0.000635314	transforming growth factor-beta-induced protein ig-h3
XM_019901275.1	NW_017851853.1	2539.28	-0.675837	1.03e-05	zinc finger protein 587-like
XM_019898305.1	NW_017851382.1	1428.68	-0.677045	0.000371384	PHD finger protein rhinoceros%2C transcript variant X1
XM_019905910.1	NW_017852073.1	9652.5	-0.677843	1.53e-05	serine/threonine-protein kinase mig-15%2C transcript variant X1
XM_019900610.1	NW_017851783.1	420.812	-0.678732	0.00562947	zinc finger SWIM domain-containing protein 6-like
XM_019907910.1	NW_017852107.1	2641.17	-0.678813	2.36e-05	zinc finger protein OZF-like%2C transcript variant X1
XM_019900326.1	NW_017851754.1	16370.9	-0.679096	0.0012983	baculoviral IAP repeat-containing protein 2-like
XM_019897953.1	NW_017851282.1	8584.43	-0.679622	0.00016741	rho GTPase-activating protein 28-like%2C transcript variant X1
XM_019913514.1	NW_017852339.1	2603.92	-0.682345	2.94e-06	AF4/FMR2 family member 4
XM_019899997.1	NW_017851724.1	3617.68	-0.683154	0.00643242	pyrimidodiazepine synthase-like
XM_019917033.1	NW_017851084.1	1320.34	-0.683937	0.000794445	peripheral plasma membrane protein CASK%2C transcript variant X1
XM_019907992.1	NW_017852108.1	2677.38	-0.684098	0.00113242	peptidoglycan-recognition protein SC2-like%2C transcript variant X1
XM_019898925.1	NW_017851601.1	906.851	-0.68449	0.000543533	DNA-binding protein D-ETS-4%2C transcript variant X1
XM_019902271.1	NW_017852003.1	1246.37	-0.687166	3.08e-05	thyroid hormone receptor-associated protein 3-like
XM_019909350.1	NW_017852166.1	8600.81	-0.688823	0.00035343	kinesin-like protein KIF13A
XM_019904001.1	NW_017852037.1	5330.87	-0.689183	0.000363404	piezo-type mechanosensitive ion channel component
XM_019902444.1	NW_017852012.1	4156.23	-0.690725	7.09e-08	uncharacterized LOC109536289
XM_019909553.1	NW_017852166.1	11256.4	-0.693525	0.000101237	dnaJ protein homolog 1
XM_019899155.1	NW_017851647.1	5088.27	-0.695005	1.57e-05	myosin-VIIa%2C transcript variant X1
XM_019909690.1	NW_017852166.1	2464.03	-0.69531	0.00254741	uncharacterized LOC109541025%2C transcript variant X1
XM_019900595.1	NW_017851776.1	1930.77	-0.69559	0.002701	interferon regulatory factor 2-binding protein 2-B-like
XM_019911633.1	NW_017852279.1	1139.84	-0.695608	0.0025354	MAGUK p55 subfamily member 6%2C transcript variant X1
XM_019903789.1	NW_017848143.1	1195.01	-0.697229	0.00126191	uncharacterized protein DDB_G0283697-like%2C transcript variant X1
XM_019902842.1	NW_017852015.1	4608.52	-0.697436	0.00235234	uncharacterized LOC109536574
XM_019908900.1	NW_017852126.1	6121.71	-0.698089	1.55e-05	DNA-directed RNA polymerase II subunit RPB1
XM_019901696.1	NW_017851937.1	366.096	-0.701662	0.000670351	uncharacterized LOC109535742%2C transcript variant X1
XM_019910115.1	NW_017852173.1	859.956	-0.702236	3.09e-07	transcriptional repressor protein YY1-like%2C transcript variant X1
XM_019902803.1	NW_017852014.1	2615.09	-0.703413	0.00538118	immunoglobulin superfamily DCC subclass member 4-like
XM_019899806.1	NW_017851711.1	329.064	-0.704141	0.0002834	angiotensin-converting enzyme-like
XM_019914674.1	NW_017852366.1	8392.45	-0.706353	0.000900218	protein alan shepard%2C transcript variant X1
XM_019900202.1	NW_017851737.1	1702.02	-0.706411	1.13e-07	NF-X1-type zinc finger protein NFXL1
XM_019912520.1	NW_017852305.1	95.0846	-0.708498	0.00112022	T-box transcription factor TBX10
XM_019910353.1	NW_017852201.1	2378.02	-0.708876	0.00606502	proto-oncogene tyrosine-protein kinase ROS
XM_019903191.1	NW_017852021.1	13751.6	-0.709089	0.00773781	protein phosphatase PTC7 homolog
XM_019912018.1	NW_017852300.1	2032.9	-0.70916	0.00402584	riboflavin kinase%2C transcript variant X1
XM_019917705.1	NW_017851173.1	2225.68	-0.711555	0.00139585	actin cytoskeleton-regulatory complex protein PAN1-like%2C transcript variant X1
XM_019900262.1	NW_017847028.1	541.679	-0.712425	5.65e-05	cyclic AMP response element-binding protein A-like%2C transcript variant X1
XM_019914185.1	NW_017852355.1	3542.7	-0.713894	0.000534465	transmembrane protein 245%2C transcript variant X1
[truncated: 698 more rows]
