# Supplementary material for: Identification of genes and gene expression associated with dispersal capacity in the mountain pine beetle, Dendroctonus ponderosae Hopkins (Coleoptera: Curculionidae)
Source: PeerJ. 2021 Oct 26;9:e12382. doi: 10.7717/peerj.12382 (PMC8555496; doi:10.7717/peerj.12382)
Supplement: Supplemental Information 2 — This table includes the Genbank accession number, annotation based on the male mountain pine beetle draft genome (Keeling et al., 2013), Log2 fold change (positive values are upregulated with flight and negative values are downregulated with flight in strong fliers), and the adjusted p-value based on a Benjamini–Hochberg correction for false discovery rate. [file peerj-09-12382-s002.xlsx]

## Sheet: Sheet1
Accession	Annotation	log2 Fold Change	padj	Role
XM_019899335.1	nocturnin isoform X1	-1.43	8.8e-10	Behavior
XM_019907230.1	nocturnin isoform X2	-1.2	2.7e-06	Behavior
XM_019914674.1	protein alan shepard isoform X8	-0.72	6.5e-05	Behavior
XM_019911839.1	circadian clock-controlled protein-like	1.99	1e-05	Behavior
XM_019917055.1	probable cytochrome P450 9f2	-1.57	0.00042	Detoxification
XM_019909987.1	cytochrome P450 9e2-like	-1.55	0.00031	Detoxification
XM_019909983.1	cytochrome P450 9e2-like	-1.39	0.00054	Detoxification
XM_019906180.1	cytochrome P450 9e2-like	-1.26	0.0021	Detoxification
XM_019915611.1	probable cytochrome P450 28d1	-0.87	0.0066	Detoxification
XM_019904514.1	cytochrome P450 307a1-like	-0.84	0.0076	Detoxification
XM_019904602.1	cytochrome P450 307a1-like	-0.83	0.0085	Detoxification
XM_019916691.1	cytochrome P450 4d2-like isoform X1	-0.78	0.003	Detoxification
XM_019916694.1	cytochrome P450 4d2-like	-0.78	0.005	Detoxification
XM_019913251.1	cytochrome P450 6B1-like	0.37	0.0055	Detoxification
XM_019917741.1	cytochrome P450 302a1, mitochondrial-like	0.53	6.4e-05	Detoxification
XM_019917605.1	multidrug resistance-associated protein 4-like	0.73	0.00013	Detoxification
XM_019917607.1	multidrug resistance-associated protein 4-like	0.74	0.0065	Detoxification
XM_019898552.1	cytochrome P450 4g15-like	0.79	0.0041	Detoxification
XM_019917604.1	multidrug resistance-associated protein 4-like	0.85	8.6e-06	Detoxification
XM_019901159.1	probable cytochrome P450 4aa1	0.87	3.7e-05	Detoxification
XM_019898650.1	cytochrome P450 CYP6BW1	0.89	0.0014	Detoxification
XM_019913238.1	cytochrome P450 6B1-like	1	0.0012	Detoxification
XM_019918001.1	cytochrome P450 4C1-like	1.23	0.0019	Detoxification
XM_019915536.1	cytochrome P450 6k1-like	1.31	0.002	Detoxification
XM_019901126.1	cytochrome P450 4g1-like	1.32	0.00013	Detoxification
XM_019908046.1	multidrug resistance-associated protein 4-like	1.32	2.1e-06	Detoxification
XM_019914207.1	probable cytochrome P450 6a13	1.36	0.00014	Detoxification
XR_002171627.1	cytochrome P450 6a2-like	1.46	0.00068	Detoxification
XM_019910044.1	cytochrome P450 6k1-like	1.53	0.00021	Detoxification
XM_019898560.1	cytochrome P450 6a2-like	1.71	3.6e-07	Detoxification
XM_019898558.1	cytochrome P450 6A1-like	1.89	4.1e-12	Detoxification
XM_019917057.1	cytochrome P450 4c3-like isoform X1	2.01	1e-06	Detoxification
XM_019902592.1	glutathione S-transferase theta-1-like isoform X1	-0.79	4.9e-06	Detoxification - antioxidant
XM_019915413.1	microsomal glutathione S-transferase 1-like	-0.52	0.0012	Detoxification - antioxidant
XM_019905169.1	glutathione S-transferase-like	-0.29	0.0085	Detoxification - antioxidant
XM_019899571.1	glutathione S-transferase 1-like	0.53	0.00038	Detoxification - antioxidant
XM_019916272.1	PREDICTED: peroxiredoxin-2-like	0.65	4.7e-05	Detoxification - antioxidant
XM_019905168.1	glutathione S-transferase-like	0.89	3.6e-05	Detoxification - antioxidant
XM_019909039.1	PREDICTED: peroxiredoxin-6	0.89	4.7e-07	Detoxification - antioxidant
XM_019915687.1	probable phospholipid hydroperoxide glutathione peroxidase%2C transcript variant X1	0.94	0.00031	Detoxification - antioxidant
XM_019906204.1	probable phospholipid hydroperoxide glutathione peroxidase%2C transcript variant X1	0.94	0.00031	Detoxification - antioxidant
XM_019899020.1	glutathione S-transferase-like	0.99	0.0032	Detoxification - antioxidant
XM_019907423.1	ecdysone-inducible protein E75 isoform X1	-0.8	2.7e-11	Endocrine
XM_019898632.1	ecdysone 20-monooxygenase isoform X1	0.57	6.5e-05	Endocrine
XM_019911438.1	juvenile hormone epoxide hydrolase 1-like	0.85	0.0017	Endocrine
XM_019906207.1	juvenile hormone epoxide hydrolase 1-like	0.99	5.8e-05	Endocrine
XM_019900280.1	putative molluscan insulin-related peptide(s) receptor	1.04	3.2e-06	Endocrine
XM_019900281.1	insulin receptor-like	1.02	4.3e-06	Endocrine
XM_019898016.1	insulin receptor-like	0.99	4.7e-05	Endocrine
XM_019913890.1	insulin-degrading enzyme	-0.33	0.00013	Endocrine
XM_019912320.1	insulin-like growth factor 1 receptor	0.96	1.4e-05	Endocrine
XM_019913102.1	insulin-like growth factor-binding protein complex acid labile subunit transcript variant X1	-1.11	1.1e-05	Endocrine
XM_019905105.1	heat shock protein 70 A1-like isoform X1	-1.39	0.00032	Heat Shock Proteins
XM_019905101.1	heat shock protein 68-like	-1.02	0.0041	Heat Shock Proteins
XM_019899536.1	heat shock 70 kDa protein II-like isoform X2	-0.68	0.0021	Heat Shock Proteins
XM_019904181.1	heat shock protein 83	-0.51	0.0012	Heat Shock Proteins
XM_019901242.1	heat shock 70 kDa protein 4 isoform X1	-0.49	0.0013	Heat Shock Proteins
XM_019905254.1	heat shock protein 75 kDa, mitochondrial	-0.45	5.5e-05	Heat Shock Proteins
XM_019899225.1	heat shock 70 kDa protein-like isoform X2	0.8	0.00011	Heat Shock Proteins
XM_019914951.1	pancreatic triacylglycerol lipase	-1.29	0.0076	Metabolism - Lipid
XM_019901458.1	putative fatty acyl-CoA reductase CG5065	-0.75	0.0067	Metabolism - Lipid
XM_019908951.1	abhydrolase domain-containing protein 2	-0.28	0.0015	Metabolism - Lipid
XM_019900381.1	acyl-CoA dehydrogenase family member 9, mitochondrial	0.47	0.0019	Metabolism - Lipid
XM_019915250.1	monoacylglycerol lipase ABHD12-like isoform X1	0.59	0.00022	Metabolism - Lipid
XM_019916253.1	pancreatic triacylglycerol lipase-like isoform X1	0.66	0.0027	Metabolism - Lipid
XM_019911517.1	lipase member H-A-like	0.67	0.0028	Metabolism - Lipid
XM_019903342.1	2-hydroxyacyl-CoA lyase 1	0.74	0.0037	Metabolism - Lipid
XM_019905050.1	very-long-chain 3-oxoacyl-CoA reductase	0.84	0.0025	Metabolism - Lipid
XM_019908494.1	short/branched chain specific acyl-CoA dehydrogenase, mitochondrial	0.87	5.1e-05	Metabolism - Lipid
XM_019908288.1	phospholipase B1, membrane-associated-like	0.96	5e-05	Metabolism - Lipid
XM_019899282.1	phospholipase DDHD2 isoform X1	1.03	0.00024	Metabolism - Lipid
XM_019906151.1	lipase 3-like	1.03	0.00022	Metabolism - Lipid
XM_019908331.1	fatty acyl-CoA reductase wat-like	1.08	0.0014	Metabolism - Lipid
XM_019899377.1	lipoprotein lipase-like	1.18	0.002	Metabolism - Lipid
XM_019901196.1	lipase 3-like	1.37	3.6e-05	Metabolism - Lipid
XM_019917332.1	pancreatic lipase-related protein 3-like	1.49	0.0011	Metabolism - Lipid
XM_019899299.1	pancreatic triacylglycerol lipase-like	1.82	2.8e-05	Metabolism - Lipid
XM_019918004.1	putative fatty acyl-CoA reductase CG5065 isoform X1	1.99	1.8e-05	Metabolism - Lipid
XM_019915053.1	group XV phospholipase A2-like	2.28	3.9e-11	Metabolism - Lipid
XM_019906965.1	collagen alpha chain CG42342-like transcript variant X1	0.62	0.00025	Muscle form and function
XM_019912643.1	collagen alpha-1(XI) chain-like	0.71	0.0014	Muscle form and function
XM_019916633.1	collagen alpha-2(XI) chain-like	0.83	0.0017	Muscle form and function
XM_019905926.1	collagen alpha-5(IV) chain	0.8	0.0013	Muscle form and function
XM_019906403.1	myosin heavy chain non-muscle transcript variant X1	-0.49	0.0021	Muscle form and function
XM_019907520.1	paramyosin-like	0.83	0.00049	Muscle form and function
XM_019916148.1	myosin-10-like	1	5.8e-06	Muscle form and function
XM_019915840.1	myosin-IA transcript variant X1	-1.03	1.7e-05	Muscle form and function
XM_019899155.1	myosin-VIIa transcript variant X1	-0.47	0.00073	Muscle form and function
XM_019908500.1	myotubularin-related protein 10-A	0.4	9.3e-09	Muscle form and function
XM_019898786.1	myotubularin-related protein 13-like	-0.53	5.9e-05	Muscle form and function
XM_019898787.1	myotubularin-related protein 13-like	-0.49	0.0075	Muscle form and function
XM_019910219.1	myotubularin-related protein 13-like	-0.46	0.002	Muscle form and function
XM_019903766.1	myotubularin-related protein 14%2C transcript variant X1	1.17	2e-07	Muscle form and function
XM_019908753.1	myotubularin-related protein 8	-0.4	0.0069	Muscle form and function
XM_019910296.1	odorant receptor 49b	-1.45	0.0019	Olfaction
XM_019902425.1	chemosensory protein 2	-1.17	2.7e-06	Olfaction
XM_019902670.1	chemosensory protein 4	-1.04	0.0017	Olfaction
XM_019902486.1	odorant-binding protein 4	-1	0.0063	Olfaction
XM_019915903.1	odorant receptor 63a-like isoform X1	-0.96	0.0017	Olfaction
XM_019902493.1	odorant-binding protein 28	-0.88	0.0076	Olfaction
XM_019901389.1	odorant receptor 67c-like isoform X2	-0.77	0.00011	Olfaction
XM_019913381.1	odorant-binding protein 26	0.8	0.005	Olfaction
XM_019911214.1	odorant-binding protein 27	1.3	0.0017	Olfaction
