# Supplementary material for: Identification of genes and gene expression associated with dispersal capacity in the mountain pine beetle, Dendroctonus ponderosae Hopkins (Coleoptera: Curculionidae)
Source: PeerJ. 2021 Oct 26;9:e12382. doi: 10.7717/peerj.12382 (PMC8555496; doi:10.7717/peerj.12382)
Supplement: Supplemental Information 4 — Each sheet contains an individual’s flight information, including the precise start and stop time for each flight, as well as the flight mill #, sample ID, and duration of each flight, and the number of rotations of the flight mill in each bout of flight. Note that flight duration is measured as “0” unless >1 rotations are made; duration of flight cannot be measured with only a single data point. [file peerj-09-12382-s004.xlsx]

## Sheet: W289
Start Time	Stop Time	Flight Mill #	Sample ID	Duration (sec)	Count (rotations on flight mill)
6/16/2016 1:10:48 PM	6/16/2016 1:12:48 PM	12	W289	119.5	68
6/16/2016 1:15:17 PM	6/16/2016 1:15:17 PM	12	W289	0	1
6/16/2016 1:19:12 PM	6/16/2016 1:19:20 PM	12	W289	7.71875	4
6/16/2016 1:28:12 PM	6/16/2016 1:28:12 PM	12	W289	0	1
6/16/2016 1:39:25 PM	6/16/2016 1:39:32 PM	12	W289	7.48438	4
6/16/2016 1:44:42 PM	6/16/2016 1:44:52 PM	12	W289	10.5312	6
6/16/2016 1:50:05 PM	6/16/2016 1:50:16 PM	12	W289	11.5781	7
6/16/2016 1:50:23 PM	6/16/2016 1:50:23 PM	12	W289	0	1
6/16/2016 2:03:12 PM	6/16/2016 2:03:28 PM	12	W289	15.4844	9
6/16/2016 2:12:49 PM	6/16/2016 2:13:01 PM	12	W289	11.6406	7
6/16/2016 2:20:40 PM	6/16/2016 2:20:40 PM	12	W289	0	1
6/16/2016 2:21:39 PM	6/16/2016 2:21:49 PM	12	W289	10.0781	4
6/16/2016 2:25:07 PM	6/16/2016 2:25:14 PM	12	W289	7.04688	3
6/16/2016 2:25:21 PM	6/16/2016 2:25:21 PM	12	W289	0	1
6/16/2016 2:28:01 PM	6/16/2016 2:28:09 PM	12	W289	8.89062	4
6/16/2016 2:29:53 PM	6/16/2016 2:29:56 PM	12	W289	2.71875	3
6/16/2016 2:31:41 PM	6/16/2016 2:31:41 PM	12	W289	0	1
6/16/2016 2:32:36 PM	6/16/2016 2:32:36 PM	12	W289	0	1
6/16/2016 2:33:41 PM	6/16/2016 2:33:41 PM	12	W289	0	1
6/16/2016 2:35:40 PM	6/16/2016 2:35:40 PM	12	W289	0	1
6/16/2016 2:35:49 PM	6/16/2016 2:35:49 PM	12	W289	0	1
6/16/2016 2:37:19 PM	6/16/2016 2:37:24 PM	12	W289	5.04688	3
6/16/2016 2:38:36 PM	6/16/2016 2:38:36 PM	12	W289	0	1
6/16/2016 2:41:38 PM	6/16/2016 2:41:47 PM	12	W289	8.875	4
6/16/2016 2:41:53 PM	6/16/2016 2:41:53 PM	12	W289	0	1
6/16/2016 2:49:21 PM	6/16/2016 2:49:24 PM	12	W289	3.71875	2
6/16/2016 2:50:53 PM	6/16/2016 2:50:53 PM	12	W289	0	1
6/16/2016 2:51:00 PM	6/16/2016 2:51:00 PM	12	W289	0	1
6/16/2016 2:54:21 PM	6/16/2016 2:54:30 PM	12	W289	9.125	4
6/16/2016 2:54:36 PM	6/16/2016 2:54:36 PM	12	W289	0	1
6/16/2016 2:58:50 PM	6/16/2016 2:58:59 PM	12	W289	9.04688	3
6/16/2016 3:01:39 PM	6/16/2016 3:01:42 PM	12	W289	3.51562	2
6/16/2016 3:05:39 PM	6/16/2016 3:05:52 PM	12	W289	12.9062	5
6/16/2016 3:09:24 PM	6/16/2016 3:09:33 PM	12	W289	8.35938	4
6/16/2016 3:09:39 PM	6/16/2016 3:09:39 PM	12	W289	0	1
6/16/2016 3:12:08 PM	6/16/2016 3:12:15 PM	12	W289	7.57812	3
6/16/2016 3:14:06 PM	6/16/2016 3:14:20 PM	12	W289	13.4062	5
6/16/2016 3:16:10 PM	6/16/2016 3:16:23 PM	12	W289	13	5
6/16/2016 3:18:25 PM	6/16/2016 3:18:31 PM	12	W289	6.59375	3
6/16/2016 3:20:32 PM	6/16/2016 3:20:45 PM	12	W289	12.5781	5
6/16/2016 3:20:52 PM	6/16/2016 3:20:56 PM	12	W289	3.76562	3
6/16/2016 3:23:17 PM	6/16/2016 3:23:22 PM	12	W289	4.21875	3
6/16/2016 3:25:20 PM	6/16/2016 3:25:24 PM	12	W289	4.0625	2
6/16/2016 3:27:42 PM	6/16/2016 3:27:47 PM	12	W289	4.78125	2
6/16/2016 3:31:21 PM	6/16/2016 3:31:27 PM	12	W289	6.25	3
6/16/2016 3:31:33 PM	6/16/2016 3:31:33 PM	12	W289	0	1
6/16/2016 3:33:47 PM	6/16/2016 3:33:47 PM	12	W289	0	1
6/16/2016 3:37:20 PM	6/16/2016 3:37:33 PM	12	W289	13.1406	5
6/16/2016 3:45:37 PM	6/16/2016 3:45:46 PM	12	W289	9.03125	4
6/16/2016 3:45:51 PM	6/16/2016 3:45:51 PM	12	W289	0	1
6/16/2016 3:49:36 PM	6/16/2016 3:49:48 PM	12	W289	11.6562	4
6/16/2016 3:51:13 PM	6/16/2016 3:51:17 PM	12	W289	3.54688	2
6/16/2016 3:51:23 PM	6/16/2016 3:51:23 PM	12	W289	0	1
6/16/2016 3:53:08 PM	6/16/2016 3:53:22 PM	12	W289	14.0781	5
6/16/2016 3:54:47 PM	6/16/2016 3:54:58 PM	12	W289	11.2969	5
6/16/2016 3:56:11 PM	6/16/2016 3:56:22 PM	12	W289	11.4375	5
6/16/2016 3:56:29 PM	6/16/2016 3:56:29 PM	12	W289	0	1
6/16/2016 3:58:03 PM	6/16/2016 3:58:08 PM	12	W289	4.75	2
6/16/2016 4:03:10 PM	6/16/2016 4:03:25 PM	12	W289	15.0312	5
6/16/2016 4:05:58 PM	6/16/2016 4:05:58 PM	12	W289	0	1
6/16/2016 4:10:27 PM	6/16/2016 4:10:39 PM	12	W289	11.5469	4
6/16/2016 4:14:33 PM	6/16/2016 4:14:42 PM	12	W289	9.17188	3
6/16/2016 4:16:01 PM	6/16/2016 4:16:01 PM	12	W289	0	1
6/16/2016 4:16:08 PM	6/16/2016 4:16:11 PM	12	W289	3.54688	3
6/16/2016 4:18:46 PM	6/16/2016 4:18:47 PM	12	W289	1.75	2
6/16/2016 4:20:38 PM	6/16/2016 4:20:40 PM	12	W289	2.09375	2
6/16/2016 4:22:02 PM	6/16/2016 4:22:04 PM	12	W289	2.32812	1
6/16/2016 4:22:10 PM	6/16/2016 4:22:13 PM	12	W289	3.59375	2
6/16/2016 4:24:25 PM	6/16/2016 4:24:56 PM	12	W289	30.7812	10
6/16/2016 4:27:22 PM	6/16/2016 4:27:27 PM	12	W289	4.84375	2
6/16/2016 4:29:35 PM	6/16/2016 4:29:41 PM	12	W289	6.20312	3
6/16/2016 4:29:47 PM	6/16/2016 4:29:47 PM	12	W289	0	1
6/16/2016 4:31:40 PM	6/16/2016 4:31:40 PM	12	W289	0	1
6/16/2016 4:31:45 PM	6/16/2016 4:31:45 PM	12	W289	0	1
6/16/2016 4:33:23 PM	6/16/2016 4:33:49 PM	12	W289	26.25	8
6/16/2016 4:34:58 PM	6/16/2016 4:35:02 PM	12	W289	4.21875	2
6/16/2016 4:35:08 PM	6/16/2016 4:35:08 PM	12	W289	0	1
6/16/2016 4:36:46 PM	6/16/2016 4:36:50 PM	12	W289	3.70312	2
6/16/2016 4:36:56 PM	6/16/2016 4:36:56 PM	12	W289	0	1
6/16/2016 4:43:34 PM	6/16/2016 4:43:43 PM	12	W289	8.70312	3

## Sheet: W293
Start Time	Stop Time	Flight Mill #	Sample ID	Duration (sec)	Count (rotations on flight mill)
6/16/2016 1:06:30 PM	6/16/2016 1:06:30 PM	8	W293	0	1
6/16/2016 1:07:21 PM	6/16/2016 1:07:21 PM	8	W293	0	1
6/16/2016 1:08:30 PM	6/16/2016 1:08:34 PM	8	W293	3.98438	1
6/16/2016 1:09:00 PM	6/16/2016 1:09:03 PM	8	W293	3.64062	2
6/16/2016 1:10:29 PM	6/16/2016 1:10:29 PM	8	W293	0	1
6/16/2016 1:10:58 PM	6/16/2016 1:10:58 PM	8	W293	0	1
6/16/2016 1:11:28 PM	6/16/2016 1:11:28 PM	8	W293	0	1
6/16/2016 1:11:52 PM	6/16/2016 1:12:09 PM	8	W293	17.5938	8
6/16/2016 1:12:58 PM	6/16/2016 1:12:58 PM	8	W293	0	1
6/16/2016 1:13:26 PM	6/16/2016 1:13:26 PM	8	W293	0	1
6/16/2016 1:13:54 PM	6/16/2016 1:13:54 PM	8	W293	0	1
6/16/2016 1:18:24 PM	6/16/2016 1:18:24 PM	8	W293	0	1
6/16/2016 1:19:25 PM	6/16/2016 1:19:25 PM	8	W293	0	1
6/16/2016 1:19:37 PM	6/16/2016 1:19:37 PM	8	W293	0	1
6/16/2016 1:19:46 PM	6/16/2016 1:19:46 PM	8	W293	0	1
6/16/2016 1:19:55 PM	6/16/2016 1:19:55 PM	8	W293	0	1
6/16/2016 1:20:12 PM	6/16/2016 1:20:12 PM	8	W293	0	1
6/16/2016 1:20:21 PM	6/16/2016 1:20:21 PM	8	W293	0	1
6/16/2016 1:20:29 PM	6/16/2016 1:20:30 PM	8	W293	1.125	2
6/16/2016 1:21:03 PM	6/16/2016 1:21:03 PM	8	W293	0	1
6/16/2016 1:21:44 PM	6/16/2016 1:21:44 PM	8	W293	0	1
6/16/2016 1:23:49 PM	6/16/2016 1:23:51 PM	8	W293	1.17188	2
6/16/2016 1:24:24 PM	6/16/2016 1:24:24 PM	8	W293	0	1
6/16/2016 1:26:37 PM	6/16/2016 1:26:37 PM	8	W293	0	1
6/16/2016 1:26:52 PM	6/16/2016 1:26:52 PM	8	W293	0	1
6/16/2016 1:27:01 PM	6/16/2016 1:27:05 PM	8	W293	3.85938	2
6/16/2016 1:27:18 PM	6/16/2016 1:27:22 PM	8	W293	4.07812	2
6/16/2016 1:27:34 PM	6/16/2016 1:27:52 PM	8	W293	17.7344	13
6/16/2016 1:30:16 PM	6/16/2016 1:30:29 PM	8	W293	12.8125	8
6/16/2016 1:32:47 PM	6/16/2016 1:32:53 PM	8	W293	6.28125	2
6/16/2016 1:34:07 PM	6/16/2016 1:34:07 PM	8	W293	0	1
6/16/2016 1:36:16 PM	6/16/2016 1:36:16 PM	8	W293	0	1
6/16/2016 1:37:00 PM	6/16/2016 1:37:00 PM	8	W293	0	1
6/16/2016 1:37:48 PM	6/16/2016 1:37:59 PM	8	W293	10.875	7
6/16/2016 1:39:01 PM	6/16/2016 1:39:01 PM	8	W293	0	1
6/16/2016 1:39:18 PM	6/16/2016 1:39:18 PM	8	W293	0	1
6/16/2016 1:40:01 PM	6/16/2016 1:40:01 PM	8	W293	0	1
6/16/2016 1:40:48 PM	6/16/2016 1:40:48 PM	8	W293	0	1
6/16/2016 1:41:30 PM	6/16/2016 1:41:30 PM	8	W293	0	1
6/16/2016 1:42:14 PM	6/16/2016 1:42:14 PM	8	W293	0	1
6/16/2016 1:43:17 PM	6/16/2016 1:43:17 PM	8	W293	0	1
6/16/2016 1:45:09 PM	6/16/2016 1:45:09 PM	8	W293	0	1
6/16/2016 1:46:27 PM	6/16/2016 1:46:27 PM	8	W293	0	1
6/16/2016 1:47:19 PM	6/16/2016 1:47:28 PM	8	W293	8.40625	5
6/16/2016 1:51:34 PM	6/16/2016 1:51:34 PM	8	W293	0	1
6/16/2016 1:53:02 PM	6/16/2016 1:53:02 PM	8	W293	0	1
6/16/2016 1:54:37 PM	6/16/2016 1:54:37 PM	8	W293	0	1
6/16/2016 1:55:31 PM	6/16/2016 1:55:31 PM	8	W293	0	1
6/16/2016 1:56:05 PM	6/16/2016 1:56:05 PM	8	W293	0	1
6/16/2016 1:57:37 PM	6/16/2016 1:57:43 PM	8	W293	6.26562	2
6/16/2016 1:59:39 PM	6/16/2016 1:59:39 PM	8	W293	0	1
6/16/2016 2:00:43 PM	6/16/2016 2:00:43 PM	8	W293	0	1
6/16/2016 2:00:51 PM	6/16/2016 2:00:51 PM	8	W293	0	1
6/16/2016 2:02:19 PM	6/16/2016 2:02:19 PM	8	W293	0	1

## Sheet: W306
Start Time	Stop Time	Flight Mill #	Sample ID	Duration (sec)	Count (rotations on flight mill)
6/19/2016 4:33:35 PM	6/19/2016 4:33:35 PM	17	W306	0	1
6/19/2016 4:39:12 PM	6/19/2016 4:39:12 PM	17	W306	0	1
6/19/2016 4:45:08 PM	6/19/2016 4:45:08 PM	17	W306	0	1
6/19/2016 5:31:31 PM	6/19/2016 5:31:35 PM	17	W306	4.42188	2
6/19/2016 6:18:45 PM	6/19/2016 6:18:45 PM	17	W306	0	1
6/19/2016 6:19:26 PM	6/19/2016 6:19:26 PM	17	W306	0	1
6/19/2016 6:19:35 PM	6/19/2016 6:19:35 PM	17	W306	0	1
6/19/2016 6:20:01 PM	6/19/2016 6:20:01 PM	17	W306	0	1
6/19/2016 6:20:47 PM	6/19/2016 6:20:48 PM	17	W306	1.78125	2
6/19/2016 6:30:25 PM	6/19/2016 6:30:25 PM	17	W306	0	1
6/19/2016 6:30:39 PM	6/19/2016 6:30:39 PM	17	W306	0	1
6/19/2016 6:31:48 PM	6/19/2016 6:31:48 PM	17	W306	0	1
6/19/2016 6:32:11 PM	6/19/2016 6:32:11 PM	17	W306	0	1
6/19/2016 6:37:56 PM	6/19/2016 6:37:56 PM	17	W306	0	1
6/19/2016 6:38:19 PM	6/19/2016 6:38:19 PM	17	W306	0	1
6/19/2016 6:38:27 PM	6/19/2016 6:38:27 PM	17	W306	0	1
6/19/2016 6:48:24 PM	6/19/2016 6:48:24 PM	17	W306	0	1
6/19/2016 6:49:18 PM	6/19/2016 6:49:18 PM	17	W306	0	1
6/19/2016 6:49:39 PM	6/19/2016 6:49:39 PM	17	W306	0	1
6/19/2016 6:51:49 PM	6/19/2016 6:51:49 PM	17	W306	0	1
6/19/2016 6:52:07 PM	6/19/2016 6:52:07 PM	17	W306	0	1
6/19/2016 6:52:44 PM	6/19/2016 6:52:44 PM	17	W306	0	1
6/19/2016 6:52:53 PM	6/19/2016 6:52:53 PM	17	W306	0	1
6/19/2016 6:53:54 PM	6/19/2016 6:53:54 PM	17	W306	0	1
6/19/2016 7:31:04 PM	6/19/2016 7:31:14 PM	17	W306	9.59375	3
6/19/2016 7:34:16 PM	6/19/2016 7:34:16 PM	17	W306	0	1
6/19/2016 7:58:47 PM	6/19/2016 7:58:47 PM	17	W306	0	2
6/19/2016 7:59:04 PM	6/19/2016 7:59:04 PM	17	W306	0	1
6/19/2016 8:00:16 PM	6/19/2016 8:00:16 PM	17	W306	0	1
6/19/2016 8:00:26 PM	6/19/2016 8:00:26 PM	17	W306	0	1
6/19/2016 8:00:37 PM	6/19/2016 8:00:37 PM	17	W306	0	1
6/19/2016 9:49:45 PM	6/19/2016 9:49:49 PM	17	W306	3.14062	2
6/19/2016 9:49:57 PM	6/19/2016 9:49:57 PM	17	W306	0	1
6/19/2016 9:50:09 PM	6/19/2016 9:50:09 PM	17	W306	0	1
6/20/2016 6:06:47 AM	6/20/2016 6:06:50 AM	17	W306	3.29688	2
6/20/2016 9:06:55 AM	6/20/2016 9:06:55 AM	17	W306	0	1

## Sheet: S311
Start Time	Stop Time	Flight Mill #	Sample ID	Duration (sec)	Count (rotations on flight mill)
6/19/2016 2:30:31 PM	6/19/2016 3:23:15 PM	4	S311	3164.34	3207
6/19/2016 3:23:20 PM	6/19/2016 3:23:20 PM	4	S311	0	1
6/19/2016 3:23:47 PM	6/19/2016 3:59:38 PM	4	S311	2151.22	2115
6/19/2016 4:00:11 PM	6/19/2016 8:54:43 PM	4	S311	17672.7	15362
6/19/2016 8:57:06 PM	6/19/2016 9:31:39 PM	4	S311	2072.91	1175
6/19/2016 9:33:39 PM	6/19/2016 9:45:40 PM	4	S311	720.484	369
6/19/2016 9:45:46 PM	6/19/2016 9:45:46 PM	4	S311	0	1
6/19/2016 9:48:01 PM	6/19/2016 10:03:40 PM	4	S311	938.656	483
6/19/2016 10:03:48 PM	6/19/2016 10:03:48 PM	4	S311	0	1
6/19/2016 10:07:20 PM	6/19/2016 10:09:40 PM	4	S311	140.047	98
6/19/2016 10:09:46 PM	6/19/2016 10:09:46 PM	4	S311	0	1
6/19/2016 10:10:25 PM	6/19/2016 10:11:41 PM	4	S311	75.6406	52
6/19/2016 10:11:46 PM	6/19/2016 10:11:46 PM	4	S311	0	1
6/19/2016 10:13:25 PM	6/19/2016 10:14:04 PM	4	S311	38.7812	26
6/19/2016 10:14:11 PM	6/19/2016 10:14:11 PM	4	S311	0	1
6/19/2016 10:14:44 PM	6/19/2016 10:15:14 PM	4	S311	29.875	20
6/19/2016 10:16:35 PM	6/19/2016 10:17:32 PM	4	S311	56.8438	38
6/19/2016 10:17:40 PM	6/19/2016 10:17:40 PM	4	S311	0	1
6/19/2016 10:18:03 PM	6/19/2016 10:18:46 PM	4	S311	42.7969	30
6/19/2016 10:18:55 PM	6/19/2016 10:18:55 PM	4	S311	0	1
6/19/2016 10:19:12 PM	6/19/2016 10:19:47 PM	4	S311	35.5156	22
6/19/2016 10:20:04 PM	6/19/2016 10:20:56 PM	4	S311	52.1562	34
6/19/2016 10:21:22 PM	6/19/2016 10:21:57 PM	4	S311	34.4844	23
6/19/2016 10:22:07 PM	6/19/2016 10:23:34 PM	4	S311	87.6094	58
6/19/2016 10:23:46 PM	6/19/2016 10:23:48 PM	4	S311	2.35938	1
6/19/2016 10:23:56 PM	6/19/2016 10:24:57 PM	4	S311	60.75	41
6/19/2016 10:25:06 PM	6/19/2016 10:25:06 PM	4	S311	0	1
6/19/2016 10:25:18 PM	6/19/2016 10:25:42 PM	4	S311	24.6406	17
6/19/2016 10:26:03 PM	6/19/2016 10:26:47 PM	4	S311	43.2969	30
6/19/2016 10:26:53 PM	6/19/2016 10:26:53 PM	4	S311	0	1
6/19/2016 10:27:05 PM	6/19/2016 10:28:03 PM	4	S311	58.3281	41
6/19/2016 10:28:09 PM	6/19/2016 10:28:09 PM	4	S311	0	1
6/19/2016 10:28:22 PM	6/19/2016 10:29:00 PM	4	S311	38.1406	26
6/19/2016 10:29:09 PM	6/19/2016 10:29:12 PM	4	S311	2.48438	1
6/19/2016 10:29:23 PM	6/19/2016 10:30:13 PM	4	S311	49.9375	36
6/19/2016 10:30:19 PM	6/19/2016 10:30:19 PM	4	S311	0	1
6/19/2016 10:30:35 PM	6/19/2016 10:31:15 PM	4	S311	40.0469	26
6/19/2016 10:36:46 PM	6/19/2016 10:37:05 PM	4	S311	19.2812	13
6/19/2016 10:37:11 PM	6/19/2016 10:37:11 PM	4	S311	0	1
6/19/2016 11:21:47 PM	6/19/2016 11:23:16 PM	4	S311	89	60
6/19/2016 11:25:02 PM	6/19/2016 11:25:53 PM	4	S311	50.8125	37
6/19/2016 11:26:02 PM	6/19/2016 11:26:02 PM	4	S311	0	1
6/19/2016 11:27:57 PM	6/19/2016 11:28:16 PM	4	S311	18.8438	11
6/19/2016 11:28:28 PM	6/19/2016 11:28:30 PM	4	S311	1.35938	1
6/19/2016 11:29:08 PM	6/19/2016 11:30:42 PM	4	S311	94.0469	73
6/19/2016 11:30:52 PM	6/19/2016 11:30:52 PM	4	S311	0	1
6/20/2016 5:56:40 AM	6/20/2016 5:58:42 AM	4	S311	122.422	74
6/20/2016 5:59:26 AM	6/20/2016 6:00:53 AM	4	S311	87.0781	50
6/20/2016 6:00:59 AM	6/20/2016 6:00:59 AM	4	S311	0	1
6/20/2016 6:02:29 AM	6/20/2016 6:02:29 AM	4	S311	0	2
6/20/2016 6:03:19 AM	6/20/2016 6:03:46 AM	4	S311	26.3281	14
6/20/2016 6:03:56 AM	6/20/2016 6:04:01 AM	4	S311	4.84375	1
6/20/2016 6:04:45 AM	6/20/2016 6:11:18 AM	4	S311	393.547	289
6/20/2016 6:11:46 AM	6/20/2016 6:12:48 AM	4	S311	62.1562	34
6/20/2016 6:12:56 AM	6/20/2016 6:12:56 AM	4	S311	0	1
6/20/2016 6:13:28 AM	6/20/2016 6:15:28 AM	4	S311	120.234	66
6/20/2016 6:16:05 AM	6/20/2016 6:17:56 AM	4	S311	110.828	57
6/20/2016 6:18:02 AM	6/20/2016 6:18:02 AM	4	S311	0	1
6/20/2016 6:18:45 AM	6/20/2016 6:19:54 AM	4	S311	68.0469	38
6/20/2016 6:19:59 AM	6/20/2016 6:19:59 AM	4	S311	0	1
6/20/2016 6:20:33 AM	6/20/2016 6:20:58 AM	4	S311	24.9062	15
6/20/2016 6:21:06 AM	6/20/2016 6:21:06 AM	4	S311	0	1
6/20/2016 6:21:38 AM	6/20/2016 6:23:41 AM	4	S311	122.953	67
6/20/2016 6:24:20 AM	6/20/2016 6:25:22 AM	4	S311	61.8281	33
6/20/2016 6:26:13 AM	6/20/2016 6:28:13 AM	4	S311	119.672	73
6/20/2016 6:28:23 AM	6/20/2016 6:28:23 AM	4	S311	0	1
6/20/2016 6:28:57 AM	6/20/2016 6:30:17 AM	4	S311	79.6406	48
6/20/2016 6:30:25 AM	6/20/2016 6:30:25 AM	4	S311	0	1
6/20/2016 6:30:57 AM	6/20/2016 6:31:33 AM	4	S311	36.5469	21
6/20/2016 6:32:21 AM	6/20/2016 6:32:41 AM	4	S311	19.1562	12
6/20/2016 6:32:49 AM	6/20/2016 6:32:49 AM	4	S311	0	1
6/20/2016 6:33:29 AM	6/20/2016 6:33:47 AM	4	S311	17.6562	12
6/20/2016 6:33:53 AM	6/20/2016 6:33:53 AM	4	S311	0	1
6/20/2016 6:34:39 AM	6/20/2016 6:34:54 AM	4	S311	14.7969	9
6/20/2016 6:35:00 AM	6/20/2016 6:35:00 AM	4	S311	0	1
6/20/2016 6:35:44 AM	6/20/2016 6:36:03 AM	4	S311	19.625	11
6/20/2016 6:36:46 AM	6/20/2016 6:37:11 AM	4	S311	24.4688	16
6/20/2016 6:37:19 AM	6/20/2016 6:37:19 AM	4	S311	0	1
6/20/2016 6:38:37 AM	6/20/2016 6:38:54 AM	4	S311	16.5781	9
6/20/2016 6:39:29 AM	6/20/2016 6:40:00 AM	4	S311	31.0781	21
6/20/2016 6:40:26 AM	6/20/2016 6:40:59 AM	4	S311	32.2812	24
6/20/2016 6:41:06 AM	6/20/2016 6:41:06 AM	4	S311	0	1
6/20/2016 6:41:37 AM	6/20/2016 6:42:08 AM	4	S311	31.3125	20
6/20/2016 6:42:35 AM	6/20/2016 6:43:13 AM	4	S311	37.5469	27
6/20/2016 6:43:19 AM	6/20/2016 6:43:19 AM	4	S311	0	1
6/20/2016 6:43:55 AM	6/20/2016 6:44:33 AM	4	S311	37.7969	29
6/20/2016 6:44:39 AM	6/20/2016 6:44:39 AM	4	S311	0	1
6/20/2016 6:44:50 AM	6/20/2016 6:45:36 AM	4	S311	46.0312	33
6/20/2016 6:45:43 AM	6/20/2016 6:45:43 AM	4	S311	0	1
6/20/2016 6:46:08 AM	6/20/2016 6:46:59 AM	4	S311	50.7031	36
6/20/2016 6:47:09 AM	6/20/2016 6:47:13 AM	4	S311	3.28125	1
6/20/2016 6:47:39 AM	6/20/2016 6:48:36 AM	4	S311	57.4531	39
6/20/2016 6:49:04 AM	6/20/2016 6:49:49 AM	4	S311	45.25	30
6/20/2016 6:49:55 AM	6/20/2016 6:49:55 AM	4	S311	0	1
6/20/2016 6:50:20 AM	6/20/2016 6:50:54 AM	4	S311	33.8594	23
6/20/2016 6:51:00 AM	6/20/2016 6:51:00 AM	4	S311	0	1
6/20/2016 6:51:39 AM	6/20/2016 6:52:00 AM	4	S311	21.4062	15
6/20/2016 6:52:08 AM	6/20/2016 6:52:08 AM	4	S311	0	1
6/20/2016 6:53:21 AM	6/20/2016 6:54:19 AM	4	S311	57.7031	41
6/20/2016 6:54:26 AM	6/20/2016 6:54:26 AM	4	S311	0	1
6/20/2016 6:55:08 AM	6/20/2016 6:55:35 AM	4	S311	26.8125	17
6/20/2016 6:55:42 AM	6/20/2016 6:55:42 AM	4	S311	0	1
6/20/2016 6:56:15 AM	6/20/2016 6:56:38 AM	4	S311	23	15
6/20/2016 6:56:49 AM	6/20/2016 6:56:49 AM	4	S311	0	1
6/20/2016 6:57:15 AM	6/20/2016 6:58:07 AM	4	S311	51.875	36
6/20/2016 6:58:17 AM	6/20/2016 6:58:17 AM	4	S311	0	1
6/20/2016 6:58:57 AM	6/20/2016 6:59:36 AM	4	S311	38.9062	26
6/20/2016 6:59:41 AM	6/20/2016 6:59:41 AM	4	S311	0	1
6/20/2016 7:00:33 AM	6/20/2016 7:01:13 AM	4	S311	40.125	29
6/20/2016 7:01:21 AM	6/20/2016 7:01:21 AM	4	S311	0	1
6/20/2016 7:02:26 AM	6/20/2016 7:03:53 AM	4	S311	86.25	57
6/20/2016 7:04:27 AM	6/20/2016 7:05:07 AM	4	S311	39.5312	25
6/20/2016 7:05:57 AM	6/20/2016 7:06:26 AM	4	S311	28.5625	17
6/20/2016 7:07:36 AM	6/20/2016 7:08:22 AM	4	S311	46.0625	31
6/20/2016 7:08:32 AM	6/20/2016 7:08:37 AM	4	S311	4.54688	1
6/20/2016 7:09:20 AM	6/20/2016 7:09:44 AM	4	S311	24.3125	14
6/20/2016 7:10:51 AM	6/20/2016 7:12:42 AM	4	S311	110.578	77
6/20/2016 7:12:48 AM	6/20/2016 7:12:48 AM	4	S311	0	1
6/20/2016 7:13:23 AM	6/20/2016 7:13:44 AM	4	S311	21.1562	12
6/20/2016 7:14:22 AM	6/20/2016 7:14:45 AM	4	S311	22.7031	15
6/20/2016 7:14:52 AM	6/20/2016 7:14:52 AM	4	S311	0	1
6/20/2016 7:15:47 AM	6/20/2016 7:16:33 AM	4	S311	45.3906	30
6/20/2016 7:17:02 AM	6/20/2016 7:18:52 AM	4	S311	109.875	72
6/20/2016 7:19:22 AM	6/20/2016 7:20:20 AM	4	S311	58.2188	37
6/20/2016 7:20:56 AM	6/20/2016 7:21:15 AM	4	S311	18.3281	10
6/20/2016 7:22:21 AM	6/20/2016 7:23:16 AM	4	S311	55.0938	36
6/20/2016 7:23:26 AM	6/20/2016 7:23:26 AM	4	S311	0	1
6/20/2016 7:25:00 AM	6/20/2016 7:25:18 AM	4	S311	17.9844	11
6/20/2016 7:25:24 AM	6/20/2016 7:25:24 AM	4	S311	0	1
6/20/2016 7:29:33 AM	6/20/2016 7:29:55 AM	4	S311	22.2344	14
6/20/2016 7:30:04 AM	6/20/2016 7:30:04 AM	4	S311	0	1
6/20/2016 7:30:22 AM	6/20/2016 7:31:50 AM	4	S311	87.1875	59
6/20/2016 7:31:57 AM	6/20/2016 7:31:57 AM	4	S311	0	1
6/20/2016 7:32:12 AM	6/20/2016 7:33:09 AM	4	S311	56.8438	39
6/20/2016 7:33:35 AM	6/20/2016 7:35:37 AM	4	S311	122.328	76
6/20/2016 7:36:24 AM	6/20/2016 7:36:48 AM	4	S311	24.75	16
6/20/2016 7:36:59 AM	6/20/2016 7:36:59 AM	4	S311	0	1
6/20/2016 7:37:21 AM	6/20/2016 7:38:30 AM	4	S311	68.8281	45
6/20/2016 7:40:17 AM	6/20/2016 7:41:29 AM	4	S311	71.9844	48
6/20/2016 7:41:37 AM	6/20/2016 7:41:37 AM	4	S311	0	1
6/20/2016 7:42:35 AM	6/20/2016 7:42:35 AM	4	S311	0	1
6/20/2016 7:43:21 AM	6/20/2016 7:43:21 AM	4	S311	0	1
6/20/2016 7:43:58 AM	6/20/2016 7:44:15 AM	4	S311	17.1719	12
6/20/2016 7:44:21 AM	6/20/2016 7:44:21 AM	4	S311	0	1
6/20/2016 7:44:48 AM	6/20/2016 7:45:28 AM	4	S311	40.5781	27
6/20/2016 7:45:57 AM	6/20/2016 7:47:41 AM	4	S311	104.406	65
6/20/2016 7:47:54 AM	6/20/2016 7:47:56 AM	4	S311	1.89062	1
6/20/2016 7:51:23 AM	6/20/2016 7:51:38 AM	4	S311	15.4062	9
6/20/2016 7:51:46 AM	6/20/2016 7:51:46 AM	4	S311	0	1
6/20/2016 7:51:55 AM	6/20/2016 7:52:36 AM	4	S311	40.9688	27
6/20/2016 7:52:46 AM	6/20/2016 7:52:46 AM	4	S311	0	1
6/20/2016 7:52:57 AM	6/20/2016 7:55:04 AM	4	S311	127.172	78
6/20/2016 7:55:15 AM	6/20/2016 7:55:15 AM	4	S311	0	1
6/20/2016 7:56:37 AM	6/20/2016 7:56:37 AM	4	S311	0	2
6/20/2016 7:59:26 AM	6/20/2016 7:59:52 AM	4	S311	25.2188	18
6/20/2016 7:59:59 AM	6/20/2016 7:59:59 AM	4	S311	0	1
6/20/2016 8:00:04 AM	6/20/2016 8:01:17 AM	4	S311	73.1562	53
6/20/2016 8:01:30 AM	6/20/2016 8:01:30 AM	4	S311	0	1
6/20/2016 8:01:56 AM	6/20/2016 8:01:56 AM	4	S311	0	1
6/20/2016 8:02:05 AM	6/20/2016 8:03:03 AM	4	S311	57.6875	40
6/20/2016 8:03:10 AM	6/20/2016 8:03:10 AM	4	S311	0	1
6/20/2016 8:03:34 AM	6/20/2016 8:04:11 AM	4	S311	37.3438	25
6/20/2016 8:04:17 AM	6/20/2016 8:04:17 AM	4	S311	0	1
6/20/2016 8:07:32 AM	6/20/2016 8:07:59 AM	4	S311	27.1875	17
6/20/2016 8:08:07 AM	6/20/2016 8:08:07 AM	4	S311	0	1
6/20/2016 8:09:46 AM	6/20/2016 8:09:46 AM	4	S311	0	1
6/20/2016 8:12:33 AM	6/20/2016 8:12:33 AM	4	S311	0	2
6/20/2016 8:14:04 AM	6/20/2016 8:14:19 AM	4	S311	15.0312	9
6/20/2016 8:14:30 AM	6/20/2016 8:14:30 AM	4	S311	0	1
6/20/2016 8:17:25 AM	6/20/2016 8:17:42 AM	4	S311	16.4062	11
6/20/2016 8:17:49 AM	6/20/2016 8:17:49 AM	4	S311	0	1
6/20/2016 8:18:16 AM	6/20/2016 8:18:34 AM	4	S311	18.1094	12
6/20/2016 8:21:54 AM	6/20/2016 8:21:54 AM	4	S311	0	4
6/20/2016 8:29:37 AM	6/20/2016 8:29:37 AM	4	S311	0	3
6/20/2016 8:30:28 AM	6/20/2016 8:30:50 AM	4	S311	21.9062	15
6/20/2016 8:30:56 AM	6/20/2016 8:30:56 AM	4	S311	0	1
6/20/2016 8:34:06 AM	6/20/2016 8:34:06 AM	4	S311	0	2
6/20/2016 8:34:30 AM	6/20/2016 8:34:30 AM	4	S311	0	1
6/20/2016 8:38:03 AM	6/20/2016 8:38:03 AM	4	S311	0	2
6/20/2016 8:40:24 AM	6/20/2016 8:40:24 AM	4	S311	0	1
6/20/2016 8:43:04 AM	6/20/2016 8:43:29 AM	4	S311	25.3281	16
6/20/2016 8:44:01 AM	6/20/2016 8:44:01 AM	4	S311	0	1
6/20/2016 8:44:33 AM	6/20/2016 8:44:33 AM	4	S311	0	1
6/20/2016 8:46:06 AM	6/20/2016 8:46:06 AM	4	S311	0	1
6/20/2016 8:49:55 AM	6/20/2016 8:50:20 AM	4	S311	24.5938	15
6/20/2016 8:51:11 AM	6/20/2016 8:51:11 AM	4	S311	0	1
6/20/2016 8:52:19 AM	6/20/2016 8:52:19 AM	4	S311	0	1
6/20/2016 8:52:47 AM	6/20/2016 8:54:12 AM	4	S311	84.9688	67
6/20/2016 8:54:19 AM	6/20/2016 8:54:30 AM	4	S311	11.1875	7
6/20/2016 8:54:35 AM	6/20/2016 8:54:35 AM	4	S311	0	1
6/20/2016 8:55:00 AM	6/20/2016 8:55:00 AM	4	S311	0	1
6/20/2016 8:55:05 AM	6/20/2016 8:55:34 AM	4	S311	28.7344	18
6/20/2016 8:56:05 AM	6/20/2016 8:58:21 AM	4	S311	135.906	101
6/20/2016 8:58:26 AM	6/20/2016 8:58:56 AM	4	S311	29.1562	15
6/20/2016 8:59:04 AM	6/20/2016 8:59:04 AM	4	S311	0	1
6/20/2016 8:59:44 AM	6/20/2016 8:59:44 AM	4	S311	0	1
6/20/2016 9:00:29 AM	6/20/2016 9:00:29 AM	4	S311	0	1
6/20/2016 9:01:04 AM	6/20/2016 9:01:04 AM	4	S311	0	2
6/20/2016 9:01:45 AM	6/20/2016 9:01:45 AM	4	S311	0	2
6/20/2016 9:02:33 AM	6/20/2016 9:03:42 AM	4	S311	69.9219	55
6/20/2016 9:03:58 AM	6/20/2016 9:03:58 AM	4	S311	0	1
6/20/2016 9:04:18 AM	6/20/2016 9:04:18 AM	4	S311	0	1
6/20/2016 9:04:44 AM	6/20/2016 9:05:33 AM	4	S311	49.5938	37
6/20/2016 9:05:40 AM	6/20/2016 9:05:40 AM	4	S311	0	1
6/20/2016 9:08:06 AM	6/20/2016 9:08:54 AM	4	S311	47.9844	40
6/20/2016 9:09:05 AM	6/20/2016 9:09:09 AM	4	S311	3.46875	1
6/20/2016 9:09:36 AM	6/20/2016 9:10:05 AM	4	S311	29.4375	20
6/20/2016 9:10:15 AM	6/20/2016 9:10:15 AM	4	S311	0	1
6/20/2016 9:14:19 AM	6/20/2016 9:14:39 AM	4	S311	20.2188	13
6/20/2016 9:14:53 AM	6/20/2016 9:14:53 AM	4	S311	0	1
6/20/2016 9:17:36 AM	6/20/2016 9:18:48 AM	4	S311	71.1094	53
6/20/2016 9:19:00 AM	6/20/2016 9:19:02 AM	4	S311	2.03125	1
6/20/2016 9:19:43 AM	6/20/2016 9:20:41 AM	4	S311	58.6719	41
6/20/2016 9:20:53 AM	6/20/2016 9:20:53 AM	4	S311	0	1
6/20/2016 9:22:08 AM	6/20/2016 9:22:49 AM	4	S311	40.9531	28
6/20/2016 9:22:55 AM	6/20/2016 9:22:55 AM	4	S311	0	1
6/20/2016 9:26:08 AM	6/20/2016 9:26:10 AM	4	S311	1.71875	2
6/20/2016 9:26:46 AM	6/20/2016 9:27:01 AM	4	S311	15.1094	9
6/20/2016 9:27:08 AM	6/20/2016 9:27:08 AM	4	S311	0	1
6/20/2016 9:29:45 AM	6/20/2016 9:31:36 AM	4	S311	111.578	83
6/20/2016 9:31:42 AM	6/20/2016 9:31:42 AM	4	S311	0	1
6/20/2016 9:31:59 AM	6/20/2016 9:32:25 AM	4	S311	25.3594	16
6/20/2016 9:32:33 AM	6/20/2016 9:32:33 AM	4	S311	0	1
6/20/2016 9:34:39 AM	6/20/2016 9:35:04 AM	4	S311	24.9688	16
6/20/2016 9:35:31 AM	6/20/2016 9:36:01 AM	4	S311	29.7031	20
6/20/2016 9:36:14 AM	6/20/2016 9:36:16 AM	4	S311	2.53125	1
6/20/2016 9:40:02 AM	6/20/2016 9:40:21 AM	4	S311	18.8594	12
6/20/2016 9:40:28 AM	6/20/2016 9:40:28 AM	4	S311	0	1
6/20/2016 9:41:27 AM	6/20/2016 9:41:49 AM	4	S311	22.0781	14
6/20/2016 9:41:56 AM	6/20/2016 9:41:56 AM	4	S311	0	1
6/20/2016 9:42:56 AM	6/20/2016 9:43:15 AM	4	S311	18.9062	12
6/20/2016 9:43:24 AM	6/20/2016 9:43:24 AM	4	S311	0	1
6/20/2016 9:47:42 AM	6/20/2016 9:47:42 AM	4	S311	0	2
6/20/2016 9:49:33 AM	6/20/2016 9:51:31 AM	4	S311	118.797	97
6/20/2016 9:51:37 AM	6/20/2016 9:51:51 AM	4	S311	13.8906	8
6/20/2016 9:51:58 AM	6/20/2016 9:51:58 AM	4	S311	0	1
6/20/2016 9:52:23 AM	6/20/2016 9:52:23 AM	4	S311	0	1
6/20/2016 9:53:17 AM	6/20/2016 9:53:35 AM	4	S311	17.9688	11
6/20/2016 9:56:25 AM	6/20/2016 9:56:25 AM	4	S311	0	1
6/20/2016 9:57:37 AM	6/20/2016 9:58:00 AM	4	S311	23.3438	15
6/20/2016 9:59:01 AM	6/20/2016 9:59:01 AM	4	S311	0	1
6/20/2016 9:59:38 AM	6/20/2016 9:59:38 AM	4	S311	0	1
6/20/2016 10:00:29 AM	6/20/2016 10:00:29 AM	4	S311	0	1
6/20/2016 10:02:41 AM	6/20/2016 10:03:02 AM	4	S311	21.5156	14
6/20/2016 10:07:21 AM	6/20/2016 10:07:21 AM	4	S311	0	2
6/20/2016 10:08:04 AM	6/20/2016 10:08:04 AM	4	S311	0	1
6/20/2016 10:10:05 AM	6/20/2016 10:10:05 AM	4	S311	0	2
6/20/2016 10:12:09 AM	6/20/2016 10:12:09 AM	4	S311	0	1
6/20/2016 10:16:01 AM	6/20/2016 10:16:01 AM	4	S311	0	3
6/20/2016 10:16:57 AM	6/20/2016 10:17:00 AM	4	S311	3.65625	2
6/20/2016 10:17:24 AM	6/20/2016 10:17:24 AM	4	S311	0	1
6/20/2016 10:18:17 AM	6/20/2016 10:18:18 AM	4	S311	0.859375	2
6/20/2016 10:18:45 AM	6/20/2016 10:19:16 AM	4	S311	31	22
6/20/2016 10:19:22 AM	6/20/2016 10:19:22 AM	4	S311	0	1
6/20/2016 10:20:09 AM	6/20/2016 10:20:09 AM	4	S311	0	2
6/20/2016 10:20:25 AM	6/20/2016 10:20:25 AM	4	S311	0	1
6/20/2016 10:20:41 AM	6/20/2016 10:20:46 AM	4	S311	4.51562	2
6/20/2016 10:21:54 AM	6/20/2016 10:21:54 AM	4	S311	0	1
6/20/2016 10:23:18 AM	6/20/2016 10:26:29 AM	4	S311	191	144
6/20/2016 10:26:35 AM	6/20/2016 10:26:35 AM	4	S311	0	1
6/20/2016 10:26:44 AM	6/20/2016 10:26:44 AM	4	S311	0	1
6/20/2016 10:27:10 AM	6/20/2016 10:27:42 AM	4	S311	32.3281	20
6/20/2016 10:28:50 AM	6/20/2016 10:28:50 AM	4	S311	0	1
6/20/2016 10:30:27 AM	6/20/2016 10:30:27 AM	4	S311	0	2
6/20/2016 10:31:56 AM	6/20/2016 10:33:17 AM	4	S311	80.7344	62
6/20/2016 10:33:36 AM	6/20/2016 10:33:36 AM	4	S311	0	1
6/20/2016 10:35:21 AM	6/20/2016 10:35:21 AM	4	S311	0	1
6/20/2016 10:39:09 AM	6/20/2016 10:39:55 AM	4	S311	46.8438	31
6/20/2016 10:40:54 AM	6/20/2016 10:41:31 AM	4	S311	36.9844	26
6/20/2016 10:41:37 AM	6/20/2016 10:41:37 AM	4	S311	0	1
6/20/2016 10:43:56 AM	6/20/2016 10:43:56 AM	4	S311	0	2
6/20/2016 10:44:57 AM	6/20/2016 10:46:38 AM	4	S311	100.453	78
6/20/2016 10:48:10 AM	6/20/2016 10:48:30 AM	4	S311	20.0312	11
6/20/2016 10:48:48 AM	6/20/2016 10:48:49 AM	4	S311	1.09375	1
6/20/2016 10:52:26 AM	6/20/2016 10:53:10 AM	4	S311	43.5625	27
6/20/2016 10:53:16 AM	6/20/2016 10:53:16 AM	4	S311	0	1
6/20/2016 10:54:22 AM	6/20/2016 10:54:54 AM	4	S311	32.1875	20
6/20/2016 10:58:04 AM	6/20/2016 10:58:41 AM	4	S311	36.6875	26
6/20/2016 10:58:54 AM	6/20/2016 10:58:55 AM	4	S311	0.921875	1
6/20/2016 10:59:27 AM	6/20/2016 10:59:43 AM	4	S311	15.9688	8
6/20/2016 11:00:01 AM	6/20/2016 11:00:02 AM	4	S311	0.796875	1
6/20/2016 11:02:47 AM	6/20/2016 11:03:26 AM	4	S311	38.9531	26
6/20/2016 11:03:36 AM	6/20/2016 11:03:36 AM	4	S311	0	1
6/20/2016 11:04:33 AM	6/20/2016 11:05:02 AM	4	S311	28.75	19
6/20/2016 11:08:04 AM	6/20/2016 11:08:41 AM	4	S311	36.9531	24
6/20/2016 11:09:13 AM	6/20/2016 11:09:45 AM	4	S311	31.7344	21
6/20/2016 11:09:51 AM	6/20/2016 11:09:51 AM	4	S311	0	1
6/20/2016 11:15:21 AM	6/20/2016 11:16:05 AM	4	S311	43.9844	31
6/20/2016 11:16:11 AM	6/20/2016 11:16:11 AM	4	S311	0	1
6/20/2016 11:21:55 AM	6/20/2016 11:23:26 AM	4	S311	91.7969	67
6/20/2016 11:24:24 AM	6/20/2016 11:25:15 AM	4	S311	50.625	32
6/20/2016 11:26:32 AM	6/20/2016 11:27:12 AM	4	S311	40.3594	25
6/20/2016 11:30:42 AM	6/20/2016 11:31:19 AM	4	S311	37.4062	24
6/20/2016 11:32:20 AM	6/20/2016 11:32:20 AM	4	S311	0	1
6/20/2016 11:32:27 AM	6/20/2016 11:32:27 AM	4	S311	0	1
6/20/2016 11:36:04 AM	6/20/2016 11:36:26 AM	4	S311	21.7656	13
6/20/2016 11:39:33 AM	6/20/2016 11:39:33 AM	4	S311	0	1
6/20/2016 11:39:43 AM	6/20/2016 11:39:43 AM	4	S311	0	1
6/20/2016 11:41:16 AM	6/20/2016 11:41:45 AM	4	S311	28.5469	17
6/20/2016 11:42:43 AM	6/20/2016 11:43:07 AM	4	S311	23.6094	14
6/20/2016 11:43:30 AM	6/20/2016 11:43:31 AM	4	S311	0.765625	1
6/20/2016 11:46:11 AM	6/20/2016 11:46:45 AM	4	S311	33.8906	20
6/20/2016 11:47:33 AM	6/20/2016 11:48:05 AM	4	S311	32.5781	20
6/20/2016 11:48:17 AM	6/20/2016 11:48:19 AM	4	S311	2.375	1
6/20/2016 11:50:05 AM	6/20/2016 11:50:50 AM	4	S311	44.9219	27
6/20/2016 11:52:11 AM	6/20/2016 11:52:11 AM	4	S311	0.203125	2
6/20/2016 11:55:13 AM	6/20/2016 11:55:33 AM	4	S311	19.5469	11
6/20/2016 11:58:54 AM	6/20/2016 11:59:12 AM	4	S311	17.2031	11
6/20/2016 11:59:18 AM	6/20/2016 11:59:18 AM	4	S311	0	1
6/20/2016 12:02:27 PM	6/20/2016 12:03:00 PM	4	S311	33.3594	21
6/20/2016 12:03:06 PM	6/20/2016 12:03:06 PM	4	S311	0	1
6/20/2016 12:05:08 PM	6/20/2016 12:05:21 PM	4	S311	13.375	9
6/20/2016 12:05:26 PM	6/20/2016 12:05:26 PM	4	S311	0	1
6/20/2016 12:08:43 PM	6/20/2016 12:08:44 PM	4	S311	0.1875	2
6/20/2016 12:08:53 PM	6/20/2016 12:08:53 PM	4	S311	0	1
6/20/2016 12:11:38 PM	6/20/2016 12:12:33 PM	4	S311	54.8906	38
6/20/2016 12:12:40 PM	6/20/2016 12:12:40 PM	4	S311	0	1
6/20/2016 12:13:28 PM	6/20/2016 12:13:50 PM	4	S311	22.3125	13
6/20/2016 12:13:55 PM	6/20/2016 12:13:55 PM	4	S311	0	1
6/20/2016 12:15:42 PM	6/20/2016 12:15:53 PM	4	S311	10.2344	6
6/20/2016 12:16:03 PM	6/20/2016 12:16:07 PM	4	S311	3.5625	1
6/20/2016 12:20:00 PM	6/20/2016 12:20:16 PM	4	S311	16.6406	9
6/20/2016 12:20:24 PM	6/20/2016 12:20:24 PM	4	S311	0	1
6/20/2016 12:23:05 PM	6/20/2016 12:23:12 PM	4	S311	7.1875	5
6/20/2016 12:23:18 PM	6/20/2016 12:23:18 PM	4	S311	0	1
6/20/2016 12:28:20 PM	6/20/2016 12:29:18 PM	4	S311	57.7188	39
6/20/2016 12:30:28 PM	6/20/2016 12:30:46 PM	4	S311	17.6875	11

## Sheet: S320
Start Time	Stop Time	Flight Mill #	Sample ID	Duration (sec)	Count (rotations on flight mill)
6/19/2016 2:30:30 PM	6/19/2016 2:42:16 PM	6	S320	706.031	726
6/19/2016 2:43:25 PM	6/19/2016 2:53:08 PM	6	S320	583.219	618
6/19/2016 2:54:57 PM	6/19/2016 3:02:38 PM	6	S320	460.812	474
6/19/2016 3:04:43 PM	6/19/2016 5:20:59 PM	6	S320	8175.56	7370
6/19/2016 5:34:14 PM	6/19/2016 6:04:42 PM	6	S320	1828.39	1459
6/19/2016 6:13:11 PM	6/19/2016 10:31:25 PM	6	S320	15493.8	12755
6/19/2016 10:35:57 PM	6/19/2016 10:35:57 PM	6	S320	0	1
6/19/2016 10:42:57 PM	6/19/2016 10:44:16 PM	6	S320	79.2969	44
6/19/2016 10:46:59 PM	6/19/2016 10:47:03 PM	6	S320	4.51562	2
6/19/2016 10:48:51 PM	6/19/2016 10:48:51 PM	6	S320	0	1
6/19/2016 10:50:27 PM	6/19/2016 10:50:27 PM	6	S320	0	1
6/19/2016 10:51:55 PM	6/19/2016 10:52:03 PM	6	S320	7.5625	4
6/20/2016 8:18:08 AM	6/20/2016 8:18:08 AM	6	S320	0	1
6/20/2016 8:19:50 AM	6/20/2016 8:26:32 AM	6	S320	402.25	356
6/20/2016 8:29:50 AM	6/20/2016 10:05:06 AM	6	S320	5716.41	4078
6/20/2016 10:09:13 AM	6/20/2016 10:09:13 AM	6	S320	0	1
6/20/2016 10:09:42 AM	6/20/2016 10:09:42 AM	6	S320	0	1
6/20/2016 10:10:05 AM	6/20/2016 10:19:31 AM	6	S320	566.266	400
6/20/2016 10:24:08 AM	6/20/2016 10:29:53 AM	6	S320	345.297	237
6/20/2016 10:33:30 AM	6/20/2016 10:38:03 AM	6	S320	273.344	182
6/20/2016 10:40:27 AM	6/20/2016 10:44:36 AM	6	S320	248.844	155
6/20/2016 10:48:49 AM	6/20/2016 10:48:52 AM	6	S320	2.9375	2
6/20/2016 10:49:24 AM	6/20/2016 10:49:24 AM	6	S320	0	1
6/20/2016 10:49:49 AM	6/20/2016 10:49:53 AM	6	S320	3.84375	2
6/20/2016 10:50:09 AM	6/20/2016 10:55:00 AM	6	S320	291.281	185
6/20/2016 10:55:51 AM	6/20/2016 10:58:04 AM	6	S320	132.812	87
6/20/2016 10:59:06 AM	6/20/2016 11:01:01 AM	6	S320	115.125	80
6/20/2016 11:04:21 AM	6/20/2016 11:07:19 AM	6	S320	177.672	107
6/20/2016 11:09:18 AM	6/20/2016 11:11:42 AM	6	S320	144.734	95
6/20/2016 11:12:57 AM	6/20/2016 11:14:36 AM	6	S320	98.4688	69
6/20/2016 11:18:02 AM	6/20/2016 11:19:47 AM	6	S320	105.391	79
6/20/2016 11:21:28 AM	6/20/2016 11:23:26 AM	6	S320	117.703	84
6/20/2016 11:25:16 AM	6/20/2016 11:26:55 AM	6	S320	98.7344	69
6/20/2016 11:31:37 AM	6/20/2016 11:33:22 AM	6	S320	104.562	80
6/20/2016 11:34:34 AM	6/20/2016 11:34:37 AM	6	S320	3.01562	2
6/20/2016 11:35:11 AM	6/20/2016 11:36:43 AM	6	S320	91.875	64
6/20/2016 11:39:08 AM	6/20/2016 11:40:44 AM	6	S320	96.0625	60
6/20/2016 11:43:33 AM	6/20/2016 11:43:42 AM	6	S320	8.78125	5
6/20/2016 11:44:32 AM	6/20/2016 11:44:32 AM	6	S320	0	1
6/20/2016 11:47:02 AM	6/20/2016 11:47:13 AM	6	S320	11.7188	4
6/20/2016 11:47:40 AM	6/20/2016 11:49:20 AM	6	S320	100.109	57
6/20/2016 11:50:17 AM	6/20/2016 11:50:24 AM	6	S320	6.89062	4
6/20/2016 11:50:55 AM	6/20/2016 11:52:44 AM	6	S320	108.844	65
6/20/2016 11:55:14 AM	6/20/2016 11:57:04 AM	6	S320	110.078	81
6/20/2016 11:58:50 AM	6/20/2016 12:00:44 PM	6	S320	113.844	65
6/20/2016 12:02:39 PM	6/20/2016 12:04:33 PM	6	S320	114.344	70
6/20/2016 12:10:04 PM	6/20/2016 12:13:05 PM	6	S320	181.109	103
6/20/2016 12:15:58 PM	6/20/2016 12:15:58 PM	6	S320	0	1
6/20/2016 12:16:33 PM	6/20/2016 12:17:43 PM	6	S320	69.7969	45
6/20/2016 12:20:12 PM	6/20/2016 12:20:24 PM	6	S320	11.375	6
6/20/2016 12:20:49 PM	6/20/2016 12:20:57 PM	6	S320	7.82812	5
6/20/2016 12:22:05 PM	6/20/2016 12:22:08 PM	6	S320	2.75	2
6/20/2016 12:22:42 PM	6/20/2016 12:24:11 PM	6	S320	89.8438	49
6/20/2016 12:26:04 PM	6/20/2016 12:27:53 PM	6	S320	109.266	61
6/20/2016 12:29:18 PM	6/20/2016 12:29:26 PM	6	S320	7.71875	4
6/20/2016 12:29:46 PM	6/20/2016 12:29:53 PM	6	S320	6.17188	4
6/20/2016 12:30:22 PM	6/20/2016 12:30:46 PM	6	S320	24.4531	19

## Sheet: W328
Start Time	Stop Time	Flight Mill #	Sample ID	Duration (sec)	Count (rotations on flight mill)
6/20/2016 3:43:48 PM	6/20/2016 3:43:48 PM	23	W328	0	1
6/20/2016 3:58:59 PM	6/20/2016 3:58:59 PM	23	W328	0	1
6/20/2016 4:46:33 PM	6/20/2016 4:46:33 PM	23	W328	0	1
6/20/2016 5:19:27 PM	6/20/2016 5:19:30 PM	23	W328	2.75	2
6/20/2016 5:19:40 PM	6/20/2016 5:20:06 PM	23	W328	25.4219	9
6/20/2016 5:20:13 PM	6/20/2016 5:20:15 PM	23	W328	2.60938	2
6/20/2016 5:20:29 PM	6/20/2016 5:20:34 PM	23	W328	5.09375	3
6/20/2016 5:20:47 PM	6/20/2016 5:20:47 PM	23	W328	0	1
6/20/2016 5:20:59 PM	6/20/2016 5:21:04 PM	23	W328	5.28125	3
6/20/2016 5:21:13 PM	6/20/2016 5:21:16 PM	23	W328	3.14062	2
6/20/2016 5:21:48 PM	6/20/2016 5:21:50 PM	23	W328	1.76562	2
6/20/2016 5:49:22 PM	6/20/2016 5:49:28 PM	23	W328	6.23438	4
6/20/2016 5:49:34 PM	6/20/2016 5:49:34 PM	23	W328	0	1
6/20/2016 5:49:43 PM	6/20/2016 5:49:45 PM	23	W328	2.25	2
6/20/2016 5:50:06 PM	6/20/2016 5:50:06 PM	23	W328	0	1
6/20/2016 5:50:19 PM	6/20/2016 5:50:26 PM	23	W328	7.14062	3
6/20/2016 5:50:32 PM	6/20/2016 5:50:35 PM	23	W328	2.23438	2
6/20/2016 5:50:58 PM	6/20/2016 5:50:58 PM	23	W328	0	1
6/20/2016 5:51:04 PM	6/20/2016 5:51:06 PM	23	W328	1.82812	2
6/20/2016 5:51:22 PM	6/20/2016 5:51:22 PM	23	W328	0	1
6/20/2016 5:51:38 PM	6/20/2016 5:51:39 PM	23	W328	1.82812	2
6/20/2016 5:51:48 PM	6/20/2016 5:51:55 PM	23	W328	6.65625	3
6/20/2016 5:52:02 PM	6/20/2016 5:52:04 PM	23	W328	2.34375	2
6/20/2016 5:52:23 PM	6/20/2016 5:52:26 PM	23	W328	2.76562	2
6/20/2016 5:52:56 PM	6/20/2016 5:52:56 PM	23	W328	0	1
6/20/2016 5:53:04 PM	6/20/2016 5:53:10 PM	23	W328	6.59375	3
6/20/2016 5:53:17 PM	6/20/2016 5:53:19 PM	23	W328	2.39062	2
6/20/2016 6:01:31 PM	6/20/2016 6:01:31 PM	23	W328	0	1
6/20/2016 6:01:42 PM	6/20/2016 6:01:42 PM	23	W328	0	1
6/20/2016 6:01:54 PM	6/20/2016 6:01:56 PM	23	W328	2.57812	2
6/20/2016 6:02:08 PM	6/20/2016 6:02:11 PM	23	W328	2.75	2
6/20/2016 6:24:15 PM	6/20/2016 6:25:31 PM	23	W328	75.5625	54
6/20/2016 6:25:38 PM	6/20/2016 6:25:38 PM	23	W328	0	1
6/20/2016 6:25:45 PM	6/20/2016 6:25:46 PM	23	W328	1.45312	2
6/20/2016 6:35:16 PM	6/20/2016 6:35:16 PM	23	W328	0	1
6/20/2016 6:35:27 PM	6/20/2016 6:35:30 PM	23	W328	3.09375	2
6/20/2016 6:35:38 PM	6/20/2016 6:35:42 PM	23	W328	3.29688	2

## Sheet: W332
Start Time	Stop Time	Flight Mill #	Sample ID	Duration (sec)	Count (rotations on flight mill)
6/20/2016 2:39:56 PM	6/20/2016 2:40:24 PM	14	W332	28.3594	9
6/20/2016 2:40:31 PM	6/20/2016 2:40:39 PM	14	W332	7.54688	3
6/20/2016 2:43:21 PM	6/20/2016 2:43:21 PM	14	W332	0	2
6/20/2016 2:44:39 PM	6/20/2016 2:44:39 PM	14	W332	0	1
6/20/2016 2:45:32 PM	6/20/2016 2:45:32 PM	14	W332	0	1
6/20/2016 2:46:06 PM	6/20/2016 2:46:11 PM	14	W332	4.6875	2
6/20/2016 2:47:44 PM	6/20/2016 2:55:04 PM	14	W332	440.547	158
6/20/2016 2:58:55 PM	6/20/2016 3:03:41 PM	14	W332	285.812	110
6/20/2016 3:03:50 PM	6/20/2016 3:03:50 PM	14	W332	0	1
6/20/2016 3:03:55 PM	6/20/2016 3:03:55 PM	14	W332	0	1
6/20/2016 3:04:01 PM	6/20/2016 3:04:01 PM	14	W332	0	1
6/20/2016 3:05:55 PM	6/20/2016 3:08:12 PM	14	W332	137.703	49
6/20/2016 3:10:52 PM	6/20/2016 3:13:03 PM	14	W332	131.25	49

## Sheet: S345
Start Time	Stop Time	Flight Mill #	Sample ID	Duration (sec)	Count (rotations on flight mill)
6/24/2016 2:09:13 PM	6/24/2016 4:31:28 PM	22	S345	8535.77	7150
6/24/2016 5:24:01 PM	6/24/2016 8:53:10 PM	22	S345	12548.8	8615
6/25/2016 7:41:17 AM	6/25/2016 7:41:38 AM	22	S345	20.5781	14
6/25/2016 10:14:33 AM	6/25/2016 11:59:40 AM	22	S345	6307.19	4056
6/25/2016 12:00:45 PM	6/25/2016 12:09:07 PM	22	S345	501.766	351

## Sheet: W358
Start Time	Stop Time	Flight Mill #	Sample ID	Duration (sec)	Count (rotations on flight mill)
6/26/2016 1:18:03 PM	6/26/2016 1:18:03 PM	17	W358	0	1
6/26/2016 1:18:40 PM	6/26/2016 1:18:43 PM	17	W358	3.8125	2
6/26/2016 1:19:20 PM	6/26/2016 1:19:24 PM	17	W358	4.03125	2
6/26/2016 1:20:05 PM	6/26/2016 1:20:11 PM	17	W358	6.51562	3
6/26/2016 1:21:00 PM	6/26/2016 1:21:05 PM	17	W358	5.375	3
6/26/2016 1:21:57 PM	6/26/2016 1:22:03 PM	17	W358	5.51562	3
6/26/2016 1:23:12 PM	6/26/2016 1:23:17 PM	17	W358	5.54688	3
6/26/2016 1:23:23 PM	6/26/2016 1:23:23 PM	17	W358	0	1
6/26/2016 1:24:51 PM	6/26/2016 1:24:56 PM	17	W358	5.51562	3
6/26/2016 1:25:57 PM	6/26/2016 1:26:03 PM	17	W358	6.57812	3
6/26/2016 1:28:00 PM	6/26/2016 1:28:07 PM	17	W358	7.0625	3
6/26/2016 1:29:44 PM	6/26/2016 1:29:47 PM	17	W358	3.67188	2
6/26/2016 1:31:03 PM	6/26/2016 1:31:06 PM	17	W358	2.85938	2
6/26/2016 1:31:12 PM	6/26/2016 1:31:12 PM	17	W358	0	1
6/26/2016 1:34:09 PM	6/26/2016 1:34:11 PM	17	W358	2.8125	2
6/26/2016 1:35:52 PM	6/26/2016 1:35:55 PM	17	W358	2.89062	3
6/26/2016 1:38:30 PM	6/26/2016 1:38:33 PM	17	W358	3.17188	4
6/26/2016 1:39:40 PM	6/26/2016 1:39:43 PM	17	W358	2.89062	2
6/26/2016 1:39:50 PM	6/26/2016 1:39:53 PM	17	W358	3.57812	1
6/26/2016 1:40:46 PM	6/26/2016 1:40:46 PM	17	W358	0.25	1
6/26/2016 1:42:30 PM	6/26/2016 1:42:30 PM	17	W358	0	1
6/26/2016 1:43:26 PM	6/26/2016 1:43:33 PM	17	W358	7.04688	3
6/26/2016 1:45:06 PM	6/26/2016 1:45:09 PM	17	W358	3.65625	2
6/26/2016 1:46:31 PM	6/26/2016 1:46:35 PM	17	W358	3.23438	2
6/26/2016 1:47:54 PM	6/26/2016 1:47:58 PM	17	W358	4.54688	2
6/26/2016 1:49:24 PM	6/26/2016 1:49:24 PM	17	W358	0	1
6/26/2016 1:49:31 PM	6/26/2016 1:49:31 PM	17	W358	0	1
6/26/2016 1:50:40 PM	6/26/2016 1:50:40 PM	17	W358	0	1
6/26/2016 1:51:49 PM	6/26/2016 1:51:50 PM	17	W358	0.3125	2
6/26/2016 1:52:53 PM	6/26/2016 1:52:58 PM	17	W358	5.79688	3
6/26/2016 1:54:18 PM	6/26/2016 1:54:23 PM	17	W358	4.60938	2
6/26/2016 1:55:15 PM	6/26/2016 1:55:21 PM	17	W358	5.6875	3
6/26/2016 1:55:57 PM	6/26/2016 1:56:01 PM	17	W358	4.17188	2
6/26/2016 1:57:00 PM	6/26/2016 1:57:04 PM	17	W358	3.57812	2
6/26/2016 1:59:31 PM	6/26/2016 1:59:36 PM	17	W358	5.42188	2
6/26/2016 2:00:27 PM	6/26/2016 2:00:30 PM	17	W358	3.23438	2
6/26/2016 2:02:11 PM	6/26/2016 2:02:14 PM	17	W358	3.67188	2
6/26/2016 2:03:59 PM	6/26/2016 2:04:02 PM	17	W358	2.90625	2
6/26/2016 2:04:52 PM	6/26/2016 2:04:55 PM	17	W358	3.20312	2
6/26/2016 2:07:17 PM	6/26/2016 2:07:21 PM	17	W358	4.59375	2
6/26/2016 2:08:00 PM	6/26/2016 2:08:04 PM	17	W358	4.09375	2
6/26/2016 2:09:38 PM	6/26/2016 2:09:42 PM	17	W358	3.57812	2
6/26/2016 2:11:20 PM	6/26/2016 2:11:20 PM	17	W358	0	1
6/26/2016 2:12:47 PM	6/26/2016 2:12:52 PM	17	W358	4.29688	2
6/26/2016 2:14:02 PM	6/26/2016 2:14:05 PM	17	W358	3.875	2
6/26/2016 2:15:20 PM	6/26/2016 2:15:23 PM	17	W358	3.76562	2
6/26/2016 2:17:25 PM	6/26/2016 2:17:29 PM	17	W358	4.42188	2
6/26/2016 2:18:58 PM	6/26/2016 2:18:58 PM	17	W358	0	1
6/26/2016 2:19:03 PM	6/26/2016 2:19:03 PM	17	W358	0	1
6/26/2016 2:20:37 PM	6/26/2016 2:20:41 PM	17	W358	3.79688	2
6/26/2016 2:22:22 PM	6/26/2016 2:22:22 PM	17	W358	0	1
6/26/2016 2:24:59 PM	6/26/2016 2:24:59 PM	17	W358	0	1
6/26/2016 2:25:34 PM	6/26/2016 2:25:34 PM	17	W358	0	1
6/26/2016 2:26:16 PM	6/26/2016 2:26:16 PM	17	W358	0	2
6/26/2016 2:26:23 PM	6/26/2016 2:26:23 PM	17	W358	0	1
6/26/2016 2:26:57 PM	6/26/2016 2:27:00 PM	17	W358	3.125	2
6/26/2016 2:27:14 PM	6/26/2016 2:27:16 PM	17	W358	2.79688	2
6/26/2016 2:27:23 PM	6/26/2016 2:27:23 PM	17	W358	0	1
6/26/2016 2:29:02 PM	6/26/2016 2:29:08 PM	17	W358	5.39062	3
6/26/2016 2:29:38 PM	6/26/2016 2:29:42 PM	17	W358	3.95312	2
6/26/2016 2:30:37 PM	6/26/2016 2:30:37 PM	17	W358	0	1
6/26/2016 2:30:43 PM	6/26/2016 2:30:43 PM	17	W358	0	1
6/26/2016 2:33:08 PM	6/26/2016 2:33:13 PM	17	W358	4.51562	2
6/26/2016 2:35:20 PM	6/26/2016 2:35:26 PM	17	W358	6.65625	3
6/26/2016 2:37:05 PM	6/26/2016 2:37:10 PM	17	W358	4.35938	2
6/26/2016 2:38:03 PM	6/26/2016 2:38:06 PM	17	W358	3.6875	2
6/26/2016 2:40:39 PM	6/26/2016 2:40:43 PM	17	W358	3.70312	2
6/26/2016 2:41:32 PM	6/26/2016 2:41:35 PM	17	W358	3.28125	2
6/26/2016 2:44:34 PM	6/26/2016 2:44:39 PM	17	W358	5.17188	2
6/26/2016 2:45:20 PM	6/26/2016 2:45:24 PM	17	W358	4.3125	2
6/26/2016 2:46:26 PM	6/26/2016 2:46:29 PM	17	W358	3.04688	2
6/26/2016 2:50:46 PM	6/26/2016 2:53:08 PM	17	W358	142	81
6/26/2016 2:54:27 PM	6/26/2016 2:54:30 PM	17	W358	3.25	2
6/26/2016 2:55:10 PM	6/26/2016 2:55:13 PM	17	W358	3.01562	2
6/26/2016 2:55:28 PM	6/26/2016 2:55:31 PM	17	W358	2.89062	2
6/26/2016 2:55:56 PM	6/26/2016 2:55:56 PM	17	W358	0	1
6/26/2016 2:57:20 PM	6/26/2016 2:57:20 PM	17	W358	0	1
6/26/2016 2:57:42 PM	6/26/2016 2:57:47 PM	17	W358	4.17188	2
6/26/2016 2:59:16 PM	6/26/2016 2:59:19 PM	17	W358	3.32812	2
6/26/2016 3:00:48 PM	6/26/2016 3:00:52 PM	17	W358	4.70312	3
6/26/2016 3:00:59 PM	6/26/2016 3:00:59 PM	17	W358	0	1
6/26/2016 3:02:27 PM	6/26/2016 3:02:30 PM	17	W358	2.84375	2
6/26/2016 3:03:03 PM	6/26/2016 3:03:07 PM	17	W358	4.96875	3
6/26/2016 3:04:56 PM	6/26/2016 3:04:59 PM	17	W358	3.25	3
6/26/2016 3:07:15 PM	6/26/2016 3:07:18 PM	17	W358	3.23438	2
6/26/2016 3:07:53 PM	6/26/2016 3:08:51 PM	17	W358	57.9219	33
6/26/2016 3:08:57 PM	6/26/2016 3:08:57 PM	17	W358	0	1
6/26/2016 3:10:18 PM	6/26/2016 3:10:23 PM	17	W358	5.07812	4
6/26/2016 3:17:25 PM	6/26/2016 3:17:28 PM	17	W358	2.96875	3
6/26/2016 3:19:03 PM	6/26/2016 3:19:09 PM	17	W358	5.40625	2
6/26/2016 3:20:53 PM	6/26/2016 3:20:55 PM	17	W358	1.95312	1
6/26/2016 3:22:45 PM	6/26/2016 3:22:48 PM	17	W358	2.67188	2
6/26/2016 3:22:54 PM	6/26/2016 3:22:54 PM	17	W358	0	1
6/26/2016 3:25:05 PM	6/26/2016 3:25:05 PM	17	W358	0	1
6/26/2016 3:29:21 PM	6/26/2016 3:29:25 PM	17	W358	4.23438	2
6/26/2016 3:31:14 PM	6/26/2016 3:31:14 PM	17	W358	0	1
6/26/2016 3:31:22 PM	6/26/2016 3:31:24 PM	17	W358	1.45312	1
6/26/2016 3:32:22 PM	6/26/2016 3:32:27 PM	17	W358	4.51562	2
6/26/2016 3:35:35 PM	6/26/2016 3:35:37 PM	17	W358	1.07812	1
6/26/2016 3:36:19 PM	6/26/2016 3:36:19 PM	17	W358	0	1
6/26/2016 3:37:35 PM	6/26/2016 3:37:35 PM	17	W358	0	1
6/26/2016 3:37:43 PM	6/26/2016 3:37:45 PM	17	W358	2.03125	1
6/26/2016 3:43:04 PM	6/26/2016 3:43:07 PM	17	W358	3.70312	2
6/26/2016 3:45:32 PM	6/26/2016 3:45:35 PM	17	W358	3.59375	2
6/26/2016 3:49:19 PM	6/26/2016 3:49:28 PM	17	W358	9.04688	4
6/26/2016 3:55:46 PM	6/26/2016 3:55:49 PM	17	W358	3.21875	2
6/26/2016 3:58:56 PM	6/26/2016 3:59:00 PM	17	W358	4.60938	2
6/26/2016 4:03:26 PM	6/26/2016 4:03:29 PM	17	W358	3.39062	2
6/26/2016 4:15:51 PM	6/26/2016 4:15:57 PM	17	W358	6.35938	3
6/26/2016 4:17:57 PM	6/26/2016 4:18:05 PM	17	W358	7.92188	3
6/26/2016 4:19:34 PM	6/26/2016 4:19:37 PM	17	W358	3.64062	2
6/26/2016 4:22:08 PM	6/26/2016 4:22:13 PM	17	W358	5	3
6/26/2016 4:29:58 PM	6/26/2016 4:29:58 PM	17	W358	0	1
6/26/2016 4:31:52 PM	6/26/2016 4:31:55 PM	17	W358	3.1875	2
6/26/2016 4:36:06 PM	6/26/2016 4:36:06 PM	17	W358	0	1
6/26/2016 4:38:05 PM	6/26/2016 4:38:05 PM	17	W358	0	1
6/26/2016 4:38:11 PM	6/26/2016 4:38:11 PM	17	W358	0	1
6/26/2016 4:39:51 PM	6/26/2016 4:39:55 PM	17	W358	3.59375	2
6/26/2016 4:42:19 PM	6/26/2016 4:42:19 PM	17	W358	0	1
6/26/2016 4:42:25 PM	6/26/2016 4:42:25 PM	17	W358	0	1
6/26/2016 4:43:23 PM	6/26/2016 4:45:25 PM	17	W358	121.984	71
6/26/2016 4:47:00 PM	6/26/2016 4:47:00 PM	17	W358	0	1
6/26/2016 4:47:36 PM	6/26/2016 4:47:39 PM	17	W358	2.46875	2
6/26/2016 4:47:44 PM	6/26/2016 4:47:44 PM	17	W358	0	1
6/26/2016 4:49:39 PM	6/26/2016 4:49:49 PM	17	W358	9.125	5
6/26/2016 4:52:10 PM	6/26/2016 4:52:14 PM	17	W358	3.76562	2
6/26/2016 4:57:50 PM	6/26/2016 4:57:53 PM	17	W358	3.23438	2
6/26/2016 5:09:55 PM	6/26/2016 5:09:58 PM	17	W358	3.3125	2
6/26/2016 5:12:18 PM	6/26/2016 5:12:18 PM	17	W358	0	1
6/26/2016 5:15:18 PM	6/26/2016 5:15:21 PM	17	W358	2.90625	2
6/26/2016 5:17:23 PM	6/26/2016 5:17:23 PM	17	W358	0	1
6/26/2016 5:17:30 PM	6/26/2016 5:17:32 PM	17	W358	2.15625	1
6/26/2016 5:18:07 PM	6/26/2016 5:18:12 PM	17	W358	4.34375	2
6/26/2016 5:22:31 PM	6/26/2016 5:22:34 PM	17	W358	2.79688	2
6/26/2016 5:26:09 PM	6/26/2016 5:26:14 PM	17	W358	4.10938	2
6/26/2016 5:28:46 PM	6/26/2016 5:28:49 PM	17	W358	3.26562	2
6/26/2016 5:32:49 PM	6/26/2016 5:32:53 PM	17	W358	3.42188	2
6/26/2016 5:36:40 PM	6/26/2016 5:36:40 PM	17	W358	0	1
6/26/2016 5:38:33 PM	6/26/2016 5:38:33 PM	17	W358	0	1
6/26/2016 5:39:31 PM	6/26/2016 5:39:34 PM	17	W358	2.84375	3
6/26/2016 5:40:55 PM	6/26/2016 5:41:00 PM	17	W358	4.53125	3
6/26/2016 5:48:24 PM	6/26/2016 5:48:24 PM	17	W358	0	1
6/26/2016 5:48:31 PM	6/26/2016 5:48:33 PM	17	W358	2.07812	1
6/26/2016 5:50:11 PM	6/26/2016 5:50:14 PM	17	W358	3.48438	2
6/26/2016 5:52:52 PM	6/26/2016 5:52:56 PM	17	W358	4.10938	2
6/26/2016 5:57:27 PM	6/26/2016 5:57:31 PM	17	W358	4.04688	2
6/26/2016 5:58:21 PM	6/26/2016 5:58:24 PM	17	W358	3.60938	2
6/26/2016 6:01:34 PM	6/26/2016 6:01:38 PM	17	W358	3.67188	2
6/26/2016 6:04:22 PM	6/26/2016 6:04:22 PM	17	W358	0	1
6/26/2016 6:04:28 PM	6/26/2016 6:04:28 PM	17	W358	0	1
6/26/2016 6:10:39 PM	6/26/2016 6:10:42 PM	17	W358	2.98438	2
6/26/2016 6:12:49 PM	6/26/2016 6:12:49 PM	17	W358	0	1
6/26/2016 6:13:26 PM	6/26/2016 6:13:29 PM	17	W358	2.70312	2
6/26/2016 6:15:46 PM	6/26/2016 6:15:46 PM	17	W358	0	1
6/26/2016 6:21:53 PM	6/26/2016 6:22:00 PM	17	W358	6.6875	4
6/26/2016 6:24:10 PM	6/26/2016 6:24:10 PM	17	W358	0	1
6/26/2016 6:24:16 PM	6/26/2016 6:24:21 PM	17	W358	4.84375	1
6/26/2016 6:26:34 PM	6/26/2016 6:27:27 PM	17	W358	52.8438	31
6/26/2016 6:40:39 PM	6/26/2016 6:40:39 PM	17	W358	0	1
6/26/2016 6:46:38 PM	6/26/2016 6:46:38 PM	17	W358	0	1
6/26/2016 6:53:35 PM	6/26/2016 6:53:35 PM	17	W358	0	1
6/26/2016 7:01:49 PM	6/26/2016 7:01:52 PM	17	W358	3.67188	3
6/26/2016 7:05:04 PM	6/26/2016 7:05:04 PM	17	W358	0	1
6/26/2016 7:06:12 PM	6/26/2016 7:07:48 PM	17	W358	96.6562	59
6/26/2016 7:09:52 PM	6/26/2016 7:09:56 PM	17	W358	3.84375	2
6/26/2016 7:10:30 PM	6/26/2016 7:10:33 PM	17	W358	3	2
6/26/2016 7:13:13 PM	6/26/2016 7:13:17 PM	17	W358	4.32812	3
6/26/2016 7:22:10 PM	6/26/2016 7:22:10 PM	17	W358	0	1
6/26/2016 8:35:30 PM	6/26/2016 8:35:32 PM	17	W358	2.0625	1
6/26/2016 8:36:59 PM	6/26/2016 8:36:59 PM	17	W358	0	1
6/26/2016 10:28:15 PM	6/26/2016 10:28:15 PM	17	W358	0	1
6/26/2016 11:13:00 PM	6/26/2016 11:13:00 PM	17	W358	0	2
6/27/2016 2:04:49 AM	6/27/2016 2:04:49 AM	17	W358	0	1
6/27/2016 2:46:49 AM	6/27/2016 2:46:49 AM	17	W358	0	1
6/27/2016 3:51:11 AM	6/27/2016 3:51:11 AM	17	W358	0	1
6/27/2016 4:38:29 AM	6/27/2016 4:38:34 AM	17	W358	5.34375	2
6/27/2016 5:06:29 AM	6/27/2016 5:06:29 AM	17	W358	0	1
6/27/2016 5:31:23 AM	6/27/2016 5:31:23 AM	17	W358	0	2
6/27/2016 5:38:55 AM	6/27/2016 5:38:59 AM	17	W358	3.625	2
6/27/2016 5:39:04 AM	6/27/2016 5:39:04 AM	17	W358	0	1
6/27/2016 6:00:58 AM	6/27/2016 6:00:58 AM	17	W358	0	1
6/27/2016 6:01:06 AM	6/27/2016 6:01:08 AM	17	W358	1.95312	1
6/27/2016 6:06:00 AM	6/27/2016 6:09:21 AM	17	W358	201.375	95
6/27/2016 6:12:05 AM	6/27/2016 6:12:05 AM	17	W358	0	1
6/27/2016 6:20:18 AM	6/27/2016 6:20:18 AM	17	W358	0	2
6/27/2016 6:39:44 AM	6/27/2016 6:39:44 AM	17	W358	0	1
6/27/2016 7:04:31 AM	6/27/2016 7:04:31 AM	17	W358	0	1
6/27/2016 7:06:54 AM	6/27/2016 7:06:54 AM	17	W358	0	1
6/27/2016 7:08:06 AM	6/27/2016 7:08:10 AM	17	W358	4.84375	2
6/27/2016 7:38:59 AM	6/27/2016 7:38:59 AM	17	W358	0	1
6/27/2016 7:43:32 AM	6/27/2016 7:43:37 AM	17	W358	4.625	3
6/27/2016 7:44:27 AM	6/27/2016 7:44:27 AM	17	W358	0	1
6/27/2016 7:50:45 AM	6/27/2016 7:50:45 AM	17	W358	0	1
6/27/2016 8:00:19 AM	6/27/2016 8:00:19 AM	17	W358	0	1
6/27/2016 8:01:17 AM	6/27/2016 8:01:17 AM	17	W358	0	1
6/27/2016 8:07:47 AM	6/27/2016 8:07:47 AM	17	W358	0	1
6/27/2016 8:12:26 AM	6/27/2016 8:12:26 AM	17	W358	0	3
6/27/2016 8:17:59 AM	6/27/2016 8:17:59 AM	17	W358	0	1
6/27/2016 8:18:45 AM	6/27/2016 8:18:45 AM	17	W358	0	1
6/27/2016 8:24:46 AM	6/27/2016 8:24:46 AM	17	W358	0	1
6/27/2016 8:25:35 AM	6/27/2016 8:25:35 AM	17	W358	0	1
6/27/2016 8:53:08 AM	6/27/2016 8:53:08 AM	17	W358	0	4
6/27/2016 8:54:39 AM	6/27/2016 8:54:43 AM	17	W358	4.25	3
6/27/2016 9:00:36 AM	6/27/2016 9:00:36 AM	17	W358	0	1
6/27/2016 9:48:57 AM	6/27/2016 9:48:57 AM	17	W358	0	2
6/27/2016 9:51:28 AM	6/27/2016 9:51:28 AM	17	W358	0	1
6/27/2016 9:52:03 AM	6/27/2016 9:52:03 AM	17	W358	0	1
6/27/2016 9:54:13 AM	6/27/2016 9:54:13 AM	17	W358	0	1
6/27/2016 9:57:37 AM	6/27/2016 9:57:37 AM	17	W358	0	2
6/27/2016 10:00:39 AM	6/27/2016 10:00:39 AM	17	W358	0	2

## Sheet: S387
Start Time	Stop Time	Flight Mill #	Sample ID	Duration (sec)	Count (rotations on flight mill)
6/27/2016 2:00:45 PM	6/27/2016 2:01:01 PM	6	S387	15.6719	8
6/27/2016 2:06:05 PM	6/27/2016 2:06:14 PM	6	S387	8.85938	5
6/27/2016 2:08:01 PM	6/27/2016 2:08:09 PM	6	S387	7.28125	3
6/27/2016 2:09:48 PM	6/27/2016 2:10:08 PM	6	S387	20.0312	10
6/27/2016 2:13:39 PM	6/27/2016 2:13:59 PM	6	S387	19.5312	10
6/27/2016 2:16:45 PM	6/27/2016 2:16:50 PM	6	S387	5.0625	3
6/27/2016 2:20:01 PM	6/27/2016 2:20:01 PM	6	S387	0	1
6/27/2016 2:21:09 PM	6/27/2016 2:21:14 PM	6	S387	4.8125	3
6/27/2016 2:21:20 PM	6/27/2016 2:21:20 PM	6	S387	0	1
6/27/2016 2:23:31 PM	6/27/2016 2:23:38 PM	6	S387	6.6875	3
6/27/2016 2:29:08 PM	6/27/2016 2:49:11 PM	6	S387	1203.02	731
6/27/2016 2:50:10 PM	6/27/2016 6:32:24 PM	6	S387	13333.7	7539
6/27/2016 6:33:08 PM	6/27/2016 7:29:00 PM	6	S387	3352.02	1377
6/27/2016 7:29:07 PM	6/27/2016 7:29:07 PM	6	S387	0	1
6/27/2016 7:31:36 PM	6/27/2016 7:31:47 PM	6	S387	11.375	4
6/27/2016 7:32:59 PM	6/27/2016 7:39:33 PM	6	S387	393.812	147
6/27/2016 7:39:39 PM	6/27/2016 7:39:39 PM	6	S387	0	1
6/27/2016 7:45:52 PM	6/27/2016 7:55:16 PM	6	S387	563.734	175
6/27/2016 7:56:00 PM	6/27/2016 7:56:00 PM	6	S387	0	1
6/27/2016 7:57:20 PM	6/27/2016 8:02:17 PM	6	S387	296.578	102
6/27/2016 8:02:24 PM	6/27/2016 8:02:24 PM	6	S387	0	1
6/27/2016 8:16:03 PM	6/27/2016 8:16:31 PM	6	S387	27.6094	12
6/27/2016 8:17:58 PM	6/27/2016 8:31:01 PM	6	S387	783.5	294
6/27/2016 8:31:08 PM	6/27/2016 8:31:08 PM	6	S387	0	1
6/27/2016 8:31:57 PM	6/27/2016 8:36:37 PM	6	S387	280.469	87
6/27/2016 8:36:43 PM	6/27/2016 8:36:43 PM	6	S387	0	1
6/28/2016 9:54:33 AM	6/28/2016 9:54:39 AM	6	S387	6.03125	3
6/28/2016 10:52:29 AM	6/28/2016 10:52:33 AM	6	S387	3.45312	2
6/28/2016 11:31:58 AM	6/28/2016 11:32:16 AM	6	S387	17.8594	6
6/28/2016 11:56:33 AM	6/28/2016 11:56:42 AM	6	S387	8.1875	4

[truncated: 5 more sheets: S385, S393, S409, W418, LightDark flight duration]
